# Supplementary material for: Deep longitudinal multi-omics analysis of Bordetella pertussis cultivated in bioreactors highlights medium starvations and transitory metabolisms, associated to vaccine antigen biosynthesis variations and global virulence regulation
Source: Frontiers journal article supplement (doi:10.3389/fmicb.2023.1036386), 2023-02-14
Supplement: Data_Sheet_1.PDF [file Data_Sheet_1.PDF]

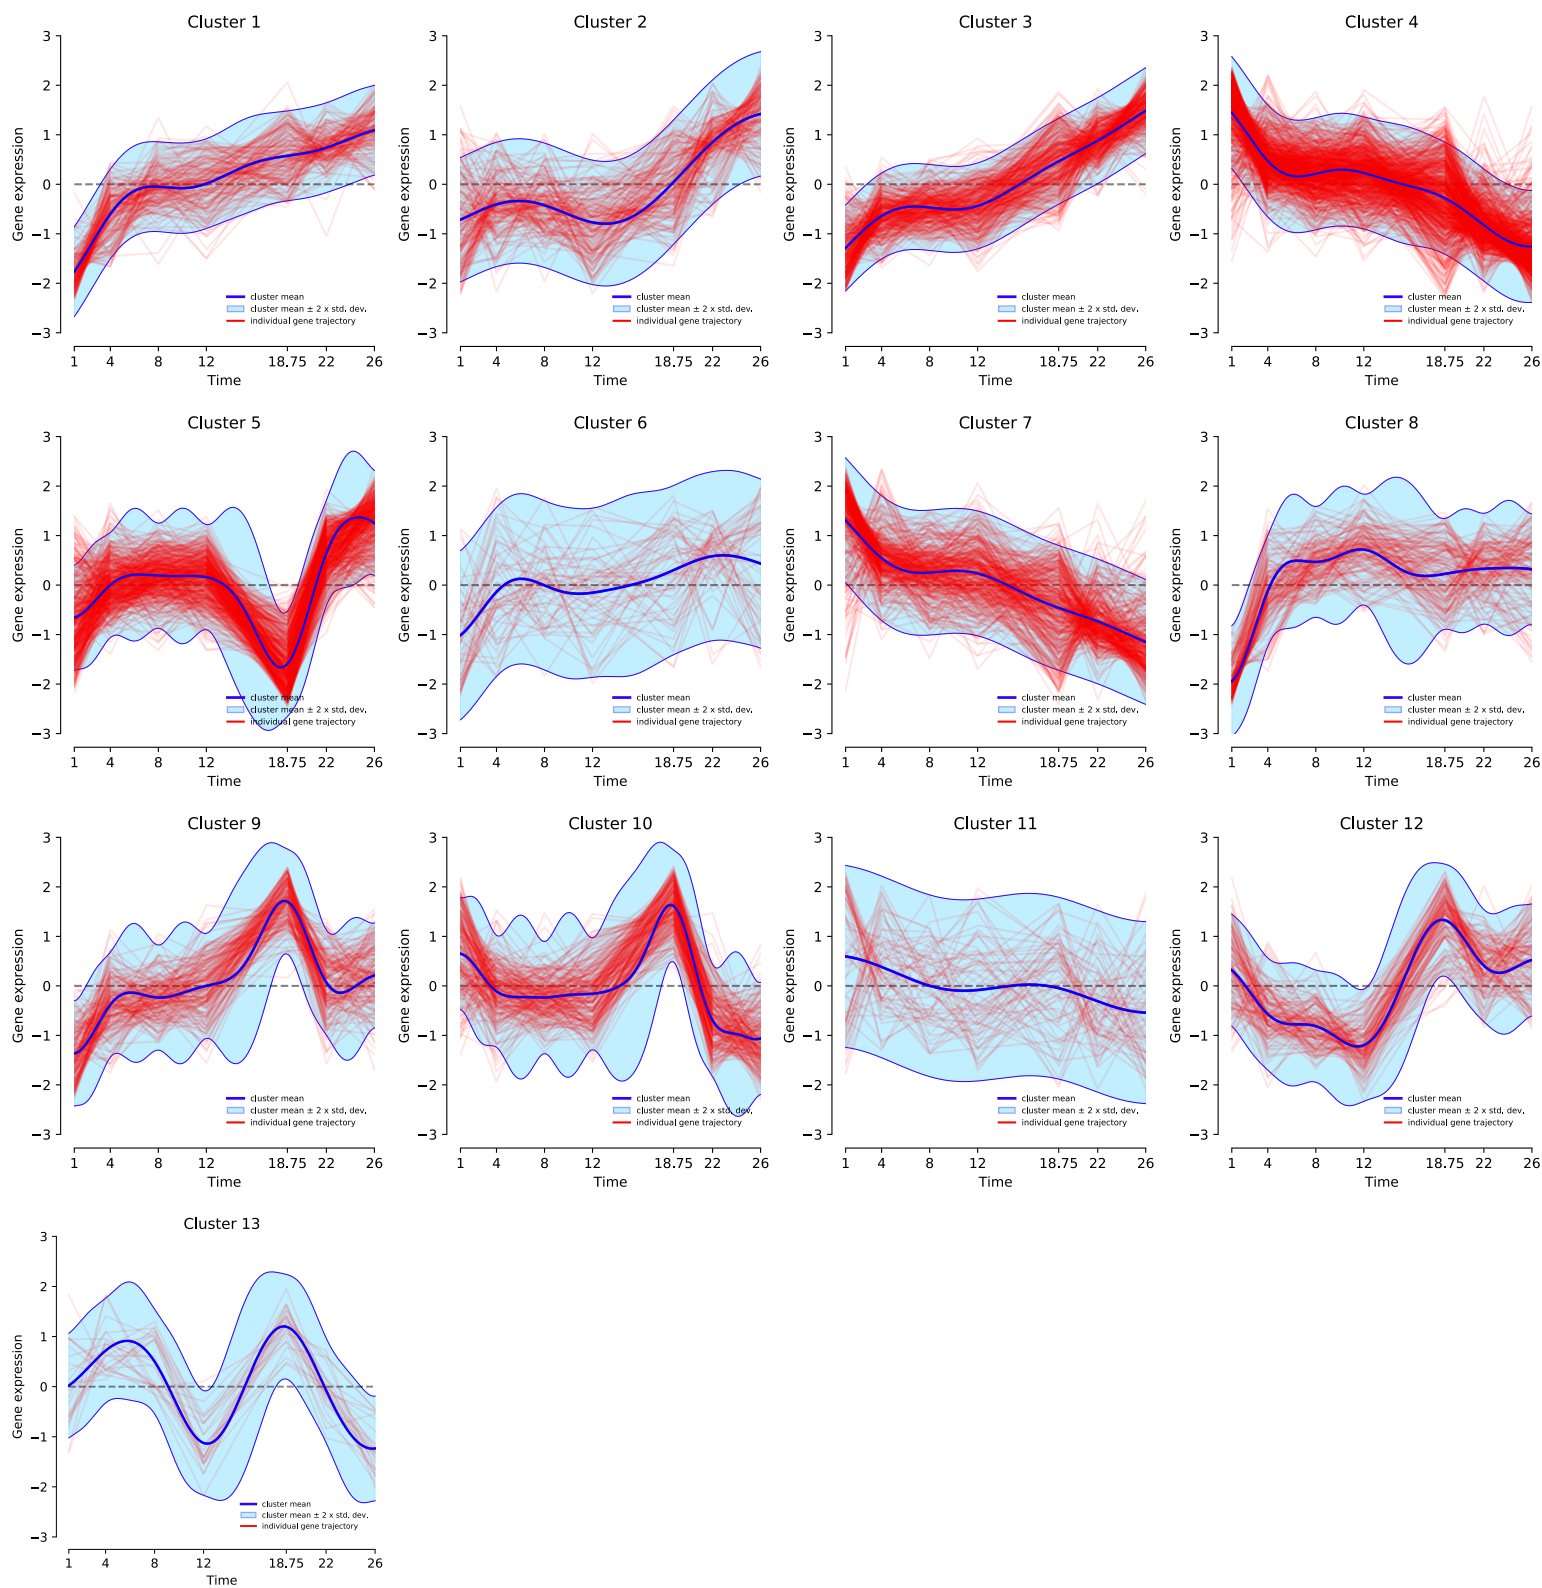

Supplementary Figure 1: Longitudinal clusters of transcriptomic data of *B. pertussis* culture. X-axis correspond to the time and Y-axis correspond to the gene expression. Blue line corresponds to the cluster mean, light blue interval corresponds to the cluster mean  $\pm 2$  x standard deviation and red line corresponds to the individual transcript trajectories.
