# Supplementary material for: Deep longitudinal multi-omics analysis of Bordetella pertussis cultivated in bioreactors highlights medium starvations and transitory metabolisms, associated to vaccine antigen biosynthesis variations and global virulence regulation
Source: Frontiers journal article supplement (doi:10.3389/fmicb.2023.1036386), 2023-02-14
Supplement: Data_Sheet_2.pdf [file Data_Sheet_2.pdf]

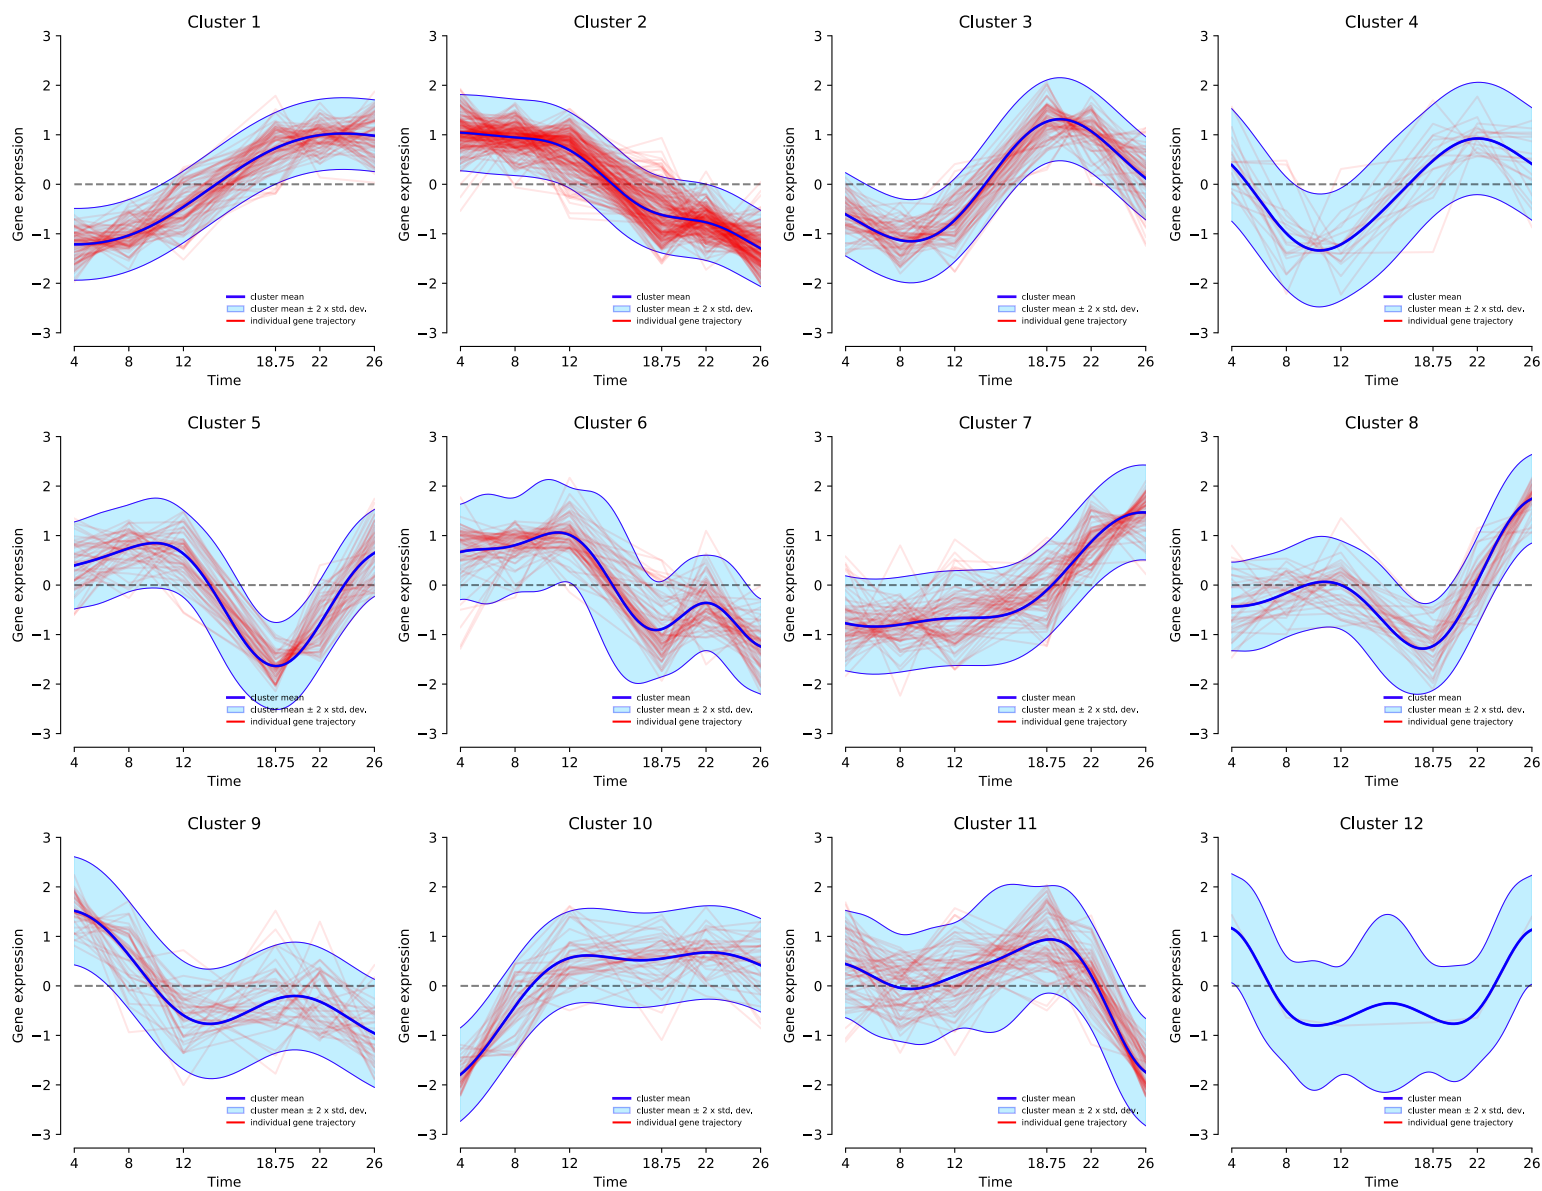

Supplementary Figure 2: Longitudinal clusters of proteomic data of *B. pertussis* culture. X-axis correspond to the time and Y-axis correspond to the protein intensity. Blue line corresponds to the cluster mean, light blue interval corresponds to the cluster mean  $\pm 2$  x standard deviation and red line corresponds to the individual transcript trajectories.
