# Supplementary material for: Deep longitudinal multi-omics analysis of Bordetella pertussis cultivated in bioreactors highlights medium starvations and transitory metabolisms, associated to vaccine antigen biosynthesis variations and global virulence regulation
Source: Front Microbiol. 2023 Feb 14;14:1036386. doi: 10.3389/fmicb.2023.1036386 (PMC9976334; doi:10.3389/fmicb.2023.1036386)
Supplement: Supplementary file 6 [file Table_1.XLSX]

## Sheet: Supplementary Table 1
Supplementary Table 1. RNA-Seq results throughout B. pertussis culture. Gene expression (RLE normalized Log2(counts)) per biological replicates per times points. Gene expression covariance with time, calculated using Longitudinal Gaussian Processes (LGPR). Longitudinal clustering results.
									Normalized Log2(counts) f
Locus tag a	Old locus tag a	Gene name a	Protein name b	Gene product a	Protein function b	Cluster c	Large cluster d	Time covariance e	1h	1h	1h	4h	4h	4h	8h	8h	8h	12h	12h	12h	18.75h	18.75h	18.75h	22h	22h	22h	26h	26h	26h
BP_RS00005	bp0001	mnmG	mnmG, gidA	tRNA uridine-5-carboxymethylaminomethyl(34) synthesis enzyme MnmG	tRNA uridine 5-carboxymethylaminomethyl modification enzyme MnmG (Glucose-inhibited division protein A)	4	A	0.867621	13.0956	13.2539	13.3539	12.585	12.5364	12.545	12.6331	12.574	12.4538	12.5968	12.5032	12.4777	12.5607	12.4417	12.5544	12.2034	12.1031	12.3454	12.1831	11.9641	12.0529
BP_RS00010	bp0002	rsmG	rsmG	16S rRNA (guanine(527)-N(7))-methyltransferase RsmG	Ribosomal RNA small subunit methyltransferase G (EC 2.1.1.170) (16S rRNA 7-methylguanosine methyltransferase) (16S rRNA m7G methyltransferase)	4	A	0.688101	10.9931	11.0452	11.108	11.0242	10.8042	10.6896	10.8559	10.7547	10.8669	11.0393	10.8566	11.0567	11.0902	10.9731	10.7966	10.5677	10.4886	10.6881	10.6668	10.3479	10.3031
BP_RS00015	bp0003	_	parA	ParA family protein	ParA family protein	4	A	0.461928	10.5749	10.74	10.702	10.5693	10.2923	10.217	10.4132	10.2957	10.3545	10.4448	10.2368	10.3062	10.6086	10.4125	10.3761	10.1691	10.1065	10.329	10.2502	10.222	10.1372
BP_RS00020	bp0004	_	_	GNAT family N-acetyltransferase	Putative acetyltransferase, GnaT family	7	A	0.636749	10.313	10.3151	10.3499	9.95161	9.63007	9.58502	9.9391	9.5903	9.56369	9.64071	9.52067	9.59473	9.66335	9.46239	9.57001	9.18407	9.17402	9.15334	9.283	9.26715	8.70343
BP_RS00025	bp0005	_	parB	ParB/RepB/Spo0J family partition protein	Probable chromosome partitioning protein ParB	7	A	0.432665	10.2214	10.4726	10.6059	10.2755	10.4396	10.3867	10.241	10.3955	10.5311	10.5621	10.4951	10.4159	10.5091	10.3281	10.3387	10.1359	10.1362	10.1062	10.2804	10.383	10.4966
BP_RS00030	bp0006	_	_	asparaginase	_	4	A	0.739863	9.76186	9.79414	9.8874	9.22831	9.26003	9.20467	9.27254	9.07028	9.05378	9.0803	9.03574	9.01545	9.00302	9.12996	9.11678	8.84872	8.86353	8.71213	8.66834	8.66429	8.24249
BP_RS00055	bp0007	tuf	tuf1	elongation factor Tu	Elongation factor Tu (EF-Tu)	7	A	0.942246	17.2987	17.3931	17.3399	16.4342	16.5537	16.5337	16.5779	16.5303	16.536	16.7821	16.6267	16.5653	16.3447	16.1002	16.2509	15.5376	15.3617	15.6829	15.7408	15.4618	15.5493
BP_RS00065	bp0008	secE	secE	preprotein translocase subunit SecE	Protein translocase subunit SecE	4	A	0.884811	13.2136	13.0082	12.9139	11.696	11.3934	11.3622	11.6098	11.6187	11.4042	11.6113	11.4286	11.6283	11.3055	11.295	11.4042	10.4222	10.4486	10.6566	10.5518	9.94739	9.64883
BP_RS00070	bp0009	nusG	nusG	transcription termination/antitermination protein NusG	Transcription termination/antitermination protein NusG	7	A	0.903875	15.4669	15.1634	15.0189	14.1921	13.6026	13.6623	14.2727	13.9095	13.8011	13.8167	13.7693	13.8929	13.4298	13.3691	13.4044	12.5713	12.487	12.8262	12.7601	12.1201	11.7437
BP_RS00075	bp0010	rplK	rplK, relC	50S ribosomal protein L11	50S ribosomal protein L11	7	A	0.906012	14.2751	14.3129	14.2773	13.5535	13.5907	13.5876	13.4398	13.5481	13.5433	13.6945	13.6249	13.6024	13.2637	13.005	13.0792	12.6716	12.554	12.7421	12.9429	12.4749	12.1117
BP_RS00080	bp0011	rplA	rplA	50S ribosomal protein L1	50S ribosomal protein L1	7	A	0.917739	13.5771	13.7079	13.8156	12.8163	13.0307	12.9426	12.7388	12.8534	12.9065	13.0239	12.9274	12.8882	12.4403	12.2929	12.433	11.8375	11.802	12.0322	12.1407	11.807	11.4233
BP_RS00085	bp0013	rplJ	rplJ	50S ribosomal protein L10	50S ribosomal protein L10	7	A	0.93972	14.6816	14.8827	14.8989	14.3245	14.3888	14.3422	13.8313	14.1817	14.2945	14.6124	14.5114	14.4203	12.8209	12.6286	12.7245	13.3458	13.1106	13.4845	13.3845	13.1371	13.3258
BP_RS00090	bp0014	rplL	rplL	50S ribosomal protein L7/L12	50S ribosomal protein L7/L12	7	A	0.913288	13.225	13.5467	13.5049	12.8943	13.2869	13.205	12.9474	13.1445	13.0514	13.4301	13.4532	13.1709	12.032	11.7921	12.0035	12.2922	12.0231	12.2433	12.4722	12.3035	12.4781
BP_RS00095	bp0015	rpoB	rpoB	DNA-directed RNA polymerase subunit beta	DNA-directed RNA polymerase subunit beta (RNAP subunit beta) (EC 2.7.7.6) (RNA polymerase subunit beta) (Transcriptase subunit beta)	4	A	0.799029	16.1406	16.1606	16.052	15.2987	15.3693	15.2844	15.0819	15.3813	15.4247	15.7091	15.5038	15.4358	15.3831	15.1589	15.2146	14.5577	14.3227	14.6518	14.9079	14.8047	15.5383
BP_RS00100	bp0016	rpoC	rpoC, tabB	DNA-directed RNA polymerase subunit beta'	DNA-directed RNA polymerase subunit beta' (RNAP subunit beta') (EC 2.7.7.6) (RNA polymerase subunit beta') (Transcriptase subunit beta')	4	A	0.781126	15.5619	15.6743	15.6233	14.9483	15.031	14.9379	14.7731	15.0909	15.132	15.4327	15.2594	15.1737	15.0658	14.8635	14.9456	14.386	14.1549	14.4248	14.6678	14.612	15.2737
BP_RS00105	bp0017	_	_	TssQ family T6SS-associated lipoprotein	Putative lipoprotein	4	A	0.409068	8.58947	8.58736	8.57815	7.8636	7.54071	7.84938	8.09779	7.81396	7.81684	8.10037	8.31098	7.95867	8.31813	8.11046	8.07062	8.00546	7.7452	7.72641	8.00457	7.83058	7.35348
BP_RS00110	bp0018	_	_	membrane protein	Putative membrane protein	3	B	0.591994	9.23096	9.23589	9.36442	9.09209	9.25436	9.24254	9.48795	9.30916	9.32741	9.48872	9.48771	9.46023	9.47295	9.47634	9.48652	9.59148	9.52798	9.41816	9.47609	9.62056	9.57583
BP_RS00115	bp0019	_	_	CHASE2 domain-containing protein	_	10	D	0.894152	9.31229	9.27364	9.34744	8.90207	8.62481	8.72424	8.79682	8.75948	8.60545	8.53793	8.63259	8.50469	9.35448	9.38059	9.29526	8.7442	8.8823	8.79294	8.52312	8.43782	8.43094
BP_RS00120	bp0020	_	_	FecR domain-containing protein	Putative peptidoglycan binding protein	10	D	0.467236	8.59587	8.58479	8.54849	8.68427	8.49176	8.18274	8.54919	8.25378	8.2983	8.35305	8.59159	8.39607	8.85605	8.80369	8.76108	8.62067	8.30227	8.30305	8.37009	8.30157	8.33082
BP_RS00125	bp0021	_	_	response regulator transcription factor	_	10	D	0.577194	8.3529	8.44059	8.19724	8.42079	8.60525	8.50473	8.45184	8.5098	8.44474	8.37456	8.41732	8.29165	8.73196	8.83124	8.78893	8.50129	8.66286	8.41489	8.42389	8.16874	7.68079
BP_RS00130	bp0022	_	_	response regulator transcription factor	Two-component response regulator	1	B	0.827222	6.40462	6.62559	6.47656	6.98775	7.22999	7.34136	7.34552	7.18728	7.17177	7.19071	7.20658	7.14367	8.1678	8.18304	7.83868	7.86048	7.91438	7.77331	7.86347	7.96461	8.20526
BP_RS00135	bp0023	_	_	IS481-like element IS481 family transposase	Transposase	_	_	0.00818571	0.745631	0.752809	0	0.921813	0	0.990808	0	0	0	0	0	0	0	0	0.891281	0.900473	0	0	1.17408	0	0
BP_RS00140	bp0024	_	_	CoA transferase	_	4	A	0.507898	8.19078	7.97597	7.91279	7.78874	7.25073	7.25354	7.72723	6.66519	6.76482	6.75599	6.82045	7.164	7.30245	7.94545	7.47129	7.02004	7.25499	7.25909	6.75428	6.96146	6.27591
BP_RS00145	bp0025	_	_	OB-fold domain-containing protein	Uncharacterized protein	1	B	0.482935	7.55941	7.23214	7.1791	7.48021	7.00316	6.95056	7.41692	7.10271	7.33794	7.35016	6.82339	7.45938	7.5899	7.58766	7.20089	7.64002	7.66264	7.6591	7.86347	7.42586	7.56131
BP_RS00150	bp0026	_	_	thiolase family protein	Putative thiolase	2	B	0.429726	7.17134	7.20568	7.31966	7.41278	7.14198	6.57217	7.03401	6.6122	6.96196	6.8621	6.90072	6.84862	6.90601	7.16521	6.78966	7.00607	7.47235	7.33858	7.47707	7.44997	7.52376
BP_RS00155	bp0027	_	_	MaoC family dehydratase	MaoC family protein	2	B	0.483086	6.27292	6.18028	6.14232	6.25149	5.84298	5.74224	5.92492	5.86194	6.4301	6.19479	5.98509	6.08318	5.56603	6.00275	6.01877	6.74528	6.46537	6.50318	6.44762	6.80742	7.39284
BP_RS00160	bp0028	_	_	LysR family transcriptional regulator	Putative transcriptional regulator	_	_	0.205052	7.7969	7.64642	7.70168	7.63943	7.4367	7.37437	7.44109	7.17798	7.46845	7.32191	7.05528	7.18237	7.72143	7.74682	7.55617	7.59664	7.26498	7.66514	7.52707	7.28489	6.55273
BP_RS00165	bp0029	_	_	enoyl-CoA hydratase/isomerase family protein	Putative enoyl-CoA hydratase	12	_	0.390662	7.56184	7.54579	7.38784	7.09342	7.21781	7.36239	7.47481	7.21569	7.37069	7.3346	7.37542	7.17149	7.5102	8.04058	7.77957	7.58898	7.569	7.4298	7.30434	7.57945	7.48771
BP_RS00170	bp0030	_	_	MmgE/PrpD family protein	Uncharacterized protein	4	A	0.9172	10.8532	10.7787	10.8073	10.151	10.0845	10.3167	9.93393	10.0107	9.95769	9.79145	9.88233	9.81134	10.0057	10.1529	10.1554	9.67304	9.78251	9.7001	9.28921	9.39994	9.10349
BP_RS00175	bp0031	_	_	IS481-like element IS481 family transposase	Transposase	_	_	0.0137907	1.26281	2.1429	1.44705	0.930458	0.978079	1.8708	1.07556	1.50785	0.435155	2.13107	1.9717	1.24884	1.1175	1.92615	1.90961	1.17018	2.5493	0.886454	1.8127	0.975138	2.40153
BP_RS00180	bp0032	_	_	MFS transporter	Probable transporter	4	A	0.758354	8.70608	8.58803	8.64696	8.27422	8.21353	8.19302	8.28642	8.11699	8.05698	7.96338	8.1588	8.13147	7.64484	8.06986	8.00198	7.76599	7.59653	7.59553	7.47707	7.23039	6.53158
BP_RS00185	bp0033	glyQ	glyQ	glycine--tRNA ligase subunit alpha	Glycine--tRNA ligase alpha subunit (EC 6.1.1.14) (Glycyl-tRNA synthetase alpha subunit) (GlyRS)	7	A	0.787076	12.1948	12.1389	12.1087	11.7628	11.2272	11.2575	11.5777	11.6961	11.6278	11.9532	11.8525	11.9155	11.5042	11.4781	11.5735	10.8534	10.8735	11.1332	10.9592	10.3821	9.4701
BP_RS00190	bp0034	_	glyS	glycine--tRNA ligase subunit beta	Glycine--tRNA ligase beta subunit (EC 6.1.1.14) (Glycyl-tRNA synthetase beta subunit) (GlyRS)	4	A	0.895802	12.8856	12.897	12.9344	12.3079	12.3816	12.3856	12.4401	12.4649	12.4608	12.4376	12.3784	12.3685	12.2667	12.1771	12.2217	11.5601	11.4426	11.7629	11.663	11.3579	10.7635
BP_RS00195	bp0035	gmhB	_	D-glycero-beta-D-manno-heptose 1%2C7-bisphosphate 7-phosphatase	D,D-heptose 1,7-bisphosphate phosphatase (EC 3.1.3.-)	4	A	0.87625	10.4236	10.5018	10.5072	9.76752	9.69834	9.68485	9.46182	9.59982	9.59431	9.47623	9.51486	9.51011	9.29244	9.31862	9.472	8.64791	8.52835	9.09899	8.66944	8.36784	8.1704
BP_RS00200	bp0036	_	_	1-acyl-sn-glycerol-3-phosphate acyltransferase	Probable acyltransferase	4	A	0.94114	10.8058	10.9179	10.887	10.3699	10.271	10.1292	9.96419	9.88527	9.96995	9.99786	9.95935	10.0969	9.4328	9.72474	9.70486	9.02559	9.0609	9.28436	9.09351	8.95276	8.85238
BP_RS00205	bp0037	_	_	M48 family metallopeptidase	DUF45 domain-containing protein	4	A	0.852496	10.4416	10.3616	10.4061	10.1711	10.2773	10.1631	9.89007	10.049	10.0467	9.77253	9.80767	9.85059	9.92501	10.1713	10.1047	9.39933	9.3523	9.44539	9.24765	9.25081	9.64637
BP_RS00210	bp0038	gloA	gloA	lactoylglutathione lyase	Lactoylglutathione lyase (EC 4.4.1.5) (Glyoxalase I)	9	D	0.674083	10.8603	11.0096	10.9371	11.1929	11.4674	11.3921	11.4492	11.4711	11.4327	11.68	11.4856	11.4041	11.9609	11.8285	11.7272	11.5568	11.392	11.4467	11.6522	11.5646	11.8983
BP_RS00215	bp0039	_	def1	peptide deformylase	Peptide deformylase 1 (PDF 1) (EC 3.5.1.88) (Polypeptide deformylase 1)	_	_	0.036244	9.67182	9.94491	9.92808	10.0089	10.0913	10.0525	10.0715	10.1584	10.149	10.2146	10.1217	10.0669	10.2605	10.2428	10.1775	10.213	9.94497	10.1628	10.0556	10.1192	10.2996
BP_RS00220	bp0040	fadE	_	acyl-CoA dehydrogenase	_	11	_	0.335186	5.58002	5.81994	5.99389	6.63509	6.46411	6.76078	6.63766	6.56915	6.2821	5.72065	6.48612	6.33694	6.37294	6.13828	6.49418	6.73788	6.50443	6.4952	5.91455	6.15998	5.25265
BP_RS00225	bp0041	_	_	IS481-like element IS481 family transposase	Transposase	_	_	0.0206929	0.503885	0.752809	0.716075	0.749507	1.1392	0.468096	1.1188	0.942552	1.11405	0.525307	0	0	0	0.936332	0	0	0	0	0.925072	1.02927	0
BP_RS00230	bp0042	_	_	alpha/beta fold hydrolase	_	9	D	0.581188	4.85381	5.62977	6.00029	6.40582	6.35003	6.30993	6.03212	6.28347	6.24427	6.01746	6.25758	6.18146	6.79379	6.50046	6.83339	6.92867	6.6847	6.67883	6.45447	6.44959	6.36437
BP_RS00235	bp0043	_	_	hypothetical protein	Putative exported protein	_	_	0.103139	7.84555	7.66985	7.97531	7.4982	7.9088	7.62079	7.54742	7.70344	7.75887	7.75335	7.88202	7.69377	7.90503	7.93448	7.79219	7.79484	7.7448	7.54573	7.50493	7.73985	7.65665
BP_RS00240	bp0044	_	_	helix-turn-helix domain-containing protein	Transcriptional regulator	_	_	0.0979158	5.7669	5.55151	5.72233	5.42765	5.58199	5.49471	5.39259	6.16969	5.70552	5.24456	5.26369	5.77303	5.92967	5.41483	6.02971	5.70415	5.83899	5.36568	4.86044	5.41043	4.93328
BP_RS00245	bp0045	_	_	AEC family transporter	Putative membrane protein	9	D	0.673399	7.61249	7.34586	7.58977	7.56547	7.58723	7.56284	7.606	7.64191	7.62688	7.40766	7.47014	7.51332	7.96952	8.22291	8.2258	7.57788	7.38222	7.65934	7.45967	7.50057	7.26657
BP_RS00250	bp0046	_	_	Ldh family oxidoreductase	_	1	B	0.298667	7.98093	8.11655	8.14269	8.80257	9.26849	9.1631	9.00811	9.09156	9.28416	8.95726	9.18747	9.07471	9.47219	9.55639	9.40269	9.36375	9.25867	9.28972	9.418	9.35384	8.98025
BP_RS00255	bp0047	_	metXS	homoserine O-acetyltransferase	Homoserine O-succinyltransferase (HST) (EC 2.3.1.46) (Homoserine transsuccinylase) (HTS)	7	A	0.790385	10.4779	10.3773	10.2299	9.31882	9.17291	9.11309	8.95146	8.95441	8.83048	8.72554	8.93376	8.71238	9.22303	9.13673	9.37281	8.45142	8.60167	8.43105	8.72941	8.5735	8.39509
BP_RS00260	bp0048	metW	_	methionine biosynthesis protein MetW	Uncharacterized protein	10	D	0.526196	8.63815	8.59694	8.40686	8.22336	8.41008	8.302	7.907	7.96177	8.17447	8.1342	8.01549	7.81615	8.67209	8.53977	8.39271	7.80458	7.98056	7.9659	7.72937	7.69225	7.71059
BP_RS00270	bp0049	_	_	IS481-like element IS481 family transposase	Transposase	_	_	0.00115993	4.49102	4.94483	5.10649	5.13179	5.11573	4.75047	5.63796	5.27795	6.09097	5.07741	4.86111	5.30647	5.30743	4.46036	4.91377	5.05398	5.22502	5.09821	5.01847	5.06076	5.43362
BP_RS00275	bp0050	ampG	ampG	muropeptide transporter	Putative integral membrane signal transducer protein	_	_	0.240847	7.69631	7.31516	7.41106	7.03466	7.15747	7.22604	7.00414	6.70792	6.82271	6.99901	6.96244	6.99764	7.31486	7.40007	7.1969	7.17193	7.3324	7.18298	6.90605	6.89413	7.46117
BP_RS00280	bp0051	_	_	porin	_	4	A	0.811372	11.7758	11.8079	11.7964	12.1282	12.1508	12.0358	11.8732	11.9978	11.9617	12.1705	12.2064	12.1196	11.3175	11.1277	11.0247	12.0421	11.8152	11.868	11.9335	11.5528	11.0232
BP_RS00285	bp0053	_	_	aspartate/glutamate racemase family protein	Putative aspartate/glutamate racemase	_	_	0.0156709	6.63944	6.85058	6.70064	6.60026	6.54125	6.71611	6.35436	6.42433	6.55021	6.39274	6.70814	6.43201	6.32389	6.25947	6.04932	6.5281	6.65101	6.6768	6.57359	6.881	6.30572
BP_RS00290	bp0054	_	_	amino acid ABC transporter ATP-binding protein	_	3	B	0.63999	6.56379	7.01636	7.00288	6.99009	6.8109	6.66132	6.98148	7.09609	6.86144	6.64691	6.87653	6.83128	6.99763	7.14927	6.96015	7.35659	7.569	7.57928	7.4147	7.41773	7.95432
BP_RS00295	bp0055	_	gltK	ABC transporter permease subunit	Glutamate/aspartate transport system permease protein	_	_	0.185608	6.64051	6.68756	6.4578	6.33454	6.01653	6.40592	6.23277	6.14946	6.24359	5.98304	6.15249	5.91341	5.64753	6.27694	5.94702	6.78385	6.45968	6.18828	6.50396	6.92191	6.5071
BP_RS00300	bp0056	_	gltJ	amino acid ABC transporter permease	Glutamate/aspartate transport system permease protein	5	C	0.423058	5.39144	5.50873	5.54325	5.01379	5.0446	5.13558	4.75077	5.16803	4.67272	5.35775	5.38929	5.27176	4.67647	4.71169	5.16683	5.4128	6.14092	5.82481	6.186	6.45488	6.69265
BP_RS00305	bp0057	_	_	amino acid ABC transporter substrate-binding protein	Amino-acid ABC transporter binding protein	5	C	0.461411	5.82007	6.18849	5.9648	5.47891	5.65267	5.78326	5.74751	5.55754	5.23823	5.51061	5.6693	6.06764	5.43507	5.36243	5.45092	6.22445	5.85464	6.01894	6.45447	6.50497	7.0156
BP_RS00315	bp0059	_	_	LysR family transcriptional regulator substrate-binding protein	_	12	_	0.675293	7.59609	7.55567	7.69564	7.31768	6.87788	7.04614	7.48713	7.04345	6.94429	6.76826	6.74385	7.0267	7.59119	8.11335	7.99757	7.50199	7.75766	7.22385	7.05454	7.38476	7.11076
BP_RS00320	bp0060	_	_	type II toxin-antitoxin system HipA family toxin	HipA_C domain-containing protein	10	D	0.789401	9.76741	10.2044	10.2827	10.0475	9.90277	9.91035	10.4244	10.22	10.1479	10.5305	10.3855	10.4647	10.7564	10.6924	10.6709	10.2602	10.2364	10.2886	10.2789	9.97085	9.52282
BP_RS00325	bp0061	_	_	helix-turn-helix domain-containing protein	Putative DNA-binding protein	10	D	0.577948	8.93431	9.33508	9.45036	9.14319	8.84254	8.75084	9.52742	9.33372	9.29971	9.70582	9.57321	9.3838	9.79048	9.46423	9.6366	9.23683	9.19637	9.2278	9.42554	8.85984	7.92337
BP_RS00330	bp0062	_	_	hypothetical protein	Uncharacterized protein	11	_	0.404383	9.04716	9.10081	9.24374	9.09681	8.45019	8.12374	9.26346	8.6383	8.5648	9.14885	8.89295	8.7907	8.97813	9.15254	8.96587	8.87235	8.9777	8.8617	8.88527	8.40853	8.03761
BP_RS00340	bp0063	_	_	tripartite tricarboxylate transporter substrate binding protein	Uncharacterized protein	2	B	0.828437	9.87344	9.70734	9.68115	9.77193	9.71449	9.61271	10.0308	9.85439	9.79655	9.76018	9.57064	9.65262	9.95109	9.76186	9.70813	10.3759	10.3072	10.2975	10.4324	10.3126	11.0402
BP_RS00335	bp0063A	_	_	transposase	Putative transposase (Partial) (Fragment)	12	_	0.4395	5.3785	5.44209	5.05432	5.36429	4.48159	4.04439	4.74289	3.45766	4.59727	4.15243	3.66552	4.78892	5.6468	5.705	5.23869	4.83332	5.45525	5.05519	4.63653	5.0388	5.0807
BP_RS00345	bp0064	_	_	DJ-1/PfpI family protein	DJ-1_PfpI domain-containing protein	5	C	0.944697	9.73292	9.55841	9.4767	10.1913	10.2588	10.1764	10.5161	10.4911	10.5405	10.781	10.5368	10.6374	9.88498	9.77375	9.86271	11.1575	11.0714	11.0806	11.3015	11.3894	12.0603
BP_RS00350	bp0065	_	_	Rieske 2Fe-2S domain-containing protein	Putative ferredoxin	5	C	0.721544	8.55162	8.51626	8.34176	8.85445	8.15387	8.00896	8.87188	8.44316	8.44141	8.76498	8.13232	8.4874	7.82919	7.81995	8.18511	8.88673	9.07179	9.10567	8.98907	8.92674	9.59522
BP_RS00355	bp0066	_	_	2Fe-2S iron-sulfur cluster binding domain-containing protein	Oxidoreductase	5	C	0.943412	9.37814	9.28634	9.27124	9.68168	9.63374	9.58217	10.0373	9.98389	9.97721	10.2499	10.0401	10.1493	9.69549	9.57379	9.59257	10.5054	10.4683	10.5584	10.5362	10.4264	10.593
BP_RS00360	bp0067	_	_	TRAP transporter large permease	Integral membrane protein	3	B	0.915679	8.34373	8.42919	8.24929	8.76727	8.85798	8.55076	9.25605	9.13649	9.12547	9.48779	9.32633	9.27711	8.89377	8.52995	8.63628	9.95489	9.79241	9.7698	10.1574	10.178	10.912
BP_RS00365	bp0068	_	_	TRAP transporter small permease	_	3	B	0.949044	7.73823	7.69492	7.59359	8.00464	7.81914	8.06696	8.33671	8.47378	8.33639	8.36668	8.46655	8.19306	8.7889	8.58772	8.67206	9.50464	9.45838	9.42084	9.62115	9.6099	10.2187
BP_RS00370	bp0069	_	_	TRAP transporter substrate-binding protein	Putative exported protein	5	C	0.940107	9.6376	9.75832	9.60987	9.97387	9.73748	9.62581	10.2187	9.94083	9.88259	10.1106	9.90762	10.0578	9.86069	9.72785	9.78956	10.8497	10.6801	10.8923	11.2321	11.3053	11.9577
BP_RS00375	bp0070	_	_	hydroxylase	_	_	_	0.172927	7.69708	7.78358	7.76848	7.74677	7.28984	7.13393	7.21557	7.35738	7.16016	7.15304	6.92856	6.90113	7.55576	7.22323	7.1126	7.27557	7.57404	7.3659	7.99127	7.48927	6.84541
BP_RS00385	bp0072	_	_	DUF1153 domain-containing protein	Transposase	2	B	0.250804	8.02904	7.9665	7.98993	8.393	8.59205	8.77885	8.81296	8.78479	8.58506	8.54418	8.05726	8.35387	8.66861	8.81252	8.66309	8.59291	8.67608	8.9051	8.57073	8.6153	8.75561
BP_RS00390	bp0073	_	_	IS3 family transposase	_	4	A	0.796246	8.90379	8.78254	8.83176	9.09126	8.83292	8.91197	8.95118	8.93647	8.82561	8.71239	8.694	8.69185	8.81431	8.8271	8.67935	8.54228	8.70595	8.64004	8.12269	8.10484	8.38854
BP_RS00400	bp0074	htpG	htpG	molecular chaperone HtpG	Chaperone protein HtpG (Heat shock protein HtpG) (High temperature protein G)	8	_	0.947611	11.1612	11.1404	11.6164	12.2588	12.9109	12.9046	14.1103	14.1386	14.1597	14.5431	14.274	14.257	13.3642	13.2606	13.441	14.2687	14.0871	14.3035	14.1529	13.988	13.8573
BP_RS00405	bp0075	_	_	glutathione S-transferase	Probable glutathione S-transferase	8	_	0.863747	9.12208	9.1915	9.43261	9.95939	10.3963	10.4552	10.8678	10.8948	10.9653	10.9172	10.9302	10.9078	10.3883	10.3458	10.4309	10.7971	10.704	10.7808	10.5834	10.5982	10.5445
BP_RS00410	bp0076	ampD	ampD	1%2C6-anhydro-N-acetylmuramyl-L-alanine amidase AmpD	N-acetylmuramoyl-L-alanine amidase	8	_	0.584474	8.81429	8.92167	8.9853	9.19852	9.07618	9.1021	9.37538	9.3534	9.25956	9.46126	9.46998	9.3919	9.29478	9.37457	9.2565	9.07146	9.02998	8.96821	9.1344	8.82339	7.95432
BP_RS00415	bp0077	_	_	hypothetical protein	Putative exported protein	9	D	0.490357	7.22973	7.4116	7.48501	7.60842	7.7442	7.85527	7.81479	7.74743	7.75854	7.49064	7.4041	7.61984	8.04539	8.13463	8.17103	7.97499	7.9035	7.91892	7.79506	7.76504	7.33481
BP_RS00420	bp0078	ccsA	_	cytochrome c biogenesis protein CcsA	Putative membrane protein	4	A	0.618446	11.0217	10.9735	10.9605	10.6926	10.5514	10.5399	10.4488	10.4995	10.5537	10.4629	10.6021	10.653	10.4699	10.4696	10.5492	10.3821	10.3507	10.2041	10.3305	9.93287	9.44624
BP_RS00425	bp0079	ffh	ffh	signal recognition particle protein	Signal recognition particle protein (Fifty-four homolog)	4	A	0.791238	11.6785	11.768	11.6894	11.4672	11.5205	11.5075	11.3625	11.4647	11.518	11.5265	11.5033	11.4922	11.773	11.6546	11.668	11.1277	11.0768	11.0723	11.2309	10.9909	10.5047
BP_RS00435	bp0081	_	_	IS481 family transposase	_	10	D	0.347885	8.70269	8.71612	8.881	7.96766	8.13295	7.82573	8.25538	8.00549	7.94452	7.84637	7.32869	8.10213	8.12539	8.36039	8.21236	6.87203	7.15543	7.20762	7.43934	7.15045	6.81216
BP_RS00440	bp0082	wlbL	bplL	O-antigen biosynthesis protein WlbL	Lipopolysaccharide biosynthesis protein	4	A	0.771832	11.047	10.9424	10.8822	10.493	10.4979	10.4638	10.5299	10.543	10.3837	10.3989	10.3798	10.4356	10.5586	10.6121	10.5131	10.1294	10.2766	10.185	10.0873	9.84089	9.34897
BP_RS00445	bp0083	_	_	hypothetical protein	_	10	D	0.688458	9.97522	9.85483	9.97009	9.2231	9.40297	9.5148	9.26568	9.24533	9.29259	9.20292	9.13242	9.38786	9.69509	10.0719	9.8752	9.38515	9.60393	9.48461	9.06548	9.39406	9.20714
BP_RS00450	bp0085	wlbI	bplI	O-antigen biosynthesis protein WlbI	Lipopolysaccharide biosynthesis protein	7	A	0.52535	9.90836	9.88606	9.82791	9.41984	9.07224	9.1201	9.43716	9.12217	8.9783	8.88528	8.93563	9.07276	9.17478	9.33956	9.34198	9.22225	9.02799	9.16116	9.0453	8.84203	8.82539
BP_RS00455	bp0086	wlbH	bplH	O-antigen biosynthesis protein WlbH	Putative glycosyl transferase	4	A	0.468473	10.9974	11.0035	10.9609	10.7104	10.2305	10.029	10.3078	10.1966	10.2135	10.1335	10.1283	10.234	10.1127	10.1884	10.1462	10.1359	10.1272	10.301	9.92076	9.90452	9.85097
BP_RS00460	bp0087	wlbG	bplG	O-antigen biosynthesis protein WlbG	Probable sugar transferase	7	A	0.66896	9.45675	9.49138	9.47423	9.58249	9.26567	9.09172	9.08372	8.94904	9.03125	8.94354	8.86308	8.93563	8.88131	8.78657	8.6513	8.57507	8.6402	8.93635	8.84035	8.58136	8.529
BP_RS00465	bp0088	wlbF	bplF	O-antigen biosynthesis aminotransferase WlbF	Lipopolysaccharide biosynthesis protein	3	B	0.684413	11.1633	11.1581	11.1662	11.3955	11.4875	11.4777	11.3946	11.3597	11.427	11.4955	11.455	11.5032	11.3738	11.581	11.5189	11.6713	11.5228	11.7201	11.7949	11.856	11.8425
BP_RS00470	bp0089	wlbE	bplE	O-antigen biosynthesis protein WlbE	Probable glycosyl transferase	4	A	0.932355	9.88527	10.0528	9.93568	9.53692	9.71742	9.57125	9.75267	9.58301	9.59062	9.45838	9.5089	9.41149	8.93857	8.86377	8.81507	8.71813	8.71431	8.83223	8.62504	8.43282	8.58153
BP_RS00475	bp0090	wlbD	bplD	O-antigen biosynthesis protein WlbD	UDP-N-acetylglucosamine 2-epimerase	7	A	0.890208	10.8858	10.9472	10.9181	10.8574	10.6684	10.744	10.7275	10.829	10.7655	10.8202	10.8209	10.7338	10.2627	10.2155	10.31	10.0328	10.0563	10.3446	10.1316	9.80321	10.1044
BP_RS00480	bp0091	wlbC	bplC	O-antigen biosynthesis protein WlbC	Lipopolysaccharide biosynthesis protein	7	A	0.834495	11.5363	11.473	11.5406	11.2094	11.3328	11.3196	11.4318	11.3994	11.4074	11.5207	11.4421	11.4524	11.1172	11.1071	11.1648	10.9321	10.8768	11.1964	10.9015	10.7534	10.9351
BP_RS00485	bp0092	wlbB	bplB	O-antigen biosynthesis protein WlbB	Probable acetyltransferase	7	A	0.812518	9.94977	9.97068	10.0442	9.66974	9.67468	9.58831	9.61194	9.66913	9.60088	9.85386	9.65741	9.66735	9.56863	9.24955	9.44064	9.33302	9.20703	9.41244	9.10531	8.70818	8.58799
BP_RS00490	bp0093	wlbA	bplA	O-antigen biosynthesis protein WlbA	Probable oxidoreductase	7	A	0.788901	11.4138	11.5316	11.5074	11.3059	11.2979	11.2966	11.279	11.3581	11.2579	11.5095	11.4788	11.4215	11.3089	11.2533	11.4018	10.9885	10.9354	11.1162	10.8905	10.6662	9.95895
BP_RS00495	bp0094	waaC	rfaC	lipopolysaccharide heptosyltransferase I	Probable heptosyltransferase	10	D	0.477166	9.20149	9.25224	9.27487	9.14917	9.23809	9.23377	9.18522	9.29037	9.30393	9.38921	9.30205	9.49367	9.74746	9.31233	9.40518	9.24535	9.15963	9.22709	9.26623	9.05846	8.69228
BP_RS00500	bp0095	_	kdtA	3-deoxy-D-manno-octulosonic acid transferase	3-deoxy-D-manno-octulosonic acid transferase (Kdo transferase) (EC 2.4.99.12) (Lipid IV(A) 3-deoxy-D-manno-octulosonic acid transferase)	7	A	0.752467	9.25162	9.04578	9.16967	8.71258	8.98667	8.92261	8.79682	8.78384	8.66996	8.67945	8.86006	8.6195	8.79849	8.93428	8.84293	8.44031	8.5896	8.46618	8.23454	8.14536	7.78491
BP_RS19490	bp0096	_	_	hypothetical protein	Putative exported protein	_	_	0.132554	6.8956	6.80341	6.92219	6.15311	6.8685	6.77178	7.00414	6.79063	6.7324	6.56217	6.76983	6.06302	7.04447	6.65232	6.94398	5.92991	6.32686	5.80499	6.11493	6.64232	7.07526
BP_RS00505	bp0097	_	coaX, baf	type III pantothenate kinase	Type III pantothenate kinase (EC 2.7.1.33) (Bvg accessory factor) (PanK-III) (Pantothenic acid kinase)	4	A	0.765142	10.245	10.1824	10.1878	9.45107	9.31008	9.43159	9.39506	9.46031	9.24187	9.32898	9.41957	9.60559	9.31851	9.40713	9.47481	8.8032	8.7848	8.7695	8.92483	8.84928	8.36708
BP_RS00510	bp0098	_	birA	biotin--[acetyl-CoA-carboxylase] ligase	Biotin--[biotin carboxyl-carrier protein] ligase (EC 6.3.4.15)	4	A	0.700928	11.097	10.9256	11.0167	10.2627	9.90065	9.93881	10.0384	10.0452	9.86789	10.0182	10.1606	10.2087	9.92633	9.97968	9.95402	9.41572	9.50759	9.47829	9.44802	9.43941	8.92851
BP_RS00515	bp0099	_	_	ABC transporter permease	Putative integral membrane protein	7	A	0.852881	9.08732	9.12048	9.2442	9.23048	9.39004	9.38392	9.33695	9.37875	9.32033	9.08202	9.03002	9.05617	8.75648	8.87069	8.88099	8.84029	9.00521	9.00672	8.72788	8.70527	8.86891
BP_RS00520	bp0100	_	_	ATP-binding cassette domain-containing protein	Probable ATP-binding component of ABC transporter	11	_	0.398047	8.3515	8.50998	8.42443	8.63909	8.78119	8.57716	8.73104	8.65699	8.52792	8.75122	8.79556	8.72981	8.65108	8.46443	8.33386	8.48124	8.50836	8.58076	8.52807	8.46155	8.07197
BP_RS00525	bp0101	_	_	MCE family protein	_	5	C	0.263192	8.14398	8.29753	8.37715	8.78262	8.65341	8.66629	8.55505	8.83716	8.57541	8.58657	8.99838	8.61444	8.47422	8.46699	8.41767	8.63151	8.46013	8.73326	8.63225	8.54965	9.26914
BP_RS00530	bp0101A	_	_	membrane integrity-associated transporter subunit PqiC	Putative exported protein	8	_	0.264482	7.10494	7.42851	7.63934	8.07222	8.21806	8.04774	8.03207	8.24314	8.36549	7.99473	8.1588	8.41361	8.06054	7.77762	8.02523	8.35218	8.14636	8.25437	8.07229	8.17453	8.82369
BP_RS00535	bp0101B	_	_	alpha/beta hydrolase	Uncharacterized protein	4	A	0.801937	10.0097	10.0341	10.135	10.1895	10.0526	10.1297	10.1138	9.99527	10.1401	10.1337	9.95953	10.0323	9.66631	9.74304	9.68399	9.68826	9.63105	9.81672	9.79521	9.7011	9.90914
BP_RS00540	bp0102	_	_	D-alanyl-D-alanine carboxypeptidase	Serine-type D-Ala-D-Ala carboxypeptidase (EC 3.4.16.4)	4	A	0.547712	13.3554	13.4599	13.4185	13.2553	13.0906	13.1303	12.9911	13.1211	13.1205	13.3244	13.1285	13.2089	13.1575	13.0022	13.1274	12.8207	12.6895	12.922	13.1018	13.0644	12.7109
BP_RS00545	bp0103	_	_	D-amino acid aminotransferase	Probable class IV aminotransferase	10	D	0.774597	11.2144	11.4682	11.6286	11.2883	11.386	11.3457	11.1263	11.2282	11.3238	11.4901	11.3771	11.3304	11.6213	11.3948	11.5527	10.9841	11.0093	11.04	11.2533	11.1651	11.1556
BP_RS00550	bp0104	_	_	YbeD family protein	UPF0250 protein BP0104	10	D	0.726562	9.2672	9.29731	9.42283	9.11236	9.23627	9.1106	9.43716	9.1117	9.28925	9.04484	8.94521	8.97957	9.62243	9.6012	9.6395	9.04237	9.03552	9.03071	9.41231	9.37075	9.8277
BP_RS00555	bp0105	lipB	lipB	lipoyl(octanoyl) transferase LipB	Octanoyltransferase (EC 2.3.1.181) (Lipoate-protein ligase B) (Lipoyl/octanoyl transferase) (Octanoyl-[acyl-carrier-protein]-protein N-octanoyltransferase)	4	A	0.72487	9.47645	9.56476	9.57438	9.47779	9.60013	9.5336	9.46899	9.41036	9.50312	9.15062	9.27054	9.31502	9.35448	9.26224	9.22113	8.84383	8.86682	8.97415	9.09351	8.90123	8.90747
BP_RS00560	bp0106	lipA	lipA	lipoyl synthase	Lipoyl synthase (EC 2.8.1.8) (Lip-syn) (LS) (Lipoate synthase) (Lipoic acid synthase) (Sulfur insertion protein LipA)	10	D	0.840752	11.7664	11.8448	11.8289	11.961	11.9149	11.8822	11.7328	11.8149	11.8693	11.9214	11.7925	11.8523	12.399	12.1795	12.2516	11.7469	11.607	11.7473	11.8117	11.5443	11.2685
BP_RS00565	bp0107	rfbC	rfbC	dTDP-4-dehydrorhamnose 3%2C5-epimerase	dTDP-4-dehydrorhamnose 3,5-epimerase (EC 5.1.3.13) (Thymidine diphospho-4-keto-rhamnose 3,5-epimerase)	12	_	0.728771	9.39269	9.30004	9.30889	9.32722	9.07939	9.13412	9.18602	8.90794	8.99931	8.79496	8.86294	8.80409	9.3418	9.53292	9.42909	9.27066	9.04258	9.09003	9.3002	9.56016	9.97114
BP_RS00570	bp0108	rfbD	rfbD	dTDP-4-dehydrorhamnose reductase	dTDP-4-dehydrorhamnose reductase (EC 1.1.1.133)	10	D	0.629322	9.20868	9.24088	9.1871	9.28597	9.30903	9.23259	8.90751	8.90507	9.08279	8.95176	8.90998	8.9575	9.39295	9.24248	9.24031	8.9813	8.80059	8.81081	8.51326	8.82931	9.20714
BP_RS00575	bp0109	rfbB	rfbB	dTDP-glucose 4%2C6-dehydratase	dTDP-glucose 4,6-dehydratase (EC 4.2.1.46)	12	_	0.481265	11.094	11.1058	11.0291	10.9807	10.9742	11.0073	10.9877	10.8913	10.8198	10.6595	10.5273	10.6649	11.0366	11.1586	11.1795	10.8422	10.9097	11.0095	10.6534	10.95	11.4671
BP_RS00580	bp0110	_	_	IS481-like element IS481 family transposase	Transposase	_	_	0.0107578	7.6369	7.7791	7.88847	7.76119	7.75442	7.89841	8.10417	5.6128	8.24422	7.55029	7.75984	7.82493	6.95208	7.40108	7.37073	7.85998	8.05704	8.19102	7.94261	8.32776	8.51446
BP_RS00585	bp0111	_	_	LysE family translocator	_	_	_	0.0514406	7.73742	7.79622	7.69456	7.76466	7.76961	8.001	7.5401	7.4473	7.71523	7.4291	7.39522	7.76096	7.71208	7.88148	7.64031	7.57788	7.96815	7.5258	7.29283	7.66785	7.69079
BP_RS00590	bp0112	metC	metC	cystathionine beta-lyase	Cystathionine beta-lyase (EC 4.4.1.8)	9	D	0.965633	9.56241	9.82551	9.90656	9.81755	9.90423	9.96509	10.1307	10.1054	10.1662	10.343	10.2219	10.2582	11.0002	10.8949	11.0741	10.6082	10.5501	10.5266	10.2949	10.4073	10.3031
BP_RS00595	bp0113	dsbA	dsbA	thiol:disulfide interchange protein DsbA/DsbL	Thiol:disulfide interchange protein DsbA	3	B	0.949326	12.061	12.2944	12.335	12.5351	12.8791	12.8532	12.6095	12.8175	12.945	13.1536	13.0606	13.071	14.1703	13.9256	14.0021	13.4745	13.3658	13.4294	13.8645	13.9507	14.3087
BP_RS00600	bp0114	_	_	SPOR domain-containing protein	Putative exported protein	7	A	0.645804	11.112	10.9769	10.8814	10.6006	10.3158	10.3064	10.2563	10.2794	10.2272	10.255	10.3186	10.3183	10.2238	10.2649	10.2834	9.94351	9.97279	10.1908	10.0114	9.8111	9.91861
BP_RS00605	bp0115	_	argS	arginine--tRNA ligase	Arginine--tRNA ligase (EC 6.1.1.19) (Arginyl-tRNA synthetase) (ArgRS)	4	A	0.784845	12.905	12.772	12.6982	12.4697	12.3214	12.2882	12.22	12.2245	12.2515	12.3269	12.3042	12.2997	12.5503	12.5614	12.5065	12.2812	12.1541	12.2812	12.3367	12.2484	12.3034
BP_RS00610	bp0116	_	_	DUF1840 domain-containing protein	Uncharacterized protein	1	B	0.714804	9.84806	9.91627	10.1665	10.6158	11.5624	11.6187	11.3591	11.299	11.3917	11.2449	11.1191	11.1142	11.5489	11.5739	11.6447	11.9914	11.9012	11.7463	11.9259	12.1581	12.7807
BP_RS00615	bp0117	_	_	hypothetical protein	Uncharacterized protein	2	B	0.790832	8.2454	8.36859	8.29166	8.76466	8.85921	8.83585	8.86813	8.65119	8.78983	8.54697	8.73476	8.61444	9.14755	9.20756	9.19975	9.36571	9.27533	9.24629	9.38141	9.55572	10.1428
BP_RS00620	bp0118	_	_	IS110-like element IS1663 family transposase	Transposase for IS1663	3	B	0.709474	7.58046	7.03903	6.92577	6.85955	6.62073	6.65212	6.65235	6.82234	6.42563	6.64085	6.96215	6.33694	7.65467	7.66527	7.41024	7.91334	8.12972	7.38521	7.90002	8.06897	7.56597
BP_RS00625	bp0119	_	_	carbohydrate ABC transporter permease	Inner membrane component of binding-protein-dependent transport system	5	C	0.939309	7.89404	7.98697	8.11564	8.30252	8.29312	8.1606	8.18575	7.97063	8.1603	7.9649	7.77655	7.79842	7.19025	7.2051	6.73725	8.78575	8.92105	8.94502	8.87936	8.95053	9.18369
BP_RS00630	bp0120	_	_	sugar ABC transporter permease	Inner membrane component of binding-protein-dependent transport system	5	C	0.978759	8.37365	8.80186	8.82811	9.26276	9.27782	9.1374	9.11287	9.18244	9.14988	9.0976	9.06911	9.10921	7.67404	7.85326	7.93811	10.0508	9.91686	10.0272	10.1979	10.219	10.4968
BP_RS00635	bp0121	_	_	ABC transporter substrate-binding protein	Probable extracellular solute-binding protein	5	C	0.976385	9.74023	10.2192	10.3315	10.7845	11.0805	11.0755	10.8413	11.1383	11.2181	11.3008	11.0186	11.0478	10.1538	10.1719	10.157	12.4561	12.4061	12.4161	12.7875	12.9816	13.5594
BP_RS00640	bp0122	_	_	ABC transporter ATP-binding protein	Sugar ABC transporter, ATP-binding protein	5	C	0.984089	9.28559	9.53468	9.63932	9.237	9.4604	9.4396	9.6503	9.511	9.61763	9.526	9.47984	9.33739	7.85169	8.07964	8.19227	10.4933	10.4162	10.6061	10.5679	10.529	10.6998
BP_RS00645	bp0123	_	_	phosphodiesterase	Putative cAMP phosphodiesterase	3	B	0.873204	7.85483	7.96022	7.80182	8.20215	7.90422	8.16662	8.24454	8.12734	8.13896	8.16434	8.21222	8.261	8.24193	8.3439	8.32562	8.75918	8.74144	8.75806	8.77977	8.77892	9.08909
BP_RS00655	bp0125	_	_	ABC transporter ATP-binding protein	_	2	B	0.452825	7.03231	7.14622	7.01009	7.49477	6.96425	7.29902	6.70046	6.81824	6.78263	6.77961	6.80796	6.70723	7.17208	7.36068	7.08848	7.32012	7.55278	7.27241	7.43579	6.85143	7.42618
BP_RS00660	bp0126	_	_	ABC transporter permease subunit	ABC transporter, permease protein	2	B	0.610995	6.60787	6.2038	6.11808	6.15311	5.30316	5.95326	6.02337	5.99302	5.72475	5.51124	5.44673	5.34037	6.33163	6.13828	5.73184	6.47103	6.35419	6.20147	6.40235	6.56469	7.13885
BP_RS00665	bp0127	_	_	ABC transporter permease	_	3	B	0.731488	5.4383	5.57243	5.41873	5.43415	5.30316	5.61175	4.74289	5.32002	5.72271	5.18164	4.74895	5.30531	5.34179	5.78505	5.12944	6.44753	6.57959	6.28956	6.2723	6.59421	6.69776
BP_RS00670	bp0128	_	_	extracellular solute-binding protein	Probable periplasmic solute-binding protein	2	B	0.912013	7.00824	7.22184	6.80978	6.91722	6.97808	6.8054	7.15751	6.97306	6.96392	7.09828	6.76983	6.86747	7.09472	7.30514	6.91256	7.86773	7.77747	7.77906	8.27401	8.69143	9.06361
BP_RS00675	bp0129	_	_	substrate-binding domain-containing protein	_	2	B	0.51667	5.47189	5.20004	5.18384	5.28714	4.95722	5.26143	5.57037	4.79929	5.05345	4.7636	4.91757	4.83441	5.43571	6.15687	5.37285	5.60035	5.80401	5.97426	6.05175	6.25096	5.90044
BP_RS00685	bp0130	_	_	amidase	Amidase	5	C	0.955854	10.2156	10.2799	10.3165	9.86875	9.918	9.7829	10.0496	10.0569	9.96487	9.82303	9.82343	9.83244	8.97049	9.11758	9.01086	10.1066	10.0014	10.1343	10.0286	10.0735	10.1291
BP_RS00690	bp0131	leuA	leuA	2-isopropylmalate synthase	2-isopropylmalate synthase (EC 2.3.3.13) (Alpha-IPM synthase) (Alpha-isopropylmalate synthase)	1	B	0.954874	11.7719	11.7707	11.6931	11.7955	12.0893	12.0562	11.9971	12.162	12.3097	12.4029	12.2977	12.2787	12.9368	13.0042	12.9701	12.589	12.571	12.643	13.144	13.1254	13.3741
BP_RS00695	bp0132	_	_	hypothetical protein	Putative membrane protein	13	_	0.74333	10.3742	10.3313	10.2953	10.1131	10.6475	11.039	10.5819	10.8927	10.7017	9.95255	10.0649	10.1928	10.5563	10.6462	10.7579	10.1246	10.0251	10.1449	9.6894	9.81944	10.2207
BP_RS00700	bp0133	rpoN	rpoN	RNA polymerase factor sigma-54	RNA polymerase sigma-54 factor	11	_	0.791576	9.01445	9.14488	9.28341	9.48512	9.44564	9.44484	9.54563	9.45298	9.51351	9.45605	9.42203	9.36105	9.32656	9.34686	9.42523	9.39377	9.37783	9.34097	9.09359	8.89388	8.76773
BP_RS00705	bp0134	_	_	bacterioferritin-associated ferredoxin	Putative bacterioferritin-associated ferredoxin	8	_	0.345663	6.49514	6.28933	6.25664	7.61345	7.58656	8.11222	8.61239	8.57957	7.82942	7.02335	7.4542	7.52717	8.0261	8.87815	8.03289	8.12128	8.53086	8.00117	7.54881	8.1571	8.09174
BP_RS00710	bp0135	_	_	LysR family transcriptional regulator	Probable LysR-family transcriptional regulator	1	B	0.776662	7.47188	7.58226	7.70964	8.57885	8.98933	9.04556	8.91091	8.92735	9.02899	8.6006	8.69582	8.71238	9.36019	9.68891	9.19578	9.64836	9.76313	9.17987	9.283	9.87639	9.96499
BP_RS00715	bp0136	_	_	DMT family transporter	_	_	_	0.0201881	6.089	6.01595	6.08232	7.14987	7.6378	7.28681	7.00798	7.31999	7.18562	7.24915	7.2152	7.06848	7.31486	7.3543	7.15511	7.27424	7.29454	7.29167	7.01709	7.31663	7.54509
BP_RS00725	bp0138	_	_	porin	_	10	D	0.419305	6.28429	6.29302	6.28771	5.86413	5.68459	5.77373	5.75921	5.43991	6.09041	5.37616	5.27631	5.44862	5.99417	6.51642	6.49418	5.67582	5.6074	4.98235	5.55463	5.37402	4.59818
BP_RS00730	bp0139	ilvA	ilvA	threonine ammonia-lyase%2C biosynthetic	L-threonine dehydratase (EC 4.3.1.19) (Threonine deaminase)	7	A	0.757915	11.6089	11.5646	11.5659	11.29	10.7728	10.8562	11.2432	11.1364	11.0672	11.1194	11.0466	11.042	10.6021	10.4105	10.3853	10.0935	10.0104	10.2846	10.2449	9.6689	8.33693
BP_RS00735	bp0140	_	_	DedA family protein	_	11	_	0.489651	8.43176	8.31318	8.31821	8.06371	7.70422	7.23768	7.70121	7.5768	7.76091	7.54722	7.51483	7.50492	7.76308	7.97351	7.75766	7.43131	7.42498	7.36238	7.4542	7.38476	6.48642
BP_RS00740	bp0141	_	_	FAD/FMN-binding oxidoreductase	Probable iron-sulfur binding oxidase	10	D	0.979849	12.569	12.5442	12.5814	12.4367	12.5158	12.5493	12.41	12.4649	12.3911	12.3815	12.328	12.3436	13.4333	13.2923	13.411	12.1445	11.9849	12.1621	11.94	11.9221	12.1924
BP_RS00745	bp0142	_	_	GntR family transcriptional regulator	GntR family transcriptional regulator	4	A	0.878794	8.69775	8.36859	8.47482	8.38136	7.99491	7.91458	7.70121	7.38324	7.44894	7.78741	7.74367	7.88497	8.03044	8.13577	8.04595	7.02004	7.16654	7.09342	6.73425	6.43574	6.19753
BP_RS00750	bp0143	_	_	CoA transferase	Uncharacterized protein	_	_	0.224877	5.1346	5.24608	5.17022	5.15955	5.01117	4.98022	5.54518	4.85609	4.51306	4.32723	4.5487	4.63738	5.48047	6.05847	5.40449	5.05398	5.12823	4.81314	5.20568	5.23655	4.18066
BP_RS00755	bp0144	_	_	alpha/beta hydrolase fold domain-containing protein	Putative lipase	_	_	0.0356865	2.89591	2.84109	3.01253	1.49147	3.13072	2.41541	1.1188	3.16819	2.75457	1.70435	2.04198	2.70177	2.6906	3.71535	3.37893	2.58534	3.1669	1.8575	2.67642	3.12543	4.06235
BP_RS00760	bp0145	_	_	enoyl-CoA hydratase	Putative enoyl-CoA hydratase/isomerase	_	_	0.0037186	3.93424	4.12095	3.57604	3.93658	3.10796	3.46407	2.93457	1.99853	3.64494	3.21299	2.96692	3.69422	2.17284	4.26852	3.42149	4.01926	4.32919	4.13893	2.2001	2.98875	3.97974
BP_RS00765	bp0146	_	_	FAD-dependent monooxygenase	_	_	_	0.0154381	4.84541	5.10776	5.13871	5.26555	5.12699	4.72467	4.66665	5.05604	4.82469	4.63957	5.21107	4.4395	4.53757	5.22516	5.21266	5.12103	4.79152	5.01788	5.40818	4.96295	5.25265
BP_RS00770	bp0148	_	_	tripartite tricarboxylate transporter substrate binding protein	UPF0065 protein BP0148 (ORF5)	2	B	0.290124	7.33904	7.31145	7.4078	7.26297	7.2229	6.98095	7.47741	7.16798	7.22086	7.32531	7.15334	7.164	7.09472	7.74032	7.31476	7.34869	7.42359	7.60852	7.58486	7.48927	7.49128
BP_RS00775	bp0149	_	_	IclR family transcriptional regulator	Probable transcriptional regulator	3	B	0.58601	8.50255	8.49352	8.63279	8.61432	8.53687	8.62834	8.47336	8.58318	8.64216	8.51113	8.27887	8.26618	8.93456	8.95016	8.71378	8.84655	8.94497	8.68257	8.69814	9.01322	9.23394
BP_RS00780	bp0150	_	_	LamB/YcsF family protein	_	9	D	0.555306	8.87708	9.20625	9.29794	9.57236	9.62262	9.40348	9.57252	9.48279	9.64093	9.67154	9.65027	9.66532	9.93911	10.0065	9.89933	9.72896	9.62367	9.70374	9.89604	9.86033	10.8408
BP_RS00785	bp0151	_	_	biotin-dependent carboxyltransferase	AHS2 domain-containing protein	8	_	0.342652	9.23096	9.33508	9.4926	9.68639	9.55579	9.59842	9.61409	9.3884	9.60434	9.5571	9.65043	9.68689	9.61169	9.64631	9.62819	9.56366	9.2704	9.62071	9.56883	9.75886	11.1298
BP_RS00790	bp0152	pxpB	_	5-oxoprolinase subunit PxpB	AHS1 domain-containing protein	6	_	0.389158	8.30701	8.56551	8.61384	8.80815	8.67778	8.53516	8.59405	8.54108	8.60833	8.65708	8.86061	8.7817	8.81732	8.74047	8.81139	8.56828	8.57131	8.59871	8.62448	9.03225	11.1299
BP_RS00795	bp0153	_	_	VOC family protein	Probable dioxygenase	5	C	0.668637	6.4667	6.43999	7.13985	6.97342	7.12203	7.25979	7.12685	7.17797	7.19117	7.35015	7.00947	7.1153	7.32264	7.64934	7.66347	6.74826	6.99184	7.14782	7.89105	10.4358	13.1529
BP_RS00800	bp0154	_	brg1	LysR family transcriptional regulator	LysR family transcriptional regulator	8	_	0.551732	6.52032	6.64291	7.21745	7.47287	7.97585	7.84664	8.00895	7.96532	7.83435	8.05664	8.04985	8.02085	8.23724	8.36995	8.2132	8.01047	8.34237	8.03133	8.2259	8.3797	8.71797
BP_RS00805	bp0155	serA	serA	phosphoglycerate dehydrogenase	D-3-phosphoglycerate dehydrogenase (EC 1.1.1.95)	11	_	0.44075	8.82751	8.72438	8.8713	9.15456	9.11856	9.34657	9.22659	9.21964	9.19809	8.85102	8.75651	8.93601	9.04905	9.27151	9.13601	9.15084	9.20628	9.24536	8.83639	9.08255	9.50197
BP_RS00810	bp0156	_	_	DUF411 domain-containing protein	Putative exported protein	_	_	0.04843	8.14924	8.0145	8.01834	8.15516	8.29864	8.20718	8.18025	8.31094	8.37434	8.21582	8.46918	8.31314	8.31813	8.17411	8.09292	8.30397	8.23001	8.2796	8.13121	8.20267	7.97084
BP_RS00815	bp0157	_	_	heavy metal sensor histidine kinase	Sensor protein (EC 2.7.13.3)	4	A	0.315198	7.21696	7.2387	7.38784	7.1531	7.07016	6.82619	6.62152	6.88071	6.69885	6.50752	6.53083	6.58464	6.40162	6.61246	6.29858	6.27179	6.69673	6.73032	6.4176	6.12319	6.48834
BP_RS00820	bp0158	_	_	heavy metal response regulator transcription factor	Two-component response regulator	7	A	0.521836	7.54039	7.56153	7.68667	7.5376	7.45591	7.32098	7.56709	7.40712	7.44971	7.36928	7.30827	7.47835	7.19911	7.156	7.28284	7.20426	7.13066	7.04098	7.03697	7.18858	6.46622
BP_RS00825	bp0159	phoR	phoR	phosphate regulon sensor histidine kinase PhoR	Phosphate regulon sensor protein PhoR (EC 2.7.13.3)	7	A	0.799202	9.72201	9.56083	9.53798	9.5422	9.47748	9.45435	9.40524	9.20709	9.40509	9.11418	9.12592	9.17031	9.14754	9.12996	9.19352	9.06654	9.29442	9.14745	8.84917	8.78916	8.53303
BP_RS00830	bp0160	phoB	phoB	phosphate regulon transcriptional regulator PhoB	Phosphate regulon transcriptional regulatory protein PhoB	_	_	0.0171442	9.20051	9.22444	9.2442	8.89217	9.37374	9.37649	9.1677	9.18898	9.24915	9.0924	9.24065	9.00684	9.25641	9.39365	9.36273	9.2818	9.13957	9.16659	9.11993	9.13733	9.27442
BP_RS00835	bp0161	ubiE	ubiE	bifunctional demethylmenaquinone methyltransferase/2-methoxy-6-polyprenyl-1%2C4-benzoquinol methylase UbiE	Ubiquinone/menaquinone biosynthesis C-methyltransferase UbiE (EC 2.1.1.163) (EC 2.1.1.201) (2-methoxy-6-polyprenyl-1,4-benzoquinol methylase) (Demethylmenaquinone methyltransferase)	_	_	0.20888	9.79141	9.87161	9.87154	10.0031	10.3695	10.5022	10.236	10.423	10.2404	10.0904	10.0562	10.0035	10.2217	10.1546	10.1716	10.2558	10.2912	10.3508	10.0652	10.2152	10.6389
BP_RS00840	bp0162	_	_	Tim44 domain-containing protein	Putative membrane protein	9	D	0.901465	10.4086	10.5736	10.7165	10.9841	11.1909	11.1781	11.0318	11.1734	11.3451	11.4605	11.6098	11.6957	12.1166	11.9379	12.1327	11.4111	11.3606	11.4445	11.5689	11.6194	11.8315
BP_RS00845	bp0163	_	ubiJ	SCP2 sterol-binding domain-containing protein	Ubiquinone biosynthesis accessory factor UbiJ	7	A	0.792038	10.3777	10.3229	10.2097	10.1858	10.1113	10.0214	9.60865	9.71915	9.75511	9.79799	10.0038	9.91209	9.80798	9.62114	9.73684	9.31154	9.29581	9.44123	9.29247	9.29928	8.50815
BP_RS00850	bp0164	ubiB	ubiB	ubiquinone biosynthesis regulatory protein kinase UbiB	Probable ubiquinone biosynthesis protein	4	A	0.877503	12.5626	12.2909	12.1799	11.7169	11.3079	11.2899	11.3767	11.1254	11.0567	10.9641	10.9827	11.029	10.8344	10.8158	10.9553	10.6247	10.5714	10.8514	10.5616	10.2763	10.1636
BP_RS00855	bp0165	_	_	ferritin-like domain-containing protein	_	4	A	0.744451	9.64712	9.49151	9.45996	9.20186	8.99009	9.15629	8.96084	8.72721	8.91311	8.99495	8.97902	8.94141	8.8669	8.79266	8.8639	8.5288	8.47292	8.33082	8.70789	8.36611	8.14104
BP_RS00865	bp0167	_	_	ABC transporter ATP-binding protein	_	4	A	0.780004	9.38619	9.23589	9.05495	8.35749	7.98941	8.06119	7.94764	7.59067	7.86755	7.54322	7.58438	7.74387	8.26055	8.37948	8.19648	7.43924	7.79334	7.56525	7.29818	7.208	6.5528
BP_RS00870	bp0168	_	_	YgcG family protein	Putative membrane protein	7	A	0.794027	10.5555	10.4281	10.352	9.50504	9.55116	9.5041	9.52283	9.36552	9.42451	9.12542	9.33314	9.28282	8.91838	8.84632	9.01086	8.88409	8.81102	8.94852	8.73512	8.83839	7.97847
BP_RS00875	bp0169	_	_	LemA family protein	Putative exported protein	4	A	0.547702	10.6001	10.4967	10.4874	9.85193	9.56506	9.73231	9.67074	9.81023	9.6982	9.97122	9.97619	9.91408	9.81833	9.528	9.74836	9.36075	9.37381	9.21659	9.64226	9.47993	8.54012
BP_RS00880	bp0170	_	rhlE	DEAD/DEAH box helicase	ATP-dependent RNA helicase RhlE (EC 3.6.4.13)	4	A	0.805012	13.4253	13.1551	12.9922	11.7744	10.9428	10.9438	10.9648	11.0024	10.9695	11.1444	11.1142	11.269	11.2663	11.3438	11.3988	10.2454	10.1872	10.4835	10.2587	9.73617	8.6184
BP_RS00885	bp0171	_	_	LysE family transporter	LysE family efflux protein	4	A	0.923234	12.7718	12.2365	12.0104	10.5509	10.147	10.3207	10.2028	10.1401	10.2365	9.86228	10.0483	10.1647	9.88498	10.2102	10.0545	9.05302	8.98463	9.37117	9.11993	9.10998	8.9138
BP_RS00890	bp0172	_	prfC	peptide chain release factor 3	Peptide chain release factor 3 (RF-3)	4	A	0.904239	13.4885	13.3033	13.1563	12.0635	11.868	11.8141	11.9834	11.7662	11.6657	11.5947	11.4641	11.5568	11.8007	11.8827	11.8302	11.1318	11.2504	11.2157	11.2271	11.051	10.7256
BP_RS00895	bp0173	_	_	hypothetical protein	Putative exported protein	12	_	0.823017	11.4635	11.3065	11.1575	10.4657	11.0896	10.943	10.7304	10.709	10.6836	10.5031	10.4799	10.4714	11.4787	11.6068	11.5245	11.0457	11.1304	10.8449	11.0201	11.2372	11.8045
BP_RS00900	bp0174	bfr	bfr	bacterioferritin	Bacterioferritin	3	B	0.814249	8.84631	9.34304	9.37623	9.84053	10.1668	9.98997	10.0329	10.0602	10.2371	10.4083	10.2184	10.2431	10.6286	10.3966	10.3611	10.7495	10.6189	10.555	10.808	10.8112	11.0099
BP_RS00910	bp0176	_	_	response regulator transcription factor	_	_	_	0.146462	5.80127	6.13206	5.98265	6.5273	6.45264	6.43145	6.35436	6.20618	6.44359	6.34535	6.67806	6.68455	6.55073	6.48174	6.31549	6.6097	6.38895	6.26283	6.33969	6.2727	5.89585
BP_RS00915	bp0177	_	_	META domain-containing protein	Putative lipoprotein	12	_	0.870941	9.78031	9.76874	9.76093	9.62397	9.87871	9.90496	9.76548	9.77767	9.70196	9.34869	9.46602	9.49917	10.349	10.4061	10.4222	9.6762	9.73056	9.7406	9.71466	9.93288	10.12
BP_RS00920	bp0178	_	_	META and DUF4377 domain-containing protein	Putative lipoprotein	9	D	0.928443	9.50636	9.57492	9.63249	9.41983	9.57793	9.78475	9.8511	9.79723	9.87023	9.73828	9.81482	9.82919	10.5079	10.5019	10.5691	9.74402	9.63865	9.79699	9.87975	9.93441	10.1044
BP_RS00925	bp0179	_	trhO	sulfurtransferase	tRNA uridine(34) hydroxylase (EC 1.14.-.-) (tRNA hydroxylation protein O)	10	D	0.897773	9.21754	9.14769	9.08747	8.74418	8.6097	8.76439	8.85499	8.85914	8.78052	8.68146	9.06683	8.81607	9.8625	9.69031	9.8354	8.60142	8.5044	8.61588	8.91052	8.80893	8.57834
BP_RS00930	bp0180	metG	metG	methionine--tRNA ligase	Methionine--tRNA ligase (EC 6.1.1.10) (Methionyl-tRNA synthetase) (MetRS)	4	A	0.81788	12.8895	12.9104	12.8988	12.3031	12.1666	12.0924	11.9905	12.1031	12.0965	12.4043	12.2914	12.3247	12.5124	12.29	12.3743	11.7674	11.7045	11.8391	11.7774	11.5173	10.8682
BP_RS00935	bp0181	_	_	hypothetical protein	Putative exported protein	2	B	0.562699	10.8683	10.6737	10.7047	10.4549	10.8446	10.8944	10.3321	10.4883	10.7297	10.1613	10.3779	10.3854	10.6642	10.4313	10.4538	10.4575	10.5374	10.619	10.7002	10.9176	11.5337
BP_RS00940	bp0182	apbC	_	iron-sulfur cluster carrier protein ApbC	Iron-sulfur cluster carrier protein	11	_	0.398968	10.0972	10.1112	10.1268	10.2369	10.3963	10.3952	10.2501	10.3299	10.2771	9.87261	10.0202	10.0702	10.1939	10.2484	10.1509	10.0178	10.1922	10.155	9.95078	10.1507	10.3341
BP_RS00945	bp0183	_	_	BamA/TamA family outer membrane protein	Autotransporter assembly factor TamA (Translocation and assembly module subunit TamA)	4	A	0.825548	10.4826	10.4663	10.5504	10.6033	10.2487	10.2062	10.0646	10.1104	10.0752	9.99237	9.97619	10.0439	9.64189	9.78906	9.73422	9.78345	9.67432	9.74787	9.6821	9.64284	9.45469
BP_RS00950	bp0184	_	_	translocation/assembly module TamB domain-containing protein	Putative exported protein	4	A	0.869667	11.5145	11.4887	11.5273	11.1754	11.1271	11.1314	10.8413	10.8658	10.9023	10.6694	10.7665	10.7574	10.6496	10.5034	10.4213	10.4557	10.6209	10.5727	10.4481	10.4225	10.3772
BP_RS00955	bp0185	_	dcd	dCTP deaminase	dCTP deaminase (EC 3.5.4.13) (Deoxycytidine triphosphate deaminase)	9	D	0.886199	11.9717	11.9289	11.9934	12.0674	12.0958	12.0487	12.0712	12.083	12.1449	12.2132	11.9786	12.0969	12.7558	12.5931	12.5068	12.0418	12.0498	12.2015	12.1161	11.999	12.1192
BP_RS00960	bp0186	_	_	VOC family protein	VOC domain-containing protein	10	D	0.599994	8.61364	8.60658	8.57304	8.54775	8.28758	8.35893	8.38122	8.24123	8.36102	8.3663	8.21746	8.41361	8.72732	8.70607	8.7973	8.24134	8.17652	8.37502	8.36027	8.32068	8.37897
BP_RS00965	bp0187	_	_	VOC family protein	Putative lyase	2	B	0.486798	7.24956	6.86569	6.84996	7.68537	7.16515	7.6403	7.28592	6.87237	7.03306	6.88827	6.97412	6.72266	7.18566	7.49977	7.51543	7.70487	7.52845	7.2534	7.57452	7.65744	7.57633
BP_RS00970	bp0188	_	_	GNAT family N-acetyltransferase	_	13	_	0.559997	7.11609	7.10496	7.01498	7.33993	7.49335	7.48314	7.53099	7.01644	7.34229	6.75837	6.91573	6.91271	7.69318	7.76529	7.74908	7.07112	7.42359	6.76521	7.17233	7.07822	6.84837
BP_RS00975	bp0189	_	_	hypothetical protein	Uncharacterized protein	13	_	0.693602	8.90643	8.95136	8.90986	8.68187	9.34679	9.81894	8.844	9.37743	9.30197	8.46972	8.5184	8.64452	9.56604	9.7447	9.8101	9.02995	9.09545	9.05399	8.65375	8.94038	9.10844
BP_RS00980	bp0190	_	_	arginine/lysine/ornithine decarboxylase	Probable orn/arg/lys decarboxylase (EC 4.1.1.19)	7	A	0.862726	14.2051	14.139	14.1266	13.1353	13.2114	13.2589	13.0217	13.0925	13.0153	13.2177	13.136	13.09	12.9832	13.0096	13.115	12.6457	12.6239	12.7784	12.975	12.8359	12.9787
BP_RS00985	bp0191	_	_	NAD(P)/FAD-dependent oxidoreductase	Putative exported protein	4	A	0.92549	10.5747	10.3978	10.365	9.60421	9.3674	9.55957	9.0127	9.00537	8.92127	9.01032	9.08374	9.08257	8.83466	8.94525	8.84421	8.14298	8.38489	8.34641	8.5579	8.18029	8.19139
BP_RS00995	bp0193	_	sodA	superoxide dismutase	Superoxide dismutase [Mn] (EC 1.15.1.1)	3	B	0.812645	4.74469	3.58028	3.99666	4.11319	3.94777	4.25275	3.59401	4.84813	3.91376	3.97934	4.13419	4.34135	7.08779	8.18304	7.02308	6.82699	7.49002	5.67437	6.68336	7.51207	6.53158
BP_RS01000	bp0194	_	_	ZIP family metal transporter	Probable metal transporter	3	B	0.686382	4.37533	4.63457	4.14652	4.27746	4.94131	4.94099	4.75077	4.45757	4.79229	4.51584	4.44542	5.08444	5.38952	5.87185	5.81099	5.48426	5.812	5.51111	5.73143	6.37674	6.05662
BP_RS01005	bp0195	gcvT	gcvT	glycine cleavage system aminomethyltransferase GcvT	Aminomethyltransferase (EC 2.1.2.10) (Glycine cleavage system T protein)	10	D	0.987456	10.2898	10.4176	10.4414	10.8623	11.087	10.9947	10.7023	10.6933	10.6494	10.8809	10.881	10.9587	12.1891	12.0475	12.2209	8.65823	8.83265	9.09128	7.98553	8.48035	8.28007
BP_RS01010	bp0196	gcvH	gcvH	glycine cleavage system protein GcvH	Glycine cleavage system H protein	10	D	0.976406	10.5806	10.7935	10.8072	11.6355	11.5342	11.5533	11.3154	11.3656	11.4103	11.8273	11.7815	11.7798	12.8099	12.8598	12.9567	10.0397	9.80556	10.487	10.1412	10.2228	10.3533
BP_RS01015	bp0197	gcvP	gcvP	aminomethyl-transferring glycine dehydrogenase	Glycine dehydrogenase (decarboxylating) (EC 1.4.4.2) (Glycine cleavage system P-protein) (Glycine decarboxylase) (Glycine dehydrogenase (aminomethyl-transferring))	10	D	0.978702	11.726	12.0269	12.1743	12.6485	12.7147	12.5765	12.4758	12.5463	12.5923	12.8873	12.7474	12.7466	13.991	13.8096	13.8703	10.6316	10.4315	11.4343	10.5221	10.4609	10.7291
BP_RS01020	bp0198	_	_	FadR family transcriptional regulator	Putative GntR-family transcriptional regulator	9	D	0.85582	9.03604	9.37014	9.44098	9.61906	9.86592	10.1765	10.1288	10.1578	10.1313	9.96861	9.87507	9.83356	10.6364	10.7347	10.7075	10.0178	10.0151	10.1732	9.50788	9.60155	9.94578
BP_RS01025	bp0199	_	_	CoA transferase	Uncharacterized protein	_	_	0.242743	6.58284	6.24972	6.48693	6.00794	6.15216	6.40348	6.18964	6.28347	6.44708	6.87034	6.422	6.3613	6.84564	6.78418	6.65707	6.48828	6.47852	6.40963	6.30731	6.45488	6.5071
BP_RS01030	bp0200	_	_	tripartite tricarboxylate transporter substrate binding protein	Putative exported protein	5	C	0.647592	7.05299	6.9376	6.95137	6.84047	6.53075	6.68702	7.00414	7.01288	6.8567	7.34584	7.2008	7.08637	6.67147	6.77191	7.01372	6.95499	6.84212	7.18256	7.40149	7.57215	8.14104
BP_RS01035	bp0201	_	_	enoyl-CoA hydratase/isomerase family protein	_	4	A	0.620968	6.85288	6.67692	6.72439	7.17122	6.96846	7.00878	6.46754	6.59798	6.7885	6.36855	6.53435	6.37105	6.39316	6.55755	6.31549	6.04484	6.36983	6.21856	5.99604	5.91495	5.64878
BP_RS01050	bp0204	_	_	HindIII family type II restriction endonuclease	Putative restriction endonuclease	7	A	0.474734	10.7856	10.8496	10.7851	10.8378	10.5091	10.3963	10.4987	10.3185	10.3572	10.5428	10.4893	10.4465	10.5084	10.3638	10.4911	10.22	10.1628	10.2163	10.3277	10.3386	10.4166
BP_RS01055	bp0205	_	_	preprotein translocase subunit SecD	Putative exported protein	3	B	0.883451	11.153	11.3644	11.3957	11.6879	12.1924	12.0732	11.8555	12.0022	12.0597	12.0514	11.936	11.9127	13.0244	12.7219	12.9128	12.3936	12.4392	12.4738	12.7163	12.781	13.2772
BP_RS01060	bp0206	thiC	thiC	phosphomethylpyrimidine synthase ThiC	Phosphomethylpyrimidine synthase (EC 4.1.99.17) (Hydroxymethylpyrimidine phosphate synthase) (HMP-P synthase) (HMP-phosphate synthase) (HMPP synthase) (Thiamine biosynthesis protein ThiC)	9	D	0.957471	11.8778	12.0771	12.0379	12.051	12.2998	12.2235	12.3232	12.4568	12.4566	12.631	12.4642	12.4397	13.4106	13.2765	13.3655	12.4205	12.4308	12.4461	12.7689	12.6875	12.7868
BP_RS01065	bp0207	_	_	aldehyde dehydrogenase family protein	Putative aldehyde dehydrogenase	9	D	0.889462	7.99315	8.25299	8.18099	8.1025	8.22518	8.03617	8.45184	8.2477	8.3325	8.33668	8.46607	8.34197	9.38565	9.30429	9.21152	8.37569	8.26861	8.26689	8.62777	8.66018	8.80906
BP_RS01070	bp0208	_	_	FAD-binding oxidoreductase	Putative oxidoreductase	4	A	0.64533	8.62993	8.86379	8.92744	8.979	9.01378	8.97483	9.02249	9.03422	9.02969	9.08409	9.05747	9.10441	9.02008	8.83457	8.77022	8.5741	8.486	8.64683	8.89019	8.80601	9.01734
BP_RS01075	bp0209	_	_	FadR family transcriptional regulator	Putative GntR-family transcriptional regulator	_	_	0.138211	7.46421	7.81894	7.76848	7.62626	7.41753	7.62266	7.95438	7.55419	7.60524	7.51771	7.56966	7.60592	7.71208	8.15556	7.82705	7.24184	7.6727	7.31147	7.1597	7.30613	7.29129
BP_RS01080	bp0210	_	_	IS481-like element IS481 family transposase	Transposase	_	_	0.123646	3.87947	4.56116	4.27917	4.01849	3.40881	3.78545	3.83699	3.47783	2.88536	4.22324	3.2879	3.34876	3.19908	2.59688	3.47369	3.08786	3.18415	2.49573	2.45626	2.28194	2.40153
BP_RS01090	bp0212	_	vgb	virginiamycin B lyase	Virginiamycin B lyase (EC 4.2.99.-) (Streptogramin B lyase)	10	D	0.293789	7.62466	7.32135	7.434	7.24364	7.06467	7.30196	7.26036	7.21569	7.27566	7.09434	7.2152	7.22545	7.76417	7.79394	7.41024	7.41674	7.36108	7.17427	6.97648	7.38809	6.87165
BP_RS01095	bp0213	_	_	N-acetyltransferase	Putative acetyltransferase	3	B	0.885045	8.1237	7.93224	8.05069	8.29084	8.2643	8.43688	8.27214	8.19599	8.26277	8.07721	8.07468	8.05315	8.75305	8.95343	8.52246	8.96551	9.13957	8.7916	8.98588	9.08869	9.23394
BP_RS01100	bp0214	queC	queC	7-cyano-7-deazaguanine synthase QueC	7-cyano-7-deazaguanine synthase (EC 6.3.4.20) (7-cyano-7-carbaguanine synthase) (PreQ(0) synthase) (Queuosine biosynthesis protein QueC)	2	B	0.721123	9.72969	9.83237	9.90396	10.0051	10.1192	9.86711	9.83719	9.86841	9.97032	10.0029	9.85066	9.93318	9.90872	9.7971	9.89927	10.1893	10.1395	10.0869	10.2692	10.3525	10.7181
BP_RS01105	bp0215	ppc	ppc	phosphoenolpyruvate carboxylase	Phosphoenolpyruvate carboxylase (PEPC) (PEPCase) (EC 4.1.1.31)	10	D	0.849904	11.289	11.3867	11.378	11.3583	11.4967	11.4437	11.4488	11.549	11.5535	11.802	11.6862	11.6884	11.9004	11.8634	11.9415	11.33	11.2855	11.4146	11.5454	11.3674	11.1006
BP_RS01110	bp0216	sphB1	sphB1	serine protease autotransporter SphB1	Autotransporter subtilisin-like protease	8	_	0.620963	13.1903	13.5927	13.7854	14.797	14.7092	14.625	14.9494	14.9759	15.0018	15.1819	14.9636	15.0279	15.0402	14.9235	14.9864	15.0879	15.0004	15.2001	14.9885	14.8098	14.4309
BP_RS01115	bp0217	_	_	3-hydroxyacyl-CoA dehydrogenase family protein	3-hydroxybutyryl-CoA dehydrogenase (EC 1.1.1.157)	9	D	0.981817	9.88199	9.86208	9.82121	10.3443	10.2332	10.2825	10.1412	10.1248	10.0393	10.0431	10.0576	10.0054	11.4865	11.4922	11.4253	9.7304	9.66194	9.83088	9.72343	9.72962	9.82607
BP_RS01120	bp0218	_	_	short-chain fatty acid transporter	Short-chain fatty acids transporter	10	D	0.948264	11.1402	11.0503	11.0699	11.3707	11.4297	11.3389	10.8171	11.1888	11.1481	11.4481	11.2156	11.1659	12.6397	12.5309	12.625	10.9155	10.9152	11.0017	11.0075	10.9583	11.4454
BP_RS01125	bp0219	_	_	SDR family oxidoreductase	Probable short-chain dehydrogenase	10	D	0.898597	9.11781	9.15529	9.10486	8.93982	9.10167	9.09916	8.56328	8.78165	8.81459	9.03779	8.86396	8.85644	10.15	9.84571	10.0089	8.53086	8.66903	8.55169	8.53626	8.63523	9.11775
BP_RS01130	bp0220	_	_	IclR family transcriptional regulator	Probable transcriptional regulator	10	D	0.906087	10.0567	9.93431	9.95922	9.83225	9.64202	9.61702	9.43485	9.38175	9.36015	9.37248	9.35483	9.32505	9.75724	9.78036	9.88952	8.87646	9.11663	9.16019	8.9136	9.03474	9.01252
BP_RS01135	bp0221	_	catI	3-oxoacid CoA-transferase subunit A	3-oxoadipate CoA-transferase subunit A (EC 2.8.3.6)	9	D	0.846518	8.97429	8.98482	8.94216	9.48329	9.63007	9.60848	9.07897	9.4201	9.47779	9.32455	9.26751	9.27711	9.87978	10.0893	10.087	9.6871	9.7312	9.65084	9.79156	9.8203	10.1746
BP_RS01140	bp0222	_	catJ	CoA transferase subunit B	3-oxoadipate CoA-transferase subunit B (EC 2.8.3.6)	1	B	0.808298	8.90795	8.95708	8.99624	9.38312	9.3589	9.21773	9.07486	9.11174	9.08207	9.21571	9.09495	9.0222	9.89097	9.93863	9.9979	9.78345	9.64226	9.83291	9.64359	9.84623	10.6372
BP_RS01145	bp0223	catC	catC2	muconolactone Delta-isomerase	Muconolactone Delta-isomerase (MIase) (EC 5.3.3.4)	3	B	0.743008	8.4672	8.66246	8.74929	9.17033	9.27411	9.41709	8.92152	9.12991	9.08169	9.41029	9.10818	9.18459	9.75809	9.91151	9.85607	9.70996	9.49445	9.51504	9.68699	9.84771	10.7759
BP_RS01150	bp0224	_	_	YciI family protein	YCII domain-containing protein	9	D	0.786583	7.7521	7.85207	7.80924	8.35765	8.50375	8.37603	8.07312	7.95621	8.22292	8.36982	8.3801	8.20691	8.86994	8.89513	9.0642	8.76449	8.45608	8.79233	8.8203	8.8684	9.52984
BP_RS01155	bp0225	pcaD	catD2	3-oxoadipate enol-lactonase	3-oxoadipate enol-lactone hydrolase (EC 3.1.1.24)	9	D	0.799463	9.34207	9.47913	9.51206	9.80316	9.87771	9.7163	9.40848	9.55027	9.66002	9.82345	9.80216	9.78554	10.4767	10.3845	10.5178	10.1057	10.005	10.1467	10.0923	10.1009	10.7674
BP_RS01160	bp0226	_	_	cyclase family protein	Uncharacterized protein	3	B	0.942998	9.15989	9.20417	9.29132	9.65621	9.55991	9.60388	9.52056	9.63648	9.63605	9.70719	9.77275	9.69018	10.4031	10.5154	10.4656	10.3588	10.2849	10.2201	10.2657	10.3866	10.5115
BP_RS01165	bp0227	_	psiF	phosphate starvation-inducible protein	Phosphate starvation-inducible protein	2	B	0.966838	8.30635	8.68771	8.6286	9.23649	9.8529	9.75341	9.87001	9.83102	9.84319	9.86178	9.7049	9.63275	11.4355	11.5091	11.4342	11.3821	11.3922	11.1743	11.651	11.832	12.3096
BP_RS01175	bp0229	_	_	SDR family oxidoreductase	Beta-D-hydroxybutyrate dehydrogenase (EC 1.1.1.30)	10	D	0.610839	7.35443	7.59761	7.49169	7.60148	7.54664	7.64691	7.42259	7.22497	7.38774	7.29427	7.51693	7.43515	7.94551	7.98851	7.81355	7.36444	7.59298	7.4371	7.02268	7.37048	6.3742
BP_RS01180	bp0230	_	_	N-acyl homoserine lactonase family protein	_	3	B	0.431512	5.63673	5.41918	5.6394	5.28714	5.78433	5.48547	5.66788	5.69226	5.29209	5.90807	5.8935	5.89072	5.78287	6.27694	6.04932	6.25134	6.42447	6.01451	6.11771	6.22889	6.09912
BP_RS01185	bp0231	_	pcaC	carboxymuconolactone decarboxylase family protein	4-carboxymuconolactone decarboxylase (EC 4.1.1.44)	3	B	0.441471	6.23292	5.80299	5.9808	5.62546	6.34033	6.2776	6.20247	6.11317	6.05528	6.3843	6.30292	6.28813	6.54545	7.2526	6.6371	6.94488	7.18307	6.50912	6.49523	6.89034	6.67777
BP_RS01190	bp0232	yihU	_	sulfolactaldehyde 3-reductase	_	10	D	0.643301	7.10562	6.91752	7.0239	6.31679	6.32861	6.40807	6.12142	6.06416	5.93814	6.02825	6.03833	5.87806	7.02874	7.3381	7.09806	5.87081	6.78528	6.03333	6.05175	5.85758	5.76205
BP_RS01195	bp0233	_	_	GntR family transcriptional regulator	GntR family transcriptional regulator	12	_	0.846025	11.2317	11.1655	11.0793	11.2469	11.1441	11.2241	11.1095	11.0268	11.097	11.2122	11.142	11.248	11.8306	11.8049	11.7347	11.327	11.2964	11.3646	11.5534	11.3687	11.3361
BP_RS01200	bp0234	_	_	TRAP transporter substrate-binding protein	Putative solute-binding periplasmic protein	10	D	0.517303	10.6995	10.4949	10.4267	10.7009	10.2702	10.3789	10.8831	10.3747	10.4165	10.3324	10.2101	10.4648	10.8193	11.0016	10.8237	10.5353	10.4843	10.6041	10.6409	10.4225	10.1518
BP_RS01205	bp0235	_	_	TRAP transporter large permease subunit	Putative membrane protein	12	_	0.533769	5.61604	5.21781	5.1319	4.63475	5.01117	4.11132	4.84241	4.03028	4.97933	5.08334	5.01269	4.52507	5.90621	6.4716	5.83441	5.60035	5.99665	5.3919	5.02047	5.61133	5.67173
BP_RS01210	bp0236	_	_	MmgE/PrpD family protein	_	_	_	0.0072146	7.32037	7.56002	7.52821	7.5516	7.56338	7.19672	7.35898	7.30184	7.11777	7.49997	7.43958	7.38011	7.10219	7.3442	7.2749	7.63344	7.53476	7.61497	7.65703	7.49367	7.27707
BP_RS01215	bp0237	_	_	tripartite tricarboxylate transporter substrate binding protein	Putative exported protein	_	_	0.140572	8.6779	8.217	8.11564	7.72449	7.59556	7.45131	7.01223	7.10658	7.08362	7.46117	7.04396	7.49141	7.32717	7.70945	7.31353	7.42404	7.62597	7.28359	7.72937	7.59395	7.47835
BP_RS01220	bp0238	_	folK	2-amino-4-hydroxy-6-hydroxymethyldihydropteridine diphosphokinase	2-amino-4-hydroxy-6-hydroxymethyldihydropteridine pyrophosphokinase (EC 2.7.6.3) (6-hydroxymethyl-7,8-dihydropterin pyrophosphokinase) (7,8-dihydro-6-hydroxymethylpterin-pyrophosphokinase)	10	D	0.723343	9.73851	9.47316	9.48219	8.83211	8.83916	8.7756	8.88624	8.441	8.7418	8.71713	8.58794	8.7681	8.76861	8.88122	8.90207	8.14428	8.31419	8.54515	8.06575	8.11994	7.99526
BP_RS01225	bp0239	pcnB	pcnB	polynucleotide adenylyltransferase PcnB	Poly(A) polymerase I (PAP I) (EC 2.7.7.19)	4	A	0.913455	12.6458	12.5577	12.4835	12.0062	12.0748	12.1318	12.0628	11.9992	11.9923	12.0763	12.0518	12.0355	12.0674	11.9485	12.0013	11.5666	11.4181	11.705	11.5123	11.2588	11.0061
BP_RS01230	bp0240	_	_	HAD-IB family hydrolase	Uncharacterized protein	4	A	0.713597	11.4585	11.3793	11.2926	10.8269	10.7315	10.7478	10.7839	10.8636	10.8342	10.9186	10.7631	10.7677	10.8962	10.761	10.8953	10.3638	10.3488	10.509	10.3923	10.038	9.11775
BP_RS01235	bp0241	hda	_	DnaA regulatory inactivator Hda	AAA domain-containing protein	7	A	0.787385	12.1571	11.9341	11.9199	11.2221	10.5175	10.7772	11.0446	10.8566	10.7706	10.6254	10.6796	10.7076	10.4868	10.7509	10.7794	10.0286	10.0802	10.1203	10.0323	9.50702	8.40078
BP_RS01240	bp0242	_	purM	phosphoribosylformylglycinamidine cyclo-ligase	Phosphoribosylformylglycinamidine cyclo-ligase (EC 6.3.3.1) (AIR synthase) (AIRS) (Phosphoribosyl-aminoimidazole synthetase)	10	D	0.872974	12.1415	12.3532	12.3523	12.0018	12.2444	12.0471	11.9543	12.1301	12.0127	12.2687	12.2331	12.1165	12.4513	12.2407	12.51	11.7087	11.7478	11.7518	11.8887	11.8177	11.6717
BP_RS01245	bp0243	miaA	miaA	tRNA (adenosine(37)-N6)-dimethylallyltransferase MiaA	tRNA dimethylallyltransferase (EC 2.5.1.75) (Dimethylallyl diphosphate:tRNA dimethylallyltransferase) (DMAPP:tRNA dimethylallyltransferase) (DMATase) (Isopentenyl-diphosphate:tRNA isopentenyltransferase) (IPP transferase) (IPPT) (IPTase)	7	A	0.899391	9.47741	9.50514	9.33826	9.03507	8.74929	8.74354	8.51789	8.54108	8.60902	8.5601	8.63677	8.82175	8.84856	9.00791	8.75226	7.98415	8.06142	7.90669	7.64767	7.70029	7.51211
BP_RS01250	bp0244	mutL	mutL	DNA mismatch repair endonuclease MutL	DNA mismatch repair protein MutL	4	A	0.812863	11.2544	11.3505	11.3329	11.1312	11.1791	11.1591	11.1109	11.0479	10.9991	10.8803	10.9091	10.8272	11.1537	11.1118	11.1575	10.5857	10.583	10.7766	10.4674	10.4641	10.8016
BP_RS01255	bp0245	_	dedA	VTT domain-containing protein	Putative membrane protein	10	D	0.852735	10.469	10.4	10.3512	10.1724	9.92027	9.89033	9.74737	9.52312	9.68531	10.0235	10.0202	10.0114	10.794	10.6976	10.8127	9.76533	10.0029	9.63846	9.79659	9.50613	8.83895
BP_RS01260	bp0246	_	amiC	N-acetylmuramoyl-L-alanine amidase	N-acetylmuramoyl-L-alanine amidase (EC 3.5.1.28)	9	D	0.89247	13.241	13.3451	13.3293	13.3265	13.477	13.3955	13.2855	13.3945	13.375	13.3792	13.3908	13.3801	14.047	13.9058	14.0682	13.6796	13.4781	13.7125	13.5321	13.4477	13.7619
BP_RS01265	bp0247	_	_	bifunctional alanine racemase/tRNA (adenosine(37)-N6)-threonylcarbamoyltransferase complex ATPase subunit type 1 TsaE	t(6)A37 threonylcarbamoyladenosine biosynthesis protein TsaE (tRNA threonylcarbamoyladenosine biosynthesis protein TsaE)	10	D	0.472395	14.7657	14.4579	14.5971	14.1618	13.8672	13.9637	14.3884	13.9228	13.8985	13.5904	13.7883	13.9056	13.6623	14.3429	14.4254	14.0232	13.9275	14.1806	13.6114	13.6296	13.738
BP_RS01270	bp0248	fumC	fumC	class II fumarate hydratase	Fumarate hydratase class II (Fumarase C) (EC 4.2.1.2) (Aerobic fumarase) (Iron-independent fumarase)	1	B	0.895622	8.11791	8.22971	8.14463	9.22504	9.5922	9.35236	9.64398	9.75141	9.74697	9.69308	9.69689	9.62271	10.1587	10.1106	9.99776	10.0117	10.0038	9.80325	10.5124	10.7233	11.2634
BP_RS01275	bp0249	_	_	AEC family transporter	Putative membrane protein	_	_	0.203082	8.49441	8.52061	8.48768	9.05623	8.8139	8.94673	8.90633	8.76292	8.76033	8.8869	8.83358	8.79788	8.85497	8.89789	8.80245	8.75918	8.78588	8.70624	8.77711	8.72474	8.62846
BP_RS01280	bp0250	_	_	tripartite tricarboxylate transporter substrate binding protein BugE	Putative exported protein	5	C	0.965603	12.5599	12.7356	12.6711	12.881	13.057	13.0392	13.0318	13.2926	13.2743	13.4573	13.3048	13.3339	12.4055	12.1394	12.1268	13.5175	13.3967	13.5064	14.0009	13.7745	13.909
BP_RS01285	bp0251	_	_	LysR family transcriptional regulator	LysR family transcriptional regulator	10	D	0.513	9.39478	9.24624	9.26761	9.44484	9.26515	9.24048	9.35487	9.32296	9.42115	9.44292	9.33407	9.46479	9.5273	9.49195	9.59359	9.28172	9.25867	9.21065	9.38954	9.09676	8.59311
BP_RS01290	bp0252	ggt	ggt	gamma-glutamyltransferase	Glutathione hydrolase proenzyme (EC 2.3.2.2) (EC 3.4.19.13) [Cleaved into: Glutathione hydrolase large chain; Glutathione hydrolase small chain]	8	_	0.907026	9.22311	9.3976	9.41284	9.97021	10.134	9.98073	10.1231	10.2271	10.1824	10.2515	10.1954	10.1816	10.1787	10.1011	10.1214	10.7811	10.6049	10.6702	10.6545	10.6909	10.6972
BP_RS01295	bp0253	_	_	CoA transferase	Uncharacterized protein	_	_	0.137575	7.45232	7.38186	7.40127	7.42043	7.57575	7.85985	7.43187	7.97283	7.9493	7.49838	7.62444	7.83718	7.85169	7.81864	7.909	7.92364	7.91438	7.93432	7.66693	7.80804	7.66639
BP_RS01300	bp0254	_	_	tripartite tricarboxylate transporter substrate binding protein	Putative exported protein	12	_	0.679031	6.23796	6.17487	6.11808	5.64953	5.23204	5.31184	5.91816	5.02846	5.33152	5.42719	5.06011	5.19972	6.35041	7.30514	6.74144	5.86493	6.62759	6.30084	6.29309	6.15998	6.36437
BP_RS01305	bp0255	_	_	DNA alkylation response protein	_	_	_	0.1178	6.85549	6.86391	6.89781	7.34384	7.34116	7.53384	7.17332	7.30129	7.13202	7.10655	7.29375	7.30485	7.50091	7.56651	7.31417	7.54122	7.37974	7.3495	6.98674	7.01169	6.67347
BP_RS01315	bp0257	_	_	TonB-dependent receptor	_	_	_	0.00527246	4.25477	4.335	3.74922	4.38746	4.33924	5.1593	4.21528	4.08562	4.64467	4.29951	4.05185	3.79315	3.78422	4.7324	5.47884	3.89403	3.80419	4.56922	4.60693	4.78634	3.73257
BP_RS01320	bp0258	_	_	GbsR/MarR family transcriptional regulator	HTH-type transcriptional regulator	7	A	0.909789	12.4657	12.5867	12.4548	12.5089	12.5616	12.5077	12.3043	12.0562	11.9868	12.0595	11.9693	12.0608	12.2715	12.1712	12.3252	11.2162	11.2315	11.455	11.5186	11.0989	10.622
BP_RS01325	bp0259	_	cydA	cytochrome d ubiquinol oxidase subunit I	Cytochrome D ubiquinol oxidase subunit I (EC 1.10.3.-)	9	D	0.90803	13.3256	13.4798	13.4409	13.7543	13.8505	13.6935	13.4815	13.5677	13.5796	13.9611	13.8116	13.7926	14.256	13.9455	14.1046	13.3261	13.2034	13.3503	13.8013	13.747	14.0581
BP_RS01330	bp0260	cydB	cydB	cytochrome d ubiquinol oxidase subunit II	Cytochrome D ubiquinol oxidase subunit II (EC 1.10.3.-)	4	A	0.73727	12.0471	12.2342	12.2459	12.1661	12.3954	12.2984	12.0858	12.2337	12.2374	12.538	12.4111	12.4275	12.6899	12.3909	12.6237	11.9051	11.8271	11.9689	12.3536	12.425	12.9106
BP_RS01335	bp0261	cydX	_	cytochrome bd-I oxidase subunit CydX	Putative exported protein	9	D	0.769533	8.5166	8.56814	8.68835	8.94498	8.9598	9.04998	9.32356	8.94365	8.70369	9.25824	9.07073	9.21163	10.1522	9.92729	9.94998	9.24535	8.92781	8.86353	9.78431	9.62498	9.79795
BP_RS01340	bp0262	cydD	_	thiol reductant ABC exporter subunit CydD	Probable ATP-binding component of ABC transporter	4	A	0.859224	11.2948	11.3111	11.3077	11.0584	11.1289	11.1537	11.0406	10.9931	10.9693	10.9612	11.157	11.2317	10.5972	10.4321	10.6598	10.1336	10.2366	10.0992	10.2731	10.4577	10.2839
BP_RS01345	bp0263	cydC	_	thiol reductant ABC exporter subunit CydC	Probable ATP-binding component of ABC transporter	4	A	0.878992	11.4125	11.3219	11.3542	10.7248	10.8798	10.9498	10.7076	10.6234	10.5869	10.4958	10.8189	10.7426	10.4204	10.2682	10.4164	9.64428	9.88911	9.81816	10.1036	10.0965	10.1756
BP_RS01350	bp0264	_	apt	adenine phosphoribosyltransferase	Adenine phosphoribosyltransferase (APRT) (EC 2.4.2.7)	4	A	0.482908	10.6123	10.5592	10.5914	9.78384	9.33151	9.37603	9.32952	9.44926	9.38511	9.42811	9.42195	9.45538	9.61172	9.43107	9.44439	9.1823	9.22782	9.09011	9.39494	9.12984	8.39468
BP_RS01355	bp0265	_	_	LysR family transcriptional regulator	_	3	B	0.87897	9.53802	9.35622	9.27935	8.76013	8.98606	8.9264	9.19422	9.09156	9.12302	9.0342	8.95344	8.88946	9.37043	9.42257	9.2334	9.71427	9.67238	9.42896	9.94373	10.1356	10.5034
BP_RS01360	bp0266	_	_	DUF4148 domain-containing protein	Putative exported protein	5	C	0.283862	7.72119	7.73351	7.86429	7.73836	8.44378	8.54226	8.35708	8.37309	8.57549	7.96224	8.06112	8.01349	8.21832	8.15556	8.14537	8.27397	8.39372	8.23356	8.38358	8.39373	8.24898
BP_RS01365	bp0267	_	_	porin	_	10	D	0.936645	9.78167	9.57942	9.53798	8.95491	8.70008	8.85603	8.71685	8.64551	8.73904	8.66153	8.76312	8.74514	10.135	9.90465	10.0419	8.78269	8.86697	8.91594	8.66976	8.69143	8.94503
BP_RS01380	bp0270	_	_	DUF4224 domain-containing protein	DUF4224 domain-containing protein	12	_	0.660371	6.46397	6.43999	6.62485	6.31853	5.86346	5.68903	6.32722	6.00618	5.94725	5.93149	5.93743	5.79618	7.04134	7.0198	6.80899	6.46805	6.43871	6.14134	5.94455	6.33602	6.028
BP_RS19495	bp0271	_	_	hypothetical protein	Uncharacterized protein	4	A	0.705205	7.93089	7.81018	7.88797	7.29954	7.20669	7.37605	7.30626	7.47379	7.42236	6.80181	6.75562	6.74568	7.2469	7.43206	7.53638	6.41054	6.85461	6.89432	6.55429	6.60856	6.57349
BP_RS01395	bp0273	_	sspB	ClpXP protease specificity-enhancing factor	Stringent starvation protein B	9	D	0.400584	8.61548	8.85832	8.82893	8.99465	9.30683	9.26381	9.26157	9.50149	9.48488	9.43648	9.52443	9.39955	9.67705	9.53379	9.42326	9.17114	9.25867	9.21472	9.22132	9.41132	9.53922
BP_RS01400	bp0274	_	sspA	glutathione S-transferase N-terminal domain-containing protein	Stringent starvation protein A	9	D	0.871628	11.3582	11.614	11.6968	11.9818	12.2647	12.15	12.3614	12.4024	12.4536	12.7332	12.5532	12.5635	13.0006	12.8992	12.9118	12.5559	12.3742	12.4645	12.683	12.6684	13.0668
BP_RS01405	bp0275	_	petC	cytochrome c1	Cytochrome C1	1	B	0.669631	11.7322	11.8508	11.863	12.2941	12.4956	12.5163	12.547	12.7072	12.7867	13.137	12.9544	12.9872	12.9014	13.0968	13.1278	12.942	12.9026	13.0295	12.8819	13.0774	13.8343
BP_RS01410	bp0276	_	petB	cytochrome bc complex cytochrome b subunit	Cytochrome b	1	B	0.736534	11.0973	11.4257	11.482	11.9536	12.3947	12.2048	12.1896	12.3531	12.4202	12.8073	12.5901	12.5347	13.0112	12.6868	12.7276	12.6733	12.5654	12.636	12.7038	12.7501	13.1619
BP_RS01415	bp0277	petA	petA	ubiquinol-cytochrome c reductase iron-sulfur subunit	Ubiquinol-cytochrome c reductase iron-sulfur subunit (EC 7.1.1.8)	9	D	0.666178	10.8902	11.1389	11.1683	11.5255	11.5193	11.3954	11.5081	11.4947	11.5882	11.7558	11.7249	11.6104	12.3714	12.1601	12.1811	11.7409	11.6831	11.784	11.8728	11.642	10.8831
BP_RS01420	bp0278	mscL	mscL	large conductance mechanosensitive channel protein MscL	Large-conductance mechanosensitive channel	10	D	0.407903	10.5255	10.5467	10.5136	10.484	10.3731	10.3197	10.5912	10.3976	10.378	10.6538	10.5177	10.6369	10.6859	10.5977	10.5486	10.3973	10.3871	10.3502	10.5337	10.4062	10.6277
BP_RS01425	bp0279	_	_	Nif3-like dinuclear metal center hexameric protein	Uncharacterized protein	4	A	0.594645	10.2278	10.1543	10.2097	10.0787	10.2274	10.2025	10.0426	10.0601	10.1104	10.0538	10.0721	10.082	10.1002	10.051	10.2002	9.88805	9.959	9.92531	9.80675	9.93747	9.87552
BP_RS01430	bp0280	_	degQ	trypsin-like peptidase domain-containing protein	Protease (EC 3.4.21.-)	7	A	0.365486	9.00875	8.90236	9.01989	8.77023	9.00758	8.91305	8.75063	8.80541	8.94483	9.07978	8.92222	8.94774	9.01283	8.99409	9.0186	8.78552	8.91381	8.70497	8.77415	8.79591	8.25331
BP_RS01440	bp0282	_	_	FMN-binding negative transcriptional regulator	Putative regulatory protein	4	A	0.296945	8.30196	8.3626	8.42866	8.61102	8.1716	7.95383	7.97964	7.8832	7.88472	8.11408	8.20526	8.16359	8.10177	8.28468	8.0645	8.03525	8.06142	8.26671	7.99328	7.82588	7.45804
BP_RS01445	bp0283	_	_	glyoxylate/hydroxypyruvate reductase A	Putative 2-hydroxyacid dehydrogenase	_	_	0.110976	7.21415	7.41904	7.44047	7.13596	7.0945	7.1324	6.8411	7.19773	7.10583	6.79673	6.88812	6.96446	7.35147	7.62225	7.15021	7.04079	7.32753	7.01282	7.1535	6.92783	7.03075
BP_RS01450	bp0284	_	_	ABC transporter substrate-binding protein	Probable extracellular solute-binding protein, family 5	3	B	0.617277	6.03054	5.7075	5.90985	5.64148	6.14626	5.73373	6.0568	6.33222	5.84056	5.94901	6.17383	6.04948	6.4183	6.62955	6.21945	6.69025	6.82952	6.61589	6.60243	6.5809	7.31582
BP_RS01455	bp0285	_	_	alpha/beta hydrolase	Putative acetyl esterase	_	_	0.0147809	4.06452	5.10776	5.2898	5.29088	5.30316	5.31902	5.46579	5.63987	5.3893	4.58193	5.60914	5.23844	5.13335	5.29916	5.20565	5.29034	5.69938	5.49446	5.53087	5.48289	5.63074
BP_RS01460	bp0286	_	_	helix-turn-helix transcriptional regulator	Probable transcriptional regulator	5	C	0.860014	6.60174	6.62559	6.6068	6.94596	7.18795	7.37545	7.41692	7.50935	7.57149	7.49044	7.57111	7.28758	6.66181	6.83224	6.96015	7.81679	8.00802	7.70676	8.31123	8.82373	8.70594
BP_RS01465	bp0287	_	leuA	2-isopropylmalate synthase	2-isopropylmalate synthase (EC 2.3.3.13)	8	_	0.479291	5.8417	5.78452	6.13415	7.42804	7.45431	7.42967	7.20159	7.36579	7.20601	7.05781	6.82256	6.71179	6.79547	6.61777	6.58324	7.17193	6.92515	6.60984	6.80154	7.179	7.77104
BP_RS01470	bp0288	_	_	helix-turn-helix transcriptional regulator	Probable transcriptional regulator	7	A	0.891093	7.28108	7.40166	7.41106	7.90781	8.26392	8.20407	8.30458	8.06867	8.03338	7.47143	7.4041	7.47835	6.80818	7.38505	6.94398	6.784	6.85632	6.6287	6.302	6.75765	6.67705
BP_RS01475	bp0289	ilvD	ilvD1	dihydroxy-acid dehydratase	Dihydroxy-acid dehydratase 1 (DAD 1) (EC 4.2.1.9)	4	A	0.803322	12.001	12.1242	12.1689	12.3592	12.2664	12.2401	12.2054	12.3277	12.2927	12.1927	12.138	12.1811	12.0675	11.8467	11.9171	11.663	11.5401	11.7828	11.7005	11.2875	10.5839
BP_RS01480	bp0290	_	_	MFS transporter	Probable transporter	4	A	0.978606	8.77401	8.84548	8.85031	10.0905	10.2966	10.4109	10.4984	10.6723	10.5364	9.55661	9.71205	9.68917	7.94625	8.09577	8.06843	7.07459	7.39614	7.01282	6.64764	6.30513	6.83752
BP_RS01485	bp0291	_	_	LysR family transcriptional regulator	Probable LysR-family transcriptional regulator	9	D	0.444338	7.58618	7.50838	7.64496	7.61846	7.86889	8.04814	8.14056	8.27475	7.89504	7.6866	8.0967	7.91235	8.20877	8.54466	8.37196	8.10715	8.37789	8.03133	8.0754	8.06666	7.60889
BP_RS01490	bp0292	_	_	Gfo/Idh/MocA family oxidoreductase	_	5	C	0.902479	8.15853	8.27278	8.31805	8.79816	8.98933	9.04517	8.89523	8.90255	8.85747	8.67643	8.55843	8.64692	8.68492	8.83124	8.51574	9.62113	9.55707	9.35972	9.705	9.83316	10.3557
BP_RS01495	bp0294	_	_	5'-3'-deoxyribonucleotidase	Putative 5'(3')-deoxyribonucleotidase (EC 3.1.3.-)	8	_	0.561296	8.82296	8.97879	8.92524	9.35146	9.20494	9.22829	9.21588	9.29441	9.16745	9.58633	9.54339	9.5951	9.27889	9.04975	9.1728	9.18895	9.0411	8.99192	9.31794	9.04005	8.62846
BP_RS01505	bp0296	_	_	hypothetical protein	Uncharacterized protein	5	C	0.630135	9.00778	9.05136	9.27306	9.26912	9.1031	8.9679	9.05849	8.68105	8.58314	9.08	8.60631	9.1577	8.61638	8.46627	8.14076	9.18674	9.14635	9.04767	9.11702	9.0374	9.03001
BP_RS01515	bp0298	_	_	hypothetical protein	Uncharacterized protein	5	C	0.430355	8.41969	8.17721	8.28261	8.55472	8.90121	8.84161	8.61239	8.62784	8.44676	8.20349	8.48182	8.18706	8.07319	8.08972	8.05564	8.61842	8.45171	8.50662	8.21285	8.49892	8.66283
BP_RS01520	bp0299	_	_	MarR family transcriptional regulator	MarR-family transcriptional regulator	5	C	0.637403	7.66111	7.75987	7.62805	8.08088	8.1172	8.03439	7.907	8.03697	8.15716	7.95694	7.95097	8.07219	8.14508	7.88975	7.80943	8.58182	8.32752	8.46302	8.36612	8.31986	8.88749
BP_RS01525	bp0300	_	_	alpha/beta hydrolase	Putative esterase	5	C	0.788445	8.87225	8.98465	8.97394	9.04511	9.41924	9.39024	9.20733	9.27417	9.35416	9.21331	9.27906	9.3658	9.04905	9.19044	8.96641	9.92758	9.72452	9.6699	9.62125	9.76697	10.3745
BP_RS01530	bp0301	_	_	ABC transporter substrate-binding protein	Putative ABC transporter substrate binding protein	5	C	0.960934	11.272	11.4857	11.3614	10.9358	11.2856	11.3234	11.4084	11.4569	11.4662	11.6441	11.4592	11.5079	10.4207	10.3953	10.3459	11.8439	11.8239	11.6272	12.4772	12.7886	13.2982
BP_RS01535	bp0302	_	_	branched-chain amino acid ABC transporter permease	Probable branched-chain amino acid transport system, permease component	5	C	0.916527	8.50707	8.53131	8.50589	8.25826	8.67906	8.6276	8.67837	8.75629	8.62695	8.46852	8.4858	8.44362	7.36347	6.82474	6.86786	8.42986	8.52454	8.47806	8.79765	9.12662	9.76957
BP_RS01540	bp0303	_	_	branched-chain amino acid ABC transporter permease	Probable branched-chain amino acid transport system, permease component	5	C	0.926645	8.59225	8.62334	8.48725	8.5741	8.31315	8.45033	8.47102	8.41053	8.36139	8.28447	8.35027	8.58464	6.72825	6.79224	6.79795	8.30805	8.38	8.20774	8.59125	8.78916	9.46797
BP_RS01545	bp0304	_	_	ABC transporter ATP-binding protein	Putative branched-chain amino acid transporter, ATP-binding protein	5	C	0.967043	8.75646	8.84175	8.93036	8.88803	8.71415	8.70366	8.73196	8.69998	8.56234	8.61265	8.62044	8.4358	6.88217	6.97707	6.86029	8.50129	8.50747	8.54297	8.96165	8.94047	9.42586
BP_RS01550	bp0305	_	_	ABC transporter ATP-binding protein	High-affinity branched-chain amino acid transporter, ATP-binding protein	5	C	0.962134	7.90614	8.13871	8.00939	8.34163	8.06067	8.18163	8.21293	8.12217	8.16856	7.98676	7.96791	8.15258	6.5634	6.45611	6.57983	7.67359	7.8949	7.78044	8.5536	8.74081	8.48284
BP_RS01555	bp0306	_	_	bifunctional salicylyl-CoA 5-hydroxylase/oxidoreductase	_	3	B	0.808248	6.60907	6.77669	6.71759	6.94179	7.33979	7.39139	7.34608	7.16798	7.15083	7.15901	7.38021	7.43515	8.29682	8.76507	8.15733	8.18225	8.72112	7.95245	7.77065	8.59696	8.36708
BP_RS01560	bp0308	_	_	SDR family oxidoreductase	_	3	B	0.308512	4.35635	4.489	4.55828	4.5109	4.57681	4.57131	4.80468	4.21075	4.31467	4.3217	4.82144	4.55948	4.88279	5.02508	4.62014	5.20164	5.05991	5.20393	4.85111	5.30864	5.82495
BP_RS01565	bp0309	_	_	enoyl-CoA hydratase family protein	Putative enoyl-CoA hydratase/isomerase	2	B	0.502321	6.59496	6.59033	6.51161	6.35091	6.54125	6.17554	6.50729	6.4634	6.62454	6.52223	6.19523	6.23506	6.61236	6.6565	6.61684	6.72404	7.10515	6.98933	6.49152	7.18858	6.53158
BP_RS01570	bp0310	_	_	acyl-CoA dehydrogenase family protein	Putative acyl-CoA dehydrogenase	_	_	0.0843961	4.56675	4.678	4.03782	4.43118	4.37963	4.29481	4.46531	3.89034	4.81086	4.13823	4.13995	4.0127	3.5743	3.89597	4.10782	5.01458	4.5817	4.34581	4.63653	4.00288	4.82999
BP_RS01575	bp0311	_	_	AMP-binding protein	Probable acid-coenzyme A ligase	_	_	0.047785	4.79335	4.82436	4.97735	4.63475	4.84095	4.58721	4.86392	4.905	4.76846	4.18601	4.62829	3.74292	3.43678	5.07344	4.03446	4.84467	5.66909	4.94188	4.80362	4.64055	5.90044
BP_RS01580	bp0312	_	_	acyl-CoA thioesterase	Probable 4-hydroxybenzoyl CoA thioesterase	_	_	0.028839	4.16892	3.40138	4.24761	3.93599	3.70332	4.9015	3.88009	3.69864	3.98496	3.24756	3.63611	3.5045	3.91039	3.68679	4.13277	3.75809	4.45618	3.62875	3.88961	3.86013	4.12022
BP_RS01585	bp0313	_	_	RidA family protein	Uncharacterized protein	_	_	0.0341845	5.24493	5.1033	5.02912	4.23954	4.08792	4.17614	4.02073	4.24608	4.52543	3.49647	3.90913	4.00479	4.51243	4.54863	4.02375	4.00042	4.40341	3.81957	4.55088	5.01031	4.32185
BP_RS01590	bp0314	_	_	DUF342 domain-containing protein	Uncharacterized protein	7	A	0.805685	9.25986	9.11141	9.28787	9.05732	8.84014	8.86954	8.98224	8.8631	8.74965	8.91304	8.81297	8.93157	7.97709	8.25413	8.30184	8.30805	8.46043	8.27488	8.46484	8.30094	7.9634
BP_RS01595	bp0315	hemL	hemL	glutamate-1-semialdehyde 2%2C1-aminomutase	Glutamate-1-semialdehyde 2,1-aminomutase (GSA) (EC 5.4.3.8) (Glutamate-1-semialdehyde aminotransferase) (GSA-AT)	9	D	0.513422	10.4491	10.4987	10.6348	10.5726	10.5479	10.5434	10.3975	10.636	10.5283	10.6754	10.5879	10.6586	10.916	10.778	11.0058	10.4776	10.4992	10.5651	10.5679	10.7188	11.2509
BP_RS01600	bp0316	_	thiE	thiamine phosphate synthase	Thiamine-phosphate synthase (TP synthase) (TPS) (EC 2.5.1.3) (Thiamine-phosphate pyrophosphorylase) (TMP pyrophosphorylase) (TMP-PPase)	7	A	0.488239	10.3713	10.2418	10.1198	10.0031	9.77221	9.836	9.5648	10.0502	9.61933	9.56506	9.68135	9.73387	9.44979	9.90076	9.81646	9.52141	9.50338	9.79825	9.21752	9.16376	9.31935
BP_RS01605	bp0317	_	thiD	hydroxymethylpyrimidine/phosphomethylpyrimidine kinase	Phosphomethylpyrimidine kinase (EC 2.7.4.7)	7	A	0.281401	10.4715	10.5284	10.5498	10.1851	10.2011	10.3446	10.1491	10.0665	10.0221	10.1979	10.2393	10.1528	10.3014	10.2823	10.2861	10.0259	9.9399	9.99546	9.89059	9.88506	10.2225
BP_RS01610	bp0318	_	rubA	rubredoxin	Rubredoxin	2	B	0.755638	10.7587	10.6658	10.5886	10.6729	10.9381	11.102	10.7105	10.4839	10.4527	10.3042	10.2653	10.4933	10.6953	10.8998	10.8251	10.8953	11.0141	10.7042	10.8991	11.2422	11.1602
BP_RS01615	bp0319	_	_	YqgE/AlgH family protein	UPF0301 protein BP0319	2	B	0.791898	10.7028	10.74	10.4967	10.7531	10.837	10.6949	10.373	10.4626	10.4264	10.3196	10.2405	10.2181	10.6035	10.5925	10.4682	10.5301	10.4542	10.4534	10.7322	10.8979	10.9344
BP_RS01620	bp0320	ruvX	_	Holliday junction resolvase RuvX	Putative pre-16S rRNA nuclease (EC 3.1.-.-)	4	A	0.639631	8.56216	8.44732	8.35196	8.17059	7.72353	7.78406	7.53885	7.27577	7.11586	6.81701	7.05528	7.15764	7.33937	7.58462	7.32959	6.88919	7.18307	7.24607	6.91948	6.94917	6.87165
BP_RS01625	bp0321	_	pyrB	aspartate carbamoyltransferase catalytic subunit	Aspartate carbamoyltransferase (EC 2.1.3.2) (Aspartate transcarbamylase) (ATCase)	4	A	0.502553	10.1935	10.15	10.0131	10.1084	9.38984	9.33026	9.23657	9.1958	9.1933	9.29705	9.21549	9.35092	8.97511	9.15822	9.01012	9.05214	8.90049	9.18354	9.22915	9.01871	8.82539
BP_RS01630	bp0322	_	pyrC	dihydroorotase	Dihydroorotase	4	A	0.648082	8.39065	8.22072	8.25202	8.1723	8.15627	8.34549	7.94179	8.16819	8.23917	7.6852	8.0967	8.15955	7.52979	7.41693	7.41155	7.68695	7.58503	7.73236	7.66503	7.69827	7.95411
BP_RS01635	bp0323	_	_	1-acyl-sn-glycerol-3-phosphate acyltransferase	Acyltransferase	7	A	0.777012	9.38787	9.45263	9.36242	8.72805	8.60525	8.66931	8.43941	8.52053	8.61999	8.55729	8.64522	8.74051	8.60922	8.56005	8.41366	8.03271	8.10869	8.03559	8.13196	7.80804	7.63976
BP_RS01640	bp0324	_	apaH	symmetrical bis(5'-nucleosyl)-tetraphosphatase	Bis(5'-nucleosyl)-tetraphosphatase, symmetrical (EC 3.6.1.41) (Ap4A hydrolase) (Diadenosine 5',5'''-P1,P4-tetraphosphate pyrophosphohydrolase) (Diadenosine tetraphosphatase)	_	_	0.163261	10.4449	10.4243	10.4905	10.7801	10.7048	10.7015	10.8039	10.8073	10.6741	10.7092	10.6556	10.7169	10.7844	10.5642	10.6709	10.708	10.6419	10.7555	10.6746	10.5617	10.3745
BP_RS01645	bp0325	lptG	_	LPS export ABC transporter permease LptG	Putative membrane protein	4	A	0.609133	11.7732	11.6375	11.6069	11.8895	11.5416	11.5337	11.5757	11.558	11.4115	11.6363	11.6345	11.6416	11.3828	11.3676	11.3727	11.5049	11.3824	11.4443	11.2376	10.846	10.3861
BP_RS01650	bp0326	mtgA	mtgA	monofunctional biosynthetic peptidoglycan transglycosylase	Biosynthetic peptidoglycan transglycosylase (EC 2.4.1.129) (Glycan polymerase) (Peptidoglycan glycosyltransferase MtgA) (PGT)	12	_	0.631744	9.60708	9.49288	9.54805	9.37659	9.26003	9.34451	9.28922	9.25215	9.14462	9.25983	9.08903	9.05617	9.42425	9.8006	9.73657	9.43047	9.49645	9.48994	9.24288	9.33071	9.13538
BP_RS01660	bp0328	_	_	hypothetical protein	Uncharacterized protein	_	_	0.0444821	5.29992	5.56946	5.32931	5.09154	5.11573	5.35424	5.68148	5.13386	5.19737	4.89037	5.15052	4.96899	5.17357	5.76042	5.17184	5.72794	5.63846	5.19276	4.91512	5.61133	5.56801
BP_RS01665	bp0329	_	_	ATP-dependent acyl-CoA ligase	Putative coenzyme A ligase	5	C	0.288152	6.6838	7.01941	6.94258	6.8166	7.04361	6.81583	6.88467	6.77857	6.70456	6.62433	6.81009	6.78314	6.90601	6.96254	6.60873	7.34252	7.04102	7.31916	6.92627	7.13866	7.60698
BP_RS01670	bp0330	_	_	tripartite tricarboxylate transporter substrate binding protein	Uncharacterized protein	5	C	0.470852	4.79582	4.78914	4.83978	5.16532	5.261	5.0425	5.53634	4.97377	4.77369	5.73391	5.21107	5.30701	4.67647	5.1887	4.78929	5.87081	5.63846	5.61774	5.93809	5.64173	6.5528
BP_RS01675	bp0331	_	_	Zn-ribbon domain-containing OB-fold protein	Uncharacterized protein	_	_	0.148042	4.13553	3.55186	3.08432	2.68924	4.25088	3.00082	2.50757	3.11598	3.44333	2.49293	2.77496	4.00479	4.01847	3.62784	3.69458	4.6011	4.10252	4.33922	3.31844	3.65112	5.20503
BP_RS01680	bp0332	_	_	thiolase domain-containing protein	Uncharacterized protein	_	_	0.157552	7.22103	7.19518	7.22367	6.85169	7.20404	7.07749	7.17332	7.17798	7.32353	6.77654	6.86258	6.81964	6.48634	7.08128	6.57545	7.05056	7.21433	7.20884	7.08362	6.80826	6.5071
BP_RS01685	bp0333	_	_	MBL fold metallo-hydrolase	Metallo-beta-lactamase family protein	5	C	0.920481	8.58591	8.83018	8.9261	9.25302	9.52899	9.25892	9.6227	9.71416	9.63035	9.99457	9.89957	9.74657	9.0331	9.00696	8.90856	9.94995	9.80234	9.88637	10.2021	10.1356	10.4921
BP_RS01690	bp0334	_	_	tripartite tricarboxylate transporter substrate binding protein	Putative exported protein	5	C	0.953097	8.19137	8.16327	8.31514	8.59921	8.85208	8.8793	9.03581	9.15602	9.05127	9.33433	9.36396	9.29799	8.15331	8.21887	8.1753	9.47859	9.42239	9.40315	9.8187	9.89928	10.1998
BP_RS01700	bp0335	_	_	hypothetical protein	_	7	A	0.739536	10.1127	10.2063	10.1993	10.6049	10.7468	10.7172	10.1472	10.2107	10.3411	10.1121	10.2818	10.1812	10.341	10.2329	10.257	10.2238	10.263	10.3549	10.026	10.3454	10.3776
BP_RS01705	bp0336	_	_	DUF3300 domain-containing protein	_	7	A	0.57912	10.5254	10.527	10.4299	11.0857	10.9499	11.0054	10.3663	10.5936	10.4981	10.2452	10.3295	10.4238	10.1946	10.319	10.3957	10.5081	10.3336	10.6497	10.1431	10.3348	10.7139
BP_RS01710	bp0337	_	_	DUF2950 family protein	Putative exported protein	5	C	0.531064	10.3032	10.2599	10.2789	10.8666	10.6932	10.8041	10.2106	10.5298	10.5079	10.428	10.6105	10.4815	10.4656	10.3323	10.4032	10.6874	10.6315	10.6687	10.5153	10.6565	10.9832
BP_RS01715	bp0338	_	_	GGDEF domain-containing protein	Putative membrane protein	4	A	0.743483	9.06717	8.99428	8.74961	8.92913	8.62735	8.75584	8.83104	8.6211	8.59885	8.18469	8.53967	8.48209	8.86873	8.87281	8.74572	8.27397	8.57437	8.46542	8.10205	7.8524	8.0699
BP_RS01720	bp0339	_	ogt	methylated-DNA--[protein]-cysteine S-methyltransferase	Methylated-DNA--protein-cysteine methyltransferase (EC 2.1.1.63)	2	B	0.646307	5.75631	5.64954	6.05196	6.37062	6.3267	6.62779	6.381	6.4634	6.26665	6.4307	6.35491	6.28695	6.85265	7.04094	6.95593	6.55582	7.04488	6.80831	6.90605	7.18858	7.59684
BP_RS01725	bp0340	alkB	alkB	DNA oxidative demethylase AlkB	Alkylated DNA repair protein	3	B	0.277581	6.21861	6.01595	6.33975	6.45885	6.78707	6.6791	6.45455	6.53972	6.57399	6.19806	6.65506	6.51284	6.29731	6.79635	6.67678	6.9037	6.90509	6.79701	6.57549	6.99462	7.48771
BP_RS01730	bp0341	_	_	2OG-Fe(II) oxygenase	Fe2OG dioxygenase domain-containing protein	2	B	0.290496	5.85041	5.24769	5.26082	5.90406	6.27083	6.50631	5.89682	5.9845	6.23617	5.65317	5.91479	5.65975	5.67599	6.24641	5.7846	6.27191	6.4252	6.55993	6.38694	6.0591	6.52957
BP_RS01735	bp0342	_	_	DUF523 domain-containing protein	Uncharacterized protein	_	_	0.176832	6.35428	6.60807	6.31125	6.5596	6.84858	7.04032	6.39553	6.62742	6.74884	6.35842	6.22488	6.5638	6.32389	6.36309	6.34858	6.56948	6.45968	6.4144	6.57359	6.7439	7.06057
BP_RS01740	bp0343	_	hmuV, bhuV	heme ABC transporter ATP-binding protein	Hemin import ATP-binding protein HmuV (EC 7.6.2.-)	2	B	0.420312	6.32845	6.34258	6.58432	6.77749	6.8017	6.77949	6.65235	6.92804	6.95641	6.47714	6.8498	6.54265	6.84564	7.08128	6.73725	7.36459	7.01899	6.78755	7.30434	7.29598	7.25371
BP_RS01745	bp0344	_	bhuU	iron ABC transporter permease	Putative hemin permease	2	B	0.374184	6.63012	6.47907	6.7421	6.85955	6.9148	6.76102	6.53127	6.71231	6.69411	6.79725	6.65506	6.56552	6.52992	6.92382	6.73432	6.76113	6.93914	6.81203	7.1597	7.1981	7.44679
BP_RS01750	bp0345	_	bhuT	ABC transporter substrate-binding protein	Putative hemin binding protein	1	B	0.565501	6.69172	6.51458	6.53145	7.2042	7.07832	7.21354	6.85008	7.31458	7.14341	7.14585	7.35914	7.26483	6.95254	7.4326	7.42574	7.60229	7.63324	7.63415	7.55625	7.65011	8.09658
BP_RS01755	bp0346	_	bhuS	hemin-degrading factor	Putative hemin transport protein	3	B	0.888667	8.28498	8.40031	8.27176	8.82874	9.10664	8.91521	8.90174	9.05562	8.96739	8.94978	8.96221	9.02982	9.32962	9.48277	9.4175	9.61424	9.52015	9.51603	9.75733	9.79695	10.1533
BP_RS01760	bp0347	_	bhuR	TonB-dependent receptor	Outer membrane heme receptor	3	B	0.935817	7.85332	7.91154	7.91127	8.17952	8.01991	8.0448	8.29978	8.5717	8.34233	8.46953	8.42187	8.43271	8.75305	8.7769	8.68709	8.60463	8.73637	8.8071	9.37524	9.45572	9.61374
BP_RS01765	bp0348	_	hurR	DUF4880 domain-containing protein	Heme uptake transmembrane sensor	1	B	0.803076	5.53348	5.66905	5.65788	6.4847	6.15216	6.24071	6.98148	7.17798	6.48268	6.78354	7.13212	7.164	6.66668	6.99945	6.59363	6.88564	7.13617	6.94771	7.94012	8.08521	8.07197
BP_RS01770	bp0349	_	hurI	sigma-70 family RNA polymerase sigma factor	Heme uptake regulator	2	B	0.902621	5.35202	5.11138	4.93365	5.64148	5.95357	5.81107	7.03401	6.99806	6.58879	6.81365	6.84963	6.80956	8.43046	9.65288	8.48212	8.09348	8.96608	7.53559	8.5811	9.04533	8.60504
BP_RS01775	bp0350	_	_	hypothetical protein	Uncharacterized protein	9	D	0.63357	9.56736	9.32231	9.4821	10.0732	10.6939	11.3085	10.6578	11.0683	11.0668	10.9332	10.8197	10.8325	11.1297	11.574	11.6992	10.9748	10.7194	10.7848	10.6601	10.3753	10.0277
BP_RS01780	bp0351	_	_	(2Fe-2S)-binding protein	Putative ferredoxin	5	C	0.823084	4.12233	4.28163	4.77873	4.81642	5.16648	5.32647	6.29514	6.168	5.88584	6.32663	6.06181	6.12268	4.95452	3.62784	4.91377	6.62286	6.52763	6.07616	7.08156	7.77193	6.73025
BP_RS01785	bp0352	_	_	hypothetical protein	Uncharacterized protein	5	C	0.773561	4.43761	4.8286	4.62032	4.7517	5.24237	5.18763	6.29148	6.4575	5.87191	6.29322	6.03833	6.10306	4.61993	4.48991	3.97309	5.86493	5.90354	6.02655	6.80182	6.75785	6.67347
BP_RS01790	bp0353	_	_	(2Fe-2S)-binding protein	Putative ferredoxin	5	C	0.878751	4.89296	5.41681	5.44024	6.28499	6.81815	7.13804	7.34597	7.48326	7.24618	7.57856	7.61001	7.67925	4.97325	5.29916	4.95041	7.56937	7.28829	7.20024	8.42108	8.24462	7.97847
BP_RS01795	bp0354	_	_	ornithine cyclodeaminase family protein	Probable ornithine cyclodeaminase	5	C	0.858006	6.29425	6.41386	6.68916	7.06786	7.41551	7.2356	7.21557	7.46307	7.50954	7.31186	7.83267	7.33038	5.90621	6.39477	6.34858	7.22468	7.44269	7.29662	7.78716	7.94332	7.8654
BP_RS01805	bp0356	_	_	GntR family transcriptional regulator	GntR-family transcription regulator	_	_	0.201381	9.54861	9.64222	9.7829	9.83363	10.4195	10.6862	10.0754	10.4268	10.4651	10.0848	10.186	10.1325	10.2818	10.113	10.3024	10.3676	10.2774	10.4059	10.2102	10.2975	11.1185
BP_RS01810	bp0357	_	_	sulfite exporter TauE/SafE family protein	Probable membrane transporter protein	4	A	0.416482	9.08261	9.06982	9.1567	9.06825	9.76085	10.0112	9.5648	9.63106	9.56371	9.08954	9.17455	9.22497	9.29703	9.2295	9.35333	9.48223	9.55862	9.55148	9.0668	9.29663	9.41771
BP_RS01815	bp0358	_	_	hypothetical protein	Putative membrane protein	3	B	0.588159	7.35031	7.03151	7.14386	7.13448	7.20669	7.48938	7.31821	7.13145	7.12868	7.04443	7.17426	7.23877	7.57358	7.92343	7.30213	7.72332	7.72879	7.56167	7.58298	8.05208	7.79617
BP_RS01820	bp0359	_	_	iron-containing redox enzyme family protein	Uncharacterized protein	5	C	0.932496	6.63709	6.68756	6.86929	7.8677	8.33133	8.20552	8.15842	8.38688	8.4519	8.68372	8.70523	8.531	7.26063	7.35246	7.22768	9.19557	9.16419	9.14154	9.31466	9.8218	10.1798
BP_RS01825	bp0360	_	_	aldehyde dehydrogenase family protein	Probable aldehyde dehydrogenase (EC 1.2.1.3)	5	C	0.924486	7.0262	7.06134	7.29034	7.89688	8.20924	8.11602	8.04159	8.09259	8.2719	8.53999	8.28886	8.26983	6.87009	7.19161	7.16747	8.78508	8.77893	8.72372	9.09186	9.06066	9.64391
BP_RS01830	bp0361	_	_	heme-binding protein	Uncharacterized protein	6	_	0.81779	5.44471	5.83347	5.50293	6.30206	6.44817	6.16946	6.45455	6.37311	6.52329	6.94462	6.41176	6.69909	5.61347	6.08554	5.92302	7.22112	7.01899	6.97805	7.13058	7.46564	8.07197
BP_RS01835	bp0362	_	_	2Fe-2S iron-sulfur cluster binding domain-containing protein	CDP-6-deoxy-delta-3,4-glucoseen reductase (EC 1.17.1.-)	5	C	0.768421	6.03326	6.17119	6.30001	6.63509	6.65597	6.2926	6.4829	6.59798	6.62837	6.62448	6.58386	6.9323	6.22213	6.58527	6.42	7.2588	7.19579	7.12232	7.28386	7.5029	7.7398
BP_RS01840	bp0363	_	_	ABC transporter substrate-binding protein	Probable extracellular solute-binding protein	9	D	0.276336	8.67175	8.84548	8.65533	9.22526	9.23079	9.2333	9.03581	9.17767	9.23573	9.14831	9.21487	9.19313	9.53642	9.317	9.4086	9.35419	9.16653	9.223	9.24074	9.32552	9.41988
BP_RS01845	bp0364	_	_	beta-propeller fold lactonase family protein	Putative exported protein	4	A	0.842094	10.67	10.841	10.6775	11.2465	10.5538	10.437	10.1569	9.87587	9.97431	10.2558	10.168	10.3186	10.8301	10.7517	10.799	9.71973	9.91993	9.68488	9.9107	9.63342	8.9996
BP_RS01850	bp0365	_	_	IS481-like element IS481 family transposase	Transposase	11	_	0.870224	6.30273	6.74397	6.55754	8.1025	8.00611	8.04122	6.78982	6.93965	7.08735	6.48915	6.84511	7.03159	7.52175	7.39403	7.46963	6.4116	6.10746	6.27382	6.83694	6.58221	6.88369
BP_RS01855	bp0366	_	_	universal stress protein	_	13	_	0.929199	11.1363	11.3722	10.8166	12.0611	12.5543	12.6469	11.4883	11.4895	11.4893	11.1375	11.1496	11.256	11.9839	12.2306	12.3322	11.1145	11.1409	11.1054	11.1253	11.2765	11.6177
BP_RS01860	bp0367	_	_	trimeric intracellular cation channel family protein	Putative membrane protein	7	A	0.736796	9.56292	9.32707	9.29379	8.35148	8.06888	8.39523	8.50143	8.04792	8.20417	8.1875	8.3569	8.09222	7.66437	8.00464	7.97667	7.58729	7.61132	7.53916	7.31469	7.65011	7.44378
BP_RS01865	bp0368	gdhA	gdhA	NADP-specific glutamate dehydrogenase	Glutamate dehydrogenase	4	A	0.812312	12.7898	12.8157	12.8058	10.6616	10.7994	10.7698	10.5172	10.6428	10.6149	10.7609	10.5664	10.6926	11.051	10.7399	10.7866	10.2452	10.1248	10.0208	10.0208	9.70354	8.91633
BP_RS01870	bp0369	xth	_	exodeoxyribonuclease III	Exodeoxyribonuclease III (EC 3.1.11.2)	9	D	0.724801	9.90441	10.125	10.1772	10.4226	10.4742	10.2881	10.2618	10.5005	10.5665	10.7536	10.65	10.6381	10.9821	10.7991	10.9268	10.6029	10.56	10.7327	10.7418	10.5735	10.5903
BP_RS01875	bp0370	pyrE	pyrE	orotate phosphoribosyltransferase	Orotate phosphoribosyltransferase (OPRT) (OPRTase) (EC 2.4.2.10)	9	D	0.320807	9.84058	9.87943	9.92692	10.0742	10.3414	10.2863	10.2479	10.3545	10.3751	10.5761	10.483	10.3868	10.7387	10.5449	10.7109	10.6214	10.4533	10.4534	10.7791	10.5131	9.79352
BP_RS01880	bp0371	gatB	gatB	Asp-tRNA(Asn)/Glu-tRNA(Gln) amidotransferase subunit GatB	Aspartyl/glutamyl-tRNA(Asn/Gln) amidotransferase subunit B (Asp/Glu-ADT subunit B) (EC 6.3.5.-)	4	A	0.925809	12.2975	12.3402	12.3223	11.9568	11.9171	11.9909	11.8546	11.9034	11.8783	11.9911	11.8566	11.9376	11.9198	11.8351	11.9218	11.1642	11.1375	11.3959	11.4098	11.1533	11.3473
BP_RS01885	bp0372	gatA	gatA	Asp-tRNA(Asn)/Glu-tRNA(Gln) amidotransferase subunit GatA	Glutamyl-tRNA(Gln) amidotransferase subunit A (Glu-ADT subunit A) (EC 6.3.5.7)	4	A	0.901623	11.4972	11.4876	11.5166	11.077	11.2919	11.1897	11.0661	11.2042	11.2289	11.2632	11.251	11.2089	10.9265	10.9498	11.0281	10.4514	10.3417	10.6205	10.5017	10.3667	9.9332
BP_RS01890	bp0373	gatC	gatC	Asp-tRNA(Asn)/Glu-tRNA(Gln) amidotransferase subunit GatC	Aspartyl/glutamyl-tRNA(Asn/Gln) amidotransferase subunit C (Asp/Glu-ADT subunit C) (EC 6.3.5.-)	4	A	0.770442	10.5113	10.476	10.6123	10.495	10.1883	10.2312	10.3613	10.016	10.2991	10.6407	10.7574	10.9427	10.6396	10.6723	10.6747	9.6795	9.60281	9.69718	10.0502	9.59293	8.68135
BP_RS01895	bp0374	_	mreB	rod shape-determining protein	Cell shape-determining protein MreB	10	D	0.651434	13.0062	13.042	13.0668	12.7734	12.2947	12.3023	12.5504	12.5477	12.5197	12.8574	12.828	12.8635	13.1439	13.013	13.1492	12.3029	12.2279	12.4715	12.467	11.9125	10.6219
BP_RS01900	bp0375	mreC	mreC	rod shape-determining protein MreC	Cell shape-determining protein MreC (Cell shape protein MreC)	4	A	0.879816	11.2802	11.2103	11.1605	10.5891	10.3089	10.3353	10.3615	10.2913	10.2155	10.2597	10.1668	10.2497	10.3049	10.2458	10.4207	9.76698	9.80812	9.92062	9.3407	9.24273	8.50652
BP_RS01905	bp0376	mreD	mreD	rod shape-determining protein MreD	Rod shape-determining protein MreD	4	A	0.922159	10.3176	10.2535	10.2183	9.41697	9.52193	9.52871	9.4186	9.38822	9.23245	9.23683	9.03002	9.41517	9.48323	9.32319	9.36086	8.68278	8.55503	8.61551	8.68919	8.40651	8.30633
BP_RS01910	bp0377	mrdA	mrdA	penicillin-binding protein 2	Peptidoglycan D,D-transpeptidase MrdA (EC 3.4.16.4) (Penicillin-binding protein 2) (PBP-2)	7	A	0.946442	11.9391	11.7973	11.7771	11.1857	11.1684	11.1581	10.9716	10.9596	10.8203	10.8811	10.7903	10.8255	10.7787	10.69	10.774	10.3128	10.207	10.3667	10.1364	10.0453	9.85082
BP_RS01915	bp0378	rodA	mrdB, rodA	rod shape-determining protein RodA	Peptidoglycan glycosyltransferase MrdB (PGT) (EC 2.4.1.129) (Cell elongation protein RodA) (Cell wall polymerase) (Peptidoglycan polymerase) (PG polymerase)	7	A	0.96063	11.0055	10.9614	10.9252	10.5419	10.3769	10.2596	10.0222	9.90794	10.0543	9.88276	9.86783	9.87617	10.8611	10.7993	10.8519	9.41407	9.45767	9.69568	9.38929	9.23152	9.13187
BP_RS01920	bp0379	_	ldh	Ldh family oxidoreductase	Putative L-lactate dehydrogenase (EC 1.1.1.27)	9	D	0.972444	12.1675	12.222	11.8987	13.2214	12.8074	12.8126	12.3748	12.513	12.5755	13.0084	13.0135	12.9754	14.5232	14.3789	14.4641	13.0033	12.7763	13.0754	12.9408	12.93	13.2253
BP_RS01925	bp0380	_	_	DASS family sodium-coupled anion symporter	Putative Sodium:sulfate symportert	9	D	0.975392	12.8105	12.822	12.5187	13.7403	13.8855	13.9453	12.8513	13.162	13.2119	13.4468	13.405	13.3025	15.0413	15.0192	15.0654	13.4185	13.3403	13.4732	13.4403	13.3852	13.7615
BP_RS01930	bp0381	slmA	_	nucleoid occlusion factor SlmA	Putative TetR-family transcriptional regulator	4	A	0.846259	10.3285	10.453	10.4454	10.0274	9.8952	9.90266	9.96099	9.81654	9.7664	9.66947	9.58084	9.67072	10.0599	10.0498	10.1143	9.53539	9.63865	9.62766	9.50343	9.35018	9.08258
BP_RS01935	bp0382	_	_	pyrimidine 5'-nucleotidase	Putative hydrolase	4	A	0.870842	10.9896	11.0292	11.0333	10.6819	10.0374	9.9129	9.96099	9.74859	9.77999	10.1548	10.0363	10.0265	9.81353	9.76013	9.86235	9.32181	9.26292	9.53168	8.96983	8.73024	8.05516
BP_RS01940	bp0383	argB	argB	acetylglutamate kinase	Acetylglutamate kinase (EC 2.7.2.8) (N-acetyl-L-glutamate 5-phosphotransferase) (NAG kinase) (NAGK)	4	A	0.839114	11.4648	11.6864	11.6897	11.5545	11.5559	11.422	11.0912	11.1595	11.2406	11.6639	11.5704	11.5648	11.7599	11.5541	11.6674	11.2014	11.1413	11.2564	11.2042	10.9168	10.6075
BP_RS01945	bp0385	_	_	MetQ/NlpA family ABC transporter substrate-binding protein	Putative exported protein	9	D	0.885351	11.1264	11.3281	11.3418	11.4157	11.6786	11.6832	11.7579	11.8551	11.8757	12.0717	11.9869	12.065	12.4342	12.4403	12.4653	12.1179	11.9552	12.0086	12.1461	11.975	11.8481
BP_RS01950	bp0386	_	_	TlpA family protein disulfide reductase	Putative thioredoxin	12	_	0.890138	10.8897	10.8605	10.8599	10.7993	10.7364	10.6569	10.6306	10.4412	10.4335	10.5295	10.4405	10.5063	10.8572	10.7579	10.6735	10.5619	10.5172	10.5931	11.0751	10.9908	11.1473
BP_RS01955	bp0387	_	_	BON domain-containing protein	Putative exported protein	2	B	0.814843	11.3368	11.3486	11.3054	11.0201	11.3352	11.3191	10.973	11.0868	11.0575	11.0882	11.0048	11.0344	11.2394	11.058	11.2828	11.1951	11.1922	11.283	11.6502	11.7891	12.2619
BP_RS01960	bp0388	_	gmhA	phosphoheptose isomerase	Phosphoheptose isomerase (EC 5.3.1.28) (Sedoheptulose 7-phosphate isomerase)	7	A	0.517613	11.2795	11.2176	11.1357	10.8511	10.4794	10.3968	10.6817	10.5129	10.3551	10.4068	10.172	10.3675	10.3105	10.4623	10.3808	10.1564	10.047	10.2582	10.3625	10.095	10.184
BP_RS01965	bp0389	_	_	YraN family protein	_	_	_	0.0761124	2.79033	3.55186	3.70989	3.43822	4.50123	3.97614	2.93457	4.16808	3.56565	3.74803	2.36667	2.512	3.39885	2.87031	2.97059	2.58534	2.99702	4.29791	2.86442	3.12543	3.02492
BP_RS01970	bp0390	rsmI	rsmI	16S rRNA (cytidine(1402)-2'-O)-methyltransferase	Ribosomal RNA small subunit methyltransferase I (EC 2.1.1.198) (16S rRNA 2'-O-ribose C1402 methyltransferase) (rRNA (cytidine-2'-O-)-methyltransferase RsmI)	4	A	0.287342	9.52618	9.50243	9.36746	9.04889	9.25259	9.24255	8.69556	9.05035	9.06712	8.95253	9.06683	8.98094	8.91763	8.84045	8.9228	8.86812	8.96374	8.89719	9.13632	9.06367	9.10146
BP_RS01975	bp0391	_	ogt	methylated-DNA--[protein]-cysteine S-methyltransferase	Methylated-DNA--protein-cysteine methyltransferase (EC 2.1.1.63) (6-O-methylguanine-DNA methyltransferase) (MGMT) (O-6-methylguanine-DNA-alkyltransferase)	4	A	0.574098	8.54572	8.57705	8.32891	8.11116	8.22275	8.20329	8.01516	8.18293	8.19073	7.9683	8.04443	8.16359	8.0232	7.80196	8.05852	7.82362	7.82457	7.85462	7.83536	7.88805	7.48028
BP_RS01985	bp0393	_	_	DMT family transporter	_	_	_	0.119218	7.10992	7.05394	7.08392	6.96557	7.0537	7.29048	7.04686	6.85604	7.01068	6.57329	6.91573	7.09781	7.15837	6.84401	6.80899	6.89322	7.19629	7.17411	6.50586	6.87763	6.70651
BP_RS01990	bp0394	_	_	LysE family translocator	Putative membrane protein	10	D	0.729339	8.29387	7.9238	7.89967	7.28453	7.39902	7.25414	7.22314	7.12734	7.23851	6.42814	6.8498	6.74568	7.65467	7.8436	7.85675	7.21272	7.26571	7.10464	7.04681	7.30551	7.22399
BP_RS01995	bp0395	_	_	alpha/beta fold hydrolase	Putative exported protein	4	A	0.848083	10.9485	10.7709	10.6158	9.80366	9.53344	9.72651	8.84747	8.93763	8.84387	8.96086	8.90179	8.87521	8.90159	8.75741	8.86954	9.34997	9.5044	9.21684	9.25587	9.49692	9.78346
BP_RS02000	bp0396	_	_	multidrug/biocide efflux PACE transporter	Putative membrane protein	4	A	0.939651	11.9727	11.7516	11.6916	10.8233	10.4206	10.5474	9.2368	9.12662	9.26902	9.1875	9.52252	9.51574	8.43489	8.39037	8.54575	9.41773	9.73605	9.70775	8.99045	8.98386	8.8876
BP_RS02005	bp0397	_	_	ChbG/HpnK family deacetylase	Uncharacterized protein	7	A	0.985595	14.3411	14.3665	14.2898	14.1165	14.1011	14.0892	12.4833	12.627	12.6779	12.6186	12.7312	12.8596	11.043	10.6579	10.6952	13.0984	13.0329	13.1434	12.4372	12.3378	12.7969
BP_RS02015	bp0398	_	_	glycosyltransferase family 39 protein	Putative membrane protein	7	A	0.990901	14.7046	14.6775	14.7068	14.04	13.944	14.0349	12.6063	12.5349	12.5327	12.2671	12.5218	12.6503	10.3896	10.1974	10.3396	12.8137	12.7774	12.9325	12.0952	12.0448	12.3532
BP_RS02020	bp0399	_	_	glycosyltransferase family 2 protein	Putative glycosyl transferase	7	A	0.99365	14.525	14.5108	14.5735	14.1318	13.9736	14.0472	12.9318	12.9168	12.9111	12.7755	12.921	13.0822	10.7249	10.8732	10.7525	13.274	13.1299	13.2828	12.5413	12.6697	12.5524
BP_RS02025	bp0400	_	_	GNAT family N-acetyltransferase	_	7	A	0.736629	8.87632	8.5976	8.82079	8.64237	8.66203	8.639	8.60729	8.46973	8.57988	8.696	8.5888	8.59576	8.2752	8.43622	8.23171	8.12844	8.0999	8.14335	8.09614	7.90319	7.11076
BP_RS02030	bp0401	_	_	IS481-like element IS481 family transposase	_	_	_	0.0328045	2.53893	3.49179	3.41151	3.43822	3.03836	3.90461	3.45522	2.80568	3.60317	3.3056	3.55914	4.23845	2.50559	3.29823	4.30787	3.93735	4.08426	2.16941	4.61833	4.44715	4.29001
BP_RS02035	bp0402	gltS	gltS	sodium/glutamate symporter	Sodium/glutamate symporter	3	B	0.879628	8.61504	8.54193	8.46906	8.99977	9.10482	9.08705	8.67837	8.76954	8.92056	8.83643	8.90674	8.94284	9.19911	9.39151	9.41606	9.71359	9.62219	9.6175	9.62115	9.97417	10.3919
BP_RS02040	bp0403	_	_	TAXI family TRAP transporter solute-binding subunit	Putative exported protein	3	B	0.897976	9.38349	9.28794	9.42536	9.79497	9.65805	9.64523	9.48559	9.51375	9.51696	9.64277	9.53014	9.70591	10.1433	9.91698	9.8602	10.2429	10.1781	10.1831	10.2554	10.5498	10.8419
BP_RS02045	bp0404	_	atoE	short-chain fatty acid transporter	Putative short-chain fatty acids transporter	5	C	0.862368	10.4453	10.6151	10.5241	10.2905	10.3862	10.2492	9.97208	10.1555	10.1601	10.3235	10.072	10.1816	9.85023	9.9692	9.64701	10.2951	10.4179	10.197	10.5398	10.6429	10.8612
BP_RS02050	bp0405	_	_	hypothetical protein	Putative membrane protein	13	_	0.493915	6.7099	6.94986	6.6068	6.86799	7.33821	7.7194	6.78982	6.7852	6.72109	6.30925	6.53083	6.28695	7.29067	7.28498	7.14125	6.6284	7.0157	6.87433	6.68791	7.44132	6.42095
BP_RS02060	bp0406	dnaQ	dnaQ	DNA polymerase III subunit epsilon	DNA polymerase III subunit epsilon (EC 2.7.7.7)	7	A	0.307215	10.2103	10.2073	10.1706	10.3669	10.3448	10.362	10.1848	10.2037	10.2007	10.3706	10.3087	10.3092	10.5843	10.3218	10.3068	10.4267	10.3711	10.4384	10.4628	10.0984	9.50617
BP_RS02065	bp0407	_	_	efflux RND transporter permease subunit	_	4	A	0.466016	10.1115	9.89918	9.72822	10.0449	9.395	9.27116	9.39269	9.08994	9.02166	9.20562	9.23054	9.25084	9.1594	9.32147	8.92553	9.11939	9.20826	9.21889	9.11664	8.87481	8.52478
BP_RS02075	bp0409	_	_	GTP-binding protein	_	3	B	0.843253	10.0355	9.88674	9.87058	10.0621	10.298	10.3526	10.1807	9.92586	9.9589	9.72036	9.4298	9.73546	10.4512	10.7593	10.451	10.7189	10.8679	10.5808	10.519	10.7427	11.1567
BP_RS02080	bp0410	_	_	universal stress protein	Putative universal stress protein	8	_	0.748476	10.8664	11.0348	10.852	12.1434	12.6832	12.6154	12.0996	12.1655	12.0352	11.8833	11.7464	11.7901	12.4873	12.1953	12.1805	12.1965	12.0741	12.1239	12.4559	12.4753	12.9689
BP_RS02085	bp0411	_	_	TIGR01244 family phosphatase	DUF442 domain-containing protein	2	B	0.532678	9.50267	9.45074	9.49926	9.63041	10.2799	10.2986	10.0999	10.2848	10.0393	9.82092	9.7087	9.82482	9.89299	10.1331	10.164	10.3627	10.4652	10.4525	10.0068	10.4497	10.7544
BP_RS02090	bp0412	_	_	PLP-dependent aminotransferase family protein	Putative GntR-family transcriptional regulator	12	_	0.661268	7.75653	7.79694	7.59851	7.50941	7.54075	7.60752	7.55815	7.34679	7.25309	6.98544	7.05097	6.89941	8.03825	8.42842	7.76745	7.66726	7.99096	7.52877	7.24788	7.71826	7.09432
BP_RS02095	bp0413	fusA	_	elongation factor G	_	2	B	0.460786	7.05592	6.77439	6.68524	6.68611	7.116	6.89399	7.33623	6.48389	6.69348	6.13742	6.66295	6.04258	7.04134	7.42147	6.99803	7.32472	7.48847	6.71947	6.9411	7.16935	7.2573
BP_RS02100	bp0414	_	_	MgtC/SapB family protein	Protein MgtC	5	C	0.551669	7.0651	6.99265	7.33596	7.4982	7.99491	8.01686	7.84381	7.66464	7.85716	7.35968	7.63285	7.36373	7.04447	7.37032	7.18453	7.80458	7.89143	7.7529	7.54881	8.07414	8.28101
BP_RS02105	bp0415	_	_	TerC family protein	Putative membrane protein	2	B	0.761593	8.24658	8.02599	7.88797	7.70578	7.84328	7.66104	7.83479	7.63468	7.51878	7.50979	7.46622	7.4407	7.88852	8.0845	7.79701	8.37911	8.12132	7.89736	8.3895	8.56207	8.83597
BP_RS02110	bp0416	_	_	CoA transferase	Uncharacterized protein	3	B	0.689019	6.57026	6.60807	6.52386	6.75941	6.08574	6.59465	6.56579	6.1879	6.34763	6.4983	6.41176	6.21693	6.63353	7.05057	6.76189	7.20426	7.19629	6.98933	7.25236	7.21743	7.51302
BP_RS02115	bp0417	_	_	crotonase/enoyl-CoA hydratase family protein	Probable enoyl-CoA hydratase (EC 4.2.1.17)	2	B	0.383311	5.71786	4.82796	4.99322	5.07089	4.95722	5.23662	4.97559	4.84813	5.28951	5.15431	4.82144	4.72259	5.29244	4.71418	5.10042	5.57896	5.61138	5.42562	5.56956	5.84947	5.78814
BP_RS02120	bp0418	_	_	tripartite tricarboxylate transporter substrate binding protein	Putative exported protein	3	B	0.475887	5.93303	5.81627	5.67613	6.07023	5.51136	5.49829	5.89966	5.22616	5.40689	5.1927	5.38929	5.49339	5.49917	6.01068	5.58542	6.10015	6.16657	5.93833	6.23137	6.31522	6.70651
BP_RS02125	bp0419	_	_	LysR family transcriptional regulator	LysR-family transcriptional regulator	6	_	0.420053	8.55173	8.46963	8.45256	8.59584	8.85073	9.21695	8.84747	8.79895	8.5683	8.26294	8.16925	8.47829	8.52588	8.61823	8.69223	8.52201	8.94492	8.78476	8.63757	8.77125	8.31929
BP_RS02130	bp0420	_	_	acyl-CoA dehydrogenase family protein	Probable acyl-CoA dehydrogenase	5	C	0.508828	6.76024	6.7586	6.75546	7.33397	7.17529	6.79807	6.79618	6.6402	6.79674	6.54619	6.90496	6.91595	6.48634	6.84071	6.50881	7.16535	7.42498	7.22409	6.91129	7.36137	7.19616
BP_RS02135	bp0421	_	_	acyl-CoA dehydrogenase	Putative acyl-CoA dehydrogenase	_	_	0.198125	3.89283	4.85874	4.29561	4.67009	4.27999	4.77378	4.84241	4.58309	4.59487	4.6968	5.14156	4.68801	3.78422	4.40593	4.48353	5.42845	4.9967	5.33775	4.80547	5.33322	5.45405
BP_RS02140	bp0422	_	_	acetyl-CoA C-acyltransferase	Probable thiolase	3	B	0.444434	4.29355	5.16383	4.95074	5.67502	5.27887	5.19811	5.27264	5.92882	5.51339	5.36031	5.69208	5.83403	6.16843	6.18902	5.58105	6.04441	6.4229	6.01894	6.14084	6.03899	6.61626
BP_RS02145	bp0423	_	_	AMP-binding protein	_	3	B	0.634963	6.99107	6.86391	7.01727	7.49104	7.17529	6.98125	7.04592	6.96044	7.1003	7.14589	7.03924	7.35546	7.32264	7.32753	7.22393	7.77173	7.73808	7.84091	7.80348	8.01612	8.21207
BP_RS02155	bp0425	_	_	LysR family transcriptional regulator	Probable LysR-family transcriptional regulator	_	_	0.245225	9.00502	8.96501	8.89579	8.59966	8.45019	8.27737	8.59543	8.32602	8.36629	8.21681	8.16404	8.25364	8.45192	8.40079	8.32562	8.63888	8.70316	8.46898	8.34542	8.57525	8.0699
BP_RS02160	bp0426	_	cspA	cold-shock protein	Cold shock protein	12	_	0.507179	7.57979	7.65253	7.64558	7.24199	7.33979	7.77006	7.02106	6.88368	6.96296	6.73169	6.49803	6.77799	7.45603	7.49977	7.31353	7.55501	7.60089	7.26447	6.89166	7.57466	7.2573
BP_RS02165	bp0427	_	_	hypothetical protein	Putative exported protein	12	_	0.349096	7.05434	7.03903	7.07342	7.18004	7.27549	6.89724	7.2653	7.08552	6.87335	6.93995	6.64734	7.03159	7.46316	7.53385	7.35201	7.15247	7.34535	7.03689	7.30449	7.15557	7.0169
BP_RS02170	bp0428	_	_	GntR family transcriptional regulator	Putative GntR-family transcriptional regulator	_	_	0.142016	8.0794	8.14593	8.3392	8.89934	9.35688	9.38924	9.22949	9.25779	9.17934	9.0393	8.97902	8.807	9.25123	9.0404	9.0618	9.19777	9.11615	9.28122	8.96007	9.14222	9.40614
BP_RS02175	bp0429	pruA	_	L-glutamate gamma-semialdehyde dehydrogenase	L-glutamate gamma-semialdehyde dehydrogenase (EC 1.2.1.88)	_	_	0.0849752	6.88508	6.76767	7.08392	7.37969	7.43989	7.25637	7.14627	7.3731	7.45558	7.39123	7.26845	7.41234	7.61504	7.2645	7.14125	7.24184	7.23481	7.54913	7.62814	7.57215	7.74941
BP_RS02180	bp0430	_	_	short-chain fatty acid transporter	Short-chain fatty acids transporter	8	_	0.575331	7.19117	6.86569	7.09611	7.4099	7.80446	7.6533	7.38554	7.6399	7.73125	7.82875	7.74541	7.61979	7.8968	7.90107	7.7556	7.91334	7.71086	7.68313	8.05593	8.08564	8.70221
BP_RS02185	bp0431	_	_	molybdopterin-dependent oxidoreductase	Putative molybdopterin oxidoreductase	_	_	0.0278854	8.27227	8.28037	8.40815	8.17075	8.26392	8.34799	8.19858	8.28396	8.24464	8.07507	8.29765	8.22738	8.05177	8.21	8.21236	8.23715	8.21578	8.04578	8.11597	8.19218	8.23975
BP_RS02190	bp0432	_	_	RidA family protein	Uncharacterized protein	1	B	0.56731	3.52683	3.80904	4.50984	5.21353	5.48036	5.69243	5.54679	5.33296	5.3357	5.32287	5.49912	5.40586	5.70346	5.93785	5.73834	6.13615	5.8793	5.84436	5.97764	6.08886	6.77503
BP_RS02195	bp0433	_	_	LysR family transcriptional regulator	Probable LysR-family transcriptional regulator	_	_	0.0810457	8.2539	8.34074	8.47482	8.69285	8.68751	8.57066	8.83586	8.82499	8.79896	8.83661	8.70523	8.88659	8.72332	8.61515	8.69544	8.7945	8.82692	8.8748	8.75481	8.85289	8.70594
BP_RS02205	bp0434	_	_	tripartite tricarboxylate transporter substrate binding protein	_	5	C	0.569847	5.99309	6.01595	5.70995	5.58509	5.98862	5.57544	5.89682	5.52165	5.89015	6.29326	6.38885	5.89072	5.29762	5.68389	5.5905	6.6359	6.50443	6.11309	6.4624	6.7156	6.61436
BP_RS02210	bp0435	_	_	CoA transferase	Putative dehydratase/racemase	10	D	0.544434	6.92476	6.89278	6.47656	6.21677	6.22319	6.07528	5.4709	5.87092	5.82767	6.00448	6.06181	6.23517	6.40162	6.85948	6.82541	6.02534	6.26343	6.18828	5.96735	5.95064	5.76205
BP_RS02215	bp0436	_	_	MaoC family dehydratase	MaoC-like domain-containing protein	12	_	0.412656	6.72478	6.80341	6.80084	6.68611	6.08895	6.36224	6.83088	6.16881	6.16066	6.52822	5.86209	6.30553	7.00868	7.20149	6.75301	6.95499	6.84621	6.68766	6.99894	6.65728	6.30112
BP_RS02220	bp0437	_	_	LysR family transcriptional regulator	LysR-family transcriptional regulator	3	B	0.734125	7.04013	7.33606	7.08029	7.67278	7.88697	7.9716	7.47508	7.70541	7.69575	7.79392	7.81617	7.80731	7.97709	8.24186	7.69252	8.278	8.38838	8.17723	8.27401	8.40651	8.62839
BP_RS02225	bp0438	_	_	CoA transferase	Uncharacterized protein	3	B	0.867732	7.54703	7.81437	7.7981	8.12934	8.24592	8.39593	8.12168	8.01758	8.23824	8.13237	8.13232	8.23871	8.49073	8.58391	8.50898	8.99362	8.99096	8.93892	8.9136	9.14222	9.55557
BP_RS02230	bp0439	_	_	IS481-like element IS481 family transposase	_	_	_	0.00368918	0	0	0	0	0.817346	0	0	0	0	1.02861	0	0	0	0	0	0.900473	0	0	0	0	0
BP_RS02235	bp0440	_	_	acyl-CoA dehydrogenase family protein	_	3	B	0.847815	5.54197	5.76648	5.69415	6.47363	6.95029	6.85149	6.90618	6.30185	6.31469	6.4863	6.42993	6.40882	6.89414	6.97707	7.1736	7.69536	7.75604	7.56757	7.82396	8.31734	9.1597
BP_RS02240	bp0441	_	_	MerR family DNA-binding transcriptional regulator	MerR-family transcriptional regulator	3	B	0.707254	9.23742	9.08261	9.06883	9.52763	10.0903	10.2388	10.3892	10.1965	10.1673	9.49897	9.52527	9.53416	10.0114	10.2872	10.1047	10.6793	10.5271	10.8206	10.3078	10.7012	11.7217
BP_RS02245	bp0442	_	_	MBL fold metallo-hydrolase	Metallo-beta-lactamase family protein	3	B	0.722989	9.8629	9.87839	10.0229	10.0887	10.6432	10.8435	10.4442	10.422	10.4597	10.2198	10.1041	10.1612	10.3397	10.4085	10.5154	10.9815	10.9472	11.0365	10.7752	11.0759	11.7477
BP_RS02255	bp0444	_	_	acyl-CoA dehydrogenase family protein	_	12	_	0.509968	8.31716	8.43205	8.3325	8.69061	8.23136	8.08782	8.08343	8.08281	7.88758	8.18894	7.82306	7.99718	8.43489	8.66119	8.32148	8.41783	8.6314	8.39836	8.29977	8.34779	8.15532
BP_RS02260	bp0445	aceK	_	bifunctional isocitrate dehydrogenase kinase/phosphatase	_	_	_	0.153673	7.07987	7.05864	6.66835	7.12564	6.87838	6.67223	6.87396	6.72109	6.49598	6.93239	6.62499	6.52119	6.7649	7.1791	6.86029	7.00102	6.98531	6.89568	7.13412	6.95024	6.53158
BP_RS02265	bp0447	_	_	acetyl-CoA C-acyltransferase	Acetyl-CoA acetyltransferase (EC 2.3.1.9)	5	C	0.254901	8.36555	8.43292	8.44305	8.50845	8.28758	8.13194	8.42027	8.34235	8.13039	8.42103	8.4036	8.20736	8.34099	8.2184	8.1026	8.46975	8.53662	8.53528	8.4758	8.26288	8.72186
BP_RS02270	bp0448	_	accB	methylcrotonoyl-CoA carboxylase	Carboxyltransferase subunit of acetyl-CoA carboxylase (EC 6.4.1.4)	_	_	0.0923319	7.12154	7.0326	7.01498	6.19877	6.03966	6.21923	6.53127	5.88463	6.50951	5.99415	5.93743	6.14622	6.0629	6.65439	5.9675	6.72404	6.54252	6.48115	6.75428	6.62721	6.26073
BP_RS02275	bp0449	_	accA	acetyl/propionyl/methylcrotonyl-CoA carboxylase subunit alpha	Biotin carboxylase subunit of acetyl-CoA carboxylase (EC 6.4.1.4)	_	_	0.0430323	7.92026	7.58226	7.5548	7.23714	6.84858	7.04252	6.73087	7.03333	7.02518	7.22004	7.11973	7.14142	7.08232	7.19161	6.92353	6.85052	6.98531	6.9579	6.85103	6.57971	7.0898
BP_RS02280	bp0450	_	_	DUF1653 domain-containing protein	DUF1653 domain-containing protein	4	A	0.463175	6.66466	6.69711	6.84996	6.9489	7.41418	7.1406	7.34608	7.4473	7.20297	7.13201	7.09169	7.02118	7.42201	6.77191	6.73725	6.82998	6.53579	6.5634	6.71821	6.5965	6.84837
BP_RS02285	bp0451	_	argD2	acetylornithine transaminase	Acetylornithine aminotransferase 2 (ACOAT 2) (EC 2.6.1.11)	8	_	0.359146	10.9212	11.0614	11.1052	11.1839	11.3719	11.2982	11.2107	11.349	11.3305	11.5679	11.463	11.4523	11.5074	11.4164	11.5143	11.446	11.3038	11.3423	11.4953	11.5316	11.2181
BP_RS02290	bp0452	_	_	tripartite tricarboxylate transporter substrate binding protein	Putative exported protein	_	_	0.121366	9.20726	9.12631	9.05843	8.79816	8.53094	8.50414	8.49123	8.37397	8.51137	8.64277	8.73857	8.64013	8.58984	8.69286	8.6109	8.59757	8.60898	8.43657	8.43686	8.50457	8.32084
BP_RS02295	bp0453	_	_	DSD1 family PLP-dependent enzyme	Low-specificity D-threonine aldolase	3	B	0.796851	7.7433	7.94802	7.9801	8.57925	8.62863	8.63226	8.50888	8.39877	8.38121	8.47615	8.50527	8.57506	8.68907	8.43316	8.57544	9.08103	8.94018	8.78476	8.84515	9.27859	9.32551
BP_RS02300	bp0454	_	_	TAXI family TRAP transporter solute-binding subunit	Putative exported protein	5	C	0.942781	11.2028	11.6103	11.7639	12.0808	12.3512	12.3066	12.4288	12.5795	12.6418	12.94	12.7962	12.7401	12.2818	12.1528	12.2363	12.9987	12.8754	12.9532	13.4396	13.5943	14.0174
BP_RS02305	bp0455	_	_	TRAP transporter permease	Putative membrane protein	5	C	0.926136	9.99003	10.4871	10.6211	10.6596	11.0325	10.9178	10.8323	10.9468	11.0158	11.2137	11.0824	11.0394	10.073	9.77729	9.85207	11.0868	10.9637	10.9513	11.3429	11.385	12.0031
BP_RS02310	bp0456	_	hemC	TonB-dependent hemoglobin/transferrin/lactoferrin family receptor	Putative heme receptor	1	B	0.873171	8.23164	8.44239	8.31116	9.015	9.07641	9.03679	9.89875	9.77284	9.57732	9.80276	9.61696	9.62463	9.42425	9.49325	9.56482	9.68862	9.69017	9.80971	10.3959	10.3677	9.77564
BP_RS02315	bp0457	_	smg	DUF494 domain-containing protein	Protein Smg homolog	2	B	0.564789	10.7622	10.6992	10.7387	10.7232	11.4816	11.6572	11.4829	11.4332	11.3361	10.5869	10.5674	10.7802	11.3002	11.4543	11.4203	11.5296	11.551	11.5694	11.0469	11.3587	12.0994
BP_RS02320	bp0458	gluQRS	_	tRNA glutamyl-Q(34) synthetase GluQRS	_	7	A	0.677861	9.79966	9.67526	9.57546	9.92765	9.5255	9.60839	8.92152	9.1021	9.23708	9.06581	9.0156	9.08208	9.1575	9.10051	9.15993	9.00467	9.02211	8.97698	8.90039	9.0995	9.22042
BP_RS02325	bp0459	_	_	GDYXXLXY domain-containing protein	Putative membrane protein	_	_	0.0422948	11.3951	11.341	11.3156	11.2412	11.1591	11.1695	11.2286	11.1378	11.148	11.0338	11.1023	11.1552	11.2039	11.1349	11.2021	11.1575	11.0946	11.088	11.0656	11.128	11.0762
BP_RS02330	bp0460	_	topB	DNA topoisomerase III	DNA topoisomerase (EC 5.6.2.1)	1	B	0.75614	13.7918	13.9417	13.9919	13.9848	14.0954	14.0698	14.2783	14.2516	14.2085	14.3385	14.2462	14.2269	14.284	14.2208	14.2574	14.3312	14.2371	14.4447	14.4079	14.3409	14.5668
BP_RS02335	bp0461	_	_	ABC transporter substrate-binding protein	Putative exported protein	7	A	0.458857	10.8376	10.7443	10.7016	10.2412	9.87871	9.78313	9.89894	9.96365	9.81625	9.75164	9.76128	9.7452	9.53189	9.72255	9.68885	9.79771	9.78613	9.85946	9.8663	9.83863	9.97882
BP_RS02340	bp0462	_	_	ABC transporter ATP-binding protein	ABC-transporter, ATP-binding component	4	A	0.722942	9.5985	9.39751	9.18517	8.62261	8.36109	8.48067	8.40274	8.37491	8.26238	8.30463	8.22043	8.27422	7.86171	8.14163	8.05526	7.95027	7.9095	8.25176	7.94992	7.79239	7.82403
BP_RS02345	bp0463	_	_	ABC transporter permease	ABC transporter, permease component	4	A	0.528089	9.7084	9.57904	9.52028	8.83736	8.29581	8.36339	8.32679	8.21237	8.25462	8.06152	7.93199	8.23421	7.91862	8.18756	7.94447	8.26252	7.95257	8.22336	7.9181	7.64262	7.31687
BP_RS02350	bp0464	_	idnO	SDR family oxidoreductase	Gluconate 5-dehydrogenase (EC 1.1.1.69)	2	B	0.81478	9.62854	9.51326	9.52	9.46141	9.5275	9.54742	9.39031	9.34653	9.38548	9.18813	9.08351	9.1164	9.03925	9.0956	8.97643	9.5459	9.38098	9.62231	9.55876	9.61225	9.56562
BP_RS02355	bp0465	_	_	aldehyde dehydrogenase family protein	Probable aldehyde dehydrogenase	2	B	0.932704	8.93553	8.8652	8.84788	9.21077	9.16144	9.03837	9.22949	9.13085	9.23588	9.30175	9.18058	9.12537	10.4478	10.1237	10.2759	10.2934	10.4197	10.2975	10.7481	11.1135	11.8248
BP_RS02360	bp0466	_	_	SDR family oxidoreductase	Alcohol dehydrogenase	3	B	0.938048	7.79882	7.57046	7.43525	8.1238	8.05927	8.08004	7.9541	8.09259	8.27751	8.21741	8.11709	8.10289	8.65108	8.45936	8.52246	9.33605	9.28135	9.29861	9.67546	9.88876	10.6831
BP_RS02365	bp0467	ilvB	_	biosynthetic-type acetolactate synthase large subunit	Acetolactate synthase (EC 2.2.1.6)	12	_	0.496528	7.87154	7.40166	7.32545	7.18026	7.06467	7.29106	7.1907	6.92804	7.24766	6.7562	7.06266	6.78314	7.38717	7.80196	7.1969	7.30258	7.84015	7.34546	7.19725	7.58672	7.81379
BP_RS02370	bp0468	_	_	Lrp/AsnC family transcriptional regulator	AsnC-family transcriptional regulator	10	D	0.609456	8.51524	8.60658	8.49552	8.24053	8.15387	8.09535	7.71362	7.75322	8.06173	7.68851	8.01577	7.88497	8.37515	8.91983	8.57196	8.26992	8.45171	8.04829	7.83771	8.14521	7.37738
BP_RS02375	bp0469	_	_	bestrophin	Putative membrane protein	7	A	0.775212	9.58033	9.60219	9.60881	9.29848	9.20229	9.17233	9.0127	8.95805	8.91902	8.81731	8.77083	8.84093	8.84766	9.00937	8.78893	8.87878	8.90349	8.80236	8.60922	8.68352	8.55694
BP_RS02380	bp0470	_	_	SET domain-containing protein-lysine N-methyltransferase	Uncharacterized protein	4	A	0.481786	9.32344	9.43037	9.48836	9.13176	8.42762	8.47314	8.84051	8.72721	8.67697	9.05191	8.95948	8.80397	9.02008	8.80705	8.79098	8.70991	8.48042	8.45107	8.64406	8.08445	6.45204
BP_RS02385	bp0471	_	ribB	3%2C4-dihydroxy-2-butanone-4-phosphate synthase	3,4-dihydroxy-2-butanone 4-phosphate synthase (DHBP synthase) (EC 4.1.99.12)	11	_	0.628378	8.16553	7.4644	7.27642	6.65316	6.32861	6.16134	6.14518	6.12736	6.03703	6.09168	5.88876	5.87806	6.91061	7.55223	6.84296	6.29506	6.69707	6.40963	6.27884	6.43574	6.26073
BP_RS02390	bp0472	_	_	nucleoside 2-deoxyribosyltransferase	_	_	_	0.005572	3.02619	3.58028	2.07503	3.17799	2.01744	2.54506	0	1.54469	1.95871	1.32934	2.63154	1.50464	2.34819	2.88667	1.4381	0.922199	1.99745	1.82614	0	2.76447	1.94701
BP_RS02400	bp0474	_	_	linear amide C-N hydrolase	Choloylglycine hydrolase (EC 3.5.1.24)	12	_	0.748168	10.1561	9.85516	9.55999	8.318	8.10572	8.12142	8.47336	8.05313	7.97571	7.60889	7.45627	7.74251	8.59618	8.95744	8.59272	8.246	8.63685	8.27895	8.17361	8.50352	8.63125
BP_RS02405	bp0475	_	rne	Rne/Rng family ribonuclease	Ribonuclease E (RNase E) (EC 3.1.26.12)	4	A	0.948975	16.0134	15.815	15.6551	14.3795	14.2142	14.2266	13.9151	14.0224	14.0361	14.0651	13.945	13.9027	13.0689	13.0951	13.1453	12.9041	12.9711	13.1063	12.9651	12.6959	12.4155
BP_RS02410	bp0477	_	rluC	RluA family pseudouridine synthase	Pseudouridine synthase (EC 5.4.99.-)	4	A	0.786656	11.1152	11.209	11.1407	10.5399	10.0545	10.148	10.3071	10.2235	10.1411	10.3586	10.2845	10.3201	10.6375	10.4244	10.4724	9.85532	9.66163	9.8509	9.85236	9.62056	9.07454
BP_RS02415	bp0478	_	_	HAD family hydrolase	Probable hydrolase	6	_	0.811267	10.4691	10.6044	10.6066	10.0212	10.4009	10.2736	10.2281	10.2794	10.3072	10.4079	10.3989	10.3446	10.8517	10.6715	10.8259	10.1089	10.0004	10.0149	10.2569	10.2064	9.82434
BP_RS02420	bp0479	msrP	msrP	protein-methionine-sulfoxide reductase catalytic subunit MsrP	Protein-methionine-sulfoxide reductase catalytic subunit MsrP (EC 1.8.5.-)	2	B	0.847085	10.4381	10.5258	10.5586	10.6189	10.8742	10.8144	10.3356	10.527	10.6121	10.7348	10.5851	10.4762	11.1471	11.0631	11.2229	10.9911	10.8007	10.8773	11.3101	11.5121	12.0804
BP_RS02425	bp0480	msrQ	msrQ	protein-methionine-sulfoxide reductase heme-binding subunit MsrQ	Protein-methionine-sulfoxide reductase heme-binding subunit MsrQ (Flavocytochrome MsrQ)	12	_	0.600396	8.71113	8.81947	8.80045	8.71641	8.57798	8.61113	8.3709	8.1292	8.53227	8.395	8.46494	8.4358	8.67557	8.55305	8.70506	8.52337	8.52136	8.40047	8.87702	8.73024	9.19229
BP_RS02435	bp0482	_	_	peptidase M14	_	4	A	0.436357	9.89926	9.99393	9.8686	9.83686	9.89046	9.83875	9.56501	9.61079	9.7161	9.52687	9.60502	9.64681	9.71488	9.66565	9.49509	9.62512	9.64424	9.74074	9.55598	9.62233	9.66466
BP_RS02440	bp0483	_	_	AraC family transcriptional regulator	AraC-family transcriptional regulator	12	_	0.798085	8.62986	8.55183	8.43307	8.45032	8.31351	8.34977	8.25728	8.30934	8.33	7.80372	8.17501	8.04391	8.80484	8.89767	8.77529	8.55117	8.50747	8.61238	8.83639	8.77506	9.00337
BP_RS02445	bp0484	_	lldD	alpha-hydroxy-acid oxidizing protein	L-lactate dehydrogenase (EC 1.1.2.3)	3	B	0.508529	10.9456	11.1019	11.1982	11.0087	11.059	10.9821	11.0482	10.9877	11.0539	11.134	11.0423	11.0206	11.4062	11.1278	11.3052	11.2031	11.1423	11.2578	11.3687	11.4165	11.0925
BP_RS02450	bp0485	_	_	acylphosphatase	_	2	B	0.493639	6.258	6.16113	6.28771	6.09678	6.74066	6.87773	6.55511	6.654	6.67706	6.62983	6.33673	6.2013	6.81819	7.18673	6.93441	7.09846	6.99086	7.18256	7.02268	7.16606	7.63976
BP_RS02455	bp0486	_	_	tripartite tricarboxylate transporter substrate binding protein	Putative exported protein	1	B	0.864216	8.49905	8.73848	8.77034	9.20791	9.46541	9.38937	9.43946	9.35863	9.46578	9.57262	9.42367	9.3736	9.43768	9.33335	9.46067	9.76389	9.75649	9.80574	10.0956	10.1267	10.7116
BP_RS02460	bp0487	_	_	amidase	Probable amidase	2	B	0.88747	8.07987	7.89087	7.94553	7.97418	8.09041	8.28282	8.15805	8.31094	8.23163	8.09187	8.22268	8.18841	8.10444	8.24083	8.00198	8.8685	8.76479	8.70947	9.08026	9.57561	10.0479
BP_RS02465	bp0488	_	_	helix-turn-helix domain-containing protein	Transcriptional regulator	3	B	0.758707	7.48955	7.60132	7.57605	7.2664	7.54999	7.70368	7.27625	7.43027	7.70332	7.53488	7.475	7.22729	8.26627	8.54478	8.14068	8.1073	8.28663	7.90021	7.96556	8.2121	8.54643
BP_RS02470	bp0489	gyrB	gyrB	DNA topoisomerase (ATP-hydrolyzing) subunit B	DNA gyrase subunit B (EC 5.6.2.2)	4	A	0.902576	13.4825	13.5185	13.4553	13.2853	13.2024	13.1468	12.9787	13.0383	13.06	13.2025	13.0732	13.0722	13.2898	13.1177	13.2173	12.5504	12.4448	12.6176	12.8052	12.7018	12.7967
BP_RS02475	bp0490	_	dnaN	DNA polymerase III subunit beta	Beta sliding clamp	4	A	0.838855	12.7382	12.6371	12.5972	12.5671	12.5553	12.4705	12.4177	12.3865	12.4441	12.5518	12.39	12.3902	12.7224	12.5497	12.614	11.8926	11.6917	11.9268	12.375	12.014	12.2665
BP_RS02480	bp0491	dnaA	dnaA	chromosomal replication initiator protein DnaA	Chromosomal replication initiator protein DnaA	4	A	0.932909	13.2417	13.2138	13.1841	12.6971	12.2423	12.1696	12.2636	12.2552	12.0824	11.9732	11.8546	11.9868	11.8495	11.7481	11.9162	11.2441	11.1684	11.5415	11.1234	10.8564	10.6062
BP_RS02485	bp0492	rpmH	rpmH	50S ribosomal protein L34	50S ribosomal protein L34	4	A	0.888213	12.3632	12.2367	12.2171	11.5268	11.7735	12.1201	11.6357	12.0284	12.0433	12.0569	12.2121	12.2137	11.3758	11.382	11.6868	10.8438	10.5723	10.752	10.834	10.4754	9.80405
BP_RS02490	bp0493	_	rnpA	ribonuclease P protein component	Ribonuclease P protein component (RNase P protein) (RNaseP protein) (EC 3.1.26.5) (Protein C5)	4	A	0.889207	11.3945	11.1788	11.1819	9.46921	9.22345	9.22175	9.11909	9.05822	8.99115	9.00981	9.03288	9.13132	8.12613	8.33975	8.32974	7.61516	7.76472	8.03984	7.67632	7.56588	6.75609
BP_RS02495	bp0494	yidD	_	membrane protein insertion efficiency factor YidD	Putative membrane protein insertion efficiency factor	7	A	0.878016	10.3571	10.0605	9.96336	8.48703	8.36109	8.20057	8.38122	8.27028	8.01253	7.97184	7.93957	7.95673	7.6343	7.48616	7.66665	6.94488	7.30426	7.52877	7.08362	7.09094	6.81216
BP_RS02500	bp0495	yidC	yidC	membrane protein insertase YidC	Membrane protein insertase YidC (Foldase YidC) (Membrane integrase YidC) (Membrane protein YidC)	4	A	0.733104	14.1612	14.1012	14.0074	13.9022	13.7211	13.7078	13.5315	13.6806	13.6735	13.8433	13.7605	13.7966	13.7764	13.6635	13.7307	13.3261	13.1945	13.4041	13.5188	13.1686	12.6776
BP_RS02505	bp0496	_	_	IS481-like element IS481 family transposase	_	_	_	0.0753039	6.77326	6.32666	6.42283	6.47022	6.55434	6.62307	6.35481	6.09383	6.24951	6.35756	6.56245	6.28813	6.98649	7.06125	7.0514	6.6284	6.62599	6.59837	6.73532	6.68673	6.89743
BP_RS02510	bp0497	_	_	NAD(P)H-dependent oxidoreductase	_	10	D	0.624145	7.17454	7.32995	7.27246	7.48385	7.38334	7.48055	7.09502	7.26485	7.11012	6.86794	6.76943	6.87878	7.41815	7.78374	7.78313	6.89322	6.78403	6.74252	6.60719	6.67208	6.05399
BP_RS02515	bp0498	_	_	LysR family transcriptional regulator	LysR-family transcriptional regulator	9	D	0.782096	10.39	10.5086	10.5546	10.6578	10.6235	10.5566	10.6551	10.6798	10.7105	10.8179	10.7958	10.7615	11.194	11.3039	11.3312	11.0181	11.1136	10.9584	10.9965	10.9729	10.4022
BP_RS02520	bp0499	_	_	hypothetical protein	Uncharacterized protein	7	A	0.632146	9.36768	9.47938	9.65911	9.49578	9.51238	9.38635	9.82218	9.77767	9.95424	9.72271	9.79218	9.8408	9.76007	9.38364	9.57163	9.41407	9.32567	9.49345	9.52119	9.25826	8.87541
BP_RS02525	bp0500	bopC	_	type III secretion system effector BopC	Uncharacterized protein	2	B	0.904104	10.8079	11.1773	11.1546	11.4368	11.7885	11.7065	11.8021	11.9789	11.9769	12.2538	12.128	12.0282	12.7569	12.5349	12.7111	12.3475	12.2908	12.3478	12.4989	12.5962	13.0288
BP_RS02530	bp0501	_	_	sensor histidine kinase N-terminal domain-containing protein	Sensor protein QseC (EC 2.7.13.3)	9	D	0.802784	7.00682	7.21728	7.13798	7.56237	7.6813	7.45027	7.5401	7.59067	7.56615	7.85524	7.76321	7.77037	8.43496	8.69657	8.36591	7.76366	7.9796	7.93432	7.77893	7.77073	7.53443
BP_RS02535	bp0502	_	_	site-specific integrase	Integrase	5	C	0.854671	11.4568	11.565	11.5798	11.8576	11.8221	11.7765	12.263	12.2017	12.1444	12.2539	12.1011	12.1169	11.8622	11.7176	11.7829	12.3995	12.2046	12.3409	12.7663	12.6548	12.2126
BP_RS02540	bp0503	_	_	helix-turn-helix domain-containing protein	HTH_17 domain-containing protein	1	B	0.822214	6.56643	7.2387	7.0239	7.71048	7.6484	7.69272	8.08974	7.96532	7.80279	7.98727	7.97435	8.11009	7.99336	8.01486	7.99369	8.395	8.35668	8.27051	8.61386	8.72803	9.11943
BP_RS02545	bp0505	_	_	hypothetical protein	Uncharacterized protein	1	B	0.865099	7.08067	7.36625	7.39871	8.22767	8.4699	8.34698	8.36222	8.34659	8.5333	8.85567	8.55095	8.58199	9.04266	8.84045	8.59027	8.93567	9.14348	9.01155	9.45351	9.35128	9.8922
BP_RS02550	bp0506	_	_	hypothetical protein	Uncharacterized protein	3	B	0.905341	9.70704	9.82859	9.80425	10.7278	10.9314	10.6902	10.855	11.0178	11.1481	11.2716	10.9864	11.0876	11.6132	11.3921	11.3575	11.6373	11.4758	11.5886	11.9185	12.053	12.5385
BP_RS02555	bp0507	_	_	hypothetical protein	Uncharacterized protein	2	B	0.880719	7.95203	7.85207	8.07552	8.91894	8.87655	8.645	8.78257	9.08015	9.15602	9.36765	9.16935	9.20492	9.87769	9.60642	9.63699	9.64428	9.76502	9.82648	10.1636	10.222	10.6506
BP_RS02560	bp0508	_	_	YqaJ viral recombinase family protein	Phage-related exonuclease	2	B	0.905311	7.64662	7.64763	7.62235	8.13865	8.15995	8.24619	8.33427	8.44926	8.49358	8.38788	8.41732	8.44362	8.63691	8.95016	8.82679	9.21091	9.11242	9.20151	9.52365	9.77645	10.476
BP_RS02565	bp0509	_	_	recombinase RecT	Phage-related DNA recombination protein	3	B	0.811402	8.1697	8.14243	8.19082	8.73423	8.53094	8.51855	8.51352	8.57595	8.59095	8.79744	8.63112	8.72355	8.86994	8.83524	8.79654	9.18895	8.98244	9.00053	9.12939	9.33631	9.76662
BP_RS02570	bp0510	_	_	hypothetical protein	Phage-related putative membrane protein	3	B	0.336177	4.82105	5.07888	4.95074	5.62359	5.12699	5.14801	5.31339	5.49992	5.45774	5.6947	5.05073	4.92603	5.64753	5.94662	5.90249	6.07104	5.812	6.14134	5.96735	6.12047	6.67347
BP_RS02575	bp0511	_	_	hypothetical protein	Uncharacterized protein	3	B	0.409088	6.01414	6.17487	6.10183	6.38013	6.02285	6.24071	6.0993	6.42319	6.26618	6.40981	6.24479	5.68741	5.97715	6.53106	6.63379	6.66583	6.71416	6.71947	6.73532	6.59952	7.36812
BP_RS02580	bp0512	_	_	hypothetical protein	_	3	B	0.713025	5.8793	6.01227	5.89107	6.94179	6.63826	6.67342	6.77531	6.49868	6.78522	6.52696	6.70396	6.58531	7.19025	7.40184	7.18275	7.4333	7.19357	7.34198	7.60362	7.61543	8.44838
BP_RS02585	bp0513	_	_	hypothetical protein	Uncharacterized protein	1	B	0.775917	8.66685	8.35285	8.4591	8.8309	8.85921	9.07854	8.72065	8.69085	8.78645	8.65877	8.72378	8.64013	9.19727	9.28398	9.33817	9.27275	8.87953	9.20907	9.45911	9.43171	10.3246
BP_RS02590	bp0514	_	_	IS481-like element IS481 family transposase	Transposase	_	_	0.123776	4.69012	4.75663	4.8718	5.05319	5.01117	4.98022	4.89706	4.95231	5.79294	5.32192	4.80857	5.12906	5.07689	5.5163	5.3934	5.57896	5.53292	5.6502	5.27608	5.6715	6.08979
BP_RS02600	bp0515	_	_	hypothetical protein	Uncharacterized protein	12	_	0.284251	5.03861	5.29069	5.20105	4.94926	5.28939	4.88716	5.39259	5.22616	5.04542	5.35578	4.5487	5.34011	5.30743	5.49779	5.85747	5.65537	5.36891	5.54923	5.3415	5.72884	5.50029
BP_RS02605	bp0516	_	_	hypothetical protein	Uncharacterized protein	12	_	0.932437	13.5784	13.5912	13.6831	12.9147	13.3091	13.2426	13.3769	13.1226	13.16	13.0074	12.7689	12.8846	14.3011	14.3157	14.4246	13.5455	13.8286	13.3721	13.4209	13.5658	13.2688
BP_RS02610	bp0517	_	_	IS481-like element IS481 family transposase	Transposase	_	_	0.117669	4.69012	4.75663	4.77994	4.67009	5.01117	4.98022	4.89706	4.95231	2.54632	2.35656	4.42597	5.12906	5.07689	4.90863	5.3934	5.57896	5.53292	5.6502	5.27608	5.6715	6.08979
BP_RS02615	bp0518	_	_	RidA family protein	Uncharacterized protein	7	A	0.7149	7.12379	7.27105	7.42096	6.98775	6.47003	6.62752	6.76543	6.6985	6.65419	6.44054	6.70396	6.59324	6.73019	6.75953	6.60729	6.38094	6.46537	6.21852	5.87771	5.54854	5.2433
BP_RS02620	bp0519	_	_	glutathione S-transferase	Probable glutathione S-transferase	3	B	0.822758	7.29488	7.20568	7.49126	8.11527	9.03046	8.91092	8.74649	8.56503	8.82978	8.52759	8.52316	8.37986	9.24783	9.26338	9.29844	9.52684	9.38031	9.21851	9.53213	10.146	10.778
BP_RS02625	bp0520	_	_	hypothetical protein	Putative exported protein	10	D	0.257911	6.89058	6.86569	6.80149	6.91722	6.445	6.80589	6.92745	6.654	6.94281	7.16524	7.01533	6.74924	7.12499	7.11485	7.18275	6.49614	6.55498	6.58993	6.836	6.58221	6.48642
BP_RS02630	bp0521	_	_	YegP family protein	UPF0339 protein BP0521	3	B	0.863268	7.96204	8.0485	7.95191	7.75211	7.41418	7.25798	7.81991	7.83741	7.70462	7.71375	7.76966	7.54181	8.48284	8.52502	8.27943	8.61184	8.38838	8.11569	8.75481	9.06907	9.71263
BP_RS02635	bp0522	_	_	DSD1 family PLP-dependent enzyme	Putative metal-activated pyridoxal enzyme	12	_	0.287072	8.09411	7.9238	7.74251	7.89521	7.8629	7.70971	7.76136	7.66738	7.5732	7.62349	7.50661	7.55083	7.85492	7.86461	7.81014	7.77194	7.96239	7.70238	7.97178	7.77661	8.05845
BP_RS02640	bp0523	_	_	HAD-IA family hydrolase	Probable haloacid dehalogenase	1	B	0.403625	6.35662	6.22694	6.0425	6.47022	6.68831	6.68309	6.65235	6.29748	6.53435	6.16598	6.43009	6.25436	6.73163	6.84401	6.60729	6.28788	6.91781	6.67883	6.94598	6.80826	7.74288
BP_RS02645	bp0524	_	_	LysR family transcriptional regulator	_	4	A	0.706278	10.5485	10.2879	10.2407	10.4682	10.1485	10.2435	9.96549	9.95831	9.78983	9.8394	9.79744	9.82673	9.66463	9.65901	9.62727	9.7885	9.7005	9.90298	9.85648	9.7011	9.52426
BP_RS02650	bp0525	_	_	DUF3596 domain-containing protein	Putative integrase (Remnant)	6	_	0.455391	8.11392	8.05593	7.90588	8.01466	7.58723	7.88623	7.51259	7.68765	7.61981	7.32033	7.53219	7.63819	7.69256	7.75904	7.89352	8.01047	7.91547	7.92397	8.17667	7.98342	8.14839
BP_RS02655	bp0527	_	ecnA1	entericidin A/B family lipoprotein	Entericidin A anti-toxin	2	B	0.628725	5.52132	5.80299	5.9284	5.99129	5.73799	5.66256	5.44945	5.74763	5.92521	5.48923	5.31592	5.81061	6.43276	5.94662	6.24679	6.64883	6.29397	6.02655	6.47499	6.58221	7.2377
BP_RS02660	bp0529	batB	_	autotransporter BatB	Autotransporter	4	A	0.95095	15.1312	14.9916	14.8356	13.6398	13.3797	13.4028	13.1517	13.1635	13.1175	13.0714	13.0478	13.116	12.5748	12.5262	12.5743	12.4639	12.4415	12.6889	12.1896	12.0336	11.671
BP_RS02665	bp0530	_	_	ureidoglycolate lyase	Uncharacterized protein	11	_	0.77422	10.0381	9.9793	9.79327	9.35705	9.32439	9.17493	9.29178	9.11894	9.16193	8.91748	8.95373	8.82208	9.30805	9.44733	9.31506	9.06539	9.03092	9.02644	8.73792	8.74038	8.70715
BP_RS02670	bp0531	_	_	tripartite tricarboxylate transporter substrate binding protein	Putative exported protein	5	C	0.721448	6.47917	6.54666	6.18949	5.66742	5.31447	5.26028	5.66788	5.77944	6.1728	5.86252	6.00711	6.15384	5.07617	6.17523	5.27351	6.65346	6.56044	6.25201	6.75224	6.81231	6.93737
BP_RS02675	bp0532	_	_	acyl--CoA ligase	Putative substrate-CoA ligase	_	_	0.229925	9.3697	9.35588	9.21947	9.15456	8.39971	8.51511	9.39221	8.73785	8.76743	8.75664	8.71379	8.88372	8.67209	9.46795	8.78819	9.15311	9.34015	9.03274	9.28881	8.98886	8.81933
BP_RS02680	bp0533	_	_	IclR family transcriptional regulator	Probable transcriptional regulator	2	B	0.365631	8.39613	8.60658	8.4969	8.34545	8.37379	8.14928	8.60229	8.35474	8.39476	8.7723	8.6922	8.9206	8.67533	8.42788	8.50785	8.88468	8.83422	8.86592	9.05322	8.77506	7.85693
BP_RS02685	bp0534	_	_	enoyl-CoA hydratase/isomerase family protein	Probable enoyl-CoA hydratase/isomerase	3	B	0.749463	10.6337	10.8029	10.8738	11.2062	11.271	11.0752	11.3699	11.3059	11.3355	11.6347	11.4408	11.5099	11.7715	11.7213	11.7844	11.7919	11.6081	11.7849	11.7125	11.7201	11.8339
BP_RS02690	bp0535	_	_	carboxymuconolactone decarboxylase family protein	Probable carboxymuconolactone decarboxylase	1	B	0.799471	10.1904	10.5046	10.559	10.9783	11.1029	11.1226	11.2008	11.1888	11.383	11.5962	11.4182	11.4228	12.0788	11.7438	11.8114	11.6717	11.5909	11.6699	11.7461	11.5576	11.7778
BP_RS02695	bp0536	_	_	tripartite tricarboxylate transporter substrate binding protein	_	5	C	0.887783	10.3479	10.5082	10.542	10.0316	10.0953	10.0098	10.2156	10.2025	10.097	10.467	10.292	10.2762	9.34211	9.07698	9.1583	10.2052	10.2073	10.3776	10.4991	10.3118	9.82834
BP_RS02700	bp0537	_	_	IS481-like element IS481 family transposase	_	_	_	0.00391413	2.03108	2.53184	1.73718	2.20899	1.55566	2.93243	2.11191	1.54469	2.30827	2.54341	2.29172	2.35882	2.17284	1.81758	2.39893	2.6713	2.58213	2.16941	1.8127	2.15993	1.27969
BP_RS02705	bp0538	rocF	_	arginase	Arginase (EC 3.5.3.1)	2	B	0.677064	7.33759	7.53727	7.27642	7.56237	7.36514	7.47661	7.23303	7.34679	7.19733	6.93848	7.14193	7.08637	6.88228	7.21419	7.2798	7.67359	8.06578	7.69631	7.62459	7.91005	7.98689
BP_RS02710	bp0539	_	rocD	ornithine--oxo-acid transaminase	Ornithine aminotransferase (OAT) (EC 2.6.1.13) (Ornithine--oxo-acid aminotransferase)	5	C	0.543211	8.11143	8.15636	7.98997	8.09237	7.78839	7.7288	7.74472	7.72598	7.92175	7.60993	7.79016	7.76229	7.13055	7.59147	7.56529	8.19936	7.96239	7.91892	8.01653	7.86505	8.25258
BP_RS02720	bp0541	_	_	GntR family transcriptional regulator	Probable transcriptional regulator	4	A	0.772057	9.57321	9.64318	9.70286	9.13526	8.81239	8.69775	9.15552	8.90494	8.93926	8.92929	8.94434	8.90935	8.52318	8.37948	8.57544	8.57507	8.43123	8.43626	8.17746	8.38377	7.54509
BP_RS02725	bp0542	_	_	tripartite tricarboxylate transporter substrate binding protein	Putative exported protein	_	_	0.00959447	6.28766	6.2417	6.37018	5.88206	5.83922	5.9444	5.89966	5.88072	6.00661	5.93624	5.82078	6.17996	6.08051	5.68644	5.26567	6.00602	5.77802	5.9919	5.95691	5.65126	5.43769
BP_RS02730	bp0543	_	_	FAD-binding oxidoreductase	DAO domain-containing protein	7	A	0.396428	5.75295	5.81627	6.02836	6.06777	5.90514	5.65065	6.35492	6.26486	6.45689	6.61036	6.39337	6.21693	5.86508	5.80927	5.58542	5.72547	6.49406	5.97949	5.75563	5.63124	5.67173
BP_RS02735	bp0544	_	_	4-oxalocrotonate tautomerase	Putative 4-oxalocrotonate tautomerase	_	_	0.10778	3.77827	2.96956	3.08432	3.84974	3.80289	3.85705	3.34331	3.40424	3.03526	3.65296	3.80163	4.43613	3.29951	3.71535	4.35254	4.55502	4.16821	4.63003	3.76181	4.1226	4.59818
BP_RS02740	bp0545	rimO	rimO	30S ribosomal protein S12 methylthiotransferase RimO	Ribosomal protein S12 methylthiotransferase RimO (S12 MTTase) (S12 methylthiotransferase) (EC 2.8.4.4) (Ribosomal protein S12 (aspartate-C(3))-methylthiotransferase) (Ribosome maturation factor RimO)	4	A	0.777252	11.8379	11.9372	11.911	11.8424	11.4435	11.4112	11.4567	11.5024	11.5201	11.8118	11.6691	11.7794	11.7681	11.5396	11.7666	11.1272	10.8824	11.1567	10.9663	10.5854	9.49074
BP_RS02745	bp0546	_	_	bacterioferritin	Bacterioferritin	12	_	0.921831	8.45211	8.46869	8.34966	7.98328	8.25388	8.30463	8.4043	8.14271	8.35797	8.02445	7.89674	7.82666	9.57381	9.52095	9.24665	9.25126	9.20606	9.00271	9.38347	9.68122	10.3563
BP_RS02750	bp0547	_	_	TIGR00730 family Rossman fold protein	Cytokinin riboside 5'-monophosphate phosphoribohydrolase (EC 3.2.2.n1)	7	A	0.529409	10.1389	10.121	10.1117	10.0815	10.1424	10.0016	10.1039	10.2524	10.1438	10.1386	10.1733	10.1329	9.66671	9.94316	9.84286	9.86803	9.78845	9.98016	10.0923	10.0037	9.65713
BP_RS02755	bp0548	_	_	hypothetical protein	Uncharacterized protein	_	_	0.140437	9.15988	9.31922	9.3864	9.16141	9.34519	9.27392	9.31832	9.27911	9.53088	9.22242	9.26263	9.19754	9.12657	9.02549	9.04078	9.35589	9.03676	9.26232	9.18363	9.35018	9.20714
BP_RS02760	bp0549	_	_	HAD hydrolase-like protein	Probable haloacid dehalogenase-like hydrolase	4	A	0.816257	10.0543	9.8806	9.7738	9.45564	8.95759	8.94172	9.16196	9.12167	9.03933	8.93891	8.70369	8.98898	8.47974	8.67093	8.56406	8.37958	8.18863	8.59506	8.34043	7.98846	8.19621
BP_RS02765	bp0550	_	_	pyridoxamine 5'-phosphate oxidase family protein	Putative_PNPOx domain-containing protein	10	D	0.63561	9.20527	8.9672	8.88014	9.00486	8.93305	9.27945	9.05849	8.98098	8.9926	9.12469	9.15364	9.02011	9.55449	9.41248	9.54366	8.99362	8.8823	8.99835	9.06063	8.84477	8.90815
BP_RS02770	bp0551	_	fmt	methionyl-tRNA formyltransferase	Methionyl-tRNA formyltransferase (EC 2.1.2.9)	4	A	0.845517	9.75655	9.69788	9.78101	9.78236	9.66239	9.60165	9.59673	9.68743	9.63414	9.56271	9.68317	9.64681	9.74328	9.55005	9.81051	9.17785	9.05459	9.15138	9.18836	9.01063	8.89628
BP_RS02775	bp0552	_	def2	peptide deformylase	Peptide deformylase 2 (PDF 2) (EC 3.5.1.88) (Polypeptide deformylase 2)	10	D	0.831892	10.7755	10.7237	10.8888	10.7026	10.7911	11.1158	10.8761	10.9774	10.9017	10.6195	10.6677	10.8713	11.3552	11.1534	11.4357	10.7111	10.6241	10.7661	10.6916	10.5173	10.4856
BP_RS02780	bp0553	kynU	kynU	kynureninase	Kynureninase (EC 3.7.1.3) (L-kynurenine hydrolase)	1	B	0.637072	8.5201	8.50998	8.70109	9.15608	9.31607	9.39214	9.25328	9.12848	9.21235	8.78919	8.89164	9.04869	9.32905	9.64863	9.4233	9.42514	9.64586	9.34474	9.1201	9.36354	9.39154
BP_RS02785	bp0554	_	lrp	Lrp/AsnC family transcriptional regulator	Leucine-responsive regulatory protein	3	B	0.477134	7.10389	6.89489	7.1791	6.94596	7.63227	7.56066	7.18848	7.40712	7.11398	7.53096	7.5868	6.96446	7.18469	7.86686	7.73695	7.76366	8.14625	7.8254	7.91273	8.13989	7.71416
BP_RS02790	bp0555	dprA	smf	DNA-protecting protein DprA	DprA_WH domain-containing protein	_	_	0.230278	8.81723	8.62667	8.7357	8.78548	8.66329	8.72612	8.63482	8.53408	8.64795	8.45994	8.50132	8.68369	7.96663	8.58772	8.41366	8.63954	8.83678	8.74891	8.52315	8.73255	8.5982
BP_RS02795	bp0556	_	hmgcL	hydroxymethylglutaryl-CoA lyase	Hydroxymethylglutaryl-CoA lyase (EC 4.1.3.4)	9	D	0.692608	9.40185	9.35135	9.32925	10.0558	10.0287	9.99485	9.80947	9.9391	10.0042	9.96506	10.043	9.94963	10.4857	10.5855	10.4822	10.3329	10.2552	10.2597	10.4664	10.2986	9.70657
BP_RS02800	bp0557	_	_	membrane protein	Putative membrane protein	9	D	0.748641	8.37567	8.45224	8.55103	8.60258	8.19437	8.25032	8.57219	8.65626	8.55555	8.505	8.58794	8.67708	9.26392	9.11032	9.21076	8.89147	8.76809	8.79986	8.70437	8.54563	8.30633
BP_RS02805	bp0558	_	_	amino acid ABC transporter substrate-binding protein	Amino acid-binding periplasmic protein	1	B	0.959167	9.99447	10.1724	10.2532	10.6902	10.6838	10.6295	10.9044	11.0162	11.0002	11.3121	11.172	11.1504	11.9137	11.6359	11.7974	11.5684	11.4581	11.505	11.6167	11.4831	11.7401
BP_RS02810	bp0559	_	_	PLP-dependent aminotransferase family protein	Probable aminotransferase	1	B	0.795606	9.39888	9.44701	9.65634	10.1383	10.1363	10.0253	9.76742	9.76458	9.85515	10.0278	10.1271	9.92471	10.4366	10.3343	10.4105	10.4358	10.3859	10.3275	10.1153	10.015	9.6833
BP_RS02815	bp0560	_	_	YggS family pyridoxal phosphate-dependent enzyme	_	_	_	0.103695	10.9338	10.8971	11.0349	11.7084	11.9604	11.9323	11.7303	11.8517	11.8281	11.8623	11.8097	11.6868	11.8041	11.9018	11.8175	11.7272	11.7561	11.6551	11.5719	11.7442	11.8531
BP_RS02820	bp0561	_	_	tripartite tricarboxylate transporter substrate binding protein	Putative exported protein	5	C	0.906412	10.0304	10.2054	10.2027	10.4854	10.7744	10.7584	10.5379	10.8348	10.7444	10.856	10.7682	10.7327	10.1989	10.093	10.0777	10.9583	11.029	11.0187	11.1646	11.385	11.8446
BP_RS02825	bp0562	_	_	copper chaperone PCu(A)C	Putative exported protein	3	B	0.919446	9.79394	9.84876	9.74401	10.2755	10.4533	10.41	10.3241	10.3968	10.5139	10.611	10.6259	10.6272	10.886	10.5171	10.6486	10.9853	10.6918	10.788	11.3495	11.386	11.6064
BP_RS02830	bp0563	_	_	LysR family transcriptional regulator ArgP	Probable LysR-family transcriptional regulator	_	_	0.0268889	7.3363	7.10496	7.3513	7.35577	7.42368	7.50023	7.2653	6.84355	7.18778	7.39586	7.15222	7.27769	7.01867	6.87079	7.27653	7.58894	7.28829	7.63647	6.93279	7.11479	7.42618
BP_RS02835	bp0564	_	_	LysE family transporter	Probable transporter	3	B	0.742214	7.35414	7.05864	7.10766	6.82529	6.68416	7.21339	6.77171	6.69117	6.64915	6.47382	6.48134	6.59324	7.29067	7.52861	7.42372	7.86298	7.66121	8.22276	7.99328	7.94035	7.97127
BP_RS02840	bp0565	_	_	IS481-like element IS481 family transposase	_	_	_	0.0197966	1.29894	0	0	0.749507	0	0	0	0	1.14746	0.525307	1.65875	0	0	0	1.25567	1.48027	0	1.43149	2.59119	0	0
BP_RS02845	bp0566	_	_	VOC family protein	Putative dioxygenase	9	D	0.615719	7.74301	7.97335	8.10598	8.38263	8.59618	8.70794	8.61162	8.59037	8.69794	9.00684	8.81709	8.7681	9.01951	8.99625	8.7826	8.75691	8.92105	8.76695	8.46484	8.61239	8.54123
BP_RS02850	bp0567	_	nadX1	aspartate dehydrogenase	L-aspartate dehydrogenase 1 (EC 1.4.1.21)	9	D	0.274417	5.87965	6.15637	5.84695	6.32231	6.52978	6.44514	6.35492	6.50586	6.61138	6.07722	6.3588	6.23689	6.69064	7.0476	6.6371	6.86363	6.63935	6.5634	6.20807	6.10031	6.05923
BP_RS02855	bp0568	_	_	LysE family translocator	Putative amino acid efflux protein	_	_	0.0170739	7.06353	7.07148	7.24584	7.5516	7.67594	7.65077	7.82453	7.45521	7.51052	7.27861	7.57897	7.53489	7.5102	7.13017	7.50817	7.6515	7.44384	7.76513	7.36465	7.58339	7.35348
BP_RS02860	bp0569	rsmB	_	16S rRNA (cytosine(967)-C(5))-methyltransferase RsmB	SAM_MT_RSMB_NOP domain-containing protein	7	A	0.577924	8.7933	8.65355	8.88884	8.90824	9.21402	9.19208	8.94915	9.05875	9.24509	8.91167	9.27479	8.86055	8.7532	8.64482	8.72394	8.88673	8.83265	8.74375	8.62308	8.73255	8.68694
BP_RS02865	bp0570	_	_	DUF4390 domain-containing protein	Putative exported protein	13	_	0.659836	8.78189	8.77806	8.86319	9.03765	9.56136	9.64301	9.37792	9.37526	9.3404	8.86965	8.71021	8.88946	9.43524	9.70006	9.73422	9.44381	9.44987	9.51504	8.89347	9.12124	9.53519
BP_RS02870	bp0571	plrS	_	HAMP domain-containing protein	Histidine kinase (EC 2.7.13.3)	11	_	0.728584	11.2837	11.3621	11.45	11.7813	11.3827	11.3784	11.3791	11.2048	11.2583	11.0921	11.1642	11.2851	11.8394	11.4654	11.4943	11.3367	11.3716	11.5878	11.0833	10.9611	10.9503
BP_RS02875	bp0572	plrR	_	response regulator	Putative two-component response regulator	10	D	0.82733	13.3667	13.2297	13.3077	13.1949	13.093	13.0132	13.297	13.1339	13.097	12.9019	12.7997	12.8988	13.4067	13.2487	13.3283	13.0489	12.9799	12.9606	12.9655	12.9164	13.0003
BP_RS02880	bp0573	trkA	trkA	Trk system potassium transporter TrkA	Trk system potassium uptake protein TrkA	7	A	0.908205	12.8225	12.7785	12.8019	12.7196	12.4469	12.4612	12.3626	12.2537	12.3223	12.2013	12.2535	12.3017	12.2366	12.143	12.272	12.0046	11.897	12.0605	11.7994	11.7234	11.6156
BP_RS02885	bp0574	_	trkH	potassium transporter Trk	Trk system potassium uptake protein	7	A	0.615833	10.9252	10.7731	10.7491	10.4321	10.2149	10.3069	10.0571	10.0813	10.0905	9.90749	9.90199	9.86659	10.3108	10.2814	10.1602	10.0163	10.0252	10.0465	9.85256	9.98715	10.156
BP_RS02890	bp0575	_	_	MarR family transcriptional regulator	Probable MarR-family transcriptional regulator	2	B	0.495265	8.66742	8.72779	8.80231	8.53372	9.39168	9.32283	9.32619	9.18212	9.22768	8.92755	8.82707	8.80286	9.33876	9.2869	9.37207	9.31899	9.37923	9.47829	9.22375	9.42351	9.97481
BP_RS02895	bp0576	_	_	XdhC family protein	Uncharacterized protein	3	B	0.716168	7.6015	7.65286	7.38213	8.11319	8.42517	8.6169	8.35191	8.24598	8.31411	7.97552	8.13232	8.22074	8.53837	8.66577	8.42894	8.774	8.72792	8.64944	8.63757	8.94353	9.20979
BP_RS02900	bp0577	_	_	nucleotidyltransferase family protein	NTP_transf_3 domain-containing protein	3	B	0.705535	5.6908	5.76648	5.99967	6.51324	6.99178	7.07763	7.18104	6.7852	6.65075	6.53064	6.78311	6.71179	7.35892	7.26761	7.63991	7.50029	7.72185	7.41553	7.42528	7.90207	7.97127
BP_RS02905	bp0578	_	_	amidohydrolase	Amidohydro-rel domain-containing protein	1	B	0.778381	6.08747	5.69196	5.87159	6.24668	6.21642	6.4275	6.25386	6.07422	6.31697	6.13731	5.99017	6.16482	6.66668	6.5991	6.47649	7.18973	7.17978	6.94771	7.07594	7.24146	7.13256
BP_RS02910	bp0579	_	maiA	maleate isomerase	Maleate isomerase (EC 5.2.1.1) (Maleate cis-trans isomerase)	3	B	0.920972	8.16103	8.41193	8.42173	8.62261	8.81239	8.72566	9.01125	8.83108	8.71037	9.09097	8.76294	9.00213	8.89096	9.04295	9.08646	9.6667	9.62469	9.64503	10.0335	10.2403	10.4551
BP_RS02915	bp0580	_	_	alpha/beta hydrolase	_	2	B	0.725845	6.41042	6.11909	7.10766	6.33289	6.89305	6.53105	6.62152	7.68092	7.2357	7.49532	7.84988	7.50048	6.95135	6.91269	6.93528	8.66134	8.52136	8.43293	9.03861	8.99433	9.51302
BP_RS02920	bp0581	_	_	hypothetical protein	Uncharacterized protein	3	B	0.948136	8.68832	8.71142	8.93882	9.66471	9.5302	9.53616	9.95111	9.86553	9.86735	10.1141	9.94944	9.96429	10.0712	10.0416	10.0722	10.6852	10.5542	10.6889	11.1231	11.1749	11.7986
BP_RS02925	bp0582	_	_	isochorismatase family protein	Putative isochorismatase	2	B	0.45047	5.4923	6.43686	6.46721	6.78304	5.78442	5.97528	6.02337	6.38282	6.20292	6.80596	6.72295	6.51284	6.2891	6.39366	7.01862	6.82868	7.60837	7.5692	7.24788	7.12677	8.21207
BP_RS02930	bp0583	_	_	nuclear transport factor 2 family protein	Probable ring hydroxylating beta subunit	_	_	0.154631	5.66449	5.64954	6.04508	6.51324	6.54259	6.09273	6.81131	6.4575	6.46768	6.69852	6.39337	6.28867	6.15344	6.97824	6.09868	6.87468	7.1259	6.92712	6.70352	6.84509	6.36437
BP_RS02935	bp0584	_	_	aromatic ring-hydroxylating dioxygenase subunit alpha	Probable Ring hydroxylating alpha subunit	5	C	0.760454	7.25522	7.27105	7.18682	7.70406	8.0328	7.89118	8.03552	7.84632	8.07446	7.96577	7.86282	8.1244	7.38455	7.4558	7.06853	8.0826	8.1667	8.19256	8.39722	8.35087	8.79325
BP_RS02940	bp0585	_	_	FAD-dependent oxidoreductase	Putative ferredoxin reductase	5	C	0.400676	5.30991	5.48321	5.79779	6.0509	6.18276	6.49074	6.381	6.24176	6.42015	6.52219	6.37695	6.46755	6.14534	5.87185	5.45092	6.34029	6.4229	6.43815	6.65616	6.57971	7.0156
BP_RS02945	bp0586	_	_	non-heme iron oxygenase ferredoxin subunit	Ferredoxin	3	B	0.708346	3.61408	3.55186	3.74922	4.03562	4.35027	4.74481	4.67834	4.95231	4.99431	5.70161	5.27631	5.02943	5.026	5.29916	4.97871	5.99209	6.27433	5.97949	6.33379	7.27416	6.25025
BP_RS02950	bp0589	_	_	TRAP transporter substrate-binding protein	Putative exported protein	2	B	0.707395	7.53225	7.38186	7.24036	7.58813	7.54664	7.55426	7.84018	7.49068	7.48077	7.6504	7.75264	7.54556	7.45356	7.90367	7.42574	8.08845	8.12073	8.13419	8.24762	8.39763	8.90919
BP_RS02955	bp0590	_	_	xanthine dehydrogenase family protein	Oxidoreductase, large chain	6	_	0.886105	8.18469	8.38181	8.41346	8.42003	8.3894	8.47842	8.58991	8.53766	8.54442	8.54452	8.40427	8.38419	8.14508	7.95238	7.91208	8.85298	8.82692	8.77577	8.76183	8.97726	9.13034
BP_RS02960	bp0591	_	_	FAD binding domain-containing protein	Oxidoreductase, medium chain	5	C	0.55674	6.86994	6.85912	6.62485	6.65316	6.67268	6.87838	6.75143	6.5278	6.60535	6.63303	6.88812	6.4979	6.51449	6.95819	6.44365	7.10785	7.50294	7.2088	7.08552	7.3579	7.21693
BP_RS02965	bp0592	_	_	2Fe-2S iron-sulfur cluster binding domain-containing protein	Putative iron-sulfur binding protein	5	C	0.750554	7.45699	7.42851	7.70168	7.69094	7.42368	7.43059	7.65439	7.68417	7.55063	7.71429	7.4217	7.5635	7.23262	6.95672	7.10614	7.96985	7.81679	7.84495	7.87472	7.91595	8.08325
BP_RS02970	bp0593	_	_	ABC transporter substrate-binding protein	Putative exported protein	5	C	0.622467	6.99722	7.0326	7.13985	6.78129	6.65597	6.79177	7.3038	6.55266	6.74394	6.54464	6.62073	6.80956	6.26736	5.98964	6.42046	6.93923	7.04488	6.86353	7.10808	7.21696	7.52174
BP_RS02975	bp0594	_	_	ABC transporter ATP-binding protein	Probable ABC transporter, ATP-binding component	5	C	0.346801	6.68868	6.76767	6.78587	6.95769	6.51881	6.62864	6.58352	6.57041	6.53489	6.54427	6.57724	6.86692	5.79592	5.75549	5.68779	6.77261	7.29454	6.69109	6.35562	6.58221	5.99616
BP_RS02980	bp0595	_	_	ABC transporter permease	ABC transporter, permease component	_	_	0.11365	6.93038	6.55349	6.42918	6.47374	5.84604	6.1708	6.12142	6.3993	6.09792	5.42047	5.54635	6.40882	5.60698	5.48777	5.8218	5.74191	6.56649	5.93893	5.49112	6.07985	6.028
BP_RS02985	bp0596	_	_	TRAP transporter small permease subunit	Putative membrane protein	_	_	0.167255	7.82467	7.17172	7.73199	7.18026	6.01653	6.89793	7.79512	7.39073	6.58919	7.49264	7.29842	7.53489	4.11901	6.16384	5.95565	7.84425	6.38387	7.42269	7.57452	7.145	6.42095
BP_RS02990	bp0597	_	_	TRAP transporter large permease subunit	Putative membrane protein	_	_	0.149678	10.5224	10.2695	9.94666	9.91612	9.96496	9.79777	9.77022	9.5488	9.93114	9.66506	9.7204	9.81013	8.67675	9.11273	9.12393	9.3694	9.96094	9.76255	9.73799	10.0611	9.69437
BP_RS02995	bp0598	_	_	glutamate--cysteine ligase	Putative glutamate--cysteine ligase 2 (EC 6.3.2.2) (Gamma-glutamylcysteine synthetase 2) (GCS 2) (Gamma-GCS 2)	3	B	0.888986	11.4628	11.3448	11.3032	10.7546	11.0292	10.9944	11.0454	11.123	11.1439	10.9702	10.7687	10.8347	11.4704	11.4894	11.4122	11.8653	11.8777	11.8151	12.1915	12.4624	13.4594
BP_RS03000	bp0599	_	bioC	methyltransferase domain-containing protein	Malonyl-[acyl-carrier protein] O-methyltransferase (Malonyl-ACP O-methyltransferase) (EC 2.1.1.197) (Biotin synthesis protein BioC)	7	A	0.335224	9.41169	9.14465	9.19287	8.63964	8.77328	8.76223	8.58546	8.28822	8.256	8.30233	8.2536	8.37986	8.66433	8.80777	8.67599	8.12591	8.49054	8.34102	8.2169	8.49658	8.60519
BP_RS03005	bp0600	_	_	ComF family protein	Pribosyltran domain-containing protein	_	_	0.00598506	3.66998	3.65719	4.03782	3.31396	2.20407	3.29339	2.17471	3.32017	3.25421	2.20388	3.63611	2.225	3.5743	3.10008	2.97059	1.88167	3.5375	2.6433	2.45626	2.95621	1.27969
BP_RS03010	bp0601	_	trmL	tRNA (cytidine(34)-2'-O)-methyltransferase	tRNA (cytidine(34)-2'-O)-methyltransferase (EC 2.1.1.207) (tRNA (cytidine/uridine-2'-O-)-methyltransferase TrmL)	4	A	0.477787	7.39854	7.29898	7.40617	7.22462	7.14673	7.39541	7.44109	7.45521	7.27633	7.30213	7.50957	7.44831	7.52175	7.21929	7.47531	7.10111	6.86625	6.83121	6.89249	6.74658	6.14905
BP_RS03015	bp0602	_	_	tripartite tricarboxylate transporter substrate binding protein	_	10	D	0.89542	10.3357	10.459	10.4889	10.3368	10.2809	10.2773	10.0501	10.1879	10.2845	10.2467	10.213	10.2743	10.6875	10.7185	10.7933	10.0544	10.0208	10.041	9.97289	9.80104	9.55961
BP_RS03020	bp0603	_	gpsA	NAD(P)-dependent glycerol-3-phosphate dehydrogenase	Glycerol-3-phosphate dehydrogenase [NAD(P)+] (EC 1.1.1.94) (NAD(P)H-dependent glycerol-3-phosphate dehydrogenase)	4	A	0.909707	11.4053	11.2719	11.3605	11.1572	10.9839	11.0113	11.1761	11.0864	10.9884	10.9854	11.0765	11.0605	10.5345	10.5832	10.7404	10.372	10.198	10.6452	10.2254	10.1237	9.69069
BP_RS03025	bp0604	secB	secB	protein-export chaperone SecB	Protein-export protein SecB	9	D	0.750125	11.8941	12.1175	12.1023	12.4857	12.5265	12.4688	12.3186	12.5124	12.6725	12.9459	12.827	12.7835	13.1957	13.0219	13.0316	12.457	12.3407	12.5613	12.7631	12.6013	12.2917
BP_RS03030	bp0605	grxC	grxC	glutaredoxin 3	Glutaredoxin	9	D	0.633869	11.3973	11.4244	11.4356	11.9456	11.4787	11.4199	11.8391	11.6147	11.6642	12.0129	11.9629	12.0188	12.116	12.0772	12.1341	11.5874	11.4706	11.7129	11.8512	11.5563	11.2027
BP_RS03035	bp0606	_	_	rhodanese-like domain-containing protein	Rhodanese domain-containing protein	10	D	0.769665	10.6781	10.5942	10.6073	10.7582	10.427	10.4579	9.94487	10.0736	10.2049	10.4914	10.6773	10.6584	10.9497	10.9619	10.9113	10.2108	10.1872	10.2781	10.1771	9.53299	8.90112
BP_RS03040	bp0607	gpmA	gpmA, gpm	2%2C3-diphosphoglycerate-dependent phosphoglycerate mutase	2,3-bisphosphoglycerate-dependent phosphoglycerate mutase (BPG-dependent PGAM) (PGAM) (Phosphoglyceromutase) (dPGM) (EC 5.4.2.11)	9	D	0.752447	10.6216	10.7049	10.7187	10.6747	11.0528	11.0211	10.882	10.9206	10.9878	11.2096	11.1163	11.0231	11.3665	11.2221	11.312	10.8271	10.7411	10.8309	10.9847	10.9693	11.0326
BP_RS03045	bp0608	_	_	peptidoglycan DD-metalloendopeptidase family protein	Putative peptidase	11	_	0.905008	11.4155	11.3139	11.3835	11.3092	11.2253	11.2069	11.2512	11.1889	11.128	10.8916	10.8799	10.9613	11.2574	11.1463	11.1695	10.8825	10.8635	10.9148	10.6396	10.5825	10.3151
BP_RS03050	bp0609	cptA	ctpA	protease CptA	Putative carboxy-terminal processing protease	10	D	0.660282	13.3917	13.4043	13.3324	13.6734	13.5749	13.5144	13.3246	13.4962	13.4579	13.4915	13.4268	13.4305	13.7567	13.5766	13.6484	13.382	13.2301	13.428	13.5094	13.3211	13.1773
BP_RS03055	bp0610	moeB	thiF	molybdopterin-synthase adenylyltransferase MoeB	Adenylyltransferase (EC 2.7.7.-)	4	A	0.703858	10.8455	10.8221	10.8253	10.9405	10.7377	10.7672	10.8124	10.6368	10.7254	10.5019	10.6141	10.6032	10.8653	10.8705	10.8988	10.5293	10.4239	10.7182	10.5115	10.2942	10.0012
BP_RS03065	bp0612	_	_	tripartite tricarboxylate transporter substrate binding protein	Putative exported protein	2	B	0.986722	10.5256	10.4586	10.4763	10.9836	10.8642	10.8499	10.8844	10.936	10.9229	11.0975	10.9649	11.0015	10.7679	10.8334	10.7244	11.7785	11.7136	11.7375	12.4051	12.3785	12.5874
BP_RS03070	bp0613	_	_	IclR family transcriptional regulator	Probable transcriptional regulator	10	D	0.350926	7.38785	7.48105	7.42562	7.8677	7.62846	7.86043	7.23303	7.48187	7.48758	7.40556	7.7161	7.65389	7.86999	8.08093	7.7556	7.58247	7.78451	7.46395	7.43182	7.29598	7.21014
BP_RS03075	bp0614	_	_	FAD-dependent oxidoreductase	_	2	B	0.755919	5.5332	5.9814	6.07036	5.95013	6.04394	6.01994	5.92492	6.10995	6.02137	6.53127	5.98509	6.41831	5.89446	6.95672	6.04986	7.15273	7.11843	6.85255	7.09503	8.45866	7.54509
BP_RS03080	bp0615	_	_	tripartite tricarboxylate transporter substrate binding protein	Putative exported protein	3	B	0.524502	6.48627	6.43686	6.13052	5.92911	6.06499	6.43145	5.98914	6.168	6.10595	5.9349	6.09928	6.5638	6.12954	6.24178	6.29858	6.77209	6.86636	6.53374	6.73425	6.83879	7.54509
BP_RS03085	bp0616	_	_	amidohydrolase	Amidohydro-rel domain-containing protein	7	A	0.54542	7.17451	7.31771	7.25454	6.51324	6.64276	6.96114	6.52072	6.32707	6.54171	6.66291	6.73761	6.89	6.74743	6.65232	6.58324	6.6284	6.87931	6.82192	7.18721	7.42393	7.47619
BP_RS03090	bp0617	_	_	TetR family transcriptional regulator	TetR-family transcriptional regulator	7	A	0.515621	9.70116	9.83989	9.75145	9.65378	9.53641	9.33552	9.64502	9.70908	9.74982	9.78462	9.84192	9.81145	9.30524	9.17144	9.112	9.48929	9.50983	9.4472	9.59209	9.14281	8.06061
BP_RS03095	bp0618	lpdA	lpdA	dihydrolipoyl dehydrogenase	Dihydrolipoyl dehydrogenase (EC 1.8.1.4)	1	B	0.397293	7.30298	7.07148	7.16672	7.43753	7.6378	7.68338	7.60231	7.49805	7.69247	7.31808	7.53114	7.45792	7.51101	7.7149	7.44108	7.87543	8.08407	7.86742	7.79461	8.18363	7.61705
BP_RS03100	bp0619	_	_	ABC transporter ATP-binding protein	Branched-chain amino acid ABC transporter, ATP-binding protein	5	C	0.587227	5.04962	4.14467	4.23576	4.59463	4.94131	5.36239	5.68317	5.07022	4.79719	4.9895	5.15052	5.0107	4.51243	5.22516	4.77441	5.86493	6.10517	5.9367	5.9706	6.01339	6.17779
BP_RS03105	bp0620	_	_	branched-chain amino acid ABC transporter ATP-binding protein/permease	Branched-chain amino acid ABC transporter, permease protein	2	B	0.666215	5.3422	5.45652	4.73725	4.63475	4.86789	5.13821	5.66788	5.05604	5.37757	5.12622	5.5479	5.08444	4.78332	5.29916	4.77441	6.22241	6.23422	6.36111	6.27884	6.53533	6.73691
BP_RS03110	bp0621	_	_	branched-chain amino acid ABC transporter permease	Branched-chain amino acid ABC transporter, permease protein	5	C	0.715273	4.19251	3.81882	4.19795	3.72922	4.26992	4.02447	4.15167	3.80554	4.01808	3.44161	4.35169	3.69422	3.00328	3.90708	2.97059	4.92918	5.22502	5.16163	5.49112	4.95143	5.45405
BP_RS03115	bp0622	_	_	ABC transporter substrate-binding protein	Putative leu/ile/val-binding protein	3	B	0.904665	6.37106	6.48178	6.39998	6.18047	6.3267	6.38396	6.08947	6.51331	6.51997	6.64256	6.21057	6.57945	6.43478	7.04094	6.55431	7.94916	8.24453	7.60981	8.15465	8.31194	8.81058
BP_RS03120	bp0623	_	_	MmgE/PrpD family protein	_	5	C	0.970679	8.4632	8.32931	8.45493	8.77023	8.46401	8.78892	8.92848	8.5488	8.81174	8.89421	8.94235	8.96017	7.35892	7.90669	7.44108	10.0508	10.1842	9.94898	9.89876	10.1356	10.2915
BP_RS03125	bp0624	_	_	AMP-binding protein	Putative substrate-CoA ligase	5	C	0.986822	10.689	10.7626	11.1904	11.5327	11.4966	11.3189	11.626	11.6513	11.636	11.9318	11.7907	11.749	9.70926	9.69031	9.61159	13.1385	13.128	13.1594	13.1657	13.2186	13.9377
BP_RS03130	bp0625	_	_	acyl-CoA/acyl-ACP dehydrogenase	Probable acyl-CoA dehydrogenase	5	C	0.985504	9.67396	9.93607	10.4103	11.0021	10.9725	10.9976	11.0957	11.2403	11.3936	11.6572	11.3947	11.5073	9.55673	9.51734	9.52385	12.6626	12.5902	12.7357	12.5536	12.6568	13.0916
BP_RS03135	bp0626	_	_	2-oxo acid dehydrogenase subunit E2	_	5	C	0.993731	8.82964	9.16277	9.48335	10.2729	10.1653	10.1038	10.3434	10.4827	10.5723	10.7929	10.7386	10.7472	8.77925	8.67068	8.73129	11.8453	11.825	11.8671	11.7694	11.8456	11.7945
BP_RS03140	bp0627	_	_	enoyl-CoA hydratase/isomerase family protein	Probable enoyl-CoA hydratase/isomerase	5	C	0.978522	7.76745	8.35356	8.80586	9.39086	9.70924	9.6877	9.94811	10.0315	10.0676	10.3928	10.0927	10.1874	8.08322	8.13941	8.42177	11.5639	11.6182	11.5549	11.4054	11.6963	12.2494
BP_RS03145	bp0628	_	_	alpha-ketoacid dehydrogenase subunit beta	Putative pyruvate dehydrogenase E1 beta subunit	5	C	0.989917	8.46835	9.00415	9.31595	9.96727	10.3774	10.295	10.4893	10.72	10.7252	11.187	10.887	11.0078	9.07253	9.07941	9.01012	12.3288	12.2626	12.2645	12.1518	12.2944	12.4478
BP_RS03150	bp0629	_	pdhA	thiamine pyrophosphate-dependent dehydrogenase E1 component subunit alpha	Putative pyruvate dehydrogenase E1 component, alpha subunit	5	C	0.983381	7.63273	8.17358	8.43307	9.12121	9.42245	9.30944	9.88867	9.96851	9.95975	10.4048	10.2398	10.1117	8.47812	9.01207	8.51873	11.5594	11.6057	11.4676	11.5363	11.7268	11.6183
BP_RS03155	bp0630	_	_	IclR family transcriptional regulator	Probable transcriptional regulator	4	A	0.660758	9.3875	9.5569	9.50179	9.62045	9.39757	9.37661	9.30447	9.43939	9.38869	9.69199	9.6901	9.71775	9.33429	9.3014	9.24994	9.53529	9.3722	9.50002	9.36054	8.86196	8.6873
BP_RS03160	bp0632	_	_	CoA-binding protein	_	5	C	0.534562	7.20567	7.30894	6.96933	7.07868	7.28701	7.22471	7.09711	7.117	7.18377	6.85493	7.11973	6.91271	6.27391	6.76569	6.55431	7.37968	7.45053	7.2387	6.81312	7.01169	7.11845
BP_RS03165	bp0633	_	_	tripartite tricarboxylate transporter substrate binding protein	Putative exported protein	3	B	0.654223	6.51439	6.35851	6.33442	6.25149	5.9712	6.22663	6.53127	6.44101	6.50121	6.01444	6.00711	6.33932	6.70957	7.05114	6.63379	8.2068	8.33804	6.8417	7.7536	8.69805	6.90485
BP_RS03170	bp0634	_	_	acyl-CoA dehydrogenase family protein	Probable acyl-CoA dehydrogenase (EC 1.3.99.-)	5	C	0.634614	5.62039	5.80299	6.00029	6.39554	6.58504	6.42257	6.64555	6.50586	6.85337	6.93782	6.34041	6.74924	6.08051	6.5991	5.54834	7.08039	7.3095	6.66646	6.93279	7.22748	7.43545
BP_RS03175	bp0635	_	_	enoyl-CoA hydratase/isomerase family protein	Probable enoyl-CoA hydratase (EC 4.2.1.17)	5	C	0.804879	4.56473	5.24608	5.40022	5.79059	6.16898	5.65905	6.22524	5.86194	5.95148	6.26922	6.30292	6.17996	4.67603	4.94817	5.52457	6.6029	6.23422	6.52757	6.46784	6.81231	6.95183
BP_RS03180	bp0636	_	_	thiolase family protein	Thiolase_N domain-containing protein	5	C	0.587218	4.64516	4.86235	5.02912	4.92088	5.68096	4.70483	5.2307	5.52542	5.32981	5.25947	5.80959	5.8089	4.59617	3.76812	3.69683	5.20164	5.34472	5.44066	5.60723	5.6715	5.96344
BP_RS03185	bp0637	_	_	Zn-ribbon domain-containing OB-fold protein	Uncharacterized protein	5	C	0.350943	3.57432	3.73329	3.88869	4.11319	4.25088	4.29257	4.53987	4.79368	4.66577	5.17864	4.75405	4.30863	3.29951	3.87822	3.75382	4.50252	4.5817	4.77052	4.55088	5.1099	5.36137
BP_RS03190	bp0638	_	_	hypothetical protein	Uncharacterized protein	5	C	0.471055	4.66364	4.04402	4.23975	4.92088	4.91146	4.93457	5.6361	5.84709	5.45567	5.02544	5.38929	4.67024	4.01847	4.42869	4.46842	4.76862	5.33138	5.44066	5.8354	5.79042	5.96344
BP_RS03195	bp0639	_	_	MaoC family dehydratase	MaoC-like domain-containing protein	5	C	0.555438	4.93938	4.42619	5.0503	5.35257	5.31447	5.06711	5.80467	5.97198	5.98692	5.46765	5.56635	5.66856	4.75034	4.7324	5.3168	5.86296	5.48161	5.72287	6.29309	5.82025	6.19753
BP_RS03200	bp0640	_	_	acyl-CoA dehydrogenase family protein	Probable acyl-CoA dehydrogenase	5	C	0.786592	5.99051	6.0425	6.75932	7.16212	7.0537	6.82432	7.4463	7.36438	7.21092	7.41087	7.52655	7.17149	5.8658	6.32812	6.28906	7.22686	7.13617	7.24038	7.44622	7.36137	7.8654
BP_RS03205	bp0641	_	_	tripartite tricarboxylate transporter substrate binding protein	Putative exported protein	5	C	0.733544	4.91094	5.1033	5.48343	5.23977	5.59258	5.57481	5.78842	5.79165	5.7677	5.61863	5.72187	5.61993	4.06401	4.26852	4.53634	5.56268	5.6074	5.61774	6.03809	6.12047	6.46107
BP_RS03210	bp0642	_	_	CoA transferase	Uncharacterized protein	5	C	0.327792	6.07982	6.06106	6.38304	6.57307	6.71995	6.05169	6.88772	6.49442	6.54935	6.72595	6.57724	6.14622	5.49917	6.39782	6.04366	6.88564	6.85632	6.87359	6.45447	6.75785	6.83038
BP_RS03215	bp0643	_	_	LysR family transcriptional regulator	LysR-family transcriptional regulator	3	B	0.557568	7.20798	7.12629	7.03411	7.25799	7.47176	8.00867	7.53099	7.68417	7.70502	7.37307	7.39404	7.41202	7.43418	7.43269	7.51543	7.92805	8.19485	7.98732	7.69223	8.06043	8.60504
BP_RS03220	bp0644	_	_	dihydrodipicolinate synthase family protein	Putative dihydrodipicolinate synthase	_	_	0.203609	6.91293	6.48911	6.76785	6.74745	6.69894	7.03565	6.52072	7.01288	6.82336	6.81048	7.11973	6.65431	6.92457	6.89016	6.85233	7.04295	7.36123	6.99793	7.28122	7.16606	7.18766
BP_RS03235	bp0647	_	_	DUF126 domain-containing protein	DUF126 domain-containing protein	_	_	0.00304421	3.84482	4.3796	4.47309	4.82011	4.82974	4.78541	5.34507	4.64213	4.95195	5.32161	4.96366	4.0127	4.97325	5.0029	4.96937	5.2363	5.42294	4.81537	4.89535	5.37402	5.19758
BP_RS03250	bp0649	_	_	tripartite tricarboxylate transporter substrate binding protein	Putative exported protein	_	_	0.158972	5.25949	5.34816	5.41873	5.03148	5.28939	5.06495	4.13858	5.05604	5.48534	4.85744	5.18343	4.83609	5.01662	5.28071	5.8218	5.6244	5.55791	5.16928	5.20568	5.58028	5.82495
BP_RS03255	bp0650	_	_	LysR family transcriptional regulator	LysR-family transcriptional regulator	_	_	0.0166147	7.52127	7.65253	7.70964	7.50919	7.5999	7.25467	7.63844	7.31806	7.25765	7.23983	7.2152	7.42536	7.35393	7.51406	7.35201	7.39545	7.44783	7.31562	7.26484	7.40956	7.54399
BP_RS03260	bp0651	dld	dld	D-lactate dehydrogenase	Quinone-dependent D-lactate dehydrogenase (EC 1.1.5.12) (D-lactate dehydrogenase) (D-LDH)	7	A	0.45492	8.6358	8.53503	8.61621	8.73116	8.37901	8.30786	8.35191	8.38643	8.32835	8.49679	8.33778	8.35105	8.38028	8.2319	8.14323	8.29004	8.35684	8.28489	8.06021	7.89841	7.8484
BP_RS03265	bp0652	_	_	acyl-CoA dehydrogenase family protein	Probable acyl-CoA dehydrogenase	5	C	0.860836	7.06125	6.97364	6.84485	7.46936	7.32456	7.28268	6.95447	7.38176	7.24446	7.29879	7.32214	7.25186	6.43478	6.65232	6.80765	7.91331	7.82316	7.72351	7.99191	8.06897	8.79541
BP_RS03270	bp0653	_	_	acyl-CoA dehydrogenase family protein	Probable acyl-CoA dehydrogenase	5	C	0.851223	8.07186	8.09784	8.13472	8.55722	8.41331	8.21731	8.20605	8.0479	8.24682	8.21603	7.90481	8.25657	7.23574	7.81398	7.37487	8.93567	8.88447	8.87783	8.81215	9.22874	9.4759
BP_RS03275	bp0654	_	_	tripartite tricarboxylate transporter substrate binding protein	Putative exported protein	5	C	0.917181	7.18931	7.10149	7.01009	7.2065	7.49272	7.20383	7.04592	7.5394	7.29633	7.4354	7.55992	7.31315	6.39316	6.31423	6.22019	7.77729	7.80397	7.6591	7.93522	7.99436	8.37897
BP_RS03280	bp0655	argE	_	acetylornithine deacetylase	Acetylornithine deacetylase (EC 3.5.1.16) (N-acetylornithinase)	7	A	0.425851	7.10635	7.18166	6.99559	6.83586	6.77127	6.59409	6.60104	6.16969	6.32314	6.40438	6.57724	6.56552	6.00369	6.04154	5.60849	6.48551	6.66905	6.86311	6.59049	6.52901	6.00741
BP_RS03285	bp0656	_	_	DUF1028 domain-containing protein	Uncharacterized protein	5	C	0.425685	5.18131	5.53279	5.31821	5.4864	5.48036	5.72123	5.35178	4.905	5.13691	4.72132	5.24852	4.68801	4.00031	4.07629	4.13277	5.4128	5.34472	4.88822	4.91512	5.20342	6.05662
BP_RS03290	bp0657	_	_	RidA family protein	Putative endoribonuclease	5	C	0.671975	6.07507	5.94932	5.75221	6.29754	6.27083	6.44334	6.29514	5.6952	5.90593	5.78812	5.72187	6.00888	5.42993	5.26528	5.8218	6.50824	6.10517	6.43815	6.70542	6.76204	7.18766
BP_RS03295	bp0658	_	_	NAD(P)-binding domain-containing protein	Uncharacterized protein	5	C	0.846346	8.12626	8.08527	8.09423	8.79368	8.45579	8.48218	8.12248	7.95806	8.08639	8.15561	8.02177	8.02607	7.32395	7.18673	7.127	8.02835	7.75816	8.00216	8.19968	8.25864	8.94503
BP_RS03300	bp0659	_	_	oxidoreductase	Probable zinc-binding dehydrogenase	5	C	0.847262	8.18134	8.18348	8.27176	9.51425	9.82425	9.55511	9.22249	9.40106	9.58379	9.53548	9.4623	9.45128	9.14383	8.93337	9.09513	9.62113	9.60208	9.54321	10.0581	10.3375	11.0079
BP_RS03305	bp0660	_	_	LysR family transcriptional regulator	LysR-family transcriptional regulator	5	C	0.680792	9.23558	9.23598	9.24573	9.7906	9.75195	9.63035	9.98516	9.82683	9.78791	9.77223	9.76645	9.66001	9.59177	9.47524	9.34198	10.1116	10.032	9.8509	10.136	10.0597	9.60142
BP_RS03310	bp0661	_	_	acetate--CoA ligase family protein	Putative acetyl-CoA synthetase (EC 6.2.1.13)	5	C	0.961759	9.61061	9.86314	9.88565	10.5794	10.3492	10.3476	10.1703	10.1751	10.2321	10.1851	10.1939	10.2177	9.06152	9.04975	8.98692	10.2398	10.1922	10.2588	10.5337	10.7544	11.0541
BP_RS03315	bp0662	_	_	enoyl-CoA hydratase/isomerase family protein	Probable enoyl-CoA hydratase	5	C	0.895856	8.56686	8.67218	8.79385	9.53979	9.75767	9.46769	9.12437	9.09238	9.34638	9.14017	8.98867	9.03788	8.54741	8.39757	8.42154	9.37983	9.33112	9.34097	9.98903	10.1837	11.1433
BP_RS03320	bp0663	_	_	ABC transporter substrate-binding protein	NMT1 domain-containing protein	5	C	0.896934	13.1555	13.0459	12.9861	13.161	13	12.9557	13.2097	13.0651	13.0518	12.8616	12.7714	12.9035	11.8274	12.207	12.1627	13.1778	13.0068	13.333	13.032	13.0827	13.5714
BP_RS03325	bp0664	_	_	tripartite tricarboxylate transporter substrate binding protein	Putative exported protein	5	C	0.889813	13.623	13.4745	13.4219	13.6818	13.7061	13.6464	13.5759	13.6649	13.708	13.9027	13.8115	13.7493	13.0527	12.9378	13.0381	13.8323	13.6765	13.7682	14.1267	14.1473	14.8298
BP_RS03330	bp0665	_	_	NAD(P)-dependent oxidoreductase	Thymidine diphosphoglucose 4,6-dehydratase	5	C	0.945441	12.2099	12.1647	12.1129	12.1869	12.1636	12.1687	12.1617	12.2142	12.2175	12.1308	12.1811	12.1421	11.359	11.0563	11.1636	11.9453	11.9303	12.1131	12.187	12.2021	12.5063
BP_RS03335	bp0666	glmS	glmS	glutamine--fructose-6-phosphate transaminase (isomerizing)	Glutamine--fructose-6-phosphate aminotransferase [isomerizing] (EC 2.6.1.16) (D-fructose-6-phosphate amidotransferase) (GFAT) (Glucosamine-6-phosphate synthase) (Hexosephosphate aminotransferase) (L-glutamine--D-fructose-6-phosphate amidotransferase)	9	D	0.756141	12.2452	12.2804	12.3245	12.226	12.4294	12.3998	12.2168	12.3462	12.4768	12.5938	12.4432	12.5246	12.928	12.7796	12.8741	12.6562	12.4699	12.6553	12.8623	12.7503	12.5622
BP_RS03340	bp0667	_	_	Lrp/AsnC family transcriptional regulator	AsnC-family transcriptional regulator	_	_	0.219885	9.06296	8.86747	8.9648	9.02926	9.59445	9.57095	9.30794	9.35863	9.53022	9.30391	9.35254	9.33361	9.37171	9.38278	9.59085	9.37712	9.30951	9.32494	9.0966	9.2076	9.11395
BP_RS03345	bp0668	_	_	acetyl-CoA C-acyltransferase	Probable thiolase	5	C	0.306752	7.24309	7.32752	7.44004	7.40509	7.63227	7.38856	7.51144	7.39037	7.48564	7.24094	7.4574	7.26483	7.3846	7.54503	7.32728	7.52008	7.5446	7.78479	7.62157	7.75097	8.33851
BP_RS03350	bp0669	_	_	enoyl-CoA hydratase/isomerase family protein	3-hydroxyacyl-CoA dehydrogenase (EC 1.1.1.35)	2	B	0.686174	7.91461	7.97577	8.01834	7.95187	8.09797	7.70518	7.75398	7.87457	7.7558	7.77926	7.94806	7.51332	8.08368	7.97351	7.79145	8.3679	8.41255	8.00722	8.46933	8.42804	8.51781
BP_RS03355	bp0670	_	_	DNA alkylation response protein	Probable acyl-CoA dehydrogenase	5	C	0.883628	6.7823	6.94986	6.65193	6.63509	6.54125	6.08104	6.56579	6.47899	6.44264	6.40416	6.71338	6.12739	4.95452	5.80927	5.49547	7.51322	7.1403	7.10464	7.60809	7.60068	8.09174
BP_RS03360	bp0671	_	_	tripartite tricarboxylate transporter substrate binding protein	Putative exported protein	5	C	0.909684	6.50228	6.02747	6.16576	5.95013	6.21642	6.09724	6.0568	6.4156	6.5633	6.58516	6.66986	6.2613	5.14569	5.51747	4.58978	7.38717	7.30426	7.44436	7.77996	7.8388	8.49132
BP_RS03365	bp0672	_	_	acetate--CoA ligase family protein	Acetyl-CoA synthetase	5	C	0.836553	7.28419	7.29012	7.19008	7.09342	6.88692	6.96068	7.09502	7.01644	7.19776	6.88359	6.95007	6.77076	5.83657	6.32812	6.49027	7.52988	7.63324	7.47025	7.82396	7.678	8.00235
BP_RS03370	bp0673	_	_	citryl-CoA lyase	Citrate synthase (unknown stereospecificity) (EC 2.3.3.16)	5	C	0.697021	5.34629	5.50508	5.42656	5.31576	5.10999	5.21583	5.49894	5.13386	5.54913	5.30078	5.80773	5.02943	3.66642	5.02508	3.88609	5.67997	5.54319	5.80992	6.20704	6.0591	6.51999
BP_RS03375	bp0674	_	_	helix-turn-helix domain-containing protein	Probable transcriptional regulator	3	B	0.831189	7.58045	7.76779	7.81408	7.91977	8.07704	8.09635	8.01095	7.97283	8.01284	7.87353	7.66968	7.60797	8.31944	8.51031	8.13597	8.85738	9.04645	8.39173	8.66834	8.95556	9.49601
BP_RS03380	bp0675	_	_	molybdopterin-dependent oxidoreductase	Probable molybdopterin oxidoreductase	3	B	0.825967	8.71442	8.80628	8.73848	8.83497	8.79197	8.70684	8.82298	8.74666	8.77941	8.75785	8.69943	8.70336	9.11927	9.23188	8.9228	9.13715	9.42579	9.28711	9.20164	9.46423	9.85527
BP_RS03395	bp0677	_	hemA	glutamyl-tRNA reductase	Glutamyl-tRNA reductase (GluTR) (EC 1.2.1.70)	4	A	0.899899	12.2594	12.3172	12.351	11.992	11.7554	11.7605	11.9583	11.7894	11.7301	11.5626	11.553	11.5418	11.826	11.7405	11.8147	11.067	10.9894	11.1093	10.9362	10.717	10.1354
BP_RS03400	bp0678	prfA	prfA	peptide chain release factor 1	Peptide chain release factor 1 (RF-1)	4	A	0.922742	10.7827	10.8458	10.9827	10.651	10.2771	10.1764	10.2663	10.2441	10.2088	10.5314	10.3821	10.4031	9.95211	9.81238	9.88793	9.52156	9.30494	9.46741	9.25322	9.05322	8.45707
BP_RS03405	bp0679	prmC	prmC, hemK	peptide chain release factor N(5)-glutamine methyltransferase	Release factor glutamine methyltransferase (RF MTase) (EC 2.1.1.297) (N5-glutamine methyltransferase PrmC) (Protein-(glutamine-N5) MTase PrmC) (Protein-glutamine N-methyltransferase PrmC)	4	A	0.917131	9.76324	9.70835	9.64375	9.22526	9.12361	8.97837	8.86446	8.87298	8.83256	8.75834	8.8095	8.91499	7.98639	7.97874	7.95434	7.70138	7.57203	7.78551	7.42528	7.57466	6.73691
BP_RS03410	bp0680	grxD	_	Grx4 family monothiol glutaredoxin	Glutaredoxin	_	_	0.213536	9.84464	9.85297	9.83775	9.81899	10.1966	10.2695	10.008	10.1449	10.0579	10.0418	9.79919	9.97548	10.232	10.1139	10.3504	10.0471	9.98896	9.94954	9.91899	9.94968	10.2405
BP_RS03415	bp0681	_	ubiX	UbiX family flavin prenyltransferase	Flavin prenyltransferase UbiX (EC 2.5.1.129)	4	A	0.861117	9.87151	9.74487	9.70689	9.88958	9.72232	9.82291	9.80004	9.5903	9.71024	9.43709	9.50148	9.54874	9.06522	9.43633	9.32956	8.77989	8.76348	8.983	8.98075	8.80147	8.46048
BP_RS03420	bp0682	_	_	tripartite tricarboxylate transporter substrate binding protein	Putative exported protein	5	C	0.974764	6.92385	6.96539	6.95884	8.25749	8.92745	8.8906	9.46872	9.51587	9.40581	9.72941	9.63077	9.54859	8.68087	8.3294	8.63531	10.8645	10.7837	10.6777	11.248	11.3497	11.4382
BP_RS03425	bp0683	_	_	ABC transporter substrate-binding protein	4,5-dihydroxyphthalate decarboxylase (EC 4.1.1.55)	2	B	0.959834	7.03931	6.98929	7.52212	9.60744	10.1153	9.92321	10.6864	10.6385	10.6785	11.2024	10.9129	10.8309	10.3326	10.1029	10.1509	11.6389	11.487	11.4669	11.781	11.8044	12.3065
BP_RS03435	bp0685	_	_	xanthine dehydrogenase family protein molybdopterin-binding subunit	Probable dehydrogenase/oxidase	5	C	0.976948	7.63982	7.64763	8.06938	9.5825	9.64412	9.44302	10.3408	10.3997	10.3474	10.3814	10.2467	10.2193	9.19669	8.97767	8.97116	10.5028	10.4364	10.4887	10.329	10.4725	10.3964
BP_RS03455	bp0689	_	rlpA	septal ring lytic transglycosylase RlpA family protein	Endolytic peptidoglycan transglycosylase RlpA (EC 4.2.2.-)	12	_	0.677464	10.6709	10.4721	10.5892	10.8843	10.7558	10.854	10.7019	10.5789	10.5608	10.5389	10.5016	10.5175	10.8478	10.8136	10.8725	10.8084	10.7563	10.7993	10.7607	10.8218	11.0138
BP_RS03460	bp0690	rapZ	_	RNase adapter RapZ	Nucleotide-binding protein BP0690	2	B	0.583458	12.1118	11.9769	12.0297	12.1016	12.2206	12.2289	12.4622	12.2622	12.1303	11.8959	11.8141	11.9095	12.0715	12.4984	12.3149	12.2261	12.2947	12.3559	12.0068	12.261	12.5422
BP_RS03465	bp0691	_	_	c-type cytochrome	_	4	A	0.538422	11.2505	11.0865	11.0557	10.627	10.4389	10.6123	10.748	10.4929	10.3264	10.0702	10.3503	10.3939	10.6021	10.5633	10.525	10.0237	10.1801	9.96715	9.77192	9.89236	9.07819
BP_RS03470	bp0692	_	_	cytochrome c	Cytochrome C	4	A	0.807544	9.41137	9.09359	9.09123	8.40469	8.2817	8.62941	8.43729	8.27475	8.37921	8.18176	8.29383	8.23572	8.80856	9.16996	8.78893	7.98522	8.06807	8.16173	7.88557	7.89691	7.5287
BP_RS03475	bp0693	_	hprK	HPr kinase/phosphorylase	HPr kinase/phosphorylase (HPrK/P) (EC 2.7.11.-) (EC 2.7.4.-) (HPr(Ser) kinase/phosphorylase)	4	A	0.928229	11.288	11.195	11.0494	11.4072	11.2533	11.2319	11.2079	11.294	11.1652	11.1447	11.1478	11.2215	11.3105	11.254	11.2374	10.7156	10.6468	10.7406	10.7791	10.6143	10.7681
BP_RS03480	bp0694	_	rpoP	PTS sugar transporter subunit IIA	Nitrogen regulatory IIA protein (EC 2.7.1.69)	7	A	0.796514	11.0563	10.9323	10.9535	11.1833	10.7306	10.7092	11.0207	10.6705	10.6295	10.6398	10.6649	10.7513	10.6211	10.8285	10.8168	10.3183	10.1565	10.448	10.3619	10.0869	10.1506
BP_RS03485	bp0696	raiA	_	ribosome-associated translation inhibitor RaiA	_	3	B	0.818834	11.2948	11.3274	11.0643	11.7974	12.1183	12.4831	12.0546	11.7226	11.7078	11.258	11.0536	11.1827	11.772	12.4097	12.1561	12.3801	12.3597	12.3688	12.5576	13.0461	14.083
BP_RS03490	bp0697	lptB	_	LPS export ABC transporter ATP-binding protein	Lipopolysaccharide export system ATP-binding protein LptB	7	A	0.836163	11.0661	11.0414	10.9062	10.8706	10.6626	10.5606	10.6016	10.5009	10.5237	10.4414	10.4113	10.5157	10.5383	10.5037	10.5277	10.0785	9.88418	10.2682	10.1546	9.92143	10.1181
BP_RS03495	bp0698	lptA	lptA	lipopolysaccharide transport periplasmic protein LptA	Lipopolysaccharide export system protein LptA	7	A	0.686673	11.7933	11.8578	11.8088	11.7046	11.3856	11.4487	11.2864	11.3075	11.339	11.381	11.3588	11.4402	11.3713	11.4049	11.434	11.166	10.9827	11.2376	11.2336	11.0936	11.169
BP_RS03500	bp0699	lptC	_	LPS export ABC transporter periplasmic protein LptC	Putative exported protein	10	D	0.78101	12.3197	12.1953	12.0815	11.8871	11.7116	11.7459	11.8299	11.6865	11.5992	11.4398	11.4171	11.6308	11.8351	11.8873	11.9026	11.3218	11.229	11.421	11.3858	11.2186	11.6255
BP_RS03505	bp0700	_	_	HAD-IIIA family hydrolase	3-deoxy-D-manno-octulosonate 8-phosphate phosphatase KdsC (EC 3.1.3.45) (KDO 8-P phosphatase)	7	A	0.740355	10.6177	10.5075	10.5647	10.1146	10.2586	10.2596	10.0253	10.0595	10.0931	10.09	10.0641	10.1067	10.3069	10.2577	10.4184	9.81167	9.86388	9.9276	9.85462	9.88524	10.1058
BP_RS03510	bp0701	_	_	KpsF/GutQ family sugar-phosphate isomerase	Uncharacterized protein	4	A	0.832262	11.3868	11.3528	11.3717	10.8244	10.7492	10.7938	10.9427	10.7933	10.7584	10.6525	10.6141	10.7242	10.4488	10.6247	10.6618	10.1262	10.2587	10.4408	10.1477	10.1625	10.4324
BP_RS03515	bp0702	purT	purT	formate-dependent phosphoribosylglycinamide formyltransferase	Formate-dependent phosphoribosylglycinamide formyltransferase (EC 6.3.1.21) (5'-phosphoribosylglycinamide transformylase 2) (Formate-dependent GAR transformylase) (GAR transformylase 2) (GART 2) (Non-folate glycinamide ribonucleotide transformylase) (Phosphoribosylglycinamide formyltransferase 2)	_	_	0.047535	9.65203	9.96674	10.1092	10.4188	10.5811	10.5842	10.5136	10.6473	10.7217	10.6883	10.6807	10.5968	10.6459	10.5082	10.5236	10.7073	10.524	10.6995	10.7443	10.6113	10.2259
BP_RS03520	bp0703	_	_	TonB-dependent receptor	_	1	B	0.556026	9.20034	9.16576	9.29969	9.18813	9.0003	9.17781	9.26865	9.34678	9.31145	9.44076	9.449	9.426	9.77599	9.86524	9.83395	9.44848	9.42579	9.52447	9.705	9.42969	8.87495
BP_RS03525	bp0704	_	_	IS481-like element IS481 family transposase	Transposase	_	_	0.00703252	3.98394	3.65719	4.38708	3.04388	3.40881	3.56222	4.38668	4.03028	4.48381	3.6169	4.19057	3.74292	4.36858	3.90708	4.44736	3.7553	4.16821	4.02461	4.00701	4.20045	3.53044
BP_RS03530	bp0705	_	_	GMC family oxidoreductase N-terminal domain-containing protein	_	10	D	0.545482	7.56917	7.63652	7.52491	7.35577	7.41418	7.4553	7.6925	7.16891	7.47795	7.22421	7.28416	7.17321	7.7031	8.06272	7.9661	7.58729	7.63979	7.43689	7.32268	7.39308	7.33481
BP_RS03535	bp0706	_	_	putative Na+/H+ antiporter	Putative membrane protein	4	A	0.775849	10.2311	10.2591	10.3125	9.94251	9.60333	9.78034	9.64702	9.74792	9.86436	9.913	9.81387	9.96005	9.37774	9.10051	9.1583	9.27769	9.15193	9.23892	9.3407	9.05459	8.22942
BP_RS03540	bp0707	_	_	FmdB family transcriptional regulator	CxxC_CXXC_SSSS domain-containing protein	10	D	0.758685	9.05014	8.83686	8.95579	8.62592	8.50283	8.46252	8.2776	8.44713	8.71392	8.81831	8.79511	8.76069	9.77587	9.61808	9.68083	8.80135	8.74815	8.68672	9.16856	8.64775	8.04027
BP_RS03545	bp0708	_	_	DUF502 domain-containing protein	Putative membrane protein	7	A	0.814756	11.0037	10.8907	10.8587	10.0484	9.93719	9.86736	10.0099	10.0915	9.89614	9.85716	9.74913	9.77783	10.2289	10.2888	10.4638	9.68558	9.47745	9.82279	9.57945	9.39994	8.83444
BP_RS03550	bp0709	aspS	aspS	aspartate--tRNA ligase	Aspartate--tRNA(Asp/Asn) ligase (EC 6.1.1.23) (Aspartyl-tRNA synthetase) (AspRS) (Non-discriminating aspartyl-tRNA synthetase) (ND-AspRS)	10	D	0.917239	13.1397	13.2438	13.0904	12.8848	12.9896	12.9729	12.8444	12.9894	13.095	13.2117	13.0509	13.1358	14.1169	13.835	13.8462	12.7829	12.713	12.9324	13.0454	12.7727	12.6522
BP_RS03555	bp0710	_	_	endonuclease/exonuclease/phosphatase family protein	Putative endonuclease/exonuclease/phosphatase family protein	9	D	0.633059	9.36783	9.57013	9.43909	9.64347	9.77605	9.63659	9.88022	9.69664	9.66091	9.58501	9.58789	9.63615	9.96297	9.96656	9.97236	9.76791	9.69357	9.77041	9.91961	9.6991	9.72503
BP_RS03560	bp0711	clsB	clsB	cardiolipin synthase ClsB	Cardiolipin synthase B (CL synthase) (EC 2.7.8.-)	9	D	0.422821	8.97302	8.95509	9.03741	9.32722	9.09801	8.94362	9.19391	8.97271	9.05967	9.21862	9.17251	9.13856	9.33429	9.33127	9.27924	8.99508	8.99378	9.01629	9.13152	9.14281	8.84098
BP_RS03565	bp0712	_	_	DMT family transporter	Putative membrane protein	10	D	0.592389	6.98115	7.10149	7.13985	6.86282	6.46411	6.72428	6.68884	6.76625	6.49627	6.22574	6.97366	6.74924	7.4439	7.6381	7.35201	6.85052	7.18644	6.65398	6.35562	6.32549	5.89585
BP_RS03570	bp0713	_	_	MFS transporter	_	12	_	0.554836	8.89473	8.68425	8.71263	8.75253	8.71227	8.96363	9.01663	8.56791	8.65682	8.48861	8.56434	8.58818	9.36527	9.58729	9.2232	9.04423	9.30709	8.62414	8.69814	8.94658	7.72859
BP_RS03575	bp0715	_	_	carbon monoxide dehydrogenase	_	2	B	0.610044	8.23768	7.98018	8.1778	8.04039	8.55585	8.56931	8.63079	8.70749	8.72548	7.86951	8.01213	7.99804	8.22781	8.31231	8.36679	8.55023	8.70749	8.66201	8.28443	8.81635	9.25952
BP_RS03580	bp0716	_	_	IS481-like element IS481 family transposase	_	2	B	0.355372	3.18882	2.35044	3.01253	3.55261	3.54452	2.92984	3.52918	3.85019	3.28637	3.86628	3.75194	3.588	2.6906	3.87822	3.59845	4.50252	3.71521	4.39967	4.10249	4.44756	5.01858
BP_RS03585	bp0718	_	_	oxaloacetate decarboxylase	Carboxyvinyl-carboxyphosphonate phosphorylmutase (EC 2.7.8.23)	1	B	0.836738	9.29591	9.18066	9.21514	9.56054	9.58875	9.52257	9.66846	9.79124	9.58653	9.82922	9.64833	9.70114	9.52122	9.78724	9.86556	10.0951	10.0451	10.0102	10.2144	10.4556	10.7387
BP_RS03590	bp0720	_	_	DUF1059 domain-containing protein	Uncharacterized protein	12	_	0.326874	5.61273	5.37599	5.34607	5.53275	5.81556	6.62399	5.97952	5.63987	5.49318	5.46115	4.13995	5.43753	6.76305	6.50046	6.84296	6.34962	5.72167	5.67999	5.87771	6.68306	7.07526
BP_RS03595	bp0721	_	_	aminotransferase class III-fold pyridoxal phosphate-dependent enzyme	Probable aminotransferase	1	B	0.906251	8.63273	8.37158	8.99442	9.57066	9.97592	9.80196	10.1039	10.2665	10.2282	10.528	10.3459	10.2066	10.7642	10.6593	10.4847	10.7634	10.7642	10.7096	11.139	11.193	11.7628
BP_RS03600	bp0722	_	_	amidase family protein	Probable amidase	8	_	0.926997	7.42045	7.37062	7.76974	8.59108	8.80465	8.74603	9.49639	9.52233	9.58554	9.48439	9.50148	9.5863	8.93857	9.11032	9.08784	9.61194	9.67168	9.74217	9.95291	10.0611	10.4842
BP_RS03605	bp0723	_	_	ABC transporter ATP-binding protein	Probable ABC transporter, ATP-binding protein	1	B	0.935155	7.42028	7.68643	7.94928	8.62923	8.69381	8.4993	9.62055	9.5885	9.557	9.78283	9.53752	9.60755	9.40555	9.34565	9.34595	9.69345	9.57214	9.76545	9.90553	9.95917	9.97882
BP_RS03610	bp0724	_	_	ABC transporter permease	Probable ABC transporter, permease protein	3	B	0.894052	6.48135	6.17487	6.76995	7.02836	7.01878	6.7377	8.08931	7.86049	8.0423	7.97184	7.7952	8.1363	8.02501	8.13695	7.82787	8.08845	8.10769	8.2708	8.38563	8.29627	8.74124
BP_RS03615	bp0725	_	_	ABC transporter permease	Probable ABC transporter, permease protein	1	B	0.938522	5.58116	5.58939	6.11118	7.06786	7.18494	7.12845	7.74309	7.9969	7.85994	8.32752	8.02177	8.32968	8.08972	8.16778	8.23382	8.61424	8.4691	8.60158	8.79209	8.87082	9.19711
BP_RS03620	bp0726	_	_	ABC transporter substrate-binding protein	Probable ABC transporter, periplasmic binding protein	1	B	0.92603	8.15911	8.46124	8.71798	9.48681	10.2121	10.0553	10.6904	10.7222	10.6941	10.7993	10.6266	10.5818	11.3916	11.3661	11.316	11.4242	11.4524	11.2297	11.5647	11.8677	12.4252
BP_RS03625	bp0727	_	_	IclR family transcriptional regulator	Probable transcriptional regulator	1	B	0.821885	8.23082	8.48803	8.55446	8.93715	9.53937	9.39856	9.79272	9.70885	9.82405	9.81116	9.67403	9.65015	9.99243	10.0171	9.8427	10.1965	9.94974	9.98621	10.1572	10.1994	10.526
BP_RS03630	bp0728	_	_	TetR/AcrR family transcriptional regulator	Probable transcriptional regulator	6	_	0.644472	6.70483	6.70661	6.83436	7.28453	7.10252	7.25277	7.42448	7.37525	7.26073	7.49027	7.24812	7.27769	7.88852	7.59829	7.55617	7.66044	7.63796	7.67794	7.77744	7.69155	7.90361
BP_RS03640	bp0731	nspC	nspC	carboxynorspermidine decarboxylase	Carboxynorspermidine/carboxyspermidine decarboxylase (CANS DC/CAS DC) (CANSDC/CASDC) (EC 4.1.1.96)	10	D	0.730009	10.5052	10.5048	10.5137	10.095	9.67868	9.69587	10.0832	10.1903	10.1415	10.5254	10.3199	10.3402	10.859	10.8173	10.9803	10.1313	9.97046	10.3463	10.3898	10.0532	9.33754
BP_RS03645	bp0732	_	_	saccharopine dehydrogenase family protein	Putative exported protein	9	D	0.956703	10.7739	10.7865	10.8245	10.7905	11.1669	11.0242	11.4396	11.5433	11.5885	11.6834	11.5435	11.6353	12.5333	12.512	12.6137	11.5067	11.42	11.6267	11.9731	11.8841	12.2563
BP_RS03655	bp0735	_	_	polyisoprenoid-binding protein	Putative exported protein	2	B	0.734185	7.53244	7.68664	7.75262	8.09533	8.45514	8.28866	8.19669	8.45504	8.21809	8.32393	8.38044	8.37399	8.29707	8.35392	8.37438	8.65823	8.56646	8.67363	8.75327	8.88658	9.29446
BP_RS03660	bp0736	_	bfrF	TonB-dependent siderophore receptor	Putative ferric siderophore receptor	3	B	0.740202	7.60042	7.6064	7.59851	7.78235	7.52292	7.54142	7.81241	7.55575	7.79395	7.78065	7.75589	7.72383	8.33269	9.08427	8.4331	8.12964	8.62845	8.19963	8.46017	8.52362	7.98717
BP_RS03665	bp0737	_	_	FecR family protein	Putative inner membrane sensor for iron transport	8	_	0.426867	6.29289	6.57238	6.39076	7.29133	7.37291	7.54148	7.96692	7.88882	7.71904	7.5644	7.4217	7.42536	7.67563	7.83441	7.6876	7.51022	7.54729	7.43845	7.68089	7.83248	7.78491
BP_RS03670	bp0738	_	_	sigma-70 family RNA polymerase sigma factor	_	1	B	0.529753	4.62295	4.76678	4.38708	5.10349	5.04487	5.0759	5.2307	5.37729	5.27108	5.56071	5.18343	5.1239	5.92967	5.78505	5.40449	5.86296	6.0732	5.78725	5.90821	6.03805	5.28532
BP_RS03675	bp0739	_	_	IS481-like element IS481 family transposase	_	_	_	0.0351304	0.465151	0	0.655808	0	0	1.03381	0	0.942552	0	0	0	0	0	0	0.940371	0.922199	0	1.34864	1.17408	1.02927	0
BP_RS03680	bp0740	_	_	DUF1156 domain-containing protein	Putative DNA methylase	4	A	0.90403	10.549	10.3994	10.4189	10.1208	9.9976	10.0358	10.0769	9.97691	9.97687	9.61149	9.77596	9.85167	9.89122	10.1166	9.85588	9.36751	9.40872	9.41104	9.11009	8.98716	8.8745
BP_RS03685	bp0741	_	_	helix-turn-helix domain-containing protein	Putative transcriptional regulator	10	D	0.850458	7.32419	7.34969	7.09129	7.35008	7.38501	7.1441	7.20159	6.96385	7.18067	6.77654	7.00947	6.9323	7.93939	8.61137	8.46721	7.56186	7.56091	7.51928	7.04736	7.13435	6.67777
BP_RS03690	bp0742	_	_	IS481 family transposase	_	_	_	0.0675865	7.13143	7.41904	7.12384	7.30946	7.00316	7.33442	7.26198	7.2585	7.26435	7.08868	6.91322	7.21842	7.19911	7.40902	7.3397	7.27557	7.34249	7.37922	7.22174	7.32706	7.5287
BP_RS03695	bp0744	_	_	helix-turn-helix transcriptional regulator	Putative transcriptional regulator	2	B	0.512992	10.3942	10.4289	10.475	10.7324	10.5417	10.3869	10.8495	10.7894	10.7334	10.6073	10.4257	10.5428	10.8236	10.7032	10.7829	10.7369	10.616	10.7235	10.8277	10.9352	10.7278
BP_RS03700	bp0745	_	_	response regulator transcription factor	Putative transcriptional regulator	_	_	0.0982125	6.9262	6.82965	6.7802	6.41358	6.54125	6.14954	6.39345	6.51331	6.41567	6.60739	6.41176	6.28695	6.34825	6.84401	6.82172	6.6284	6.2675	6.13121	6.11771	6.20647	6.05662
BP_RS03705	bp0746	_	proB	glutamate 5-kinase	Glutamate 5-kinase (EC 2.7.2.11) (Gamma-glutamyl kinase) (GK)	7	A	0.52108	10.349	10.1809	10.1735	9.49757	9.47519	9.5945	9.26605	9.4159	9.5114	9.34333	9.42195	9.36951	9.37171	9.21201	9.36619	9.16441	9.11034	9.22913	9.04844	9.01494	9.19038
BP_RS03710	bp0747	obgE	obg	GTPase ObgE	GTPase Obg (EC 3.6.5.-) (GTP-binding protein Obg)	4	A	0.913017	12.8666	12.7186	12.6722	11.7134	11.6264	11.556	11.719	11.716	11.5597	11.5054	11.5131	11.5254	11.1924	11.2913	11.3102	11.3508	11.1967	11.3959	11.0783	11.0186	10.9084
BP_RS03715	bp0748	rpmA	rpmA	50S ribosomal protein L27	50S ribosomal protein L27	7	A	0.808749	11.4264	11.5494	11.5003	10.733	10.5333	10.4861	10.6281	10.7474	10.6751	11.025	10.8713	10.7708	10.467	9.92513	9.89933	9.73192	9.42914	9.61106	10.0604	9.48713	8.84098
BP_RS03720	bp0749	rplU	rplU	50S ribosomal protein L21	50S ribosomal protein L21	4	A	0.843131	14.6397	14.4628	14.2957	13.9252	13.2705	13.4134	13.8255	13.6063	13.682	13.8497	13.83	13.8977	12.7864	12.563	12.5638	12.3958	11.9385	12.4362	12.821	12.0288	11.2432
BP_RS03725	bp0750	_	_	fumarylacetoacetate hydrolase family protein	Uncharacterized protein	4	A	0.64631	8.21483	8.23674	8.24929	7.8618	7.84985	8.08324	8.28304	8.08281	8.26575	7.89819	7.91966	7.7516	7.97709	8.13941	8.04352	7.48023	7.80635	7.61497	7.53686	7.44993	7.29194
BP_RS03730	bp0751	ispB	ispB	octaprenyl diphosphate synthase	Octaprenyl-diphosphate synthase (EC 2.5.1.-)	10	D	0.839651	10.1655	10.2685	10.2438	9.89371	9.84814	9.73498	9.99382	10.0582	9.87968	9.87159	9.86907	9.82482	10.2691	10.1963	10.217	9.41725	9.43087	9.62146	9.62355	9.34873	8.85683
BP_RS03740	bp0752	_	_	LysR family transcriptional regulator	LysR-family transcriptional regulator	4	A	0.811325	11.7169	11.6455	11.665	11.4233	11.3015	11.2856	11.4734	11.3641	11.327	11.2408	11.1753	11.2283	11.3567	11.3259	11.3375	11.1519	11.1252	11.0591	10.9885	10.8685	10.4819
BP_RS03745	bp0753	_	hyuA	hydantoinase/oxoprolinase family protein	Putative hydantoin utilization protein A	11	_	0.25553	8.01318	7.956	7.89174	7.45063	7.39157	7.37614	6.88772	7.26716	7.38573	7.24015	7.32214	7.31341	7.14327	7.38924	7.58614	7.49901	7.49646	7.58452	7.56106	7.71826	7.82252
BP_RS03750	bp0754	_	hyuB	hydantoinase B/oxoprolinase family protein	Hydantoin utilization protein B	2	B	0.527704	8.5099	8.40229	8.29166	8.21903	8.28875	8.23964	8.01713	8.11675	8.15254	8.08445	7.93957	8.02116	8.15331	8.50306	8.06315	8.54773	8.30949	8.46542	8.44265	8.28539	8.84527
BP_RS03755	bp0755	_	_	FAD-binding oxidoreductase	Putative amino acid deaminase	_	_	0.132923	7.65175	7.47369	7.44047	7.22462	7.2415	6.85515	7.08874	7.13761	7.08858	6.93668	6.96244	7.10244	7.39888	7.28498	7.14578	7.15247	7.31785	7.38656	7.26952	7.25394	7.07916
BP_RS19570	bp0756	_	_	tripartite tricarboxylate transporter substrate binding protein	_	_	_	0.0874954	6.81306	7.15831	7.0325	7.17122	6.78122	6.73052	6.83251	6.99213	7.14594	7.00331	6.79479	7.09253	6.66668	6.85569	6.53284	6.9141	7.17653	7.23416	6.97031	6.83292	7.65035
BP_RS03770	bp0757	_	gabD	NAD-dependent succinate-semialdehyde dehydrogenase	Succinate-semialdehyde dehydrogenase [NADP+] (EC 1.2.1.16)	_	_	0.00301511	7.85183	7.78805	7.65481	7.69634	7.53136	7.47485	7.54915	7.52445	7.48377	7.53019	7.5473	7.59775	7.34154	7.70321	7.22393	7.41828	7.71774	7.57583	7.50493	7.48389	7.56589
BP_RS03775	bp0758	cyaC	cyaC, hlyC	cyclolysin-activating lysine-acyltransferase	Cyclolysin-activating lysine-acyltransferase CyaC (EC 2.3.1.-)	4	A	0.722261	8.76759	8.86009	8.82331	8.62726	8.35256	8.26379	8.62024	8.24598	8.07861	8.49509	8.53937	8.40009	8.17389	8.28035	8.13639	7.76547	7.87313	7.40112	7.67632	7.48927	6.92275
BP_RS03785	bp0760	cyaA	cya, cyaA	bifunctional adenylate cyclase toxin/hemolysin CyaA	Bifunctional hemolysin/adenylate cyclase (AC-HLY) (ACT) (Cyclolysin) [Cleaved into: Calmodulin-sensitive adenylate cyclase (EC 4.6.1.1) (ATP pyrophosphate-lyase) (Adenylyl cyclase); Hemolysin]	8	_	0.810362	15.3351	15.4656	15.6087	15.7855	15.8241	15.7813	15.9496	15.9845	15.9795	16.2151	16.097	16.1023	16.0642	15.8835	16.0322	15.898	15.8183	16.0704	15.7522	15.6948	15.7601
BP_RS03790	bp0761	cyaB	cyaB	cyclolysin T1SS permease/ATPase CyaB	Cyclolysin secretion/processing ATP-binding protein CyaB (EC 3.4.22.-) (EC 7.6.2.-)	7	A	0.955536	12.2274	12.1251	12.2667	11.9479	11.7107	11.6856	11.7618	11.7113	11.7163	11.7576	11.7343	11.7254	10.9198	10.8309	10.8851	10.762	10.661	10.8528	10.2991	10.2345	9.67959
BP_RS03795	bp0762	cyaD	cyaD	cyclolysin T1SS periplasmic adaptor subunit CyaD	Protein CyaD	4	A	0.981772	11.6913	11.6488	11.7427	11.3431	11.2499	11.2511	11.1122	11.1163	11.0953	11.117	11.1345	11.1481	10.3381	10.2857	10.3342	10.2105	10.2379	10.2177	9.85843	9.85378	9.64197
BP_RS03800	bp0763	cyaE	cyaE	cyclolysin secretion protein CyaE	Protein CyaE	4	A	0.965158	11.2135	10.9981	11.1563	10.75	10.6691	10.7516	10.4975	10.541	10.3871	10.2598	10.4266	10.4089	9.31733	9.26634	9.407	9.1599	9.33645	9.46338	8.78036	9.07664	8.97624
BP_RS03805	bp0764	_	cyaX	LysR family transcriptional regulator	Probable LysR-family transcriptional regulator	4	A	0.292494	8.22872	7.97969	7.88226	7.0691	6.64276	6.85137	7.07884	6.79063	6.66567	6.57047	6.35586	6.83128	6.78264	7.0057	6.76189	6.71426	6.65101	6.55009	6.39278	5.88141	6.41353
BP_RS03810	bp0765	_	_	amino acid ABC transporter substrate-binding protein	Probable extracellular solute-binding protein	5	C	0.897283	7.66665	7.35193	7.19231	6.99009	7.19547	7.13032	7.3038	7.31999	7.11677	7.11663	7.03924	7.26483	6.76305	7.08833	6.42046	7.60593	7.79859	7.47867	8.30504	8.54161	9.03001
BP_RS03815	bp0766	_	_	amino acid ABC transporter permease	_	13	_	0.288501	7.0292	6.66455	6.536	6.54535	6.7063	6.69363	6.88752	6.57041	6.79526	6.47951	6.09197	6.35598	6.78264	7.21929	6.95593	6.44162	7.07116	6.58993	6.55429	6.35652	5.8579
BP_RS03820	bp0767	_	gltK	ABC transporter permease subunit	Glutamate/aspartate transport system permease protein	2	B	0.40666	6.56362	5.8715	5.81437	6.21677	6.15216	5.7148	6.20247	5.9845	5.93727	5.69454	5.38929	5.66856	5.95274	6.00275	6.11657	6.19958	6.28257	6.26847	6.04603	6.27241	6.69265
BP_RS03825	bp0768	_	gltL	amino acid ABC transporter ATP-binding protein	Glutamate/aspartate transport ATP-binding protein	_	_	0.0565576	4.66541	4.335	4.14482	3.93599	4.65798	4.36134	4.60042	4.52672	4.48257	4.80588	4.13995	4.20607	4.01847	5.23308	3.97309	4.70377	5.25589	5.25252	4.96779	5.27304	4.82361
BP_RS03830	bp0769	_	_	D-amino acid aminotransferase	Probable aminotransferase	3	B	0.454387	3.79059	3.22402	3.01253	4.096	3.65971	3.72629	3.12975	2.58333	4.02527	2.70997	4.42331	3.41082	4.60846	4.94817	3.59721	4.6011	4.9036	4.55012	4.39943	5.15741	6.08592
BP_RS03835	bp0770	_	_	membrane protein	Putative membrane protein	3	B	0.835814	5.08418	5.20004	5.07801	5.32023	6.68831	6.82242	6.572	6.80542	6.77051	6.06668	5.91275	5.8089	7.12499	7.68311	7.25081	8.04222	8.13799	7.6532	8.08498	8.786	10.3542
BP_RS03840	bp0771	_	_	tripartite tricarboxylate transporter substrate binding protein	Putative exported protein	5	C	0.637071	4.69012	5.3237	5.00346	5.67502	5.83922	6.05312	5.30978	5.47023	5.41123	5.80962	5.24852	5.79618	4.93007	4.96803	4.02375	5.79703	5.77802	5.85444	5.64395	5.82025	6.85465
BP_RS03845	bp0772	_	_	SDR family oxidoreductase	Putative acetoacetyl-CoA reductase (EC 1.1.1.36)	_	_	0.139539	5.11108	4.71601	5.26082	5.04515	5.48036	5.2837	4.83025	4.88653	5.63187	5.49736	4.96334	5.34011	4.88279	4.48938	4.36883	5.06653	5.04109	5.49446	5.37126	5.0388	4.59818
BP_RS03850	bp0773	_	_	acetolactate synthase	Putative acetolactate synthase large subunit (EC 2.2.1.6)	_	_	0.00490558	6.12224	5.71095	5.72233	6.12522	6.22319	6.13354	6.1076	6.08979	5.99685	6.3766	6.38885	6.06764	5.99782	6.26203	5.6359	6.02534	6.35565	6.18422	6.33379	6.41634	6.28734
BP_RS03855	bp0774	_	_	GntR family transcriptional regulator	Probable GntR-family transcriptional regulator	4	A	0.388707	8.34137	7.92464	8.10557	8.24213	8.22403	8.35099	8.51952	7.9969	8.01469	7.99214	7.85029	8.23572	7.94625	8.07476	8.07827	7.76024	7.77174	7.92397	7.62214	7.60115	8.07197
BP_RS03860	bp0775	_	_	autotransporter outer membrane beta-barrel domain-containing protein	Autotransporter domain-containing protein	10	D	0.715463	9.29736	9.09359	9.13015	8.95833	9.10065	9.31348	8.90633	9.08393	9.11921	9.01318	9.10546	9.04117	8.97511	9.37182	9.08242	8.8003	8.87207	8.6337	8.56752	8.69682	8.15979
BP_RS03865	bp0776	_	_	GntR family transcriptional regulator	Probable GntR-family transcriptional regulator	8	_	0.924475	9.64498	9.49971	9.43499	9.32113	9.2665	9.15636	10.4442	10.4598	10.4963	10.6481	10.6257	10.695	10.3757	10.3509	10.3499	10.2442	10.1069	10.2683	9.69722	9.30307	9.8055
BP_RS03870	bp0777	_	_	zinc-binding dehydrogenase	Probable Zinc-binding dehydrogenase	8	_	0.989582	6.85181	7.21893	7.20975	8.34741	8.75358	8.52305	11.8706	11.9089	12.0042	12.4499	12.2827	12.3967	13.2068	12.908	13.1496	12.1213	12.029	12.0582	11.1898	11.102	11.7091
BP_RS03875	bp0778	_	_	acyl--CoA ligase	Putative acetyl-CoA synthetase	8	_	0.993334	6.98942	6.9376	6.85922	7.818	7.78839	7.75796	11.3033	11.235	11.2359	11.5276	11.4911	11.6438	11.3485	11.2897	11.4091	11.2036	11.132	11.3265	10.1631	10.0214	10.2965
BP_RS03880	bp0779	_	_	DUF2817 domain-containing protein	Uncharacterized protein	8	_	0.990121	6.63028	6.40222	6.55754	7.44319	7.52195	7.58812	11.0444	11.117	11.1824	11.5842	11.5611	11.6064	11.6668	11.4495	11.6881	11.6198	11.4938	11.5323	10.5901	10.6294	11.2559
BP_RS03885	bp0780	_	_	ABC transporter permease	Putative membrane protein	8	_	0.973739	7.02677	7.19214	7.01525	7.45808	7.23223	7.22338	10.0453	10.1624	10.1655	10.694	10.6042	10.5898	10.7213	10.7001	10.7586	10.8173	10.7623	10.6881	9.95291	10.0267	10.844
BP_RS03890	bp0781	_	_	ABC transporter ATP-binding protein	Probable ABC transporter, ATP-binding component	1	B	0.982847	5.28839	5.41681	5.17022	6.6789	6.36574	6.39656	10.0824	10.1866	10.2437	10.5794	10.679	10.6281	10.8806	10.5981	10.7662	10.7356	10.7475	10.7974	9.81482	9.89579	10.6806
BP_RS03895	bp0782	_	_	ABC transporter substrate-binding protein	Putative exported protein	8	_	0.979328	6.8507	6.62885	6.85205	7.84667	7.99322	7.93032	11.3285	11.4483	11.5718	11.9292	11.6888	11.7791	12.4558	12.2776	12.5021	12.2886	12.2112	12.1816	11.5902	11.7869	12.8023
BP_RS03900	bp0783	_	_	VOC family protein	Putative dioxygenase	8	_	0.972506	6.00651	5.92122	5.9851	7.01831	6.96425	7.06398	10.336	10.4239	10.3801	10.6009	10.5929	10.705	10.3883	10.2383	10.3895	10.3359	10.0867	10.4812	9.03605	9.28531	9.99819
BP_RS03905	bp0784	_	ilvB	thiamine pyrophosphate-binding protein	Putative acetolactate synthase large subunit (EC 2.2.1.6)	1	B	0.975868	8.28865	7.96789	8.14269	9.26871	9.3589	9.58632	12.9093	13.037	13.0203	13.2638	13.24	13.3626	13.3937	13.2871	13.4881	13.2153	13.0859	13.2005	12.1115	12.4747	13.3889
BP_RS03910	bp0785	_	_	mechanosensitive ion channel family protein	Putative mechanosensitive channel protein	10	D	0.60282	9.71147	9.79414	9.67007	9.8051	9.73748	9.95411	9.94332	9.83725	10.011	9.85432	9.78338	9.85314	10.0556	10.0543	9.99982	9.68102	9.67256	9.75629	9.75943	9.70534	9.51584
BP_RS03920	bp0787	_	_	FUSC family protein	_	13	_	0.523921	8.3424	8.26958	8.37501	8.02282	8.46769	8.61723	8.87155	8.53408	8.36906	7.84202	7.90326	8.22738	8.6928	8.65269	8.88964	8.28604	8.34237	8.26376	7.79534	8.16103	8.65188
BP_RS03925	bp0789	_	ilvI	acetolactate synthase 3 catalytic subunit	Acetolactate synthase (EC 2.2.1.6)	7	A	0.854742	12.7093	12.6251	12.5288	11.6796	11.5018	11.4926	11.6287	11.7089	11.6584	11.6954	11.6768	11.6856	11.7047	11.6336	11.6621	11.1184	10.9659	11.0572	11.0253	10.6071	9.99304
BP_RS03930	bp0790	ilvN	ilvH	acetolactate synthase small subunit	Acetolactate synthase (EC 2.2.1.6)	4	A	0.895421	12.2404	11.951	11.7729	10.9214	11.0688	11.0146	11.1731	11.1519	10.9962	11.0383	10.9358	10.917	10.9474	10.9314	10.8992	10.2951	10.275	10.5725	10.3067	9.99453	10.3458
BP_RS03935	bp0791	ilvC	ilvC	ketol-acid reductoisomerase	Ketol-acid reductoisomerase (NADP(+)) (KARI) (EC 1.1.1.86) (Acetohydroxy-acid isomeroreductase) (AHIR) (Alpha-keto-beta-hydroxylacyl reductoisomerase) (Ketol-acid reductoisomerase type 1) (Ketol-acid reductoisomerase type I)	10	D	0.867923	11.7064	11.8219	11.7233	11.2741	11.7112	11.6823	11.5179	11.6607	11.7231	11.91	11.806	11.8195	12.0455	11.7834	11.9913	11.2321	11.1521	11.2436	11.2914	11.1571	11.2559
BP_RS03940	bp0792	pssA	pssA	CDP-diacylglycerol--serine O-phosphatidyltransferase	CDP-diacylglycerol--serine O-phosphatidyltransferase (EC 2.7.8.8) (Phosphatidylserine synthase)	4	A	0.895353	12.9804	13.0003	12.9718	12.5533	12.5015	12.476	12.1109	12.1373	12.1928	12.2426	12.2618	12.3427	12.4319	12.186	12.3803	11.7237	11.7022	11.876	11.7566	11.5815	11.7727
BP_RS03945	bp0793	_	_	lipoprotein	Putative lipoprotein	4	A	0.897177	11.0105	10.9532	10.9105	10.4302	10.2799	10.285	10.1	10.1624	10.2128	10.1766	10.2073	10.0628	10.6279	10.5482	10.6155	9.90352	9.93029	9.97652	9.92908	9.97641	9.87734
BP_RS03955	bp0794	rpsO	rpsO	30S ribosomal protein S15	30S ribosomal protein S15	4	A	0.623033	12.5002	12.5228	12.4813	11.1464	10.7172	10.7208	10.4905	10.5081	10.6768	11.0795	11.0493	11.0081	10.4524	10.3301	10.3741	9.94078	9.98436	9.76657	10.5652	10.2902	8.64377
BP_RS03960	bp0795	pnp	pnp	polyribonucleotide nucleotidyltransferase	Polyribonucleotide nucleotidyltransferase (EC 2.7.7.8) (Polynucleotide phosphorylase) (PNPase)	4	A	0.869975	15.8042	15.7731	15.6309	14.6568	14.822	14.8191	14.5563	14.7093	14.675	14.8804	14.82	14.7283	14.5042	14.3494	14.4815	14.0987	13.9506	14.1425	14.3219	14.1513	13.7347
BP_RS03965	bp0796	_	_	lipoprotein	Putative lipoprotein	4	A	0.702395	9.2628	9.10772	9.04445	8.75559	8.62027	8.59766	8.62453	8.56791	8.65956	8.52135	8.59159	8.58199	8.53837	8.54478	8.62619	8.25772	8.43296	8.10829	8.15979	8.09744	7.23726
BP_RS03975	bp0798	_	tdcB	threonine ammonia-lyase	Threonine dehydratase catabolic (EC 4.3.1.19)	4	A	0.611818	7.98799	7.99927	7.82803	7.59956	7.47962	7.33516	7.06507	7.11235	6.98622	6.78049	6.86935	7.14142	7.10219	7.33589	7.22768	6.87389	6.72455	7.1234	6.68035	6.59952	6.42095
BP_RS03980	bp0799	_	_	PIN domain-containing protein	PINc domain-containing protein	4	A	0.812471	8.74976	8.82229	8.80426	7.94009	7.27549	7.03076	7.21833	6.88071	6.85143	7.36413	7.35914	7.45588	7.38717	6.62587	7.01862	6.29506	6.02025	6.38053	6.3236	5.48289	5.02967
BP_RS03990	bp0800	_	_	NAD(P)H-quinone oxidoreductase	Probable zinc-binding dehydrogenase	9	D	0.601453	11.3273	11.286	11.284	11.4457	11.3953	11.3946	11.3473	11.3837	11.3171	11.4059	11.3486	11.2929	11.7691	11.5413	11.6262	11.3694	11.2143	11.3903	11.392	11.3547	11.201
BP_RS03995	bp0801	_	tpiA, tpi	triose-phosphate isomerase	Triosephosphate isomerase (TIM) (TPI) (EC 5.3.1.1) (Triose-phosphate isomerase)	4	A	0.741496	11.7694	11.8826	11.9473	11.6917	11.2988	11.3647	11.4071	11.6162	11.5884	11.7774	11.7883	11.7159	11.6746	11.3885	11.6045	10.9335	10.9928	11.0688	11.1653	10.6745	9.84411
BP_RS04000	bp0802	secG	secG	preprotein translocase subunit SecG	Protein-export membrane protein SecG	7	A	0.70481	11.0607	10.9709	10.9379	10.6681	10.4222	10.5286	10.6877	10.631	10.4512	10.6095	10.6435	10.6823	10.8824	10.5899	10.7865	10.2303	10.1313	10.1917	10.2818	9.99394	9.13187
BP_RS04010	bp0804	betT	betT	choline BCCT transporter BetT	High-affinity choline transport protein	12	_	0.822857	8.67403	8.60405	8.53644	8.46528	8.51436	8.72524	8.46434	8.57957	8.63618	8.33458	8.44438	8.11198	9.14035	9.15765	8.96394	8.90367	8.9065	8.8296	8.92109	8.98611	9.33754
BP_RS04015	bp0805	_	_	IclR family transcriptional regulator	Probable transcriptional regulator	3	B	0.84124	7.45159	7.54422	7.46609	7.37145	7.52195	7.43562	7.80499	7.86224	7.83063	7.82908	7.87702	7.72618	8.01961	8.35794	8.09292	8.3602	8.3615	8.30711	8.18611	8.47568	8.33977
BP_RS04020	bp0806	_	_	methylaspartate ammonia-lyase	Methylaspartate ammonia-lyase (EC 4.3.1.2)	3	B	0.842242	7.69815	7.91755	8.00809	7.70353	7.7077	7.75429	7.96692	7.94388	8.08364	8.03723	8.09189	7.73458	7.92946	8.29639	7.7463	8.7224	8.82138	8.55785	8.60457	9.12735	8.80225
BP_RS04025	bp0807	_	_	tripartite tricarboxylate transporter substrate binding protein	Putative exported protein	3	B	0.798103	6.50164	6.17487	6.19669	6.21677	6.73915	6.50291	6.76543	6.4738	6.79961	6.58573	6.4383	6.81374	6.61917	6.70764	6.75292	7.44816	7.44384	7.33441	7.41294	7.56588	8.21223
BP_RS04030	bp0808	_	_	MmgE/PrpD family protein	Uncharacterized protein	5	C	0.665215	6.49875	6.78039	6.66195	6.84726	6.66683	6.61213	6.78982	6.75295	6.97341	6.92665	6.79479	6.99764	6.66668	6.42576	6.46257	7.29736	7.35396	7.45877	7.42528	7.60925	7.56131
BP_RS04035	bp0809	_	_	argininosuccinate lyase	_	5	C	0.861365	6.9766	7.07241	7.17134	7.26935	7.22517	6.74389	7.12159	7.27047	7.27902	7.40201	7.2152	7.19798	6.57524	6.47104	6.6371	7.72521	7.79334	7.73236	7.88641	8.21999	7.70467
BP_RS04040	bp0810	_	_	tripartite tricarboxylate transporter substrate binding protein	Putative exported protein	_	_	0.197448	7.89365	7.82701	7.77874	7.90754	7.96542	7.93767	8.25564	7.75976	7.80853	7.9463	8.06889	7.87655	7.61721	7.70952	7.62651	7.91848	7.99219	7.97036	7.78716	7.98895	8.05516
BP_RS04045	bp0812	_	_	IS110-like element IS1663 family transposase	_	_	_	0.00235225	0.947074	0	0	0	0	0.951598	0	0	0.900406	1.16625	0	1.90932	0	1.90341	0	0	0	0	0	0	0
BP_RS04050	bp0813	_	_	SDR family oxidoreductase	Probable short-chain dehydrogenase	3	B	0.741351	8.58228	8.57591	8.49037	8.7188	8.72741	8.54175	8.55634	8.58346	8.67949	8.9873	8.88848	8.67573	9.06489	8.77125	8.89788	9.11614	9.06	9.04783	9.12475	9.16898	9.46797
BP_RS04055	bp0814	lrhA	_	transcriptional regulator LrhA	Probable LysR-family transcriptional regulator	4	A	0.385154	9.93974	9.83745	9.64796	9.53692	9.48733	9.84182	9.51455	9.63775	9.45841	9.22283	9.02138	9.25199	9.10834	9.34966	9.3392	9.20216	9.29256	9.54552	9.18051	9.23763	9.57105
BP_RS04060	bp0815	metC	metC	cystathionine beta-lyase	Cystathionine beta-lyase (EC 4.4.1.8)	3	B	0.751752	7.83683	7.64148	7.79062	7.69634	7.9861	7.86497	8.09183	8.07894	8.07771	8.04664	8.00386	8.15258	8.35884	8.33559	8.3404	8.36006	8.40569	8.31323	8.62308	8.67658	9.02838
BP_RS04065	bp0816	_	_	succinylglutamate desuccinylase/aspartoacylase family protein	Uncharacterized protein	1	B	0.722887	6.21482	6.2038	6.36011	6.70798	6.99457	7.09719	6.90618	7.39037	7.18783	7.1808	7.05528	7.1454	7.41453	7.17437	7.11742	7.56937	7.44269	7.4298	7.72854	7.80843	8.15979
BP_RS04070	bp0817	_	_	tripartite tricarboxylate transporter substrate binding protein	Putative exported protein	2	B	0.617715	7.99566	7.64148	7.83617	7.67909	7.78257	7.67644	7.79729	7.59769	7.64742	7.72164	7.69703	7.85488	7.42201	7.85326	7.55617	8.0979	8.02156	7.9748	8.20985	8.08957	8.48943
BP_RS04075	bp0818	_	_	rhodanese-like domain-containing protein	Uncharacterized protein	5	C	0.633024	7.75121	7.90782	7.73098	7.65792	7.60709	7.95243	7.89994	7.90494	7.88431	8.11372	7.82991	7.92638	7.62624	7.75904	7.7463	8.25193	8.26102	8.02656	8.253	8.45681	8.53054
BP_RS04080	bp0819	_	_	tripartite tricarboxylate transporter substrate binding protein	Putative exported protein	3	B	0.845908	6.39937	6.44822	6.79037	7.16214	7.34116	7.61751	7.53536	7.6044	7.68758	7.76338	7.74195	7.75311	7.51101	7.4326	7.53586	8.17794	8.05704	8.38466	8.54273	8.72863	9.50454
BP_RS04085	bp0820	_	_	FAD-binding oxidoreductase	DAO domain-containing protein	5	C	0.749974	6.56823	6.55349	6.68015	7.35577	7.01171	6.93537	7.41324	7.39073	7.4172	7.29325	7.31992	7.36231	7.18566	7.29359	7.15536	7.56868	7.64964	7.80559	7.80089	7.90207	8.46571
BP_RS04090	bp0821	_	hyuB	hydantoinase B/oxoprolinase family protein	Hydantoin utilization protein B	2	B	0.911424	7.1179	7.285	7.39871	7.97939	8.06972	8.07329	8.08562	8.08552	8.1626	8.39376	8.08892	8.37169	8.68969	8.51392	8.61656	9.00826	8.81038	8.95099	9.15158	9.33146	9.86414
BP_RS04095	bp0822	_	hyuA	hydantoinase/oxoprolinase family protein	Hydantoin utilization protein A	3	B	0.905507	7.13283	7.27105	7.24036	7.50941	7.9088	7.97327	7.78329	7.8807	8.00499	8.16434	7.7371	7.66626	8.51087	8.35392	8.54904	8.76215	8.69009	8.6826	9.14015	9.14796	9.75871
BP_RS04100	bp0823	_	_	helix-turn-helix domain-containing protein	Putative transcriptional regulator	_	_	0.166603	8.64894	8.82639	8.97063	8.572	8.60079	8.59222	8.51763	8.60752	8.49709	8.5985	8.51299	8.66912	8.7909	8.83922	8.6513	8.55563	8.74365	8.69877	8.64539	8.56559	8.60519
BP_RS04105	bp0824	azu	_	azurin	Azurin	7	A	0.910645	11.0744	11.3214	10.8818	13.1454	13.5124	13.6624	12.4328	12.6126	12.6106	12.4686	12.4239	12.5203	12.9423	12.7665	12.8458	12.5027	12.3932	12.3456	12.6988	12.8126	12.7223
BP_RS04110	bp0825	_	_	transcriptional regulator	PadR domain-containing protein	4	A	0.846957	8.90936	9.26884	9.11303	9.91553	9.77848	9.88968	9.07044	9.22004	9.26578	8.92343	9.24791	9.14243	9.24811	9.37654	9.18557	8.7532	9.09758	8.80991	8.9136	8.80793	8.4743
BP_RS04115	bp0826	_	_	efflux transporter outer membrane subunit	Outer membrane component of multidrug efflux system	10	D	0.384263	9.18457	8.9147	8.9603	9.18854	8.57798	8.46097	9.02971	8.65626	8.7163	8.65773	8.67028	8.89205	9.10181	9.36841	8.87673	8.7453	9.05189	8.66461	8.71638	8.68805	7.60889
BP_RS04120	bp0827	_	_	MexW/MexI family multidrug efflux RND transporter permease subunit	Integral membrane component of multidrug efflux system	2	B	0.549969	7.00471	7.01941	7.01498	7.28307	7.01878	7.34794	7.28592	6.93892	6.98686	6.77109	7.10196	6.70373	7.08232	7.36735	7.08812	7.74696	7.77747	7.63415	7.32482	7.52754	7.39032
BP_RS04125	bp0828	_	_	efflux RND transporter periplasmic adaptor subunit	Probable HlyD-family secretion protein	12	_	0.424787	6.02933	5.85452	5.65801	6.10729	6.43206	6.19875	5.64989	6.14782	6.04093	5.95021	5.27631	5.55767	6.05535	6.05847	6.10868	6.64069	6.65484	6.79203	5.5496	6.06414	6.028
BP_RS04130	bp0829	_	_	transcriptional regulator	Putative transcriptional regulator	8	_	0.413287	8.68015	8.6277	8.77224	8.99399	9.30461	9.23605	9.17356	9.26794	9.30654	8.86127	9.05278	9.04869	9.26743	9.34767	9.25323	9.2847	9.41023	9.36347	8.99861	9.21267	9.38946
BP_RS04140	bp0831	betT	betT	choline BCCT transporter BetT	High-affinity choline transport protein	3	B	0.903272	9.84272	9.88257	9.99229	10.6662	10.5958	10.6418	10.6526	10.6054	10.5898	10.5293	10.5271	10.5146	10.9974	10.8513	10.9076	11.398	11.3385	11.3992	11.3534	11.5801	12.1708
BP_RS04145	bp0832	_	_	LysR family transcriptional regulator	LysR-family transcriptional regulator	5	C	0.505165	7.75967	8.05595	7.99361	8.05525	7.74052	7.74925	8.06051	7.67417	7.85184	7.7624	7.80925	7.8383	7.38455	7.4554	7.41801	7.67715	7.92449	7.96864	7.86697	7.83789	8.26675
BP_RS04150	bp0833	_	_	diacylglycerol kinase	_	5	C	0.58329	8.02823	8.1317	8.20106	8.69061	8.94649	8.8965	8.7516	8.65626	8.84555	8.62768	8.67509	8.7001	8.21967	8.23583	8.40599	8.76863	8.87705	8.94275	8.64082	8.99979	9.18169
BP_RS04155	bp0834	_	_	metallophosphoesterase	Probable DNA repair exonuclease	_	_	0.202133	5.79568	5.50508	5.10521	5.72172	5.60057	5.60921	5.78842	5.20755	5.56103	4.52703	5.59883	5.09068	5.73042	6.70894	5.8218	5.72547	6.06274	5.78489	5.55463	5.98733	6.23361
BP_RS04160	bp0835	_	_	phosphatase PAP2 family protein	Putative membrane protein	7	A	0.580051	8.20487	8.35054	8.18513	7.82953	7.9088	8.04761	7.50331	7.87016	7.73714	7.49339	7.76966	7.72618	7.10219	6.80858	7.04207	7.4496	7.63209	7.43845	7.57539	7.65134	7.43545
BP_RS04165	bp0836	_	_	hypothetical protein	Putative exported protein	_	_	0.0112114	6.01921	5.7075	5.86297	5.4567	5.42354	4.80593	4.22656	4.52672	5.20759	4.47641	5.06011	4.34135	4.46301	4.76219	5.04085	5.35799	4.45618	4.94026	5.17719	4.96295	3.73257
BP_RS04170	bp0837	_	_	PaaI family thioesterase	4HBT domain-containing protein	_	_	0.00359229	5.3807	5.41681	5.3734	4.88869	4.54265	4.98484	4.27042	4.41159	4.3289	4.64432	4.5487	4.67024	4.8616	4.29787	4.8255	4.19641	4.72617	4.72046	4.86044	4.27432	3.57615
BP_RS04175	bp0838	_	_	TetR/AcrR family transcriptional regulator	_	_	_	0.184882	6.42982	6.1848	6.17673	6.13923	5.75259	5.89869	5.54518	4.95231	5.52915	5.78975	5.33971	5.8204	5.68081	6.27694	5.85547	5.75134	5.97393	6.077	5.60393	5.63124	6.35025
BP_RS04185	bp0840	_	_	porin	Outer membrane porin protein BP0840	4	A	0.778529	16.7166	17.1922	17.3409	17.4776	17.6777	17.572	17.3466	17.5129	17.6175	17.9008	17.8143	17.701	18.0838	17.6591	17.7926	17.3819	17.2717	17.4299	17.1718	17.081	17.2265
BP_RS04190	bp0841	_	nuoA	NADH-quinone oxidoreductase subunit A	NADH-quinone oxidoreductase subunit A (EC 7.1.1.-) (NADH dehydrogenase I subunit A) (NDH-1 subunit A) (NUO1)	4	A	0.537609	12.0831	12.1714	12.1733	11.8161	11.2674	11.134	11.0876	10.8475	11.0182	11.5586	11.5358	11.6169	11.686	11.3074	11.5286	11.0586	10.9774	11.0722	11.317	10.6419	9.46719
BP_RS04195	bp0842	_	nuoB	NADH-quinone oxidoreductase subunit B	NADH-quinone oxidoreductase subunit B (EC 7.1.1.-) (NADH dehydrogenase I subunit B) (NDH-1 subunit B)	10	D	0.744093	11.6489	11.7545	11.8406	11.7076	11.6717	11.6426	11.6373	11.7077	11.7376	11.8305	11.7751	11.7555	12.3957	12.3376	12.4663	11.8498	11.774	12.0235	11.6295	11.1759	10.234
BP_RS04200	bp0843	_	nuoC	NADH-quinone oxidoreductase subunit C	NADH-quinone oxidoreductase subunit C (EC 7.1.1.-) (NADH dehydrogenase I subunit C) (NDH-1 subunit C)	4	A	0.768673	11.9108	12.0893	12.0134	11.7005	11.7469	11.6481	11.583	11.6901	11.5632	11.7663	11.6132	11.7135	12.1386	11.9052	11.9849	11.3122	11.2568	11.4436	11.4573	11.0541	10.5404
BP_RS04205	bp0844	_	nuoD	NADH-quinone oxidoreductase subunit D	NADH-quinone oxidoreductase subunit D (EC 7.1.1.-) (NADH dehydrogenase I subunit D) (NDH-1 subunit D)	4	A	0.877165	13.6138	13.6033	13.5607	13.3089	13.3304	13.3185	13.2067	13.2499	13.2998	13.3089	13.2308	13.2842	13.3836	13.2869	13.4038	12.955	12.8787	13.16	12.9574	12.6898	12.7337
BP_RS04210	bp0845	nuoE	nuoE	NADH-quinone oxidoreductase subunit NuoE	Respiratory-chain NADH dehydrogenase I, 24 kDa subunit (EC 1.6.5.3)	4	A	0.83444	12.0006	12.0832	12.11	11.6359	11.5955	11.5004	11.3383	11.3544	11.3178	11.4354	11.4139	11.4614	11.5304	11.2887	11.5088	11.0409	11.0721	11.3163	11.0463	10.7858	10.6516
BP_RS04215	bp0846	nuoF	nuoF	NADH-quinone oxidoreductase subunit NuoF	NADH-quinone oxidoreductase subunit F (EC 7.1.1.-)	7	A	0.842058	13.7185	13.7265	13.7313	13.4982	13.529	13.4451	13.1544	13.3318	13.2921	13.4272	13.3143	13.2845	13.4447	13.2933	13.4262	12.9842	12.8684	13.0748	13.0108	12.8623	12.8007
BP_RS04220	bp0847	_	nuoG	NADH-quinone oxidoreductase subunit G	NADH-quinone oxidoreductase (EC 7.1.1.-)	10	D	0.781381	13.5138	13.564	13.6369	13.3421	13.4502	13.4261	13.1754	13.3031	13.3101	13.3869	13.3676	13.3158	13.5482	13.4653	13.6169	12.9285	12.9125	13.0966	13.0246	12.9986	13.3249
BP_RS04225	bp0848	nuoH	nuoH	NADH-quinone oxidoreductase subunit NuoH	NADH-quinone oxidoreductase subunit H (EC 7.1.1.-) (NADH dehydrogenase I subunit H) (NDH-1 subunit H)	4	A	0.73189	12.879	12.977	12.9664	12.5595	12.7275	12.6505	12.2999	12.4798	12.3916	12.6527	12.559	12.5246	12.5949	12.3928	12.5945	12.2201	11.961	12.2912	12.261	12.1785	12.4487
BP_RS04230	bp0849	nuoI	nuoI	NADH-quinone oxidoreductase subunit NuoI	NADH-quinone oxidoreductase subunit I (EC 7.1.1.-) (NADH dehydrogenase I subunit I) (NDH-1 subunit I)	4	A	0.454909	11.3927	11.5098	11.6805	11.1237	11.1471	11.0455	11.0554	11.0185	10.9557	11.1111	10.9887	11.0662	11.2158	11.0435	11.1414	10.7789	10.603	10.9143	10.8645	10.8622	11.1209
BP_RS04235	bp0850	_	nuoJ	NADH-quinone oxidoreductase subunit J	NADH-quinone oxidoreductase subunit J (EC 7.1.1.-)	4	A	0.629191	12.3221	12.3506	12.3455	11.9829	12.0608	11.9505	11.6626	11.7084	11.7924	12.0038	11.8657	11.928	11.9419	11.5338	11.8125	11.4958	11.2067	11.6141	11.573	11.4171	11.9475
BP_RS04240	bp0851	nuoK	nuoK	NADH-quinone oxidoreductase subunit NuoK	NADH-quinone oxidoreductase subunit K (EC 7.1.1.-) (NADH dehydrogenase I subunit K) (NDH-1 subunit K)	7	A	0.723528	11.153	11.3033	11.2727	10.6737	10.6787	10.7652	10.6693	10.7236	10.5737	10.5917	10.6833	10.6644	10.4629	10.4007	10.5626	10.2245	10.0973	10.3441	10.1293	10.0657	10.5404
BP_RS04245	bp0852	nuoL	nuoL	NADH-quinone oxidoreductase subunit L	NADH-ubiquinone oxidoreductase, chain L (EC 1.6.5.3)	7	A	0.820905	14.1205	14.1411	14.1601	13.4924	13.5576	13.5304	13.1335	13.2974	13.2873	13.4064	13.3142	13.3275	13.2387	12.9669	13.0835	12.8962	12.6973	12.9782	12.8421	12.73	13.1041
BP_RS04250	bp0853	_	nuoM	NADH-quinone oxidoreductase subunit M	NADH-ubiquinone oxidoreductase, chain M (EC 1.6.5.3)	4	A	0.862994	13.3609	13.4218	13.4335	12.675	12.7031	12.6589	12.3179	12.4474	12.3851	12.5372	12.4464	12.511	12.3208	12.0925	12.3309	12.0119	11.906	12.1057	12.077	12.0034	12.3358
BP_RS04255	bp0854	nuoN	nuoN	NADH-quinone oxidoreductase subunit NuoN	NADH-quinone oxidoreductase subunit N (EC 7.1.1.-) (NADH dehydrogenase I subunit N) (NDH-1 subunit N)	4	A	0.688215	13.1474	13.1489	13.1334	12.4334	12.5796	12.5469	12.1823	12.2485	12.3231	12.3518	12.3661	12.4167	12.1955	11.8701	12.1142	11.9894	11.7639	12.023	11.8939	12.0002	12.4518
BP_RS04260	bp0855	_	_	DUF2818 family protein	Putative membrane protein	4	A	0.917063	10.0355	9.91049	9.87528	9.66471	9.3674	9.39236	9.5459	9.19125	9.41639	9.13631	9.26751	9.15702	8.08943	7.97786	8.23611	8.68582	8.30937	8.31323	8.57434	8.57087	8.48726
BP_RS04265	bp0856	_	bfrD, vir90	TonB-dependent siderophore receptor	Probable TonB-dependent receptor BfrD (Virulence-associated outer membrane protein Vir-90)	6	_	0.883176	14.2504	14.3691	14.4738	15.1734	15.4083	15.4414	15.6123	15.69	15.7477	15.9133	15.81	15.8184	15.8194	15.8241	15.8723	16.24	16.0057	16.3055	16.2332	16.2738	16.8249
BP_RS04270	bp0857	_	bfrE	TonB-dependent siderophore receptor	Probable TonB-dependent receptor for iron transport	8	_	0.768817	9.97405	10.0781	10.1576	10.7681	10.9161	10.7688	11.1577	11.1965	11.1387	11.3128	11.2817	11.2277	11.903	12.2221	11.598	11.7648	11.9545	11.3752	11.8247	11.9813	11.2257
BP_RS04275	bp0858	_	_	GNAT family N-acetyltransferase	Probable GnaT-family acetyltransferase	_	_	0.207704	8.88248	8.87946	8.79111	8.75555	8.92018	8.57294	8.85372	8.72394	8.61111	8.66602	8.58069	8.76706	8.82999	8.38073	8.44075	8.93039	8.85147	8.7695	8.98332	8.91296	8.65188
BP_RS04280	bp0859	_	_	SDR family oxidoreductase	Short-chain dehydrogenase	_	_	0.0209924	6.20639	6.42005	6.03245	5.60541	5.81457	5.26018	5.31339	5.58305	5.9218	5.65893	5.48653	5.8089	6.08393	5.98022	5.42245	5.70086	5.98383	5.54312	5.49112	5.41043	5.76205
BP_RS04285	bp0860	_	_	acetolactate synthase large subunit	Putative acetolactate synthase large subunit (EC 2.2.1.6)	5	C	0.605395	6.53656	7.01244	6.73876	6.51709	6.634	6.51685	6.35436	6.40746	6.55408	6.8454	6.60638	6.75828	5.8658	5.73536	5.82047	6.51405	6.35135	6.63576	6.47499	6.7156	6.83752
BP_RS04290	bp0861	_	_	tripartite tricarboxylate transporter substrate binding protein	Putative exported protein	5	C	0.484854	7.28968	7.17856	7.06639	6.82917	6.95029	7.25824	7.20348	7.23418	7.10165	7.26212	6.92823	7.23449	6.01984	7.14673	6.53284	7.22686	7.53638	7.25909	7.30449	7.59395	7.18205
BP_RS04295	bp0862	_	_	LysR family transcriptional regulator	Probable LysR-family transcriptional regulator	10	D	0.766394	9.18433	9.11084	9.079	8.60928	8.30622	8.33866	8.49534	8.22014	8.2816	8.18142	8.10326	8.35934	9.05413	9.44681	9.19822	8.56226	9.08936	8.35812	8.12542	8.43769	7.8863
BP_RS04300	bp0863	serB	serB	phosphoserine phosphatase SerB	O-phosphoserine phosphohydrolase (EC 3.1.3.3) (Phosphoserine phosphatase)	7	A	0.864005	9.76259	9.86224	9.89427	9.85895	9.77163	9.81587	9.56138	9.65089	9.62238	9.69634	9.68849	9.74346	9.53189	9.38865	9.61472	9.09998	8.90409	9.19582	9.02623	8.98611	8.72469
BP_RS04305	bp0864	mfd	mfd	transcription-repair coupling factor	Transcription-repair-coupling factor (TRCF) (EC 3.6.4.-)	4	A	0.941131	12.5553	12.5613	12.5593	12.2319	11.9014	11.8642	12.0188	11.8607	11.7689	11.7701	11.8622	11.8393	11.6729	11.6081	11.7534	11.1849	11.0593	11.4563	10.9612	10.7961	10.6769
BP_RS04310	bp0865	_	ispD	2-C-methyl-D-erythritol 4-phosphate cytidylyltransferase	2-C-methyl-D-erythritol 4-phosphate cytidylyltransferase (EC 2.7.7.60) (4-diphosphocytidyl-2C-methyl-D-erythritol synthase) (MEP cytidylyltransferase) (MCT)	4	A	0.638334	8.92642	8.57456	8.84055	8.79152	8.81625	8.80648	8.55505	8.6211	8.61357	8.19483	8.633	8.66709	8.47338	8.36856	8.49688	7.96479	8.17076	8.16562	8.13544	7.88425	7.86548
BP_RS04315	bp0866	_	ispF, mecS	2-C-methyl-D-erythritol 2%2C4-cyclodiphosphate synthase	2-C-methyl-D-erythritol 2,4-cyclodiphosphate synthase (MECDP-synthase) (MECPP-synthase) (MECPS) (EC 4.6.1.12)	10	D	0.667888	8.72992	8.8226	8.91916	8.75857	9.06442	9.03628	8.74761	8.89639	8.93226	8.69824	8.8202	8.98392	9.33167	9.07361	9.21492	8.5787	8.62458	8.45033	8.57922	8.65026	8.77925
BP_RS04330	bp0868	_	fbp	class 1 fructose-bisphosphatase	Fructose-1,6-bisphosphatase class 1 (FBPase class 1) (EC 3.1.3.11) (D-fructose-1,6-bisphosphate 1-phosphohydrolase class 1)	9	D	0.949323	10.9904	11.1713	11.221	11.3154	11.4522	11.4219	11.1263	11.1537	11.2604	11.4818	11.3207	11.3373	12.2794	12.0246	12.1061	11.284	11.2504	11.2981	11.4732	11.4384	11.5546
BP_RS04335	bp0869	pepN	pepN	aminopeptidase N	Aminopeptidase N (EC 3.4.11.2)	10	D	0.840291	11.9882	11.9816	12.0599	11.8436	12.0343	11.9709	11.8741	11.9464	11.8807	12.0229	11.8317	11.8501	12.4391	12.39	12.5272	12.0018	11.86	12.015	12.0154	12.0156	12.2871
BP_RS04340	bp0870	_	_	DUF4136 domain-containing protein	Putative exported protein	2	B	0.732247	9.68867	9.59838	9.58359	9.50346	9.61423	9.69587	9.4056	9.25215	9.26039	9.13532	9.14708	9.18459	9.6458	9.49138	9.47639	9.51171	9.71125	9.27925	9.72617	9.96391	10.1306
BP_RS04350	bp0872	_	_	ABC transporter ATP-binding protein	ABC transporter, ATP-binding protein	4	A	0.552277	9.6719	9.56587	9.55404	9.06543	8.58732	8.7797	8.81296	8.79728	8.81952	8.8535	8.98929	9.11916	8.879	8.98111	8.88523	8.68895	8.58127	8.70799	8.50108	8.55765	8.39468
BP_RS04355	bp0873	_	tpm	thiopurine S-methyltransferase	Thiopurine S-methyltransferase (EC 2.1.1.67) (Thiopurine methyltransferase)	3	B	0.584791	9.54137	9.50327	9.68442	9.50113	9.67518	9.58957	9.57916	9.63447	9.67909	9.66267	9.68093	9.61766	9.98492	9.76205	9.91857	9.70132	9.60208	9.69299	9.82285	9.9513	9.99039
BP_RS19500	bp0874	_	vir-18	hypothetical protein	Vir-repressed protein	12	_	0.609358	7.22672	7.3027	7.40118	7.02715	7.37291	7.22098	7.407	6.98675	7.08911	7.03475	7.19487	7.3403	7.96952	7.78571	8.00977	7.1786	7.57404	7.45877	7.69223	7.42738	7.69958
BP_RS19505	bp0875	_	_	hypothetical protein	Putative exported protein	3	B	0.572514	5.63673	5.63343	5.54325	5.96809	5.91764	6.21951	5.98914	5.86194	6.03486	5.80997	5.72706	5.79618	6.22213	6.42534	6.53085	6.60407	6.7381	6.39381	6.45447	6.83292	7.4125
BP_RS04360	bp0876	_	_	DUF3313 domain-containing protein	Putative lipoprotein	3	B	0.731272	8.8781	8.89822	9.02636	9.13376	9.17506	9.14835	9.09113	9.1943	9.28486	9.28839	9.18326	9.22729	9.58797	9.3855	9.3361	9.56696	9.46429	9.51382	9.57245	9.67259	9.97481
BP_RS04365	bp0877	_	ycgR	flagellar brake protein	Flagellar brake protein YcgR (Cyclic di-GMP binding protein YcgR)	4	A	0.752161	7.97368	8.2269	8.1065	7.65305	7.55596	7.78236	7.43722	7.43936	7.38093	7.27764	7.12228	7.21635	7.77192	7.57264	7.60132	6.87468	6.85307	6.66646	6.74222	6.69921	5.71159
BP_RS04370	bp0878	_	_	phospholipase A	Phospholipase A1 (EC 3.1.1.32) (EC 3.1.1.4) (Phosphatidylcholine 1-acylhydrolase)	4	A	0.787322	10.5648	10.5357	10.5083	9.9881	9.7323	9.63974	9.6355	9.62096	9.51692	9.61566	9.65218	9.71461	9.25641	9.411	9.42716	8.99851	8.96239	9.05189	9.10825	8.92674	8.26675
BP_RS04375	bp0879	_	_	aldehyde dehydrogenase family protein	_	9	D	0.957726	11.4836	11.3948	11.4309	11.5118	11.4215	11.4077	11.4704	11.4895	11.5136	11.5378	11.5992	11.5791	12.5548	12.5511	12.6165	11.6481	11.6581	11.6468	11.8695	11.8329	11.5777
BP_RS04385	bp0880	_	_	HD domain-containing protein	_	_	_	0.129114	6.84463	7.05765	7.00288	7.18004	7.30482	7.22442	7.51259	7.38247	7.43249	7.59847	7.19487	7.29043	7.53242	7.46336	7.60669	7.45988	7.67841	7.29167	7.38607	7.32706	7.27931
BP_RS04390	bp0882	_	_	MmgE/PrpD family protein	Uncharacterized protein	5	C	0.664318	5.70425	5.39589	5.50279	5.77267	6.05628	6.12716	6.51124	6.29355	6.18599	6.42908	6.61595	6.49941	5.68081	5.93785	5.30258	7.36459	6.87632	6.85121	6.57549	6.63352	7.39032
BP_RS04395	bp0883	accB	_	acetyl-CoA carboxylase biotin carboxyl carrier protein	Biotin carboxyl carrier protein of acetyl-CoA carboxylase	_	_	0.00864586	3.55491	3.40477	3.70989	4.11319	4.15675	4.20467	4.57732	3.85019	4.34387	3.82503	3.63611	4.52507	3.39885	4.0472	3.42149	4.60883	4.83745	3.46645	4.00701	3.6542	4.00221
BP_RS04400	bp0884	_	_	carboxylase	Probable carboxylase	5	C	0.730664	5.55236	5.2988	5.1319	6.19877	6.19781	5.97096	6.23277	6.4738	6.28852	6.1727	6.39489	6.30539	4.91851	5.41483	4.97871	6.84128	6.40603	6.57678	6.11771	6.03899	6.39776
BP_RS04405	bp0885	_	_	hypothetical protein	Uncharacterized protein	_	_	0.0622133	1.00582	2.35044	2.68831	3.04388	2.47845	2.98714	2.70879	2.58333	2.88536	2.95306	3.51017	2.92329	1.73959	2.59688	2.48417	3.61512	3.5375	3.74133	2.67642	3.35761	3.97974
BP_RS04410	bp0886	_	_	amidohydrolase	Amidohydro-rel domain-containing protein	_	_	0.198189	4.30449	4.94483	5.21942	5.60541	5.16492	5.30908	5.11051	5.55514	5.16241	4.93691	5.21107	5.49339	4.61993	4.76219	4.95041	5.05398	5.63038	5.95641	4.90204	5.23655	5.96344
BP_RS04415	bp0887	_	_	SDR family oxidoreductase	Epimerase domain-containing protein	_	_	0.0250328	6.74317	6.6388	6.7086	6.72666	6.64502	7.16271	7.38554	7.00929	6.91216	6.81198	6.55105	6.60518	7.04134	6.92382	6.68263	7.20257	7.08408	7.06861	6.83395	6.73096	6.82019
BP_RS04420	bp0888	_	_	GntR family transcriptional regulator	GntR-family transcriptional regulator	5	C	0.7748	7.73256	8.18314	7.97899	8.69749	9.03509	8.87502	8.61593	8.95051	9.00114	9.06949	8.94521	8.82348	8.58305	8.59797	8.55444	9.25384	9.0883	9.35251	9.31751	9.1506	9.54371
BP_RS04425	bp0889	accC	accC	acetyl-CoA carboxylase biotin carboxylase subunit	Biotin carboxylase (EC 6.3.4.14) (EC 6.4.1.2)	5	C	0.76508	8.36974	8.43205	8.6265	8.88835	9.06326	9.17091	9.04794	8.86411	9.18939	9.07362	8.96784	8.94372	9.02333	8.7311	8.86141	9.49481	9.40011	9.37682	9.47378	9.47543	9.85225
BP_RS04430	bp0890	_	_	methylmalonyl-CoA carboxyltransferase	_	5	C	0.559439	8.24926	8.29687	8.49037	8.7219	8.81106	8.76224	8.60229	8.55403	8.71292	8.59684	8.61285	8.62989	8.63134	8.14893	8.50054	8.8685	8.91138	8.83514	8.84515	8.80601	9.13848
BP_RS04435	bp0891	_	_	IS481-like element IS481 family transposase	Transposase	_	_	0.234556	5.85376	6.11909	6.00029	5.88206	5.90514	5.93383	6.12142	5.81546	6.10238	5.76647	5.32062	5.8439	6.08051	6.13821	6.19308	6.33369	5.99665	6.32053	5.99807	6.03433	6.58488
BP_RS04440	bp0892	_	_	hypothetical protein	Uncharacterized protein	3	B	0.812282	8.66206	8.76371	8.71214	8.80257	8.95206	8.74072	8.60229	8.57548	8.63629	8.79977	8.68333	8.70986	8.98913	8.98631	8.80917	9.39933	9.48072	9.11232	9.34012	9.5829	9.47655
BP_RS04445	bp0893	_	_	hypothetical protein	Uncharacterized protein	3	B	0.819775	8.00212	8.32611	8.34396	7.96646	8.70076	8.51538	8.05967	8.34659	8.22478	7.46241	7.58446	7.63326	8.12008	8.11621	8.3048	8.68782	8.92825	8.22649	8.93598	9.61011	10.2949
BP_RS04450	bp0894	_	pmi	mannose-6-phosphate isomerase	Putative mannose-6-phosphate isomerase (EC 5.3.1.8)	4	A	0.306252	9.29528	9.31858	9.37799	9.14765	9.21328	9.12682	9.05463	9.00268	9.22518	8.92746	8.99838	8.97077	8.85164	9.0327	8.9445	9.01553	8.96815	9.03709	9.02913	8.98265	9.33282
BP_RS04460	bp0896	_	_	hypothetical protein	Uncharacterized protein	4	A	0.474547	6.30014	5.89256	6.03245	5.43415	4.95721	5.31427	5.14298	4.94111	4.95612	4.4197	4.42331	4.05477	5.29762	5.88441	5.77752	4.62979	5.04109	4.4588	4.70961	4.27432	3.40068
BP_RS04465	bp0897	_	_	IS481-like element IS481 family transposase	Transposase	_	_	0.140308	5.06198	5.16746	5.36754	4.63475	5.00157	4.56399	5.18751	5.09547	5.13494	4.83583	4.86111	4.68801	5.56055	5.07344	5.30739	5.54365	4.95093	4.99703	5.62191	4.81073	5.19032
BP_RS04470	bp0898	_	_	Rieske 2Fe-2S domain-containing protein	Putative ferredoxin	4	A	0.483915	7.02125	6.96205	7.06544	6.16307	5.51136	5.26257	6.21324	5.40894	5.53401	6.05323	5.41193	6.00888	5.43507	5.85652	5.63147	4.6011	4.75161	4.92541	4.70763	4.37704	3.20088
BP_RS04475	bp0899	_	_	ABC transporter ATP-binding protein/permease	ABC transporter, ATP-binding protein	2	B	0.602608	8.75297	8.50526	8.48262	8.63252	8.67483	8.54689	8.51352	8.5765	8.32352	8.07347	8.02177	8.23871	8.45426	8.84727	8.44846	8.63954	8.8188	8.62484	8.40106	8.60818	8.40245
BP_RS04480	bp0900	_	_	aldo/keto reductase	Probable oxidoreductase	3	B	0.921777	8.28711	8.56551	8.55986	8.81676	9.03046	8.96763	8.82419	8.81183	8.85377	8.84814	8.96707	8.75454	9.86719	9.79407	9.73891	9.74853	9.83038	9.69165	10.1574	10.3165	11.1529
BP_RS04485	bp0901	_	_	aldo/keto reductase	Putative oxidoreductase	3	B	0.892215	8.22143	8.13893	8.38614	8.93221	9.02381	8.84578	8.7819	8.91086	8.89243	8.94442	9.00391	9.03628	9.52392	9.43107	9.48881	9.65732	9.5435	9.53353	9.82049	9.87647	10.4626
BP_RS04490	bp0902	_	_	hypothetical protein	Putative membrane protein	5	C	0.583878	3.66844	4.17652	4.29561	5.05319	6.1062	5.40259	5.35303	5.58426	6.08382	5.877	5.69847	5.89072	5.07689	5.1513	5.16683	5.96657	5.35423	5.76451	6.2512	6.63352	6.22413
BP_RS04495	bp0903	_	_	PepSY domain-containing protein	Putative membrane protein	1	B	0.925049	7.34797	6.84199	6.96223	8.33636	8.03322	7.87424	8.79404	9.05536	8.59988	9.08236	9.12707	9.08936	8.76302	8.84715	8.64459	9.08342	9.13103	9.13428	10.3003	10.1026	9.59124
BP_RS04500	bp0904	_	pphA	metallophosphoesterase	Serine/threonine protein phosphatase 1 (EC 3.1.3.16)	11	_	0.506107	8.89207	8.77356	8.76259	8.25872	8.4699	8.45262	8.38052	8.33167	8.34842	8.1787	8.12013	8.10706	8.54119	8.5627	8.64459	8.20785	8.30495	8.42917	8.13697	8.44249	8.55662
BP_RS04505	bp0905	_	mrcA	PBP1A family penicillin-binding protein	Penicillin-binding protein 1A (EC 2.4.1.129) (EC 3.4.16.4)	4	A	0.670186	12.4704	12.4357	12.4245	12.1799	12.1904	12.2061	11.9126	12.0133	11.9365	11.925	11.8485	11.9821	11.7264	11.6564	11.834	11.7904	11.7064	11.9318	11.9946	11.881	12.2513
BP_RS04510	bp0906	_	_	S9 family peptidase	Putative peptidase	2	B	0.91976	11.7821	11.8179	11.8976	12.5422	12.7275	12.6984	12.6516	12.8018	12.818	12.8748	12.7764	12.7978	13.1111	13.0537	13.1522	13.4171	13.2368	13.3805	13.4736	13.5773	13.9835
BP_RS04515	bp0908	_	_	PaaI family thioesterase	4HBT domain-containing protein	9	D	0.811891	9.50389	9.70011	9.67567	9.82621	10.0431	10.091	9.51154	9.82536	9.78035	10.0118	9.67769	9.81597	10.8471	10.7399	10.8648	10.3879	10.2354	10.2442	10.3539	10.2076	10.095
BP_RS04520	bp0909	dinB	dinP, dinB	DNA polymerase IV	DNA polymerase IV (Pol IV) (EC 2.7.7.7)	10	D	0.791817	9.84377	9.7391	9.75515	9.70661	9.66116	9.62886	9.64187	9.59195	9.44733	9.30406	9.42367	9.42585	9.9606	9.82966	9.9855	9.35991	9.41386	9.41432	9.25361	9.05145	9.21989
BP_RS04530	bp0911	_	_	decarboxylase	Putative decarboxylase	3	B	0.539534	5.67152	5.88461	5.5752	6.03817	5.46902	5.21942	5.95247	5.86194	6.00328	5.76899	5.86225	6.09695	6.2891	6.21126	6.00927	6.51405	6.56649	6.55009	6.24029	6.64232	6.79144
BP_RS04535	bp0912	_	_	LysR family transcriptional regulator	_	5	C	0.963222	7.68409	7.76475	7.91127	8.59921	8.58634	8.8279	8.5225	8.69085	8.58085	8.87096	8.83016	8.58371	7.39306	7.40962	7.71133	9.358	9.222	9.46159	9.403	9.51786	9.51584
BP_RS04540	bp0913	_	_	ABC transporter substrate-binding protein	Putative exported protein	2	B	0.975531	7.34709	7.45881	7.44957	8.44321	8.47949	8.38677	8.75545	8.86533	8.88981	8.97764	8.70706	8.88084	7.14516	7.19594	7.21048	10.0736	10.0252	9.84444	10.5913	10.6864	11.3947
BP_RS04545	bp0914	_	_	ABC transporter permease	Probable inner membrane component of binding-protein-dependent transport system	5	C	0.979817	6.92554	7.09682	7.42749	8.05894	8.0328	8.09908	8.51952	8.53924	8.39136	8.71755	8.55469	8.61444	6.87009	6.97707	7.12693	9.73647	9.59279	9.53003	10.0211	10.1467	10.5114
BP_RS04550	bp0915	_	_	ABC transporter permease	Probable inner membrane component of binding-protein-dependent transport system	5	C	0.977771	7.82218	7.83136	7.79918	8.91092	8.65614	8.54506	9.05396	9.02319	8.87676	9.02146	8.99811	8.91968	7.17208	7.06131	7.34649	9.89133	9.82156	9.86934	10.2555	10.2722	10.719
BP_RS04555	bp0916	_	_	ABC transporter ATP-binding protein	_	5	C	0.957584	6.55415	6.57238	6.85853	7.73836	7.82711	7.55986	8.05367	8.17298	8.12608	8.0366	8.13128	8.05315	6.45217	5.88441	6.53284	9.21051	9.02551	8.83223	9.50445	9.49666	9.88825
BP_RS04560	bp0918	_	_	MmgE/PrpD family protein	Uncharacterized protein	3	B	0.875863	7.39607	7.77381	7.82031	8.29906	8.55077	8.63055	8.72781	8.86596	8.84138	9.0313	9.01478	9.02982	9.33267	9.23398	9.34577	9.32603	9.28518	9.32005	9.51232	9.52955	9.74916
BP_RS04565	bp0919	_	gabD	aldehyde dehydrogenase family protein	Putative succinate-semialdehyde dehydrogenase [NADP+] (EC 1.2.1.16)	5	C	0.835824	7.87896	8.19397	8.19366	8.58437	9.06974	8.81549	8.79404	8.72721	8.80349	8.90164	8.70706	8.73586	8.64755	8.55656	8.62619	9.26431	9.15963	9.30851	9.28471	9.64595	10.0679
BP_RS04570	bp0920	tcuA	_	FAD-dependent tricarballylate dehydrogenase TcuA	Putative exported protein	1	B	0.706951	6.45917	6.22694	6.11118	6.73539	6.85101	6.62894	7.04101	6.75989	6.80947	6.9512	6.75562	6.85525	6.90284	6.84809	6.60729	7.35698	7.26498	7.38656	7.31456	7.70496	7.9634
BP_RS04575	bp0921	tcuB	citB	tricarballylate utilization 4Fe-4S protein TcuB	Citrate utilization protein B	2	B	0.556166	7.04494	6.88036	6.87443	6.528	6.23957	6.18682	6.75143	6.4634	6.30247	6.31374	5.99017	6.17996	6.4672	6.56103	6.57545	6.89322	6.85307	7.16551	6.82271	6.92783	7.58662
BP_RS04580	bp0922	_	_	hypothetical protein	Uncharacterized protein	1	B	0.33145	6.46489	6.22858	6.23944	6.47363	6.65557	6.52422	6.49259	6.66767	6.96466	6.80771	6.95389	7.14367	6.85265	7.18346	6.78612	6.84128	7.45053	7.06543	6.83395	7.12362	7.11076
BP_RS04585	bp0923	_	_	phosphosulfolactate synthase	Uncharacterized protein	13	_	0.747178	11.5186	11.3173	11.4113	10.8617	10.6167	10.6641	11.4692	10.5849	10.6095	10.1297	9.97339	10.2113	10.7995	11.0093	10.8127	10.171	10.6431	10.4117	10.0067	10.0766	9.58988
BP_RS04590	bp0924	_	_	TrmB family transcriptional regulator	Putative transcriptional regulator	12	_	0.29422	10.1931	10.1705	10.026	9.91732	10.003	9.92219	9.97482	9.94892	9.86235	9.92974	9.74762	9.78246	10.0208	9.98619	9.9591	10.1247	10.0586	10.0442	10.0316	10.2234	9.8306
BP_RS04595	bp0925	_	_	fumarylacetoacetate hydrolase family protein	Putative fumarylacetoacetate-family hydrolase	_	_	0.116495	6.67684	6.71234	6.31419	5.76678	5.3492	5.93967	6.45455	5.95227	6.20119	5.79674	5.63059	5.61418	6.41895	6.20575	6.53284	6.23906	6.45607	6.02655	5.27608	5.79042	5.99616
BP_RS04600	bp0926	_	_	TauD/TfdA family dioxygenase	TauD domain-containing protein	5	C	0.690572	6.79144	6.62559	6.58677	6.86978	6.26235	6.36559	5.8091	6.20676	6.09239	6.72611	6.76943	6.30553	6.22213	6.31126	6.04986	6.86363	6.87632	6.93745	7.20925	6.881	7.79617
BP_RS04605	bp0927	_	_	tripartite tricarboxylate transporter substrate binding protein	Putative exported protein	5	C	0.856883	7.3334	7.04568	7.1082	7.34384	7.60429	7.68268	7.55888	7.53195	7.66752	7.49747	7.49834	7.64655	7.10453	7.11081	7.18318	8.39812	8.31419	7.95717	8.26351	8.29429	8.79788
BP_RS04610	bp0928	_	_	LysR family transcriptional regulator	LysR-type transcriptional regulator	5	C	0.757371	9.17017	9.34569	9.43423	10.0475	10.0956	10.0987	9.68357	9.92434	9.86248	9.81553	9.83254	9.7513	9.42144	9.40662	9.3392	9.94772	9.82236	9.7278	9.68542	9.93594	10.0466
BP_RS04615	bp0929	_	_	restriction endonuclease	Putative membrane protein	4	A	0.627655	9.30472	8.99838	9.08953	8.70987	7.96709	7.79561	7.99225	7.98645	8.05309	8.13987	8.52829	8.05698	7.59992	7.6381	7.67559	7.50613	7.528	7.52594	7.28991	7.45617	6.52957
BP_RS04620	bp0930	_	_	AMP-binding protein	Putative CoA ligase	_	_	0.231063	6.50676	6.07579	5.90985	6.31853	5.72005	5.66518	6.25386	5.86194	5.73468	5.3537	5.69847	5.79618	5.57858	6.13828	5.63541	6.14588	6.19296	6.42742	6.186	5.96079	6.34372
BP_RS04625	bp0931	_	_	tripartite tricarboxylate transporter substrate binding protein	Putative exported protein	5	C	0.462754	5.51109	5.1947	4.93379	5.47516	4.97666	5.269	5.39821	5.52542	5.3296	5.59424	5.13313	4.61592	4.46301	4.78115	4.27653	5.81993	6.14639	6.04356	5.8354	5.91495	6.14905
BP_RS04630	bp0932	_	_	OB-fold domain-containing protein	Uncharacterized protein	5	C	0.615653	4.38477	4.92875	4.65054	4.59463	4.57587	3.92916	3.88009	4.84813	4.82531	5.31191	5.06011	4.27616	3.8718	4.90863	3.59721	5.77523	5.47598	5.72287	5.86347	5.63124	5.95927
BP_RS04635	bp0933	_	_	thiolase domain-containing protein	_	5	C	0.538462	5.5521	5.74454	5.71195	5.26936	5.31447	4.78548	5.49894	5.08557	5.5987	5.50382	5.33971	5.16231	4.213	4.90863	4.46842	6.18852	5.78448	5.6358	5.75563	5.85758	6.70651
BP_RS04640	bp0934	_	_	hypothetical protein	Uncharacterized protein	2	B	0.255795	5.19466	4.88789	4.34207	4.30629	4.62217	4.23654	4.30949	3.85019	4.63257	4.60832	4.80857	4.43613	4.53757	4.51902	4.10782	5.56268	5.95085	5.30314	5.20755	4.84556	6.14905
BP_RS04645	bp0935	_	_	tripartite tricarboxylate transporter substrate binding protein	Putative exported protein	2	B	0.449288	6.74137	6.83335	6.55754	6.36683	6.11993	6.43719	6.381	6.08979	6.46648	6.24146	5.69847	6.08318	5.93106	6.26203	6.50393	6.9141	6.9553	6.66018	6.46784	6.4582	6.4375
BP_RS04650	bp0936	_	_	LysR family transcriptional regulator	LysR-family transcriptional regulator	4	A	0.575818	7.77306	7.7602	7.86031	7.61297	7.61554	7.56105	7.20159	7.50585	7.28975	7.2208	7.17426	7.22729	7.03054	7.16521	6.9652	7.30852	7.53476	7.44436	7.07163	6.88003	6.77503
BP_RS04655	bp0937	_	_	type II toxin-antitoxin system HicB family antitoxin	Phage-related protein	1	B	0.899879	10.3021	10.6815	10.8466	11.7781	12.1021	12.1343	12.1614	12.1107	12.2125	12.3496	12.2983	12.2632	11.8311	11.9832	12.0083	12.7687	12.5965	12.7196	12.7718	12.7839	13.0141
BP_RS04665	bp0939	_	_	type II toxin-antitoxin system HicA family toxin	Uncharacterized protein	12	_	0.882485	5.71843	5.52662	5.3734	4.55337	5.11573	4.93457	4.15167	4.19036	4.60214	4.61835	4.74895	4.68801	6.96565	6.88201	7.03269	6.35051	6.33248	5.93833	5.8709	6.01669	5.43362
BP_RS04675	bp0940	_	_	MFS transporter	Putative sugar efflux transpoter	4	A	0.350656	8.13931	7.74646	7.7981	6.6208	6.34033	6.60716	6.29514	6.61278	6.3548	6.39832	6.26442	6.35598	6.56029	6.96752	6.82172	6.50824	6.22133	6.2916	6.11771	5.79042	6.05662
BP_RS04680	bp0941	_	_	HAD-IA family hydrolase	Putative phosphoglycolate phosphatase (EC 3.1.3.18)	10	D	0.92485	10.8997	10.898	10.8807	10.6761	10.711	10.7189	10.4379	10.6418	10.712	10.7428	10.6425	10.7008	11.3534	11.2914	11.277	10.6863	10.6799	10.8155	10.7575	10.7821	10.759
BP_RS04685	bp0942	_	ubiG	bifunctional 3-demethylubiquinone 3-O-methyltransferase/2-octaprenyl-6-hydroxy phenol methylase	Ubiquinone biosynthesis O-methyltransferase (2-polyprenyl-6-hydroxyphenol methylase) (EC 2.1.1.222) (3-demethylubiquinone 3-O-methyltransferase) (EC 2.1.1.64)	10	D	0.870239	11.6389	11.4992	11.4715	11.0058	10.7224	10.7295	10.6098	10.6483	10.6938	10.6483	10.616	10.6594	11.0546	11.0961	11.1137	10.3841	10.364	10.6151	10.4429	10.3805	10.4248
BP_RS04690	bp0943	_	ompA	OmpA family protein	Outer membrane protein A	10	D	0.799933	13.7446	14.1641	14.1283	14.1952	14.6475	14.4863	14.2695	14.4249	14.4648	14.6749	14.5869	14.4626	15.3099	14.8355	15.0301	14.3649	14.1418	14.2209	14.2823	14.0506	14.1917
BP_RS04695	bp0944	gyrA	gyrA	DNA gyrase subunit A	DNA gyrase subunit A (EC 5.6.2.2)	7	A	0.82093	13.8481	13.931	13.9159	13.8684	13.7052	13.6872	13.9541	14.0202	13.9619	14.0594	13.9731	13.9958	13.7135	13.5	13.6252	13.262	13.093	13.3457	13.2974	12.852	12.0863
BP_RS04700	bp0945	serC	serC	3-phosphoserine/phosphohydroxythreonine transaminase	Phosphoserine aminotransferase (EC 2.6.1.52) (Phosphohydroxythreonine aminotransferase) (PSAT)	4	A	0.931029	12.1616	12.2968	12.3495	12.3155	12.228	12.1138	12.1419	12.2452	12.1831	12.3706	12.2824	12.2795	12.0638	11.8666	11.976	11.4566	11.4299	11.6282	11.6683	11.3464	11.3113
BP_RS04705	bp0946	pheA	pheA	prephenate dehydratase	Bifunctional chorismate mutase/prephenate dehydratase (EC 4.2.1.51) (EC 5.4.99.5) (Chorismate mutase-prephenate dehydratase) (p-protein)	7	A	0.920435	11.8673	11.9428	12.0577	12.0677	12.0071	11.9332	11.915	11.9457	11.9625	12.1334	12.1312	12.0471	11.6937	11.4852	11.741	11.1815	11.0992	11.3867	11.3974	11.2451	11.1167
BP_RS04710	bp0947	_	tyrA	prephenate dehydrogenase/arogenate dehydrogenase family protein	Prephenate dehydrogenase (EC 1.3.1.12)	4	A	0.918178	10.4875	10.4905	10.5433	10.4584	10.4069	10.336	10.2576	10.178	10.1859	10.1574	10.3514	10.2409	9.85158	9.72785	9.88158	9.2306	9.49049	9.54403	9.40032	9.49461	9.28817
BP_RS04715	bp0948	aroA	aroA	3-phosphoshikimate 1-carboxyvinyltransferase	3-phosphoshikimate 1-carboxyvinyltransferase (EC 2.5.1.19) (5-enolpyruvylshikimate-3-phosphate synthase) (EPSP synthase) (EPSPS)	7	A	0.93037	11.4309	11.4548	11.6346	11.3715	11.3508	11.3035	11.2228	11.2807	11.239	11.3328	11.3465	11.3125	11.0082	10.9742	11.0833	10.7417	10.6023	10.7848	10.6679	10.6964	10.7555
BP_RS04720	bp0949	_	cmk	(d)CMP kinase	Cytidylate kinase (CK) (EC 2.7.4.25) (Cytidine monophosphate kinase) (CMP kinase)	4	A	0.817371	11.8715	11.7386	11.6894	11.0379	10.1892	10.0956	10.7859	10.2644	10.3602	10.2827	10.3241	10.2979	10.1512	10.161	10.2116	9.4574	9.3897	9.668	9.55704	9.13393	8.88832
BP_RS04725	bp0950	rpsA	rpsA	30S ribosomal protein S1	30S ribosomal protein S1	4	A	0.789724	15.8746	15.9761	15.9544	14.889	14.9398	14.9116	14.8553	15.0683	15.0277	15.3355	15.1961	15.1279	14.6729	14.4396	14.5642	14.2227	14.1538	14.4022	14.2965	13.7469	12.7538
BP_RS04730	bp0951	_	ihfB	integration host factor subunit beta	Integration host factor subunit beta	4	A	0.886586	10.0479	10.4206	10.3375	9.28178	9.6072	9.62906	9.78563	9.78472	9.65975	9.53036	9.55838	9.47627	8.32267	8.02126	8.44846	8.11663	8.45171	8.63845	8.2169	8.04156	6.95183
BP_RS04735	bp0952	_	_	DUF1049 domain-containing protein	Putative membrane protein	10	D	0.4872	9.8144	9.67394	9.76222	9.27124	9.74559	9.69105	9.57925	9.51223	9.54777	9.69857	9.61023	9.64002	9.76686	9.79022	9.91309	9.52667	9.30948	9.36921	9.62814	9.51299	9.27109
BP_RS04740	bp0953	lapB	lapB	lipopolysaccharide assembly protein LapB	Lipopolysaccharide assembly protein B	4	A	0.856437	11.3922	11.291	11.2975	10.8579	10.9459	10.8151	10.8383	10.8746	10.7987	10.7741	10.6832	10.7472	11.0164	10.8542	10.9144	10.5291	10.4747	10.5865	10.4364	10.2795	10.0679
BP_RS04745	bp0954	rfaE1	rfaE	D-glycero-beta-D-manno-heptose-7-phosphate kinase	ADP-heptose synthase (EC 2.7.-.-)	4	A	0.771126	11.2946	11.2756	11.157	11.0608	11.0424	10.8739	10.8515	10.87	10.8815	10.9669	10.8646	10.9395	11.121	11.0554	11.1069	10.6498	10.5128	10.6166	10.8489	10.6534	10.566
BP_RS04750	bp0955	rfaD	hldD, htrM, rfaD	ADP-glyceromanno-heptose 6-epimerase	ADP-L-glycero-D-manno-heptose-6-epimerase (EC 5.1.3.20) (ADP-L-glycero-beta-D-manno-heptose-6-epimerase) (ADP-glyceromanno-heptose 6-epimerase) (ADP-hep 6-epimerase) (AGME)	10	D	0.646167	11.6171	11.6745	11.6103	11.6102	11.6737	11.5636	11.4373	11.5343	11.5155	11.5959	11.4893	11.4971	11.8389	11.6244	11.7008	11.3666	11.2139	11.345	11.4325	11.5502	11.829
BP_RS04755	bp0956	_	_	helix-hairpin-helix domain-containing protein	Uncharacterized protein	7	A	0.459723	6.81176	6.74946	6.82048	6.64802	6.68831	6.89161	6.82628	6.43861	6.60723	6.01997	6.4383	6.40882	6.12954	6.21126	6.22019	5.98643	5.64052	5.74456	5.65629	6.01123	5.36137
BP_RS04765	bp0958	cysM	cysM	cysteine synthase CysM	Cysteine synthase (EC 2.5.1.47)	5	C	0.819421	11.4943	11.3281	11.3955	11.5624	11.3892	11.4003	11.5893	11.4526	11.4401	11.4876	11.5375	11.4757	11.0715	10.9933	10.9782	11.418	11.3546	11.4148	11.4311	11.3276	11.5718
BP_RS04770	bp0959	mltB	mltB	lytic murein transglycosylase B	Membrane-bound lytic murein transglycosylase B (EC 3.2.1.-)	6	_	0.46443	9.62384	9.6692	9.65691	10.0923	9.96149	9.96633	9.75821	9.77311	9.84617	9.83975	9.79919	9.85753	10.0761	9.90076	9.79352	9.9404	9.91993	10.092	9.88168	9.57992	9.44058
BP_RS04775	bp0960	_	_	histone deacetylase family protein	Histone deacetylase family protein	5	C	0.8414	8.82416	8.80348	9.06459	9.45807	9.65162	9.84034	9.87754	9.57406	9.6868	9.41627	9.37794	9.47245	8.90613	9.01717	9.09014	9.80377	9.79118	9.85597	9.76152	9.82582	10.1372
BP_RS04780	bp0961	_	etfB	electron transfer flavoprotein subunit beta/FixA family protein	Electron transfer flavoprotein beta-subunit	1	B	0.874545	13.6953	13.6015	13.6908	14.255	14.5074	14.3368	14.4875	14.4448	14.4422	14.6854	14.5465	14.5704	14.9561	14.8665	14.9563	14.6746	14.5047	14.5351	14.9301	14.8908	15.2155
BP_RS04785	bp0962	_	etfA	FAD-binding protein	Electron transfer flavoprotein alpha-subunit	9	D	0.887616	12.2766	12.4752	12.4864	12.9966	13.1041	12.9929	13.1296	13.1626	13.2856	13.5083	13.3752	13.3391	13.9857	13.6861	13.7993	13.3847	13.3539	13.4032	13.6048	13.6921	13.9852
BP_RS04790	bp0964	_	_	acyl-CoA dehydrogenase	Probable acyl-CoA dehydrogenase	5	C	0.941562	11.6162	11.5906	11.6286	11.4263	11.1879	11.1562	11.2931	11.1951	11.139	11.1562	11.075	11.0837	10.6364	10.7872	10.6942	11.562	11.64	11.6205	11.7098	11.8446	12.0358
BP_RS04795	bp0965	_	_	peroxiredoxin	Alkyl hydroperoxide reductase C (Peroxiredoxin) (Thioredoxin peroxidase)	3	B	0.923477	11.1766	11.4017	11.481	11.999	12.4264	12.2914	12.5711	12.679	12.6636	12.7955	12.6103	12.5258	12.9781	12.8066	12.9472	13.5479	13.2531	13.3325	13.6392	13.7383	14.324
BP_RS04800	bp0966	_	sbp	sulfate ABC transporter substrate-binding protein	Sulfate-binding protein	3	B	0.984476	5.9465	5.55151	5.94081	5.4567	5.25853	5.35404	7.76136	7.85475	7.82375	7.93454	7.81701	7.88497	9.77437	9.70652	9.87983	9.35195	9.15193	9.24786	8.253	8.17401	7.8484
BP_RS04805	bp0967	cysT	_	sulfate ABC transporter permease subunit CysT	_	1	B	0.903335	3.08345	3.20157	3.41151	3.30098	3.23544	3.97773	5.87264	5.32002	5.72444	5.53029	5.5139	6.00079	7.67616	7.13975	7.51631	6.8071	6.93914	7.03258	5.63035	5.29124	5.01851
BP_RS04810	bp0968	cysW	_	sulfate ABC transporter permease subunit CysW	_	9	D	0.903978	3.55491	2.53184	3.77199	3.33039	2.81003	3.04467	4.30352	4.88653	4.57026	4.9895	5.35537	5.04387	6.73019	6.6362	6.72476	6.22445	5.97393	5.87587	5.11518	4.80958	4.95648
BP_RS04815	bp0969	_	cysA	sulfate ABC transporter ATP-binding protein	Sulfate/thiosulfate import ATP-binding protein CysA (EC 7.3.2.3) (Sulfate-transporting ATPase)	9	D	0.748584	3.55765	3.2049	3.32162	1.89439	2.76957	3.29547	4.74289	4.88653	4.78141	4.32936	4.13995	4.30863	5.99417	6.04154	5.71006	5.74967	5.64052	5.33775	5.65441	4.75621	5.56801
BP_RS04820	bp0970	_	_	phosphoadenylyl-sulfate reductase	_	6	_	0.784687	3.68793	3.02713	3.85767	3.30098	3.83072	3.29339	5.17282	5.07022	5.13229	4.47536	5.15052	5.04387	6.35243	5.98022	6.19308	5.60035	5.72458	6.12389	5.55463	4.53693	5.28532
BP_RS04825	bp0970A	cysD	cysD	sulfate adenylyltransferase subunit CysD	ATP-sulfurylase small subunit (EC 2.7.7.4) (Sulfate adenylate transferase) (Sulfate adenylyltransferase subunit 2)	1	B	0.925027	4.0411	4.79274	4.5932	5.07089	4.41729	4.50293	6.37532	6.52478	6.36268	6.81392	6.37695	6.14202	8.13502	8.21887	8.06843	7.34934	7.60089	7.70676	6.94525	6.5965	7.33021
BP_RS04830	bp0971	_	_	sulfate adenylyltransferase	_	9	D	0.719402	5.23173	4.86235	5.13871	5.56071	5.24237	5.6293	4.61077	5.85606	5.90043	5.31562	5.83525	5.77303	7.36421	6.99998	7.14125	6.46817	6.45607	6.88399	6.05768	5.78363	6.11464
BP_RS04835	bp0972	_	_	PA0069 family radical SAM protein	Elp3 domain-containing protein	10	D	0.900049	11.0614	10.8624	10.9158	10.3053	10.2121	10.4129	10.3781	10.1176	10.0453	9.83929	9.86908	9.99023	10.9675	11.3591	11.3848	10.3548	10.2975	10.7228	10.027	9.95574	10.3435
BP_RS04840	bp0973	_	_	hypothetical protein	Putative membrane protein	9	D	0.913494	8.0632	8.30066	8.4923	8.21979	8.45777	8.43401	8.04045	8.19204	7.90224	8.14642	8.21965	8.05888	9.96494	9.75098	9.69579	8.57882	8.55302	8.61588	8.43162	8.43782	8.86654
BP_RS04845	bp0974	_	_	EamA family transporter	Putative membrane protein	12	_	0.919072	9.56724	9.62369	9.64763	9.41983	9.25719	8.92782	9.22949	8.93929	9.06569	8.83953	8.8539	8.88192	10.4775	10.5572	10.5017	9.73924	9.9537	9.50043	9.46843	9.71477	9.27774
BP_RS04850	bp0975	rplS	rplS	50S ribosomal protein L19	50S ribosomal protein L19	7	A	0.757998	12.0941	12.3035	12.2913	11.8039	11.6991	11.95	11.618	11.8856	12.071	12.3965	12.4986	12.4753	11.8325	11.7343	11.9177	11.1886	11.2045	11.2274	11.479	11.0063	9.8818
BP_RS04855	bp0976	_	_	CoA pyrophosphatase	Nudix hydrolase domain-containing protein	4	A	0.838308	10.6659	10.3397	10.2313	9.9653	9.70239	9.63573	9.44736	9.66258	9.50079	9.58953	9.47548	9.5218	9.24189	9.31656	9.31319	8.99763	9.01897	8.9222	8.94048	8.98611	8.98432
BP_RS04860	bp0977	_	_	NADP(H)-dependent aldo-keto reductase	Probable oxidoreductase	3	B	0.783188	10.1749	10.172	10.0999	10.0149	10.1183	10.0967	10.1738	10.1248	10.0952	10.2133	10.1753	10.1835	10.4869	10.3904	10.4338	10.372	10.0834	10.2258	10.5379	10.5188	10.5807
BP_RS04865	bp0978	_	_	IS110-like element IS1663 family transposase	Transposase for IS1663 (Fragment)	_	_	0.00222032	3.80051	3.8744	3.74922	2.3469	3.28223	0	2.70879	2.70743	3.50442	2.92501	3.09609	3.06181	0	3.466	3.22137	0	2.06471	3.58882	2.45626	3.86124	2.96889
BP_RS04870	bp0980	_	_	MFS transporter	_	_	_	0.240694	7.72395	7.67827	7.45334	7.61297	7.52195	7.73915	7.55888	7.39895	7.35628	7.38002	7.53922	7.54375	7.95347	7.95238	7.74908	7.62863	7.71774	7.57928	7.46884	7.62623	7.54502
BP_RS04875	bp0981	_	ubiC	chorismate lyase	Probable chorismate pyruvate-lyase (CL) (CPL) (EC 4.1.3.40)	4	A	0.750787	8.00886	8.15636	8.12988	8.05757	8.0801	8.07868	7.75398	7.94057	8.01815	7.8104	7.77609	7.99448	7.85492	7.9494	7.91208	7.69867	7.61132	7.54237	7.21334	7.25724	7.10932
BP_RS04880	bp0982	_	_	rRNA pseudouridine synthase	Putative RNA pseudouridylate synthase	7	A	0.838905	10.2604	10.1494	10.1167	9.76639	9.6894	9.70909	9.57133	9.68455	9.64567	9.55781	9.46451	9.56316	9.43658	9.44158	9.5205	9.02995	9.05189	9.17987	9.17721	9.01602	8.5252
BP_RS04885	bp0983	_	_	LysR family transcriptional regulator	LysR-family transcriptional regulator	7	A	0.627424	11.661	11.5456	11.5429	11.2742	10.8515	10.8507	11.0147	11.0167	10.8932	11.124	11.0774	11.1405	11.0183	11.0217	10.9674	10.6231	10.5947	10.788	10.7226	10.2318	9.25308
BP_RS04890	bp0984	_	_	biotin/lipoyl-binding protein	_	10	D	0.875637	9.85086	9.73768	9.73135	9.51354	9.32439	9.10999	8.98628	9.15438	9.29272	9.40221	9.36181	9.40197	10.4781	10.0943	10.2797	9.02905	8.98923	9.20028	9.17738	8.96472	8.50652
BP_RS04895	bp0985	_	acrB	efflux RND transporter permease subunit	Efflux pump membrane transporter	4	A	0.947188	11.9229	11.7924	11.7337	11.103	10.9269	10.9656	10.8678	10.8401	10.886	10.7428	10.7237	10.6819	11.7313	11.5872	11.6343	10.6369	10.6153	10.6758	10.7617	10.7724	11.0003
BP_RS04900	bp0986	_	cusC	efflux transporter outer membrane subunit	Probable outer membrane lipoprotein	10	D	0.79149	9.51062	9.62106	9.5391	9.12943	9.24536	9.35663	9.11685	9.1414	9.07036	8.93982	9.25124	9.03362	9.73761	9.56613	9.68384	9.0034	8.83933	8.95593	8.89086	8.98336	9.35842
BP_RS04905	bp0987	_	_	GlsB/YeaQ/YmgE family stress response membrane protein	Putative membrane protein	9	D	0.778889	8.4719	8.68292	8.722	8.46986	9.25281	9.19545	9.23937	9.11699	9.2382	9.24729	9.12707	9.08205	10.1338	9.85496	9.97207	9.45372	9.20703	9.14745	9.4756	9.56369	9.90914
BP_RS04910	bp0988	_	_	SCO family protein	Putative exported protein	9	D	0.426144	10.2733	10.3928	10.4441	10.5501	10.502	10.4548	10.2663	10.3528	10.4798	10.6807	10.5424	10.695	10.9633	10.8247	10.7831	10.6018	10.5034	10.4584	10.8577	10.5358	9.92898
BP_RS04915	bp0989	_	prlC	M3 family metallopeptidase	Oligopeptidase A (EC 3.4.24.70)	5	C	0.920627	10.5994	10.7301	10.7484	10.8385	10.7628	10.8146	11.2844	11.3376	11.3815	11.5747	11.455	11.4825	10.6864	10.6214	10.7738	11.663	11.5139	11.7047	11.4663	11.5563	12.0304
BP_RS04920	bp0990	folD	folD1	bifunctional methylenetetrahydrofolate dehydrogenase/methenyltetrahydrofolate cyclohydrolase FolD	Bifunctional protein FolD 1 [Includes: Methylenetetrahydrofolate dehydrogenase (EC 1.5.1.5); Methenyltetrahydrofolate cyclohydrolase (EC 3.5.4.9)]	6	_	0.712823	10.856	10.9666	11.0636	11.5089	11.2161	11.2509	11.3201	11.4583	11.4913	11.5394	11.5481	11.5226	11.0739	10.9888	11.0584	11.1033	11.0854	11.3228	11.139	10.9693	10.8799
BP_RS04925	bp0991	_	_	response regulator transcription factor	Two-component response regulator	5	C	0.677352	10.9078	11.0568	11.0237	11.7177	11.6313	11.6104	11.6779	11.7465	11.7832	11.988	11.7704	11.8764	11.7064	11.6106	11.668	11.8888	11.6607	11.7898	12.0037	11.9348	12.2618
BP_RS04930	bp0992	_	_	PAS domain S-box protein	Histidine kinase (EC 2.7.13.3)	7	A	0.745499	11.2052	11.0321	11.0963	11.5124	11.1088	11.2246	11.6826	11.3422	11.3385	11.1698	11.1581	11.2283	10.8307	10.9941	10.9175	11.1676	10.9766	11.2795	11.0531	10.8044	10.7954
BP_RS04935	bp0993	aceE	aceE	pyruvate dehydrogenase (acetyl-transferring)%2C homodimeric type	Pyruvate dehydrogenase E1 component (EC 1.2.4.1)	5	C	0.830753	13.9924	13.9829	13.9578	14.5815	14.4139	14.2895	14.1699	14.3028	14.3997	14.569	14.3683	14.412	13.8538	13.8031	13.8163	14.3223	14.1642	14.4086	14.6109	14.444	14.8296
BP_RS04940	bp0994	aceF	aceF	dihydrolipoyllysine-residue acetyltransferase	Acetyltransferase component of pyruvate dehydrogenase complex (EC 2.3.1.12)	5	C	0.764041	12.205	12.2846	12.4552	12.4681	12.6072	12.4958	12.5053	12.6026	12.6827	12.7743	12.6862	12.661	12.3669	12.1235	12.2284	12.5521	12.4065	12.6527	12.7438	12.7259	13.0641
BP_RS04945	bp0995	lpdA	lpdA	dihydrolipoyl dehydrogenase	Dihydrolipoyl dehydrogenase (EC 1.8.1.4)	5	C	0.740935	11.6814	11.8387	12.0069	12.0434	12.2742	12.2679	12.2727	12.2858	12.2925	12.3675	12.351	12.2365	11.9898	11.8004	11.8978	12.0394	11.9521	12.2264	12.3785	12.2515	12.5825
BP_RS04950	bp0996	_	flaA	FliC/FljB family flagellin	Flagellin	_	_	0.225917	7.60456	7.93596	7.9342	7.97939	8.12929	8.06223	8.19858	8.32602	8.25996	8.21084	8.26882	8.03637	8.41204	8.30891	8.27943	8.278	8.19086	8.17337	8.20466	8.35513	8.9201
BP_RS04960	bp0998	_	_	16S rRNA (uracil(1498)-N(3))-methyltransferase	Ribosomal RNA small subunit methyltransferase E (EC 2.1.1.193)	4	A	0.770701	8.15042	8.42719	8.35638	8.50523	8.38069	8.64537	8.50864	8.44713	8.47061	8.45188	8.74204	8.66375	8.05315	7.84236	8.129	7.9491	7.9796	7.99243	7.86347	7.77025	6.93737
BP_RS04965	bp0999	tkt	tktA	transketolase	Transketolase (EC 2.2.1.1)	4	A	0.874112	13.1946	13.2788	13.375	13.1819	13.1336	13.059	13.0874	13.1177	13.0544	13.1846	13.106	13.1009	13.3482	13.2319	13.4096	12.4247	12.407	12.5836	12.4555	12.1825	11.4621
BP_RS04970	bp1000	gap	gap	type I glyceraldehyde-3-phosphate dehydrogenase	Glyceraldehyde-3-phosphate dehydrogenase (EC 1.2.1.-)	10	D	0.94905	12.7277	13.0157	13.0523	13.1083	13.5457	13.4609	13.1104	13.3831	13.3602	13.5829	13.4103	13.3397	14.5087	14.348	14.4651	12.7814	12.726	12.8469	13.0777	12.7752	12.5141
BP_RS04975	bp1001	_	pgk	phosphoglycerate kinase	Phosphoglycerate kinase (EC 2.7.2.3)	10	D	0.938373	10.3336	10.4832	10.5781	10.4423	10.5093	10.5154	10.2928	10.3177	10.3156	10.3115	10.4278	10.4365	10.8729	10.642	10.8483	9.52667	9.54735	9.81112	9.8836	9.64687	9.29424
BP_RS04980	bp1002	fabI	fabI	enoyl-ACP reductase FabI	Enoyl-[acyl-carrier-protein] reductase [NADH] (EC 1.3.1.9)	10	D	0.964665	9.04099	9.11084	8.93884	8.43577	8.39971	8.53978	8.40087	8.57548	8.48761	8.41453	8.27953	8.37169	9.96568	9.78036	9.87327	7.41828	7.48603	7.48718	7.81962	7.80843	7.8654
BP_RS04985	bp1003	_	ackA	acetate kinase	Acetate kinase (EC 2.7.2.1) (Acetokinase)	9	D	0.986714	9.61917	9.2968	9.21329	8.99931	9.07641	9.16894	9.34563	9.29955	9.24701	9.3134	9.19658	9.353	11.214	11.1638	11.1634	8.62067	8.6207	8.52188	9.21288	9.34438	9.58355
BP_RS04990	bp1004	_	_	phosphate acetyltransferase	Phosphate acetyl/butaryl transferase (EC 2.3.1.19)	10	D	0.978748	10.458	10.0027	9.83927	9.94051	9.71701	9.62926	9.72211	9.72834	9.75754	9.82266	9.81549	9.84283	11.628	11.5154	11.6019	8.71069	8.65764	8.9286	9.37764	9.19498	9.03377
BP_RS04995	bp1005	_	_	DUF3141 domain-containing protein	Uncharacterized protein	10	D	0.966112	12.3863	11.7884	11.6424	12.7786	12.2868	12.236	11.7802	11.8207	11.9286	11.7663	11.6644	11.7747	13.708	13.6071	13.6738	11.051	10.8591	10.9873	11.4508	11.4232	12.1267
BP_RS05000	bp1006	yfcF	_	glutathione transferase	Probable glutathione S-transferase	1	B	0.521781	7.34449	7.50922	7.42593	8.04278	8.29135	8.43847	8.20499	8.04805	8.12937	7.82714	7.87702	7.78947	8.2274	8.25413	8.39815	8.41783	8.20429	8.4375	8.14576	8.45778	8.58799
BP_RS05015	bp1009	_	_	DinB family protein	Uncharacterized protein	7	A	0.565429	9.15198	9.23925	9.14614	9.82608	9.25151	9.35982	9.55443	9.33411	9.36283	9.39723	9.44677	9.54505	9.18572	9.32998	9.32956	9.45027	9.37783	9.62301	9.01519	9.00522	8.51984
BP_RS05020	bp1010	_	_	GNAT family N-acetyltransferase	Putative acetyltransferase	6	_	0.48057	8.4774	8.29125	8.24656	8.98819	8.35802	8.46907	8.58973	8.11431	8.31205	8.57571	8.71379	8.67885	8.80302	8.91488	8.81801	8.86544	8.78777	8.96331	8.72788	8.25743	7.22766
BP_RS05025	bp1011	_	cbpA	DnaJ domain-containing protein	Curved DNA-binding protein	9	D	0.946897	7.02669	7.60949	7.516	8.90453	9.20308	9.21193	9.16475	9.29653	9.36146	9.67102	9.62574	9.70923	9.76626	9.48035	9.58319	10.4603	10.3099	10.3089	10.3206	10.4863	10.7709
BP_RS05030	bp1012	_	_	MerR family transcriptional regulator	Uncharacterized protein	1	B	0.861344	5.45131	5.60972	6.17673	7.24954	7.51065	7.21609	7.70887	7.8098	7.71556	8.0763	7.85636	7.87655	8.12997	8.04214	8.19145	8.82741	8.72262	8.7695	8.78595	8.59307	9.31007
BP_RS05035	bp1013	_	_	AzlC family ABC transporter permease	_	4	A	0.644653	8.49868	8.45224	8.50897	8.17506	8.38398	8.49715	8.66673	8.64322	8.49396	8.34101	8.57326	8.574	7.95307	7.96175	8.05564	8.21116	8.18686	8.24774	7.95515	7.75537	7.76026
BP_RS05040	bp1014	_	pitA	inorganic phosphate transporter	Phosphate transporter	7	A	0.84687	12.3856	12.2554	12.1897	11.529	10.9126	10.9822	10.928	11.0583	10.9442	11.2463	11.2	11.2842	10.8913	10.8064	10.831	10.153	10.0854	10.3402	10.1417	9.79611	8.82803
BP_RS05045	bp1015	mog	mog	molybdopterin adenylyltransferase	Molybdopterin biosynthesis protein	12	_	0.595067	9.01499	8.94737	9.04348	8.78039	8.962	8.92785	8.82419	8.83716	8.74934	8.64801	8.93518	8.69356	9.20301	9.05483	9.26206	8.99055	8.6831	8.84666	8.85916	8.95276	9.09179
BP_RS05050	bp1016	_	_	hypothetical protein	Putative exported protein	10	D	0.36507	9.05404	9.08452	9.11688	8.9766	8.95206	9.18833	8.63883	8.86114	8.93445	8.81694	8.97018	8.98349	9.15423	9.07697	9.17069	8.92508	8.88535	8.63719	8.88321	8.99153	8.41405
BP_RS05055	bp1017	_	_	M23 family metallopeptidase	Putative peptidase	4	A	0.73292	9.76962	9.73794	9.70936	9.50469	9.42085	9.52516	9.19679	9.42398	9.37256	9.28225	9.33407	9.31727	9.39538	9.33845	9.2941	8.90097	8.89432	8.91759	9.0011	8.80482	8.0699
BP_RS05060	bp1018	_	_	hypothetical protein	Uncharacterized protein	13	_	0.43034	7.94207	7.74392	7.77874	7.79403	7.6813	8.03474	8.07349	8.15369	7.93932	7.55096	7.53497	7.65972	8.0232	8.1864	8.205	7.74866	7.83581	7.84979	7.05659	7.23039	8.11324
BP_RS05065	bp1019	infA	infA1	translation initiation factor IF-1	Translation initiation factor IF-1 1	1	B	0.752885	7.07006	7.7791	7.77932	8.8502	9.02714	8.89652	8.5667	8.86411	8.92946	8.86931	8.91357	8.65441	9.29252	9.10785	9.14257	9.33863	9.43087	9.21659	9.24467	9.37528	9.54094
BP_RS05075	bp1021	_	fliA	RNA polymerase sigma factor FliA	RNA polymerase sigma factor FliA (RNA polymerase sigma factor for flagellar operon) (Sigma F) (Sigma-28)	4	A	0.67098	8.09617	8.19059	8.14169	7.72222	7.42432	7.73187	7.37232	7.68092	7.68286	7.47366	7.98538	7.61811	7.86171	7.91962	7.50817	7.22112	7.52211	7.3659	6.95574	7.14001	6.26073
BP_RS05080	bp1022	flhD	flhD, frlA	flagellar transcriptional regulator FlhD	Flagellar transcriptional regulator FlhD	9	D	0.467023	5.28738	5.89256	5.70995	5.90777	6.30686	6.09942	5.97952	6.12984	6.46217	6.34001	6.51713	6.17996	6.76305	6.46121	6.37613	6.65866	6.60379	6.47837	5.37126	6.29411	5.43362
BP_RS05085	bp1023	flhC	flhC	flagellar transcriptional regulator FlhC	Flagellar transcriptional regulator FlhC	_	_	0.149537	4.88562	5.1947	4.73921	4.94926	5.25853	3.93802	4.80468	5.22616	5.17062	5.88742	5.41193	5.7868	4.88279	4.91824	5.40449	4.83332	4.9967	5.09155	4.85111	4.75621	4.95648
BP_RS05090	bp1024	motA	motA	flagellar motor stator protein MotA	Chemotaxis protein MotA	_	_	0.0396079	5.44471	5.54785	5.75344	5.86413	5.74387	5.48839	6.05773	5.74763	5.90448	5.7412	5.6693	4.83609	5.83348	6.14994	5.68467	5.98913	6.0732	5.65806	5.24222	5.6715	5.63074
BP_RS05095	bp1025	motB	motB	flagellar motor protein MotB	Chemotaxis protein MotB	_	_	0.0232779	5.45295	5.41681	5.36754	5.53275	5.62912	5.29814	5.35178	5.77315	5.62842	5.69793	5.15052	5.27176	5.36798	5.68389	5.30739	5.45812	5.29285	5.33775	5.24222	5.33322	5.35686
BP_RS05100	bp1026	_	_	response regulator	_	_	_	0.0126476	3.39519	3.22402	4.34207	4.27746	3.54452	3.60731	4.46531	3.85019	3.39599	3.44768	4.10272	4.23989	4.82166	4.7324	4.62014	4.70784	3.66366	3.72731	4.39943	3.95303	4.81402
BP_RS05105	bp1028	cheA	cheA	chemotaxis protein CheA	Chemotaxis protein CheA (EC 2.7.13.3)	_	_	0.0502161	6.6716	6.57433	6.65193	6.60889	6.51089	6.18301	6.91426	6.72927	6.72736	6.72764	6.79536	6.86575	6.70322	6.91805	6.91109	6.72612	6.62391	6.63576	6.46784	6.51083	6.74869
BP_RS05110	bp1029	cheW	cheW	chemotaxis protein CheW	Chemotaxis protein CheW	_	_	0.0692096	4.71979	4.12095	4.09319	4.48979	4.25088	4.36689	4.57732	4.79368	4.71772	4.70237	4.77086	4.60884	5.29762	5.28071	4.97871	4.62979	5.05991	5.13042	4.39943	4.44715	5.07813
BP_RS05115	bp1030	_	tsr	Tar ligand binding domain-containing protein	Methyl-accepting chemotaxis protein I	_	_	0.0322978	6.79967	6.37932	6.16564	6.15311	6.31293	6.46845	6.68884	6.55266	6.09808	6.53064	6.67675	6.60518	5.97715	6.55989	6.25218	6.48222	6.43871	6.74252	6.66765	6.3971	6.80265
BP_RS05120	bp1031	_	_	chemotaxis protein CheR	_	_	_	0.00530298	5.70411	5.44209	5.44582	5.88206	5.0648	4.75934	5.8435	5.24325	5.39416	5.38576	5.33971	4.76307	5.07617	5.72138	5.50491	5.67287	5.812	5.27082	5.49112	5.12118	4.59818
BP_RS05125	bp1032	_	cheB	chemotaxis response regulator protein-glutamate methylesterase	Protein-glutamate methylesterase/protein-glutamine glutaminase (EC 3.1.1.61) (EC 3.5.1.44)	_	_	0.00252318	6.14713	5.86332	6.03494	6.18109	5.80415	5.57028	6.23277	6.4738	6.02919	5.6626	5.88876	5.93576	5.64753	6.54161	5.71329	6.01224	6.12429	6.13121	5.89289	6.20647	5.50029
BP_RS05130	bp1033	cheY	cheY	chemotaxis response regulator CheY	Chemotaxis protein CheY	_	_	0.104793	5.29992	5.83347	6.08232	6.2854	6.67049	6.12234	6.17933	6.24176	6.31955	6.40628	6.35586	6.43654	6.68319	6.22388	6.49027	6.38415	6.65462	6.19246	6.64764	6.66674	6.35025
BP_RS05135	bp1034	cheZ	cheZ	protein phosphatase CheZ	Protein phosphatase CheZ (EC 3.1.3.-) (Chemotaxis protein CheZ)	_	_	0.00228704	5.90194	6.15637	6.08232	5.92572	5.7895	6.0202	6.43285	5.55514	6.13066	5.99405	6.13006	5.52419	5.97715	5.85652	5.88964	6.22241	5.90812	6.28956	5.96735	5.99501	5.93004
BP_RS05140	bp1035	_	_	IS110-like element IS1663 family transposase	Transposase for IS1663	_	_	0.0443973	5.2931	6.70291	6.65277	6.71667	5.76398	6.90321	7.72406	6.50586	7.15523	6.38748	5.86225	6.68101	7.37441	8.15556	7.72421	6.64099	7.45719	7.0777	6.83694	6.21729	7.10932
BP_RS05160	bp1036	_	_	aldo/keto reductase	Putative aldo/keto reductase	_	_	0.216435	9.71971	9.58162	9.58651	9.015	9.18153	9.11644	9.2105	9.16086	9.02993	9.13532	9.15942	9.10691	9.36532	9.317	9.32285	9.03254	9.16151	9.11308	8.98269	9.13986	9.06722
BP_RS05165	bp1037	lnt	_	apolipoprotein N-acyltransferase	_	7	A	0.902132	11.6503	11.4375	11.4186	11.0197	10.6421	10.6869	10.4681	10.668	10.6343	10.2574	10.3911	10.3566	9.96099	9.78425	9.80755	9.98222	10.1258	10.3098	9.73411	9.54907	9.1249
BP_RS05170	bp1038	_	corC	CBS domain-containing protein	Magnesium and cobalt efflux protein	4	A	0.747554	12.4147	12.2427	12.2458	12.1598	11.6981	11.7218	11.6373	11.443	11.5283	11.8515	11.7272	11.7992	11.3208	11.2594	11.3258	11.6454	11.4924	11.7768	11.4783	11.0726	10.8418
BP_RS05175	bp1039	ybeY	ybeY	rRNA maturation RNase YbeY	Endoribonuclease YbeY (EC 3.1.-.-)	4	A	0.813974	8.81772	8.56814	8.32173	7.66542	7.25988	7.34161	7.09502	7.11235	6.91888	6.87555	6.95007	6.94847	7.09419	7.11855	7.0514	6.17537	6.16657	6.23536	6.04603	5.85758	5.02967
BP_RS05180	bp1040	_	_	PhoH family protein	PhoH-like protein	4	A	0.815034	11.1992	11.1099	11.0735	10.4998	10.4705	10.3303	10.2858	10.3174	10.232	10.355	10.2578	10.4322	9.78045	9.81531	9.97368	9.47922	9.43123	9.70598	9.66169	9.44976	8.56752
BP_RS05185	bp1041	miaB	miaB	tRNA (N6-isopentenyl adenosine(37)-C2)-methylthiotransferase MiaB	tRNA-2-methylthio-N(6)-dimethylallyladenosine synthase (EC 2.8.4.3) ((Dimethylallyl)adenosine tRNA methylthiotransferase MiaB) (tRNA-i(6)A37 methylthiotransferase)	4	A	0.682994	12.4896	12.3463	12.2994	11.9482	11.4522	11.5023	11.7052	11.5344	11.6343	11.7109	11.7272	11.7085	11.1108	11.2388	11.2572	11.0323	10.9373	11.2251	11.1334	10.5746	9.41383
BP_RS05190	bp1042	_	_	phosphatase PAP2 family protein	_	7	A	0.794735	9.83874	9.67508	9.64244	9.29015	8.54866	8.61237	8.81296	8.70418	8.66389	8.65104	8.76369	8.94141	8.43489	8.35628	8.15813	7.85185	7.89979	7.80186	7.566	7.52118	6.65751
BP_RS05195	bp1044	_	_	IS110-like element IS1663 family transposase	Transposase for IS1663	12	_	0.595837	7.57244	7.38098	7.04562	6.84726	7.0202	6.47048	7.12159	6.62742	6.47636	6.86726	6.986	6.48281	7.70879	7.77116	7.74046	7.62433	7.72909	7.20128	7.51721	7.38476	7.50219
BP_RS05200	bp1045	secF	secF	protein translocase subunit SecF	Protein-export membrane protein SecF	7	A	0.928479	11.5389	11.5979	11.5358	11.1686	11.3298	11.3457	11.1577	11.3454	11.2713	11.3098	11.2935	11.2816	10.942	10.7415	10.8882	10.4681	10.4854	10.5914	10.6698	10.6173	10.3503
BP_RS05205	bp1046	secD	secD	protein translocase subunit SecD	Protein translocase subunit SecD	7	A	0.839936	13.6644	13.7043	13.6435	13.2193	13.1031	13.0549	13.1902	13.1513	13.1111	13.1636	13.0749	13.1428	12.6389	12.4634	12.6306	12.4075	12.2549	12.5794	12.5096	12.1622	11.5699
BP_RS05210	bp1047	yajC	yajC	preprotein translocase subunit YajC	Sec translocon accessory complex subunit YajC	4	A	0.732227	10.9743	11.233	11.2392	10.85	11.0039	10.9281	10.8615	11.0242	10.9249	11.3027	11.2529	11.2306	11.0825	10.7901	11.1136	10.6642	10.6679	10.6383	10.809	10.5697	10.2696
BP_RS05220	bp1049	tgt	tgt	tRNA guanosine(34) transglycosylase Tgt	Queuine tRNA-ribosyltransferase (EC 2.4.2.29) (Guanine insertion enzyme) (tRNA-guanine transglycosylase)	4	A	0.890108	11.7506	11.6467	11.6378	11.0625	10.9144	10.9485	10.7801	10.8824	10.769	10.7729	10.7544	10.7507	10.6063	10.5648	10.6573	10.0928	9.97959	10.2289	9.95704	9.71903	9.12379
BP_RS05225	bp1050	queA	queA	tRNA preQ1(34) S-adenosylmethionine ribosyltransferase-isomerase QueA	S-adenosylmethionine:tRNA ribosyltransferase-isomerase (EC 2.4.99.17) (Queuosine biosynthesis protein QueA)	4	A	0.828364	11.8691	11.5534	11.5719	11.19	10.6643	10.698	10.7414	10.8268	10.6968	10.7807	10.8239	10.914	10.1972	10.3673	10.4046	10.1127	9.92476	10.286	9.76656	9.31842	8.41982
BP_RS05230	bp1051	dacB	_	D-alanyl-D-alanine carboxypeptidase/D-alanyl-D-alanine-endopeptidase	Probable D-alanyl-D-alanine carboxypeptidase	4	A	0.737854	9.87896	9.93487	10.0087	10.4054	10.365	10.3369	10.536	10.4326	10.3279	10.3151	10.3731	10.4647	10.004	9.87969	10.0153	10.2227	10.1204	10.0911	10.012	9.87807	9.25631
BP_RS05235	bp1052	upp	upp	uracil phosphoribosyltransferase	Uracil phosphoribosyltransferase (EC 2.4.2.9) (UMP pyrophosphorylase) (UPRTase)	8	_	0.693074	10.0873	10.2757	10.1676	10.6747	10.8	10.7342	10.6401	10.8708	10.9104	11.079	11.0251	10.9921	11.3287	11.0841	11.0752	10.808	10.8212	10.8294	11.0099	10.8693	10.7685
BP_RS05240	bp1053	_	_	IS110-like element IS1663 family transposase	Transposase for IS1663	_	_	0.117344	6.85809	7.21728	7.09129	6.30998	5.71154	6.3163	5.75921	5.64194	6.31071	6.24253	6.00711	6.21693	7.10453	6.90419	6.84296	6.28485	6.73009	5.51111	6.9411	6.21729	6.69776
BP_RS05245	bp1054	prn	prn, omp69A	pertactin autotransporter	Pertactin autotransporter (P.93) [Cleaved into: Outer membrane protein P.69; Pertactin translocator]	8	_	0.781989	14.539	14.7924	14.9374	15.1087	15.4201	15.4063	15.4777	15.654	15.5734	15.8346	15.8399	15.758	15.5331	15.3402	15.5463	15.4138	15.2947	15.4553	15.2433	15.1315	14.7235
BP_RS05250	bp1055	cobA	cysG	uroporphyrinogen-III C-methyltransferase	Siroheme synthase [Includes: Uroporphyrinogen-III C-methyltransferase (Urogen III methylase) (EC 2.1.1.107) (SUMT) (Uroporphyrinogen III methylase) (UROM); Precorrin-2 dehydrogenase (EC 1.3.1.76); Sirohydrochlorin ferrochelatase (EC 4.99.1.4)]	4	A	0.900941	11.0557	11.1015	11.2925	11.2565	11.4051	11.5566	11.674	11.653	11.5824	11.4059	11.7184	11.5893	11.4367	11.5832	11.5574	10.9804	11.0451	11.1583	10.3515	10.4346	10.247
BP_RS05255	bp1056	_	_	hypothetical protein	Putative membrane protein	9	D	0.897379	10.0545	10.1927	10.1713	10.4245	10.6063	10.4413	10.3654	10.5294	10.5207	10.6309	10.5763	10.5481	11.163	11.0606	11.0816	10.9262	10.8772	10.8186	11.0656	11.16	11.3169
BP_RS05260	bp1057	_	_	DUF883 domain-containing protein	Putative membrane protein	9	D	0.652789	11.9281	11.9935	11.7499	12.5644	13.5074	13.508	12.8109	13.165	13.0487	12.6129	12.5115	12.4719	13.4257	13.5441	13.7429	13.134	12.9916	13.0439	13.3311	13.5342	14.4602
BP_RS05265	bp1058	_	_	phage holin family protein	Putative membrane protein	9	D	0.801951	9.7596	9.78052	9.52386	10.5738	10.7895	10.7503	10.2863	10.0578	10.0974	10.1856	10.1576	10.2452	11.186	10.9108	10.9642	10.3419	10.3108	10.2368	10.7481	10.7868	11.2935
BP_RS05270	bp1059	_	_	hypothetical protein	Uncharacterized protein	9	D	0.829581	9.0567	9.24158	9.02583	10.1199	10.1457	10.1338	9.53249	9.80766	9.82517	9.51051	9.58057	9.64512	10.2118	10.1114	10.2488	9.50119	9.62071	9.58007	9.72984	9.78291	10.1182
BP_RS05275	bp1060	ubiD	ubiD	4-hydroxy-3-polyprenylbenzoate decarboxylase	3-octaprenyl-4-hydroxybenzoate carboxy-lyase (EC 4.1.1.98) (Polyprenyl p-hydroxybenzoate decarboxylase)	_	_	0.188238	10.7207	10.8335	10.828	10.9028	10.9179	10.8853	10.9306	11.022	11.0624	11.1003	11.0578	11.023	11.0098	11.1201	11.0242	10.9488	11.0281	10.9691	10.9658	11.0176	10.8909
BP_RS05280	bp1061	_	_	lytic transglycosylase domain-containing protein	Putative transglycosylase	7	A	0.69809	12.0492	11.9607	11.9909	11.0473	10.6922	10.6517	11.1346	10.9985	10.9842	11.0397	11.1247	10.9902	10.9161	10.7976	10.9012	10.5257	10.4464	10.3273	10.5604	10.3753	9.4825
BP_RS05285	bp1062	_	_	pyridoxal phosphate-dependent aminotransferase	Probable aminotransferase	7	A	0.572435	11.5505	11.537	11.4729	11.1988	10.7837	10.7395	11.1417	10.9243	10.9818	11.1428	11.0648	11.2347	11.0641	10.9606	10.9029	10.77	10.615	10.6642	10.8684	10.4725	9.64752
BP_RS05290	bp1063	_	_	hypothetical protein	Uncharacterized protein	7	A	0.495868	8.30831	8.2468	8.59034	8.41908	8.76883	8.76765	8.83104	8.74988	8.62494	8.32107	8.88999	8.73556	7.85492	7.85326	8.03289	8.25784	8.30964	8.20774	8.30551	7.97681	7.56597
BP_RS05295	bp1064	_	maeB	NADP-dependent malic enzyme	NADP-dependent malic enzyme (EC 1.1.1.40)	_	_	0.167364	12.1317	12.1995	12.2393	12.462	12.4846	12.4671	12.3796	12.5245	12.5239	12.6635	12.5675	12.5484	12.6801	12.4783	12.5234	12.5393	12.3846	12.5271	12.6488	12.4853	12.5185
BP_RS05300	bp1065	_	_	patatin-like phospholipase family protein	_	4	A	0.293268	10.3623	10.4919	10.4234	10.5086	10.2186	10.3317	10.1862	10.1632	10.1701	10.343	10.2441	10.3139	10.182	10.1816	10.1427	10.1045	10.2843	10.1791	10.3042	10.1023	9.73228
BP_RS05305	bp1066	_	_	barstar family protein	Barstar domain-containing protein	_	_	0.18452	9.23969	9.24251	9.30556	9.22339	8.8628	8.90487	9.26432	8.95888	8.98475	8.75587	8.70303	8.81003	9.1714	9.01717	8.92826	9.12332	9.16402	8.90368	9.13932	9.27794	8.99953
BP_RS05320	bp1068	pstB	pstB, phoT	phosphate ABC transporter ATP-binding protein PstB	Phosphate import ATP-binding protein PstB (EC 7.3.2.1) (ABC phosphate transporter) (Phosphate-transporting ATPase)	8	_	0.374852	8.94711	9.09708	9.10336	9.46861	9.58589	9.51975	9.65488	9.66716	9.63198	9.65438	9.57881	9.57744	9.68937	9.5573	9.55685	9.78958	9.54306	9.7436	9.704	9.74788	10.2854
BP_RS05325	bp1069	pstA	pstA	phosphate ABC transporter permease PstA	Phosphate transport system permease protein PstA	5	C	0.763479	9.06536	8.99065	8.99525	9.24879	9.30683	9.26739	9.22392	9.37388	9.36451	9.29477	9.29649	9.33361	8.99366	8.8192	8.84225	9.41196	9.23562	9.40501	9.49128	9.38661	9.52056
BP_RS05330	bp1070	pstC	pstC	phosphate ABC transporter permease subunit PstC	Phosphate transport system permease protein	4	A	0.251128	9.3181	9.36191	9.43846	9.12208	9.19639	9.02784	8.97289	9.08393	9.13318	8.98842	9.04169	9.07029	8.85164	8.80476	8.82673	9.10226	9.09758	9.13956	8.93645	9.01494	9.22019
BP_RS05335	bp1071	pstS	pstS	phosphate ABC transporter substrate-binding protein PstS	Phosphate-binding protein PstS	9	D	0.322658	7.9955	8.17721	8.22194	8.34163	8.42355	8.35229	8.33176	8.46424	8.06803	8.51354	8.31763	8.41209	8.69445	8.61172	8.73419	8.50146	8.45193	8.4912	8.48824	8.46962	9.11638
BP_RS05340	bp1072	ppk1	ppk	polyphosphate kinase 1	Polyphosphate kinase (EC 2.7.4.1) (ATP-polyphosphate phosphotransferase) (Polyphosphoric acid kinase)	3	B	0.795461	9.94807	10.1227	10.2042	10.849	10.7213	10.7342	10.6991	10.7236	10.6635	10.8229	10.7879	10.8699	10.91	10.7961	10.8459	11.0616	10.9604	11.0645	10.9553	11.1283	11.3122
BP_RS05345	bp1073	ppx	ppx	exopolyphosphatase	Exopolyphosphatase (EC 3.6.1.11)	4	A	0.79564	11.4315	11.4169	11.4555	11.1526	11.0159	10.9757	11.0854	11.0412	11.0161	11.0343	10.9776	11.0928	11.005	10.8349	11.0164	10.6991	10.6354	10.7976	10.8134	10.6652	10.7652
BP_RS05350	bp1074	_	_	GNAT family N-acetyltransferase	Uncharacterized protein	3	B	0.547415	9.94036	10.0509	10.0967	10.2347	10.5198	10.368	10.421	10.5039	10.3542	10.4016	10.3798	10.2776	10.6361	10.6755	10.7338	10.7296	10.5919	10.5207	10.5165	10.7792	10.7692
BP_RS05355	bp1075	glmM	glmM	phosphoglucosamine mutase	Phosphoglucosamine mutase (EC 5.4.2.10)	4	A	0.899988	12.4165	12.3684	12.2756	12.213	12.2471	12.2825	11.9031	11.9929	11.968	11.9503	11.8788	11.8661	11.9912	11.8606	11.8912	11.6616	11.6531	11.7615	11.799	11.8086	11.8822
BP_RS05360	bp1076	folP	folP	dihydropteroate synthase	Dihydropteroate synthase (DHPS) (EC 2.5.1.15) (Dihydropteroate pyrophosphorylase)	4	A	0.815739	11.7601	11.6717	11.5627	11.5265	11.0097	11.0346	10.9582	10.7823	10.6893	10.8449	10.8885	10.956	10.7857	10.5828	10.6171	10.4335	10.2314	10.4525	10.4673	10.3438	10.0602
BP_RS05365	bp1077	ftsH	ftsH	ATP-dependent zinc metalloprotease FtsH	ATP-dependent zinc metalloprotease FtsH (EC 3.4.24.-)	7	A	0.683758	14.5798	14.5135	14.4323	14.3438	14.2387	14.2451	14.0989	14.1497	14.1544	14.0935	14.0619	14.0996	14.3131	14.2535	14.2666	14.0681	13.9093	14.1299	14.1699	14.0771	14.2793
BP_RS05375	bp1078	_	rlmE, ftsJ, rrmJ	RlmE family RNA methyltransferase	Ribosomal RNA large subunit methyltransferase E (EC 2.1.1.166) (23S rRNA Um2552 methyltransferase) (rRNA (uridine-2'-O-)-methyltransferase)	7	A	0.807846	11.5231	11.4564	11.3499	10.7401	10.6906	10.7265	10.7705	10.7454	10.6222	10.6049	10.5415	10.6075	10.5625	10.5034	10.6121	10.4858	10.5569	10.5205	10.3346	10.2359	10.0755
BP_RS05380	bp1079	_	_	YhbY family RNA-binding protein	CRM domain-containing protein	4	A	0.950046	12.2421	12.1171	12.0226	11.6756	11.6602	11.6906	11.6966	11.6539	11.5351	11.0215	11.1609	11.2014	11.1969	11.3085	11.3504	10.9113	10.8704	11.0055	10.6052	10.3942	10.0451
BP_RS05385	bp1080	_	_	IS481-like element IS481 family transposase	Transposase	_	_	0.0452102	8.77685	8.62916	8.61583	7.78367	7.58723	7.85586	7.58118	7.38324	7.7146	7.47671	7.5015	7.48033	7.79416	7.78374	7.72421	7.48813	7.45605	7.57928	7.23097	7.32706	7.10419
BP_RS05390	bp1081	_	_	type II secretion system F family protein	_	_	_	0.14008	6.49346	6.01595	6.26377	6.15311	5.51136	5.60553	5.66788	5.16803	5.19088	5.63903	5.054	5.94406	5.6468	5.62713	6.02971	5.3672	5.94647	5.56541	5.16114	5.41043	4.59811
BP_RS05400	bp1084	_	thrB	homoserine kinase	Homoserine kinase (HK) (HSK) (EC 2.7.1.39)	4	A	0.696338	10.9116	10.9474	11.0858	10.389	10.0822	10.0059	10.2958	10.1647	10.0552	10.2643	10.1838	10.0516	10.0461	9.93831	10.0419	9.72283	9.61105	9.77886	9.76656	9.54907	8.88188
BP_RS05405	bp1085	dusA	dusA	tRNA dihydrouridine(20/20a) synthase DusA	tRNA-dihydrouridine(20/20a) synthase (EC 1.3.1.91) (U20-specific dihydrouridine synthase) (U20-specific Dus) (tRNA-dihydrouridine synthase A)	7	A	0.863147	10.2575	10.329	10.3598	10.0155	10.0043	9.82413	9.88471	9.81882	9.80234	9.80427	9.8494	9.82235	9.66335	9.45202	9.75408	9.40399	9.48845	9.38924	9.33821	9.25598	9.13482
BP_RS05410	bp1086	_	_	IS481-like element IS481 family transposase	Transposase	_	_	0.0340087	2.11424	0.752809	0	1.24028	1.76773	1.93183	3.00539	1.50785	1.73311	0	0	1.52689	1.73959	0	1.91669	2.45286	1.64262	2.03331	2.45783	2.54329	2.40153
BP_RS05415	bp1087	_	_	CBS domain-containing protein	Uncharacterized protein	5	C	0.749082	9.42321	9.43083	9.55254	9.93751	10.711	10.8402	10.2787	10.338	10.5696	10.2867	10.1405	10.0833	10.004	10.1587	10.1949	10.9518	10.8809	10.7874	10.8934	11.1313	12.1043
BP_RS05420	bp1088	_	_	YihY family inner membrane protein	UPF0761 membrane protein BP1088	2	B	0.785572	9.92043	9.79414	9.77765	10.1479	10.3132	10.5189	10.3021	10.1248	10.1247	9.62325	9.53543	9.64768	10.1101	10.3274	10.047	10.3871	10.3721	10.3189	9.98903	10.2722	10.4109
BP_RS05425	bp1089	_	_	DUF2069 domain-containing protein	Putative membrane protein	7	A	0.725726	9.58546	9.43037	9.34558	9.09987	9.09534	9.25685	8.87836	9.05822	8.88453	8.61118	8.64171	8.68039	8.58085	8.62201	8.73826	8.48124	8.55278	8.65238	7.90529	8.30094	8.64377
BP_RS05430	bp1090	_	selO	YdiU family protein	Protein adenylyltransferase SelO (EC 2.7.7.-) (EC 2.7.7.n1)	4	A	0.776434	11.1238	11.1019	11.1228	10.9433	10.7192	10.6745	10.4583	10.5567	10.555	10.4612	10.5161	10.4657	10.4904	10.1873	10.359	10.2562	10.2198	10.3168	10.081	9.99557	10.2861
BP_RS05435	bp1091	_	_	response regulator transcription factor	Probable two-component response regulator	7	A	0.866401	9.8561	9.87419	9.79013	10.2325	10.4055	10.4033	9.82491	9.99992	9.92804	9.79103	9.89881	9.87084	10.2051	9.85932	9.97008	9.5191	9.50502	9.39787	9.57922	9.40886	9.61374
BP_RS05440	bp1092	_	_	EAL domain-containing protein	Histidine kinase (EC 2.7.13.3)	7	A	0.897005	11.546	11.6319	11.7026	11.6732	11.4472	11.4675	11.3285	11.3401	11.35	11.3781	11.456	11.4233	11.0079	11.0177	11.0233	11.4198	11.3409	11.5001	11.1848	11.1974	11.2334
BP_RS05450	bp1094	_	livG	ABC transporter ATP-binding protein	High-affinity branched-chain amino acid transport ATP-binding protein	_	_	0.0140469	2.90395	3.49519	2.8527	3.19423	2.82727	3.2137	3.20188	4.03028	4.08832	2.04259	3.42068	3.5864	3.37262	4.22297	3.78893	3.45984	4.03293	4.10773	4.11556	3.51221	4.29001
BP_RS05455	bp1095	_	livH	branched-chain amino acid ABC transporter permease	High-affinity branched-chain amino acid transport system permease protein	_	_	0.00836993	3.71607	4.00644	3.57182	3.30098	2.47845	3.2397	2.01784	3.11598	4.01116	3.344	3.95895	2.225	3.43678	2.88667	3.59721	3.61669	3.5375	2.6433	2.67642	3.76084	3.87368
BP_RS05460	bp1096	_	_	branched-chain amino acid ABC transporter permease	_	_	_	0.179139	4.34574	4.06666	3.74922	4.17236	4.76478	4.75472	5.00051	4.46543	4.51396	3.6157	4.63839	4.13077	4.67647	5.70985	5.17184	5.21961	5.92739	5.22295	4.37665	5.56231	5.12001
BP_RS05465	bp1097	_	livK	ABC transporter substrate-binding protein	Putative amino acids binding protein	_	_	0.0381238	4.74366	5.13607	4.55427	5.39735	4.76478	5.27784	5.31339	4.64213	4.82307	4.55314	4.27338	4.37555	5.21958	5.65063	5.23869	4.60883	5.6971	5.06005	5.20568	4.86328	5.36137
BP_RS05470	bp1098	_	livF	ABC transporter ATP-binding protein	High-affinity branched-chain amino acid transport ATP-binding protein	_	_	0.129884	3.43267	3.9401	3.90717	4.096	4.21177	4.60748	3.88009	4.3477	4.15998	4.26905	4.42331	4.52507	4.97325	4.71169	4.88214	4.95463	4.85469	4.72046	4.63653	4.84556	4.29001
BP_RS05475	bp1099	_	_	long-chain fatty acid--CoA ligase	Putative long-chain fatty-acid--CoA ligase	13	_	0.521072	7.61026	7.29271	7.25454	6.85106	7.31768	7.53721	7.15751	7.18728	6.95469	6.68089	6.78311	6.49941	7.01867	7.4558	7.36421	7.03387	7.11556	7.04647	6.36933	6.73096	6.65751
BP_RS05480	bp1100	_	_	TetR family transcriptional regulator	Probable TetR-family transcriptional regulator	10	D	0.511945	7.69394	7.72421	7.47242	7.00021	6.63826	6.75518	7.0722	6.246	6.22692	6.62068	6.32179	6.46755	7.21364	7.53054	7.05354	5.97166	6.87632	6.84192	6.16999	6.48356	5.50242
BP_RS05485	bp1101	_	_	membrane protein	Putative membrane protein	7	A	0.587888	7.19158	6.80712	6.4868	6.00794	6.27831	6.32684	6.20247	5.94014	6.18476	5.76442	5.93743	5.94577	6.08051	5.92461	6.29858	5.08465	5.37316	5.6006	5.49112	5.10062	4.95648
BP_RS05490	bp1102	lysS	lysS	lysine--tRNA ligase	Lysine--tRNA ligase (EC 6.1.1.6) (Lysyl-tRNA synthetase) (LysRS)	4	A	0.944313	13.067	12.977	12.9095	12.5701	12.6436	12.5902	12.4449	12.5845	12.5057	12.573	12.4974	12.5431	12.096	12.1406	12.215	11.7574	11.6381	11.9866	11.7571	11.5286	11.3848
BP_RS05495	bp1103	_	_	SDR family oxidoreductase	Probable short chain dehydrogenase	7	A	0.898442	11.3882	11.079	11.0451	10.7801	10.4989	10.7325	10.7529	10.6654	10.6151	10.4442	10.4415	10.5658	9.93325	10.1272	10.2813	9.72009	9.59076	9.97715	9.84885	9.6292	9.56364
BP_RS05500	bp1104	prfB	prfB	peptide chain release factor 2	Peptide chain release factor 2 (RF-2)	4	A	0.86612	13.1563	13.2042	13.1053	13.0942	12.4928	12.5303	12.5861	12.622	12.6488	12.8757	12.7453	12.7986	12.5138	12.411	12.504	11.8322	11.6948	12.0872	11.7582	11.2045	10.5061
BP_RS05505	bp1105	recJ	recJ	single-stranded-DNA-specific exonuclease RecJ	Single-stranded-DNA-specific exonuclease RecJ	4	A	0.759303	10.9398	10.7979	10.7543	10.4737	10.3521	10.383	10.0631	10.1379	10.1437	10.1367	10.2172	10.1695	9.98255	9.93459	10.0907	9.72709	9.66163	9.89567	9.71266	9.71609	9.94666
BP_RS05510	bp1106	_	_	hypothetical protein	Putative exported protein	4	A	0.723923	9.33144	9.19115	9.27131	8.83497	8.7663	8.79092	8.66662	8.59382	8.69215	8.33774	8.65223	8.64948	7.97336	8.36297	8.46555	8.10897	8.20118	8.22936	8.01447	8.02685	8.02522
BP_RS05515	bp1107	_	lolC	lipoprotein-releasing ABC transporter permease subunit	Lipoprotein releasing system transmembrane protein	7	A	0.915429	11.4576	11.3012	11.2817	11.1434	10.8476	10.7911	10.7529	10.6643	10.5814	10.5233	10.3652	10.5652	9.98255	10.0054	9.91099	10.1092	10.1639	10.2279	9.95471	9.96328	9.50437
BP_RS05520	bp1108	lolD	lolD	lipoprotein-releasing ABC transporter ATP-binding protein LolD	Lipoprotein-releasing system ATP-binding protein LolD (EC 7.6.2.-)	7	A	0.872859	9.28015	9.13264	9.12212	8.88931	8.82319	8.99177	8.85023	8.49391	8.66253	8.41891	8.50264	8.29216	7.97516	7.56387	7.8407	8.14428	8.15142	8.26376	7.72854	7.99	7.77104
BP_RS05525	bp1109	_	_	TatD family hydrolase	Putative deoxyribonuclease (EC 3.1.21.-)	7	A	0.398131	8.13605	7.99913	7.90355	7.74067	7.70784	7.7665	7.60231	7.35738	7.61956	7.17962	7.08872	7.24488	7.26895	7.40962	7.10614	7.39462	7.49002	7.31776	7.43934	7.45617	7.92071
BP_RS05530	bp1110	sphB3	sphB3	autotransporter SphB3	Serine protease	11	_	0.473852	8.88567	8.58803	8.34942	7.82953	7.89962	7.80721	7.86094	7.75361	7.89528	7.93256	7.92807	7.72618	8.02501	8.35187	8.15004	7.86048	8.1728	7.7559	7.80348	7.63659	7.59684
BP_RS05535	bp1112	_	bipA	inverse autotransporter beta-barrel domain-containing protein	Putative outer membrane ligand binding protein	8	_	0.782515	14.1722	14.5738	14.9391	15.3954	15.6617	15.5978	15.7458	15.8006	15.7852	15.966	15.9253	15.8626	15.8465	15.6007	15.7373	15.7701	15.6842	15.8568	15.5522	15.4891	15.5478
BP_RS05540	bp1113	_	_	ComEC family competence protein	_	4	A	0.907019	10.6686	10.7426	11.2617	11.3112	11.7583	11.985	11.5811	11.7173	11.7223	11.07	11.691	11.3729	10.8301	10.8492	11.0822	10.6231	10.7556	10.7162	9.91093	10.1809	9.86076
BP_RS05550	bp1115	_	_	alpha/beta hydrolase	Probable hydrolase	_	_	0.177195	9.1314	9.18642	9.29288	9.54757	9.56726	9.65451	9.27382	9.5686	9.49856	9.43284	9.55211	9.4435	9.59432	9.47823	9.59257	9.50728	9.61774	9.53486	9.47195	9.56567	9.99506
BP_RS05555	bp1116	_	_	PHP domain-containing protein	POLIIIAc domain-containing protein	4	A	0.643857	10.9366	10.7914	10.7736	10.7294	10.9954	11.1785	10.9178	10.8898	10.8827	10.4196	10.6293	10.5359	10.7929	10.7834	10.8271	10.7235	10.6724	10.7122	10.4315	10.5946	10.8081
BP_RS05560	bp1117	greB	greB	transcription elongation factor GreB	Transcription elongation factor GreB (Transcript cleavage factor GreB)	2	B	0.527056	8.74695	8.66846	8.71881	8.86503	8.41538	8.46531	8.38262	8.08404	8.31078	8.42655	8.34163	8.38798	8.59618	8.47471	8.43695	8.47701	8.41597	8.56144	8.65345	8.7513	9.42633
BP_RS05565	bp1118	_	_	IS481-like element IS481 family transposase	Transposase	4	A	0.331047	7.24721	7.32845	7.23976	7.12192	6.80269	6.78837	6.73087	7.13145	7.09317	7.03702	6.69042	6.96446	6.40162	6.52193	6.44936	6.62286	6.53579	6.83175	6.89249	6.46667	6.35025
BP_RS05570	bp1119	fim2	fim2	serotype 2 fimbrial subunit	Serotype 2 fimbrial subunit	7	A	0.505022	11.7334	11.8898	11.9107	11.5718	11.4616	11.4548	11.4029	11.3935	11.3802	11.7635	11.6275	11.7212	11.6942	11.3976	11.5539	11.4037	11.3347	11.2813	11.663	11.4413	11.0114
BP_RS05575	bp1120	_	maeB	NADP-dependent malic enzyme	NADP-dependent malic enzyme (EC 1.1.1.40)	1	B	0.457908	14.2266	14.3277	14.3823	14.3526	14.5217	14.5035	14.2311	14.4381	14.5172	14.5896	14.4559	14.419	14.5955	14.4542	14.5279	14.5591	14.4581	14.6402	14.6596	14.6326	14.8223
BP_RS05580	bp1121	mdeB	aceE	alpha-ketoglutarate dehydrogenase	Pyruvate dehydrogenase E1 component (EC 1.2.4.1)	5	C	0.84306	7.49497	7.59623	7.71783	7.82759	8.01038	7.70835	8.11835	7.9838	8.02471	7.9834	7.98622	7.96663	7.31206	7.39403	7.34484	8.21598	8.31853	8.22649	8.55724	8.43769	9.14655
BP_RS05585	bp1122	_	_	Lrp/AsnC family transcriptional regulator	AsnC-family transcriptional regulator	_	_	0.0382792	5.3538	5.85452	5.38751	6.46264	6.20434	6.47772	6.46754	6.28347	6.26091	6.50691	6.2664	6.38526	6.35041	6.21126	6.5233	6.71177	6.24457	6.32053	6.83395	6.82561	6.44376
BP_RS05590	bp1123	_	_	oligopeptide transporter%2C OPT family	Putative membrane protein	4	A	0.763446	11.2119	11.2082	11.2379	11.022	10.888	10.8367	10.8623	10.9616	10.8093	11.0602	11.233	11.1735	11.0979	10.8803	11.1356	10.3963	10.3938	10.5144	10.4571	10.0844	9.65128
BP_RS05595	bp1124	_	odhA	2-oxoglutarate dehydrogenase E1 component	Oxoglutarate dehydrogenase (succinyl-transferring) (EC 1.2.4.2)	9	D	0.829669	14.2286	14.3738	14.443	14.9463	15.155	14.9681	14.5518	14.6596	14.794	14.9622	14.8028	14.7791	15.522	15.4198	15.5246	14.7322	14.6743	14.8721	14.8792	14.7834	15.2977
BP_RS05600	bp1125	odhB	odhB	2-oxoglutarate dehydrogenase complex dihydrolipoyllysine-residue succinyltransferase	Dihydrolipoyllysine-residue succinyltransferase component of 2-oxoglutarate dehydrogenase complex (EC 2.3.1.61) (2-oxoglutarate dehydrogenase complex component E2)	9	D	0.895761	12.4481	12.5991	12.6108	13.1172	13.2118	13.1871	13.1905	13.4347	13.4096	13.6925	13.6348	13.5566	14.3119	14.1452	14.2928	13.3499	13.1991	13.3937	13.6677	13.6542	14.1654
BP_RS05605	bp1126	lpdA	odhL	dihydrolipoyl dehydrogenase	Dihydrolipoyl dehydrogenase (EC 1.8.1.4)	9	D	0.927699	11.6197	11.8622	11.9056	12.1446	12.3009	12.2731	12.3073	12.4447	12.5154	12.7802	12.6511	12.6416	13.3103	13.0387	13.2188	12.1984	12.0848	12.2069	12.5799	12.4742	12.8573
BP_RS05610	bp1127	_	_	cell division protein ZapE	Uncharacterized protein	10	D	0.884721	9.00257	9.17769	9.37623	9.15952	9.19372	9.30819	9.68973	9.63106	9.58768	9.73645	9.78867	9.73068	9.91689	9.96261	9.97603	9.20435	8.99942	9.06282	9.31466	9.12798	9.11775
BP_RS05615	bp1128	_	fabG	SDR family oxidoreductase	3-oxoacyl-[acyl-carrier protein] reductase (EC 1.1.1.100)	_	_	0.0103418	6.43931	6.48911	6.79037	6.74131	6.87505	6.86242	6.95347	6.69117	6.88709	6.91381	7.05097	6.48281	7.0056	6.88201	6.99803	6.9037	7.09465	6.93491	6.75428	6.70124	6.76368
BP_RS05620	bp1129	_	_	LysR family transcriptional regulator	LysR-family transcriptional regulator	4	A	0.580763	8.925	8.75771	8.85274	8.50003	8.41008	8.38529	8.45184	8.51602	8.5093	8.48247	8.35474	8.43672	8.17482	8.07476	8.27834	8.22466	8.29482	8.28489	8.03535	7.91005	7.26475
BP_RS05630	bp1131	_	_	tripartite tricarboxylate transporter substrate binding protein	Putattive exported protein	11	_	0.700638	7.97918	7.81437	7.8321	7.66008	7.19489	7.04371	7.17972	6.71231	6.81767	6.8824	7.02731	7.10745	6.63233	6.69011	6.67057	7.26254	7.37521	7.37003	7.93939	7.79555	7.68079
BP_RS05635	bp1132	_	_	SDR family oxidoreductase	Probable short-chain dehydrogenase	4	A	0.319993	7.30656	7.11211	6.9532	7.25011	6.08895	5.51831	5.23255	6.00618	5.68305	5.63222	5.80773	6.00079	5.85813	5.94479	5.5595	6.02534	5.88855	6.03333	4.97996	5.08058	5.0807
BP_RS05645	bp1134	_	_	IS481-like element IS481 family transposase	Transposase	_	_	0.02073	0.503885	0.752809	0.716075	0.749507	1.1392	0.468096	1.1188	0.942552	1.11405	0.525307	0	0	0	0.936332	0	0	0	0	0.925072	1.02927	0
BP_RS05640	bp1135	_	_	TauD/TfdA family dioxygenase	_	_	_	0.147259	6.70508	6.88036	6.60152	6.89301	6.52615	5.95573	6.53801	5.36688	5.97581	5.63729	6.03833	6.23517	5.88237	6.79635	6.21945	5.72547	5.94647	6.39381	5.6862	6.14036	5.39149
BP_RS05655	bp1136	_	fecI	sigma-70 family RNA polymerase sigma factor	ECF-family sigma factor	_	_	0.150422	3.39854	2.83788	2.62749	4.32362	3.70332	3.30382	5.07922	4.21075	4.38327	5.02277	5.05073	4.50073	4.14639	4.12199	4.46842	4.19641	4.03293	4.52759	5.73143	4.99578	4.57567
BP_RS05660	bp1137	_	fecR	FecR domain-containing protein	Putative signal transduction protein	_	_	0.233441	3.20024	2.96956	3.43075	3.43822	4.70881	3.92776	5.14298	4.79929	4.69049	4.72342	5.17263	5.1239	4.00031	4.54863	3.79351	4.24032	4.51354	4.23428	4.75833	5.23655	5.02967
BP_RS05665	bp1138	_	bfrH	TonB-dependent siderophore receptor	Putative ferric siderophore receptor	3	B	0.653866	5.8914	5.9012	6.03494	5.44547	5.7895	6.37325	6.20247	6.13226	5.80674	6.22338	6.15211	6.33694	6.61236	7.0713	6.68666	6.46817	6.75152	6.5469	6.68035	7.11479	7.29658
BP_RS05670	bp1139	_	_	DUF3649 domain-containing protein	Putative iron uptake protein	1	B	0.780496	2.11424	1.90041	2.03976	2.45219	2.53863	3.27216	3.00539	4.45757	3.17402	4.1302	4.00917	3.41082	4.32879	4.81098	3.42149	4.70087	5.28611	4.85004	5.82589	6.07985	6.11464
BP_RS05675	bp1140	_	_	PepSY domain-containing protein	_	3	B	0.703799	7.83402	7.80671	7.81663	8.12509	8.17803	8.27908	8.24282	8.37397	8.23136	8.41012	8.29878	8.2432	8.51041	8.89235	8.58802	8.62378	8.88312	8.92352	8.96786	8.77013	8.80711
BP_RS05680	bp1141	_	_	DUF3325 domain-containing protein	Putative iron uptake protein	1	B	0.72073	9.34407	9.69181	9.71225	10.3928	10.5969	10.6146	10.4074	10.62	10.5694	10.8118	10.7776	10.686	11.1693	10.9285	11.12	10.9973	11.0719	11.0739	11.1857	11.1414	11.2522
BP_RS05690	bp1143	_	trpS	tryptophan--tRNA ligase	Tryptophan--tRNA ligase (EC 6.1.1.2) (Tryptophanyl-tRNA synthetase) (TrpRS)	9	D	0.745104	10.1912	10.3427	10.4253	10.7324	10.8239	10.7855	10.6526	10.7522	10.8905	10.9179	10.8547	10.9127	11.3102	11.1265	11.1414	10.7898	10.7434	10.9238	10.9474	10.854	10.8483
BP_RS05695	bp1144	tex	tex	RNA-binding transcriptional accessory protein Tex	Protein tex	4	A	0.902673	12.6181	12.7263	12.7891	12.5655	12.7286	12.7352	12.8832	12.9603	12.9139	13.0518	13.0559	13.0025	12.6942	12.558	12.6837	12.5321	12.4123	12.5932	12.5669	12.4443	12.4423
BP_RS05700	bp1145	_	_	ATP-dependent DNA helicase	Probable ATP-dependent helicase	7	A	0.90015	11.0692	11.1159	11.1212	10.9557	10.7887	10.752	10.7763	10.7737	10.7277	10.6693	10.6308	10.7146	10.2925	10.0874	10.2876	10.2975	10.3563	10.3479	10.1964	10.0996	9.82152
BP_RS05705	bp1146	_	comL, bamD	outer membrane protein assembly factor BamD	Outer membrane protein assembly factor BamD	8	_	0.777367	12.2388	12.3428	12.3803	12.4646	12.6415	12.6713	12.7507	12.6718	12.7086	12.8728	12.8257	12.7766	13.0637	12.9547	12.975	12.7407	12.5616	12.7425	12.8748	12.9571	12.909
BP_RS05710	bp1147	_	rluD	RluA family pseudouridine synthase	Pseudouridine synthase (EC 5.4.99.-)	4	A	0.820671	10.6709	10.6487	10.6713	10.7701	10.2226	10.1386	10.1694	10.1636	10.1156	10.1252	10.1994	10.1765	9.63734	9.54516	9.6382	9.51436	9.64587	9.78439	9.4018	9.2076	8.35118
BP_RS05715	bp1148	pgeF	_	peptidoglycan editing factor PgeF	Purine nucleoside phosphorylase	4	A	0.833119	9.48789	9.42567	9.39115	9.32035	9.08453	9.34181	9.06672	8.96719	9.0126	8.77842	8.88406	8.75768	8.43489	8.54954	8.56498	8.45578	8.66053	8.57843	8.45095	8.47141	8.10408
BP_RS05720	bp1149	phaC	phbC	class I poly(R)-hydroxyalkanoic acid synthase	Poly-beta-hydroxybutyrate polymerase (EC 2.3.1.-)	5	C	0.888489	11.0746	11.0702	11.1282	11.3667	11.4453	11.3995	11.4858	11.5839	11.5171	11.4141	11.3523	11.3475	10.6333	10.6363	10.7308	11.7822	11.6381	11.8367	12.252	12.5648	13.5377
BP_RS05725	bp1150	phbB	phbB	acetoacetyl-CoA reductase	Acetoacetyl-CoA reductase (EC 1.1.1.36)	2	B	0.941007	10.49	10.5284	10.4243	11.3687	11.2272	11.2208	11.3516	11.3245	11.4229	11.3409	11.2664	11.2929	10.9212	10.88	10.8366	12.4512	12.2678	12.3026	13.2053	13.3967	14.6671
BP_RS05730	bp1151	phaR	_	polyhydroxyalkanoate synthesis repressor PhaR	Uncharacterized protein	1	B	0.550552	9.60347	9.86408	9.77628	10.0372	10.6388	10.8465	10.4982	10.6918	10.6194	10.3624	10.172	10.1882	10.54	10.3657	10.5044	10.5756	10.5184	10.5441	10.75	10.9435	11.7688
BP_RS05735	bp1152	_	_	iron transporter	Putative exported protein	3	B	0.964723	9.03045	8.67218	8.76	10.3817	10.6024	10.643	11.18	11.2978	11.0739	11.3442	11.1984	11.0782	11.159	11.1534	11.064	11.8639	11.8128	11.6897	13.0406	13.3304	13.856
BP_RS05740	bp1153	_	_	cupredoxin domain-containing protein	Putative exported protein	5	C	0.916867	7.01608	6.99265	6.8665	8.20161	8.52199	8.36082	9.15812	9.11174	8.77185	9.08513	8.73857	8.68039	8.31032	8.09418	7.93811	8.70692	8.96374	8.83937	10.0839	10.0086	10.408
BP_RS05745	bp1154	_	_	FTR1 family protein	Putative membrane protein	5	C	0.976218	8.41077	8.41193	8.32872	9.66169	9.75839	9.6573	10.0253	10.2193	10.0194	10.181	10.2053	10.1523	9.00025	8.7948	8.89522	9.8092	9.92677	9.94582	10.874	10.9686	11.1216
BP_RS05750	bp1155	_	_	4Fe-4S binding protein	Putative regulatory protein	8	_	0.932243	8.6963	8.59388	8.3411	9.62234	9.49434	9.47956	9.92178	9.96159	9.82819	9.68252	9.83537	9.76056	9.19439	9.19044	9.10112	9.69813	9.58737	9.53051	10.4086	10.3944	10.3605
BP_RS05755	bp1156	_	_	PhzF family phenazine biosynthesis protein	Conserved hypotheticals protein	7	A	0.518412	8.83103	8.94936	8.84446	8.66289	8.17921	8.25652	8.67446	8.44713	8.41766	8.5341	8.49018	8.42794	8.38528	8.36596	8.129	8.02045	8.041	7.99723	8.44265	7.96461	7.77833
BP_RS05765	bp1158	_	_	VOC family protein	Putative dioxygenase	_	_	0.207588	6.42561	6.18028	6.18949	6.54535	6.45264	6.74763	6.52072	6.37593	6.6312	5.92443	6.48134	6.3613	6.12517	6.69601	5.83441	6.57694	6.48849	6.3337	6.49523	6.83691	7.10419
BP_RS05770	bp1159	_	_	amidohydrolase family protein	Putative 2-pyrone-4,6-dicarboxylic acid hydrolase	_	_	0.0235878	5.49655	5.63343	5.10521	5.38795	5.56961	5.67899	5.83894	5.2077	5.88966	5.35887	5.91695	5.77303	5.6468	4.60505	4.8255	5.2363	5.38899	5.84436	5.67975	5.59719	5.72527
BP_RS05775	bp1160	_	_	tripartite tricarboxylate transporter substrate binding protein	Putative lipoprotein	_	_	0.141492	6.08191	6.10112	6.13415	5.96809	6.35384	6.12661	6.50321	6.44101	6.51301	6.51111	6.44786	6.37246	6.4183	6.58019	6.57983	6.8428	6.82633	6.36111	6.83395	6.64232	6.5517
BP_RS05780	bp1161	_	_	mandelate racemase/muconate lactonizing enzyme family protein	Putative racemase	2	B	0.697281	5.62039	5.77186	5.97039	6.41079	6.54125	6.42573	6.27135	6.32707	6.02714	6.45701	6.48134	6.68455	7.26063	6.80841	6.80995	6.99475	6.85632	6.8417	7.16482	6.79577	7.14653
BP_RS05785	bp1162	_	_	LysR family transcriptional regulator	Probable LysR-family transcriptional regulator	_	_	0.166595	6.90417	6.97908	6.94411	6.86282	7.38334	7.44052	7.20348	7.34679	7.38119	6.85499	7.34076	7.10091	6.86957	7.37698	6.78966	7.18086	7.63209	7.14721	6.8788	7.09051	6.87165
BP_RS05790	bp1163	_	_	SDR family oxidoreductase	Probable short-chain dehydrogenase	9	D	0.506492	6.99975	6.93378	7.02139	7.31944	7.69198	7.72918	7.50406	7.67118	7.90457	7.81294	7.82649	7.75311	8.00033	7.67769	7.9704	8.07968	7.98529	7.90548	8.07829	8.10213	8.19621
BP_RS05795	bp1164	_	_	MFS transporter	Putative membrane protein	_	_	0.0156817	7.29421	7.08332	6.84485	6.49569	6.29903	6.5937	6.40716	6.22689	6.27186	6.07948	6.56245	6.37246	6.39577	6.62955	6.46257	6.45397	6.49155	6.36111	6.41191	6.10031	6.11464
BP_RS05800	bp1165	_	_	sodium:solute symporter family protein	Sodium/solute symporter	7	A	0.688215	9.34147	9.06615	8.77603	7.48021	7.5854	7.4431	7.67108	7.35738	7.6245	7.67389	7.51693	7.47472	8.09561	8.48965	8.20903	7.95432	7.91547	7.98234	7.81962	7.97017	7.85994
BP_RS05805	bp1166	_	ldcA	LD-carboxypeptidase	Putative muramoyltetrapeptide carboxypeptidase (EC 3.4.17.13)	5	C	0.429845	7.47167	7.66985	7.69456	7.42499	7.82885	7.78619	7.57598	8.02271	7.89548	7.72556	7.84337	7.58747	7.35026	7.18346	7.44024	7.8522	7.61132	7.929	7.64043	7.73985	7.15417
BP_RS05810	bp1167	_	_	aldolase	Putative adolase	10	D	0.543796	7.95881	7.94572	8.03177	8.10106	7.73906	7.76355	7.67855	7.59053	7.83408	7.61223	7.92263	7.64713	7.85444	8.17394	7.80254	7.9441	7.65482	7.79055	7.09488	7.65962	6.89743
BP_RS05815	bp1168	_	_	LysR family transcriptional regulator	LysR-family transcriptional regulator	6	_	0.694324	10.1395	10.0786	10.1305	10.2444	10.648	10.9615	10.5969	10.5622	10.4822	10.0544	10.0951	10.2566	10.6301	10.8031	10.8	10.7391	10.853	10.7626	10.4405	10.7142	10.728
BP_RS05820	bp1169	_	_	NAD(P)-dependent oxidoreductase	Putative oxidoreductase	7	A	0.340082	7.01366	6.74263	6.79037	6.71096	6.64502	6.88567	6.40716	6.84948	6.87794	6.96817	6.85728	6.86747	6.34825	5.98964	6.30591	6.74955	6.52763	6.97805	6.71821	6.66674	5.8579
BP_RS05825	bp1170	_	_	tripartite tricarboxylate transporter substrate binding protein	Putative exported protein	5	C	0.575113	6.49242	6.53578	6.65215	6.49904	6.68831	6.38411	6.13191	6.79063	6.37908	6.81726	6.84963	6.81964	5.89446	5.83309	6.23727	7.00102	6.6847	7.16287	6.98484	7.29001	7.34296
BP_RS05830	bp1171	_	_	amino acid synthesis family protein	Uncharacterized protein	3	B	0.264264	5.23874	5.7075	5.02204	5.26555	5.50767	5.53125	5.63796	5.08557	5.5129	5.74504	5.3022	5.49339	5.48047	5.60308	5.61088	5.74967	5.96688	5.6502	6.11771	6.01123	6.31348
BP_RS05835	bp1172	_	_	TerC family protein	_	_	_	0.196428	7.80794	7.76557	7.84579	7.64597	7.66339	7.66135	7.68678	7.35738	7.41606	7.26018	7.38021	7.54908	7.29715	7.12793	7.39456	7.29736	7.41678	7.36444	7.45658	7.63508	7.46457
BP_RS05840	bp1174	_	_	hypothetical protein	Uncharacterized protein	8	_	0.412088	7.68124	7.8139	7.94553	8.41702	8.43523	8.48607	8.70369	8.64787	8.72382	8.59247	8.67509	8.67897	8.72541	8.62988	8.68709	8.71587	8.65124	8.58134	8.67279	8.92722	8.96345
BP_RS05845	bp1175	_	_	NirD/YgiW/YdeI family stress tolerance protein	Putative exported protein	1	B	0.880834	7.99998	8.38859	8.5129	9.68952	9.80304	9.73911	10.3999	10.2171	10.2565	10.3232	10.1471	10.1044	11.3417	10.7547	10.8893	10.8337	10.5744	10.6718	10.8871	10.8578	11.0652
BP_RS05850	bp1176	_	astE	succinylglutamate desuccinylase/aspartoacylase family protein	Putative succinylglutamate desuccinylase (EC 3.1.-.-)	4	A	0.540775	9.85663	9.96389	10.081	10.2238	10.0367	9.92288	9.96808	9.98815	10.063	10.1481	10.2293	10.2332	10.0466	9.89638	9.96207	10.0769	10.0163	10.0725	9.97932	9.69993	9.13888
BP_RS05860	bp1178	_	_	DMT family transporter	Putative membrane protein	4	A	0.729609	8.05584	7.58739	7.62803	6.80113	6.89645	6.81235	7.02106	6.74708	6.56291	6.7403	6.90072	6.62544	6.59866	7.10903	6.67678	7.85742	8.1748	7.27241	6.95578	6.77732	6.51999
BP_RS05865	bp1180	_	_	LysR family transcriptional regulator	LysR-family transcriptional regulator	10	D	0.648292	10.3603	10.2084	10.2748	9.86721	9.54967	9.59422	9.79051	9.511	9.67023	9.45227	9.45605	9.53599	9.86793	10.2296	9.80873	9.60036	9.61774	9.68081	9.43739	9.48324	9.08547
BP_RS05870	bp1181	_	glnQ	amino acid ABC transporter ATP-binding protein	Amino acids ABC transporter, ATP-binding protein	10	D	0.722785	12.2415	11.9725	11.8876	11.983	11.4731	11.4925	11.9917	11.5508	11.5662	11.5381	11.3192	11.6046	12.3258	12.2513	12.086	11.3802	11.2445	11.0749	11.5158	11.0851	10.3551
BP_RS05875	bp1182	_	_	amino acid ABC transporter permease	Amino acids ABC transporter, permease protein	4	A	0.312365	7.75934	7.8867	7.83856	7.48385	7.21781	7.33619	7.53099	7.35914	7.51788	7.34111	7.3773	7.3525	7.46706	7.36233	7.37872	7.2588	6.63935	7.3927	7.05955	6.96146	7.22766
BP_RS05880	bp1183	_	_	amino acid ABC transporter permease	Amino acids ABC transporter, permease protein	_	_	0.249427	8.10314	8.13501	7.9569	7.75274	7.67028	7.58984	7.67799	7.48326	7.67957	7.78077	7.69929	7.59894	7.43418	7.52324	7.40242	7.43131	7.72453	7.57344	6.96615	7.37952	6.98473
BP_RS05885	bp1184	_	_	ABC transporter substrate-binding protein	Probable solute-binding protein	11	_	0.507383	8.09931	8.21408	8.18957	7.5255	7.63552	7.45454	7.29306	7.4979	7.6427	7.83446	7.66968	7.74528	7.55263	7.41735	7.66971	7.52253	7.31855	7.60852	7.26952	7.12012	6.84837
BP_RS05890	bp1185	_	aspC	aminotransferase class I/II-fold pyridoxal phosphate-dependent enzyme	Aminotransferase (EC 2.6.1.-)	4	A	0.798263	8.93198	8.39446	8.48305	8.24479	7.87173	7.81202	7.86284	7.70344	7.84175	7.68911	7.83674	7.85955	8.46311	8.47471	8.13597	7.71335	7.57203	7.63085	7.10449	7.15045	6.80265
BP_RS05895	bp1186	_	_	RraA family protein	Putative aldolase	10	D	0.827922	7.60746	7.15424	7.07163	6.94596	6.7553	6.84353	6.61835	6.61278	6.88464	6.40791	6.81009	6.48281	7.16506	7.78571	7.22768	5.98643	6.35565	5.86365	5.20755	5.75996	5.50029
BP_RS05905	bp1188	_	_	hypothetical protein	Uncharacterized protein	2	B	0.817493	8.44298	8.22397	8.34176	7.81137	7.65647	7.44609	7.82616	7.52445	7.78471	7.91688	7.92903	7.81927	8.08322	8.16309	8.20067	8.29004	8.43633	8.34883	9.04638	8.86583	8.51446
BP_RS05910	bp1188A	_	_	hypothetical protein	Oxidoreductase-like domain-containing protein	9	D	0.626547	6.45925	6.78565	6.89781	7.26935	7.54075	7.56762	7.75879	7.66464	7.61304	7.82394	7.76281	7.63819	8.32867	8.00008	8.2056	7.74696	7.63209	7.78044	8.01653	7.97681	7.95411
BP_RS05915	bp1189	_	_	copper resistance protein NlpE	Lipoprotein	9	D	0.900969	8.83119	9.14465	9.29794	9.74771	10.3589	10.1884	10.428	10.3606	10.4723	10.5983	10.4383	10.3463	11.463	11.3317	11.364	10.8693	10.6506	10.6989	11.1057	11.2842	11.7
BP_RS05920	bp1190	_	_	carboxymuconolactone decarboxylase family protein	CMD domain-containing protein	9	D	0.545797	6.76971	6.3868	5.94081	6.5273	6.19781	6.07116	6.58352	6.35983	5.89808	6.118	6.19147	6.37246	7.15516	7.40902	7.0076	6.65346	6.80506	6.63576	6.4308	6.86913	6.48427
BP_RS05925	bp1191	_	_	sigma-70 family RNA polymerase sigma factor	Putative RNA polymerase sigma factor	4	A	0.529707	8.13704	8.07799	8.00092	7.73455	7.79953	8.04953	7.55815	7.62011	7.65653	7.56492	7.68479	7.52415	7.69318	7.78984	7.76901	7.47744	7.50301	7.27517	7.18689	7.46582	7.13263
BP_RS05930	bp1192	_	_	hypothetical protein	Putative exported protein	3	B	0.46786	8.27083	8.11034	8.16213	8.20658	8.47949	8.74609	8.25014	8.49037	8.49379	8.41913	8.67647	8.38419	9.02333	8.88401	9.05332	8.78508	8.7581	8.61018	8.62308	9.0035	9.30385
BP_RS05935	bp1193	_	_	DUF3820 family protein	Uncharacterized protein	_	_	0.00888399	7.38178	7.63154	7.3462	7.21521	7.18039	7.10219	6.99479	7.17812	7.18499	7.1428	7.10196	7.136	7.15516	7.38505	7.48088	7.19576	7.24493	7.11351	6.95905	7.12677	7.44679
BP_RS05940	bp1194	_	_	NUDIX hydrolase	Nudix hydrolase domain-containing protein	7	A	0.723687	9.72616	9.73886	9.66322	9.89479	9.60562	9.42659	9.47133	9.43476	9.40923	9.53654	9.44601	9.5721	9.5563	9.34686	9.39207	9.28315	9.26057	9.41268	9.11776	8.9587	8.50652
BP_RS05945	bp1195	_	_	2Fe-2S iron-sulfur cluster binding domain-containing protein	Ferredoxin	_	_	0.190026	7.80357	7.48656	7.3513	7.63832	7.22999	7.60069	7.3666	7.2794	7.46644	6.96933	7.15334	7.34611	7.35393	7.37032	7.20974	7.49507	7.18781	7.13979	6.8807	7.23557	7.04837
BP_RS05950	bp1196	_	_	hypothetical protein	Putative exported protein	4	A	0.861961	10.3411	10.2426	10.2416	10.008	9.68273	9.59646	9.68634	9.67401	9.6454	9.68285	9.70702	9.76696	9.66684	9.56213	9.69852	9.2389	9.11814	9.2908	9.03861	9.11601	9.0927
BP_RS05955	bp1197	btr	btr	oxygen-responsive transcriptional regulator Btr	Transcriptional regulatory protein btr	7	A	0.943942	11.9612	12.0148	11.5942	12.2297	12.8695	12.8627	12.0463	12.1791	12.1448	11.5518	11.5481	11.5569	12.5348	12.4861	12.5274	11.5489	11.5998	11.6013	11.2752	11.271	11.0556
BP_RS05960	bp1198	clpB	clpB	ATP-dependent chaperone ClpB	Chaperone protein ClpB	1	B	0.975183	11.516	11.5629	11.4781	12.2427	12.3321	12.391	13.2808	13.2986	13.3563	13.7995	13.7148	13.6104	13.4696	13.3034	13.4887	14.0688	13.8609	14.1132	14.1741	14.1224	14.5407
BP_RS05980	bp1201	tcfA	tcfA	autotransporter TcfA	Tracheal colonization factor	1	B	0.843698	13.9917	14.3889	14.5992	15.1363	15.5637	15.4586	15.7622	15.8366	15.8437	16.2992	16.0886	16.0216	16.1996	15.8628	16.0143	16.1414	16.0629	16.1562	16.3263	16.2005	16.01
BP_RS05985	bp1202	_	_	TetR family transcriptional regulator	TetR-family transcriptional regulator	8	_	0.725454	10.3564	10.7082	10.8994	11.056	11.0559	11.0953	11.5131	11.3876	11.424	11.6817	11.5377	11.4331	11.1111	10.9499	11.0216	11.0261	10.9987	11.2506	11.1438	11.053	10.9945
BP_RS05990	bp1203	_	_	Tm-1-like ATP-binding domain-containing protein	UPF0261 protein BP1203	7	A	0.986981	10.7969	10.9118	11.0716	11.302	11.5503	11.525	11.5625	11.5567	11.6135	11.1684	11.1452	11.1123	9.38364	9.40518	9.39239	9.28758	9.29627	9.47775	9.24716	9.33362	9.65617
BP_RS05995	bp1204	_	_	phosphoenolpyruvate hydrolase family protein	PEP_hydrolase domain-containing protein	7	A	0.984632	9.83863	10.0066	10.2271	11.0217	11.1763	11.0594	11.124	11.2171	11.2455	10.9684	10.9012	10.9222	9.43453	9.16686	9.3392	9.1641	8.97388	9.24445	9.03605	8.99742	9.30385
BP_RS06000	bp1205	_	_	SRPBCC family protein	Uncharacterized protein	4	A	0.969485	9.17116	9.43286	9.48992	10.579	10.6798	10.6759	10.7172	10.7214	10.6269	10.3849	10.4004	10.3587	9.16455	8.99011	9.18215	8.70692	8.83364	9.03071	8.96007	8.98561	9.02047
BP_RS06005	bp1206	_	_	LysR family transcriptional regulator	LysR-family transcriptional regulator	7	A	0.855451	7.79913	8.0485	7.86792	8.51552	8.80615	8.73236	8.69147	8.87887	8.87985	8.32168	8.51088	8.4707	7.92136	7.97133	7.8407	7.78313	7.7648	7.85943	7.50505	7.83789	7.39032
BP_RS06010	bp1207	_	_	N-acyl-D-glutamate deacylase	N-acyl-D-glutamate deacylase (EC 3.5.1.82)	5	C	0.440743	7.88602	7.82329	7.68216	7.77688	8.08517	7.9149	7.79512	7.95063	7.99444	7.61444	7.6323	7.75311	7.37537	7.60852	7.73695	7.98522	8.17076	7.96375	7.66693	8.09116	8.1491
BP_RS06015	bp1208	_	_	tripartite tricarboxylate transporter substrate binding protein BugE	Putative exported protein	5	C	0.767629	7.15587	7.12629	7.09611	7.33993	7.59556	7.33721	7.41161	7.68456	7.55464	7.70454	7.81034	7.73894	6.40162	7.0198	6.70644	7.83333	7.72453	7.54573	7.55625	7.94332	8.38602
BP_RS06020	bp1209	_	_	flavodoxin domain-containing protein	Probable oxidoreductase	5	C	0.801462	5.66811	5.85084	5.81437	6.72904	6.49462	6.09135	6.27465	6.67824	6.67168	6.80142	7.29329	6.78314	5.10507	5.29543	4.92641	6.20557	5.95085	6.01894	6.47703	6.7052	6.38074
BP_RS06025	bp1210	_	apbE	FAD:protein FMN transferase	FAD:protein FMN transferase (EC 2.7.1.180) (Flavin transferase)	8	_	0.895039	5.05231	4.33144	5.15096	6.93842	7.06195	6.77983	7.79729	7.84632	7.55724	7.73446	8.22905	8.02116	5.93106	6.36126	6.57032	7.13566	7	7.1234	8.34507	8.27208	8.41307
BP_RS06030	bp1211	_	_	DUF4198 domain-containing protein	Putative exported protein	8	_	0.94654	6.16394	5.64013	5.9851	7.76572	8.16395	7.95678	8.8262	9.00086	8.66913	9.1739	9.30635	9.07203	8.55492	8.29502	8.5746	8.50216	8.53086	8.47806	10.1346	10.1679	10.0896
BP_RS06035	bp1212	_	_	DUF2271 domain-containing protein	Putative exported protein	1	B	0.929864	5.41342	5.37599	5.77288	7.71024	7.84475	7.83314	8.42258	8.74959	8.3781	8.75134	8.96503	8.72651	7.47269	7.61183	7.67316	7.67103	8.06578	8.02656	9.45911	9.30983	9.37976
BP_RS06040	bp1213	_	_	PepSY-associated TM helix domain-containing protein	Putative membrane protein	8	_	0.512125	6.21074	5.99692	5.73124	7.57273	6.76108	6.10669	7.91491	7.9052	7.40533	8.01323	7.9803	7.69377	6.98649	7.96298	7.3627	7.58247	8.34955	7.45761	8.33834	8.13489	7.55498
BP_RS06045	bp1214	_	nodI	ATP-binding cassette domain-containing protein	ABC, transporter, ATP-binding protein	8	_	0.382661	8.76275	8.56926	8.57521	8.99679	8.9166	8.90972	8.94255	9.15438	8.92715	9.05907	9.1136	9.02069	8.76861	8.65912	8.67599	8.92067	8.86079	8.85379	9.15691	8.89703	8.73951
BP_RS06050	bp1215	_	nodJ	ABC transporter permease	Transport permease protein	_	_	0.167186	7.16066	7.05864	6.88755	7.502	7.54071	7.1359	7.39863	7.30184	7.2809	7.32033	7.32778	7.48033	7.13511	7.10104	7.03839	7.08791	6.96306	7.18298	7.18721	7.45792	7.18205
BP_RS06055	bp1216	_	_	HdeD family acid-resistance protein	Putative membrane protein	3	B	0.870631	8.58734	8.61897	8.64975	8.98043	9.06002	9.01589	8.8464	8.83716	8.94161	8.86346	8.83366	8.93454	9.38565	9.23844	9.24977	9.59104	9.54927	9.50497	9.8128	10.1739	10.8354
BP_RS06060	bp1217	crcB	crcB	fluoride efflux transporter CrcB	Putative fluoride ion transporter CrcB	3	B	0.816597	7.83433	7.86688	7.84829	8.25444	8.33375	8.16893	8.08931	8.30093	8.29425	8.17995	8.15331	8.27303	8.54741	8.52995	8.35982	8.93095	8.87662	8.70497	8.91388	9.10769	9.55961
BP_RS06065	bp1218	_	_	FAD-dependent oxidoreductase	Putative exported protein	4	A	0.761403	10.6218	10.5058	10.5252	10.0073	10.0442	10.0718	9.85105	10.0427	10.0114	9.83389	9.94592	10.0511	9.65171	9.75098	9.70093	9.50195	9.59529	9.72428	9.4955	9.31525	9.28502
BP_RS06070	bp1219	hpnD	_	presqualene diphosphate synthase HpnD	Putative phytoene synthase	4	A	0.812172	10.6643	10.6847	10.5841	10.1634	9.76338	9.72322	9.83005	9.77448	9.77655	9.9045	9.87407	9.87509	9.87897	9.56435	9.63987	9.43299	9.43203	9.47985	9.33319	8.80601	8.68135
BP_RS06075	bp1220	hpnC	_	squalene synthase HpnC	Putative phytoene synthase	7	A	0.597933	10.3829	10.3914	10.4731	9.66747	9.30568	9.1929	9.49588	9.21306	9.27273	9.41192	9.39055	9.31883	9.34143	9.20461	9.33778	9.04423	8.89142	9.09228	9.07753	8.81635	8.9138
BP_RS06080	bp1221	alr	dadX	alanine racemase	Alanine racemase (EC 5.1.1.1)	4	A	0.516218	10.0262	10.0046	10.0263	9.96605	9.98137	10.0173	10.1335	10.0427	10.0206	9.81602	10.0258	9.93618	9.7098	9.80136	9.71751	9.87081	10.0044	10.009	9.82205	9.94283	9.99506
BP_RS06085	bp1222	_	_	SDR family oxidoreductase	Probable short-chain dehydrogenase	3	B	0.433315	9.54777	9.38993	9.49304	9.40352	9.39984	9.55165	9.4785	9.57042	9.62282	9.40697	9.50065	9.39996	9.9495	9.89499	9.85414	9.85986	9.74424	9.56921	9.93265	9.96919	9.30073
BP_RS06090	bp1223	_	_	membrane protein	Putative membrane protein	1	B	0.679847	8.12532	8.21035	8.1534	8.8963	8.99255	9.04558	8.78641	8.82499	8.86842	8.68424	9.04868	9.02011	8.85605	9.00414	9.10112	9.37882	9.28322	9.16116	9.31183	9.22317	9.04643
BP_RS06100	bp1225	_	_	RNA polymerase sigma factor	Putative Ecf-type RNA polymerase sigma factor	4	A	0.488959	9.82167	9.5766	9.65772	9.4369	8.72411	8.64128	8.96032	8.87763	8.84845	9.00994	8.83358	8.91217	8.60489	8.90148	8.59442	8.70522	8.7448	8.70195	8.57774	8.31734	7.77833
BP_RS06105	bp1226	_	_	VWA domain-containing protein	_	4	A	0.386465	6.24998	5.63343	6.0841	5.81912	6.13662	5.80575	5.35178	5.96249	5.49876	5.69724	5.48653	5.43508	5.43571	5.61391	5.66184	5.42845	5.08416	5.09821	5.05988	4.90244	4.93328
BP_RS06110	bp1227	radA	radA	DNA repair protein RadA	DNA repair protein RadA	4	A	0.892928	10.2378	10.3388	10.1983	9.99285	9.91442	9.88883	9.86128	9.81023	9.83691	9.81246	9.89734	9.82673	9.55562	9.53167	9.56657	9.40624	9.40183	9.46729	9.35561	9.17679	9.11266
BP_RS06115	bp1228	_	_	sulfite exporter TauE/SafE family protein	Probable membrane transporter protein	10	D	0.82896	9.78471	9.79983	9.71734	8.8502	8.75331	8.83624	9.01125	8.67416	8.60072	8.34387	8.43091	8.48185	9.35247	9.65734	9.4175	8.35258	8.94965	8.47561	8.14118	8.07931	7.60874
BP_RS06120	bp1229	_	_	hypothetical protein	Putative exported protein	2	B	0.87986	8.42966	8.53801	8.45382	8.59713	8.91494	9.1248	8.27615	8.26679	8.33793	8.19602	8.24303	8.41361	8.72332	8.69657	8.72413	8.79962	8.73649	8.66762	9.27463	9.61524	9.94513
BP_RS06125	bp1230	_	norM	MATE family efflux transporter	Multidrug resistance protein	4	A	0.674617	9.97331	9.98779	9.77221	9.22175	8.96253	9.04371	8.79785	8.52688	8.55393	8.51951	8.44606	8.64452	8.96244	9.16996	8.98431	8.42986	8.90949	8.4535	8.47944	8.45681	8.45393
BP_RS06130	bp1231	_	_	membrane protein	Putative membrane protein	4	A	0.824177	10.9224	10.9068	10.907	10.2129	10.0456	9.98224	10.193	10.2153	10.1233	9.82027	9.92618	10.0009	9.87334	9.84857	9.87829	9.65955	9.63105	9.60833	9.42082	9.41752	9.50708
BP_RS06135	bp1232	_	rpmE2	type B 50S ribosomal protein L31	50S ribosomal protein L31 type B	7	A	0.758964	12.598	12.6961	12.7308	12.2125	12.0134	12.1796	11.8846	12.0998	12.3496	12.9156	12.9313	12.9424	12.0411	11.9923	12.0628	11.6086	11.5497	11.5512	11.8272	11.2269	10.029
BP_RS06140	bp1233	kynA	kynA	tryptophan 2%2C3-dioxygenase	Tryptophan 2,3-dioxygenase (TDO) (EC 1.13.11.11) (Tryptamin 2,3-dioxygenase) (Tryptophan oxygenase) (TO) (TRPO) (Tryptophan pyrrolase) (Tryptophanase)	2	B	0.621513	9.62865	9.66061	9.71091	10.5157	10.1254	10.236	10.3021	10.1928	10.195	10.1899	10.1418	10.3151	10.2407	10.2548	10.2791	10.5603	10.3275	10.5851	10.5652	10.5436	11.0034
BP_RS06145	bp1234	kynB	kynB	arylformamidase	Kynurenine formamidase (KFA) (KFase) (EC 3.5.1.9) (Arylformamidase) (N-formylkynurenine formamidase) (FKF)	9	D	0.57256	9.76246	9.73281	9.60881	10.1061	10.2782	10.1893	10.1444	10.0751	10.1543	10.1403	10.1454	10.2321	10.1991	10.4983	10.5003	10.4697	10.4431	10.4812	10.4043	10.4685	11.0054
BP_RS06150	bp1235	radC	_	DNA repair protein RadC	UPF0758 protein BP1235	12	_	0.332364	5.37998	4.94483	5.23125	5.42765	5.39769	4.72677	5.04538	5.18873	5.13473	5.23347	5.63531	5.20289	5.64753	5.48721	5.78718	5.42845	5.91708	5.56541	5.0677	5.69704	4.59818
BP_RS06155	bp1236	_	fkpB	FKBP-type peptidyl-prolyl cis-trans isomerase	Peptidyl-prolyl cis-trans isomerase (EC 5.2.1.8)	4	A	0.814872	10.116	10.1085	10.2435	9.79271	9.94948	9.915	9.48087	9.52421	9.58992	9.69608	9.66851	9.71539	9.57011	9.59079	9.75789	9.39861	9.32567	9.3661	9.35807	9.24521	8.8117
BP_RS06160	bp1237	ispH	ispH, lytB	4-hydroxy-3-methylbut-2-enyl diphosphate reductase	4-hydroxy-3-methylbut-2-enyl diphosphate reductase (HMBPP reductase) (EC 1.17.7.4)	10	D	0.580946	11.1478	11.0932	11.0531	11.1458	11.1631	11.2103	10.9052	11.1025	11.0221	11.1806	11.0905	11.1068	11.2404	11.2157	11.2605	10.8926	10.8691	11.0713	10.9676	10.8884	10.4453
BP_RS06165	bp1238	maiA	_	maleylacetoacetate isomerase	Putative glutathione-S-transferase	3	B	0.715266	9.0836	9.24442	9.22698	9.2877	9.45174	9.65524	9.53517	9.48279	9.56275	9.48356	9.45864	9.44019	9.52959	9.63641	9.69611	9.81884	9.83709	9.80075	9.96839	9.93441	10.6024
BP_RS06180	bp1239	_	_	cupin domain-containing protein	Uncharacterized protein	_	_	0.111359	8.88271	8.88991	8.90247	8.46528	8.20768	8.44787	8.21348	8.37309	8.36811	8.16676	8.44438	8.48185	8.46699	8.43614	8.47841	8.45233	8.36024	8.43979	8.36027	8.561	8.86127
BP_RS06185	bp1240	_	_	GTP-binding protein	CobW C-terminal domain-containing protein	4	A	0.953726	13.419	13.6763	13.6792	14.4011	14.6403	14.5703	14.0815	14.1572	14.1142	14.3249	14.1112	14.0771	13.9611	13.838	13.9259	13.2965	13.1451	13.3343	12.9434	12.9322	13.3794
BP_RS06190	bp1241	_	_	malonic semialdehyde reductase	Nitroreductase domain-containing protein	11	_	0.916474	16.1265	16.0395	16.1375	17.0095	17.0607	17.1043	16.6745	16.6566	16.73	16.7416	16.732	16.8407	16.7702	16.8706	16.8685	16.1168	15.9064	16.1127	15.8036	15.879	16.3892
BP_RS06195	bp1242	_	_	LysR family transcriptional regulator	Probable LysR-family transcriptional regulator	5	C	0.85402	9.69897	9.79913	9.83473	10.127	10.3287	10.2934	10.2663	10.3535	10.4044	10.09	10.2455	10.1575	10.1253	10.2305	10.1204	10.5595	10.5327	10.5779	10.7172	10.8141	10.9038
BP_RS06210	bp1243	scpB	_	SMC-Scp complex subunit ScpB	Uncharacterized protein	10	D	0.958178	13.0972	12.8122	12.6427	11.84	11.6502	11.6399	11.9188	11.878	11.8549	12.2566	12.1593	12.2521	13.2414	13.2176	13.1658	11.898	11.9895	11.9835	11.9691	11.6629	11.2738
BP_RS06215	bp1244	_	_	rRNA pseudouridine synthase	Pseudouridine synthase (EC 5.4.99.-)	10	D	0.944545	12.702	12.4618	12.2997	11.076	11.2981	11.2879	11.3372	11.444	11.4074	11.5936	11.5871	11.5608	12.2908	12.1093	12.274	11.0909	11.1885	11.3179	11.1716	11.0688	10.7154
BP_RS06220	bp1245	rimP	rimP	ribosome maturation factor RimP	Ribosome maturation factor RimP	7	A	0.745511	12.8884	12.7336	12.6917	12.2819	11.8149	11.8596	12.0583	12.1292	12.0379	12.3536	12.333	12.4156	12.1832	12.0728	12.1371	11.2628	11.1142	11.2933	11.4293	10.5194	8.96446
BP_RS06225	bp1246	nusA	nusA	transcription termination/antitermination protein NusA	Transcription termination/antitermination protein NusA	4	A	0.847328	14.5451	14.4528	14.3823	13.8643	13.8221	13.894	14.2827	14.0842	14.0261	14.1103	14.0574	14.0875	13.9225	13.8323	14.0362	13.0377	12.9004	13.2579	13.2437	12.7168	11.8717
BP_RS06230	bp1247	infB	infB	translation initiation factor IF-2	Translation initiation factor IF-2	4	A	0.940295	15.3749	15.3061	15.2693	14.6665	14.5668	14.57	14.5485	14.5527	14.4994	14.5799	14.5587	14.5263	14.2701	14.2819	14.3964	13.6495	13.6488	13.9411	13.7221	13.5599	13.1857
BP_RS06235	bp1248	rbfA	rbfA	30S ribosome-binding factor RbfA	Ribosome-binding factor A	4	A	0.937169	11.439	11.2784	11.1702	10.4425	10.3218	10.3638	10.1402	10.2412	10.1722	10.1914	10.1741	10.2054	9.87334	9.59949	9.81641	9.03937	8.97674	9.18564	9.17738	9.08436	9.34382
BP_RS06240	bp1249	truB	truB	tRNA pseudouridine(55) synthase TruB	tRNA pseudouridine synthase B (EC 5.4.99.25) (tRNA pseudouridine(55) synthase) (Psi55 synthase) (tRNA pseudouridylate synthase) (tRNA-uridine isomerase)	4	A	0.935895	12.0643	11.8336	11.741	10.7348	10.0246	10.0625	9.98516	9.88847	9.65748	9.81432	9.88398	9.83762	8.81747	8.728	8.8756	8.24953	8.42279	8.69608	8.23506	7.89508	7.92934
BP_RS06245	bp1250	typA	typA, bipA	translational GTPase TypA	50S ribosomal subunit assembly factor BipA (EC 3.6.5.-) (GTP-binding protein BipA)	4	A	0.967251	13.5239	13.5098	13.3733	12.3047	12.3197	12.3122	11.8588	12.0493	12.0153	12.1895	12.0615	11.9676	11.4555	11.2768	11.4324	10.6902	10.622	10.9107	10.9269	10.7669	10.5865
BP_RS06250	bp1251	_	_	toxin	Putative toxin	4	A	0.706896	12.1612	12.1635	12.079	11.7382	11.7632	11.8156	11.8934	11.8824	11.8365	11.8957	11.9279	11.9627	11.6081	11.5977	11.6937	11.6685	11.4552	11.692	11.5583	11.3134	10.7256
BP_RS06255	bp1252	_	_	hypothetical protein	Putative exported protein	7	A	0.565184	11.7652	11.7496	11.76	11.3252	10.7744	10.7091	10.8921	10.8558	10.984	11.2727	11.2143	11.2385	11.0269	10.8537	10.9431	10.967	10.7764	10.9226	10.8152	10.3008	9.38331
BP_RS06260	bp1253	_	_	TIGR00730 family Rossman fold protein	Cytokinin riboside 5'-monophosphate phosphoribohydrolase (EC 3.2.2.n1)	6	_	0.461751	11.2425	11.4465	11.3554	11.6491	11.7507	11.7478	11.7416	11.7445	11.7693	11.7268	11.5837	11.6526	11.683	11.654	11.598	11.8043	11.6465	11.8935	11.8259	11.8117	12.2406
BP_RS06265	bp1254	polA	polA	DNA polymerase I	DNA polymerase I (EC 2.7.7.7)	11	_	0.858141	12.4991	12.528	12.5891	12.5943	12.5804	12.5533	12.4812	12.4997	12.4638	12.5979	12.5775	12.5286	12.025	11.9522	12.0447	12.4725	12.3876	12.5818	12.3369	12.2496	11.9854
BP_RS06270	bp1255	_	_	ZIP family metal transporter	Putative membrane protein	10	D	0.871736	11.2871	11.1059	11.1453	10.5457	10.4757	10.5852	11.348	11.2299	11.2227	11.3556	11.5037	11.4402	11.5872	11.6099	11.668	11.0998	11.0814	11.0126	11.1361	11.0128	10.4067
BP_RS06275	bp1256	_	_	dienelactone hydrolase family protein	Putative carboxymethylenebutenolidase (EC 3.1.1.45)	1	B	0.936682	8.84343	8.81574	8.80602	9.06543	9.13908	9.1247	9.38315	9.37073	9.50801	9.61276	9.73688	9.53976	10.3984	10.2747	10.3045	9.99974	9.85549	9.77413	10.0243	10.1222	10.3807
BP_RS06280	bp1257	_	_	Na/Pi cotransporter family protein	Putative membrane protein	8	_	0.433709	9.77234	9.75718	9.81924	10.1181	10.1583	10.2149	10.1549	10.1613	10.1018	9.98618	10.0296	10.1276	9.99746	10.0083	10.05	10.0618	10.0842	10.0695	9.97418	9.79798	9.78907
BP_RS06285	bp1258	_	sdaA	L-serine ammonia-lyase	L-serine dehydratase (EC 4.3.1.17)	3	B	0.764756	10.2913	10.3906	10.3836	10.6038	10.5816	10.4613	10.5114	10.511	10.4711	10.4285	10.3488	10.3684	10.6395	10.6951	10.7345	10.684	10.775	10.7794	10.6999	10.862	11.0798
BP_RS06290	bp1259	_	queH	epoxyqueuosine reductase QueH	Epoxyqueuosine reductase QueH (EC 1.17.99.6) (Queuosine biosynthesis protein QueH)	9	D	0.843997	12.0072	12.1024	12.1267	12.3042	12.4041	12.3839	12.1399	12.2909	12.3513	12.5935	12.5408	12.556	13.068	12.978	13.0852	12.4245	12.2165	12.4062	12.351	12.1943	11.7298
BP_RS06295	bp1260	glnE	glnE	bifunctional [glutamate--ammonia ligase]-adenylyl-L-tyrosine phosphorylase/[glutamate--ammonia-ligase] adenylyltransferase	Bifunctional glutamine synthetase adenylyltransferase/adenylyl-removing enzyme (ATP:glutamine synthetase adenylyltransferase) (ATase) [Includes: Glutamine synthetase adenylyl-L-tyrosine phosphorylase (EC 2.7.7.89) (Adenylyl removase) (AR) (AT-N); Glutamine synthetase adenylyl transferase (EC 2.7.7.42) (Adenylyl transferase) (AT) (AT-C)]	11	_	0.499983	10.6145	10.6044	10.6022	10.9867	11.0142	10.9819	10.6944	10.7776	10.7991	10.5407	10.6348	10.6218	10.6987	10.6796	10.6281	10.8319	10.8135	10.9726	10.718	10.8195	11.4397
BP_RS06300	bp1261	_	_	TIGR02099 family protein	_	4	A	0.61751	10.1273	9.98437	9.9979	9.52096	9.24591	9.32631	9.12723	9.15904	9.28132	9.12688	9.27735	9.2707	9.26192	9.55184	9.20659	9.05699	9.23501	9.29683	8.80836	9.0025	8.76073
BP_RS06305	bp1262	rho	rho	transcription termination factor Rho	Transcription termination factor Rho (EC 3.6.4.-) (ATP-dependent helicase Rho)	4	A	0.816966	14.0693	14.0531	14.0094	13.677	13.2959	13.3076	12.9886	13.185	13.2292	13.4737	13.4449	13.464	12.8587	12.7564	12.8903	12.6552	12.5456	12.7468	12.6402	12.176	11.4094
BP_RS06310	bp1263	trxA	trxA	thioredoxin TrxA	Thioredoxin 1	9	D	0.775072	12.6644	12.6539	12.6757	12.7233	13.0755	13.1529	12.8233	12.8012	13.0171	13.1254	13.1442	13.2046	13.3552	13.3154	13.4466	12.9261	12.9687	12.9857	12.8585	12.6501	12.3782
BP_RS06315	bp1264	_	parE	type IIA DNA topoisomerase subunit B	DNA topoisomerase 4 subunit B (EC 5.6.2.2) (Topoisomerase IV subunit B)	4	A	0.753243	11.9661	12.0914	12.2289	12.0308	12.1681	12.1559	12.2268	12.1644	12.206	12.3586	12.2222	12.2558	12.1285	11.9199	12.026	11.9367	11.796	11.9764	11.9628	11.7564	11.4489
BP_RS06320	bp1265	_	_	YcxB family protein	Putative membrane protein	7	A	0.871035	9.45433	9.52506	9.50545	9.25935	9.05023	9.13932	9.17649	9.14271	9.163	9.17271	9.18137	9.27458	8.52972	8.45128	8.51873	8.36401	8.32428	8.56468	8.18611	7.96127	7.66998
BP_RS06325	bp1266	parC	parC	DNA topoisomerase IV subunit A	DNA topoisomerase 4 subunit A (EC 5.6.2.2) (Topoisomerase IV subunit A)	4	A	0.928759	11.5926	11.7496	11.8274	11.7594	11.8496	11.7811	11.7274	11.8245	11.7771	11.9032	11.8127	11.7117	11.4417	11.3695	11.4983	11.3137	11.2637	11.3945	11.2914	11.1752	11.2521
BP_RS06330	bp1267	_	_	DUF418 domain-containing protein	Putative membrane protein	4	A	0.863385	8.49455	8.41242	8.397	8.12027	8.05947	8.22293	8.13739	7.93941	7.79058	7.47748	7.68619	7.78046	7.33277	7.36068	7.25397	7.28388	7.00785	7.08415	6.49152	6.62277	6.41353
BP_RS06340	bp1269	_	_	DMT family transporter	_	_	_	0.225381	6.01306	6.11909	6.06877	6.32231	6.30686	6.70724	6.18328	5.97536	6.20749	5.39216	6.31734	5.76258	5.83348	5.45744	5.73834	5.77437	6.10517	6.03333	5.56956	5.69704	5.43362
BP_RS06345	bp1270	_	_	glutathione S-transferase	Putative glutathione S-transferase (EC 2.5.1.18)	_	_	0.0486031	4.69256	4.23357	3.57706	3.02785	2.76957	3.61098	2.50757	2.70743	3.33024	3.20723	3.77223	2.73226	3.39885	3.71535	4.02375	3.17872	3.6235	2.99281	3.18412	2.98875	2.74663
BP_RS06350	bp1271	_	_	PQQ-dependent sugar dehydrogenase	_	_	_	0.0697732	7.05538	6.73472	6.87886	5.62546	5.39769	5.20234	5.58094	5.05604	4.77871	4.86078	5.21107	4.90239	5.49917	5.61391	5.15763	5.05398	5.83899	5.25252	4.77538	5.67872	5.36137
BP_RS06355	bp1272	_	_	aspartate/glutamate racemase family protein	_	7	A	0.730232	7.31526	7.18166	7.83617	6.88472	6.95079	6.87027	6.79618	6.72109	6.83647	6.57899	6.6	6.75828	5.56603	5.26072	5.02806	5.86296	5.91708	5.74384	6.2512	6.66674	5.78814
BP_RS06360	bp1273	_	livF	ABC transporter ATP-binding protein	High-affinity branched-chain amino acid transport, ATP-binding protein	5	C	0.96613	9.63028	9.76739	10.0799	9.7217	9.73914	9.67318	9.57252	9.71416	9.64036	9.7927	9.69414	9.67882	8.40043	8.0559	8.23912	9.11403	9.23949	9.14513	10.0655	10.1459	10.1875
BP_RS06365	bp1274	livG	livG	high-affinity branched-chain amino acid ABC transporter ATP-binding protein LivG	High-affinity branched-chain amino acid transport, ATP-binding protein	4	A	0.973245	10.7328	10.7773	11.0061	10.8146	10.5546	10.5222	10.5855	10.6422	10.5627	10.7023	10.5301	10.5485	8.93857	8.7799	8.88404	9.83448	9.68167	9.89143	10.8305	10.6209	10.8332
BP_RS06370	bp1275	_	livM	high-affinity branched-chain amino acid ABC transporter permease LivM	High-affinity branched-chain amino acid transport system, permease protein	7	A	0.961198	10.0289	9.76886	10.1785	9.78767	9.53519	9.53675	9.7056	9.52853	9.50757	9.75133	9.47348	9.61264	7.84639	7.6319	8.13125	8.78867	8.72262	8.90831	9.75943	9.49692	9.83105
BP_RS06375	bp1276	livH	livH	high-affinity branched-chain amino acid ABC transporter permease LivH	High-affinity branched-chain amino acid transport system, permease protein	5	C	0.973203	9.84596	9.94062	10.0882	10.0473	10.1907	10.1524	10.0878	10.1401	10.2002	10.33	10.2453	10.2138	9.10954	8.92323	9.12155	9.74853	9.84918	9.69568	10.7407	10.7009	10.8518
BP_RS06380	bp1277	_	livJ	branched-chain amino acid ABC transporter substrate-binding protein	Leu/ile/val-binding protein	5	C	0.949079	11.5448	11.7528	11.8356	11.5613	12.2192	12.127	12.2093	12.2506	12.322	12.4954	12.2838	12.3646	11.5775	11.404	11.5967	12.2871	12.2767	12.1987	13.3516	13.3497	13.6961
BP_RS06390	bp1279	_	_	queuosine precursor transporter	Probable queuosine precursor transporter (Q precursor transporter)	4	A	0.921425	11.1379	11.0234	10.9576	10.4889	10.4271	10.4067	10.3109	10.3514	10.2655	10.2264	10.3411	10.3119	10.4939	10.3786	10.4653	9.7753	9.76974	9.82231	9.59805	9.55795	9.65861
BP_RS06395	bp1280	_	proC	pyrroline-5-carboxylate reductase	Pyrroline-5-carboxylate reductase (P5C reductase) (P5CR) (EC 1.5.1.2) (PCA reductase)	4	A	0.800553	10.4267	10.5561	10.5212	10.3131	10.5114	10.4578	10.2246	10.4064	10.3987	10.3555	10.3779	10.2562	10.3094	10.0694	10.3036	9.86665	9.96361	9.86198	9.93365	10.0579	10.038
BP_RS06400	bp1281	ugpB	ugpB	sn-glycerol-3-phosphate ABC transporter substrate-binding protein UgpB	Glycerol-3-phosphate-binding periplasmic protein	5	C	0.877252	11.2272	11.4651	11.4807	11.8732	12.1913	12.1502	12.0523	12.324	12.2201	12.4704	12.4033	12.3655	11.7706	11.6421	11.7116	12.5298	12.4491	12.4656	12.713	12.8182	13.5269
BP_RS06405	bp1282	ugpA	ugpA	sn-glycerol-3-phosphate ABC transporter permease UgpA	sn-glycerol-3-phosphate transport system, permease protein	5	C	0.863389	9.79693	9.71859	9.79135	9.82477	9.59669	9.67132	9.83428	9.80806	9.74593	9.65424	9.84844	9.86191	8.75976	8.89522	8.82944	9.61883	9.55086	9.56848	9.65312	9.55724	10.1001
BP_RS06410	bp1283	ugpE	ugpE	sn-glycerol-3-phosphate ABC transporter permease UgpE	sn-glycerol-3-phosphate transport system permease protein UgpE	5	C	0.842216	9.89453	9.79691	9.76222	9.9881	9.77163	10.0146	10.22	10.2566	10.2064	10.2156	10.2441	10.209	9.30257	9.42828	9.29832	9.96744	9.72368	10.009	10.0532	10.0673	10.5566
BP_RS06415	bp1284	_	ugpC	sn-glycerol-3-phosphate import ATP-binding protein UgpC	sn-glycerol-3-phosphate import ATP-binding protein UgpC (EC 7.6.2.10)	5	C	0.880893	9.7078	9.78127	9.83284	9.9121	9.99888	10.0852	10.2061	10.2136	10.2424	10.1226	10.2754	10.0074	9.41561	9.27812	9.43776	10.1151	10.2402	10.2751	10.0516	9.98738	10.3288
BP_RS06420	bp1285	_	livJ	branched-chain amino acid ABC transporter substrate-binding protein	Leu/ile/val-binding protein	3	B	0.953956	12.1702	12.3341	12.3632	12.568	12.9492	12.9338	12.9518	13.1732	13.1731	13.4142	13.2873	13.1694	12.8507	12.744	12.7991	13.9145	13.6802	13.7923	14.0206	14.06	14.2452
BP_RS06425	bp1286	_	_	alpha/beta hydrolase	Uncharacterized protein	9	D	0.829485	6.82921	7.09682	6.59639	7.04975	7.07508	7.16912	7.1907	7.21569	7.45865	7.16925	7.34702	7.25186	8.18947	8.08589	7.88311	7.81679	7.98056	7.87787	7.19827	7.30613	6.77503
BP_RS06435	bp1288	_	_	EamA/RhaT family transporter	_	_	_	0.0193986	5.06295	5.52662	5.42665	5.33477	5.54172	5.47688	5.30978	5.77315	5.65512	5.17471	5.59883	5.30531	5.61347	5.3948	5.61088	5.9053	5.90812	5.74082	5.49314	5.67872	5.3057
BP_RS06440	bp1289	_	_	DUF423 domain-containing protein	Putative membrane protein	_	_	0.0171058	6.53446	6.81591	6.72467	6.83393	7.14673	7.03393	6.76065	6.77857	7.09099	6.88229	6.90278	7.10091	7.26456	6.85569	7.16934	6.90731	7.25401	7.00777	6.836	6.96437	6.38074
BP_RS06445	bp1290	_	_	DUF2384 domain-containing protein	DUF2384 domain-containing protein	1	B	0.361823	8.99327	9.00101	8.97376	9.11058	9.83569	10.0439	9.49639	9.78824	9.54407	9.21719	9.44795	9.29619	10.03	9.83997	10.1934	9.71512	9.78977	9.76785	9.81079	9.99884	10.8946
BP_RS06450	bp1291	_	_	RES family NAD+ phosphorylase	RES domain-containing protein	8	_	0.494743	7.84843	7.99913	7.81161	8.47982	8.72012	8.74686	8.20754	8.38643	8.5697	8.29147	8.47968	8.41209	8.71333	8.74653	8.90632	8.37158	8.5277	8.47118	8.27277	8.55322	8.64675
BP_RS06455	bp1292	_	_	MetQ/NlpA family ABC transporter substrate-binding protein	Putative exported protein	12	_	0.867219	8.39307	8.13893	8.19082	8.62089	8.63174	8.81486	8.50008	8.38291	8.61878	8.24545	8.32328	8.30887	9.05857	9.30246	9.31425	8.83747	8.99381	8.921	8.83809	8.79773	8.87915
BP_RS06460	bp1293	_	lldD	alpha-hydroxy-acid oxidizing protein	Putative L-lactate dehydrogenase (EC 1.1.2.3)	11	_	0.330063	8.0066	7.77566	7.91623	7.36784	7.27549	7.56834	7.29306	7.39073	7.18274	7.20646	7.23785	7.23877	7.60497	7.7951	7.61969	7.57594	7.63796	7.33138	7.14697	7.29888	7.2377
BP_RS06465	bp1294	psd	psd	phosphatidylserine decarboxylase	Phosphatidylserine decarboxylase proenzyme (EC 4.1.1.65) [Cleaved into: Phosphatidylserine decarboxylase alpha chain; Phosphatidylserine decarboxylase beta chain]	4	A	0.73658	10.6222	10.5261	10.4732	10.1366	9.71187	9.65283	9.76374	9.6828	9.62564	9.6873	9.84787	9.84412	9.77761	9.66233	9.90191	9.322	9.07984	9.37492	9.34006	9.01203	8.0845
BP_RS06470	bp1295	_	_	hypothetical protein	Uncharacterized protein	_	_	0.000905868	6.181	6.3547	6.55813	7.00021	6.61168	6.64006	7.03401	6.67824	6.47464	6.95071	6.49803	6.65431	6.89651	6.75899	6.77145	6.86131	6.65484	6.69109	6.68336	6.77166	6.7669
BP_RS06475	bp1296	_	_	DUF3298 domain-containing protein	Putative lipoprotein	1	B	0.788373	9.31211	9.47498	9.59525	10.4986	10.4726	10.5074	10.4954	10.5713	10.6673	10.7246	10.7237	10.5951	10.8377	10.9639	11.0662	10.8145	10.7536	10.927	11.0078	11.1372	11.4496
BP_RS06480	bp1297	_	_	lipoate--protein ligase family protein	Putative lipoate-protein ligase A	8	_	0.298127	9.47428	9.52669	9.51928	10.0705	9.83758	9.94846	10.3105	10.0608	10.0376	9.98286	9.91363	9.9899	9.87693	10.277	10.1671	10.1932	10.0643	10.3707	10.1419	10.1117	10.0888
BP_RS19585	bp1298	_	_	hypothetical protein	Uncharacterized protein	3	B	0.431717	7.14965	7.20568	7.30509	7.67245	7.56338	7.53871	7.57598	7.52944	7.64601	7.62897	7.5868	7.76414	7.9046	7.68903	7.87867	7.90584	7.88535	7.93156	8.08292	7.99	7.95411
BP_RS06490	bp1299	_	_	GNAT family N-acetyltransferase	Putative acetyltransferase	3	B	0.364047	7.65896	7.19889	7.516	7.52016	7.95846	7.85497	7.79052	7.76599	7.8314	7.70085	8.04418	7.97303	8.07072	8.03511	8.17128	8.27508	8.06578	8.34507	7.97074	8.43769	8.19139
BP_RS06495	bp1300	_	_	glutathione S-transferase N-terminal domain-containing protein	Putative glutathione transferase (EC 2.5.1.18)	1	B	0.86688	9.68271	9.55448	9.60393	10.0741	10.3567	10.4115	10.1738	10.5372	10.5969	10.4591	10.4491	10.4465	10.6775	10.9736	10.95	10.8806	10.6988	10.8498	11.147	11.2009	11.5521
BP_RS06500	bp1301	_	_	glutathione peroxidase	Glutathione peroxidase	2	B	0.866756	8.46102	8.45714	8.38614	8.63581	8.81106	9.00239	9.11074	9.03014	8.9363	8.59941	8.58304	8.74051	9.39319	9.49885	9.63699	9.69813	9.63105	9.55303	9.77546	10.163	10.9637
BP_RS06505	bp1302	_	_	DUF1501 domain-containing protein	Putative exported protein	3	B	0.900553	7.71795	7.79177	7.94281	8.15861	8.14163	8.17426	7.82616	8.03797	8.18082	7.92027	8.0555	8.00236	8.85605	8.69531	8.8671	8.76555	8.837	8.68257	8.74639	8.81271	9.03487
BP_RS06510	bp1303	_	_	DUF1800 domain-containing protein	_	3	B	0.717357	7.95097	8.0146	7.98266	8.25016	7.89852	8.02305	8.12956	8.03215	7.87382	7.70977	7.80365	8.02116	8.37006	8.68226	8.46429	8.55983	8.41255	8.43979	8.62504	8.46155	8.49515
BP_RS06515	bp1304	_	_	tetratricopeptide repeat protein	Uncharacterized protein	3	B	0.683133	6.09416	6.09036	6.07036	6.86282	7.34499	7.40494	6.95447	7.05855	7.2463	6.64592	6.70396	7.13177	7.47269	7.23687	7.57227	7.36444	7.65482	7.37003	7.67298	7.88425	8.13833
BP_RS06520	bp1305	_	_	CoA transferase	Uncharacterized protein	12	_	0.942909	11.3194	11.3429	11.4034	11.5672	11.6646	11.5726	11.4556	11.3641	11.3719	11.2367	11.1659	11.2148	12.0716	11.9888	12.0698	11.5577	11.5019	11.5072	11.7742	11.8388	12.0552
BP_RS06525	bp1306	arsC	arsC	arsenate reductase (glutaredoxin)	Arsenate reductase (EC 1.20.4.1)	3	B	0.836135	8.52088	8.88213	8.87443	9.30882	9.57728	9.64085	9.44251	9.46972	9.46206	9.44567	9.60302	9.56316	9.98449	9.91478	9.91857	9.80158	9.69299	9.86437	10.2092	10.2291	10.0787
BP_RS06530	bp1307	_	_	peroxiredoxin	Thioredoxin peroxidase	3	B	0.788419	8.10419	8.07806	8.26779	8.60109	9.20229	9.11981	9.04189	9.28578	8.98548	8.88261	8.7015	8.86638	9.44678	9.39666	9.42137	9.77524	9.49246	9.74074	9.78973	9.99066	10.7757
BP_RS06550	bp1311	_	_	DoxX family protein	Putative membrane protein	3	B	0.721224	8.82893	8.62039	8.55147	8.48348	8.734	8.58782	8.56481	8.42316	8.42034	8.61773	8.70523	8.55968	9.15645	9.05483	8.99474	8.8762	9.08259	8.54527	8.97972	9.09402	9.13577
BP_RS06555	bp1312	_	_	M4 family metallopeptidase	_	1	B	0.918799	8.16297	8.15928	7.97351	8.88835	8.9755	9.18509	9.71408	9.41903	9.18556	9.00206	9.20282	8.98631	10.2231	10.3159	10.1637	10.1313	10.1079	9.94582	10.0433	10.1326	9.89634
BP_RS06560	bp1313	_	_	hypothetical protein	Uncharacterized protein	12	_	0.715537	5.63719	5.59305	5.24153	5.45732	5.0446	5.39933	5.60361	5.09547	5.27542	5.00799	5.39201	4.27616	6.58114	6.93683	7.03839	6.06323	6.0732	5.87587	5.7173	6.20647	6.38916
BP_RS06565	bp1314	_	_	aldo/keto reductase	Putative exported protein	7	A	0.574537	7.54486	7.57383	7.46609	8.51199	8.24137	8.45523	7.87226	7.9281	7.77453	7.68441	7.96791	7.97842	7.79416	8.20933	8.00198	7.6515	7.75766	7.8464	7.65703	7.84517	8.26253
BP_RS06570	bp1315	_	_	universal stress protein	Universal stress family protein	8	_	0.697426	10.0513	10.157	9.87169	11.4555	12.1103	12.3617	11.1126	11.363	11.2705	10.7961	10.8765	11.0124	11.3967	11.3703	11.4037	11.2597	11.1731	11.1549	11.1871	11.4413	12.0754
BP_RS06580	bp1318	_	_	hypothetical protein	Putative membrane protein	3	B	0.697801	8.83814	8.7802	8.99525	9.15682	9.48363	9.41842	9.4623	9.31335	9.24316	9.34039	9.45223	9.28668	9.52502	9.79112	9.79633	9.9434	9.94819	9.93901	9.73951	9.75403	9.29454
BP_RS06585	bp1319	ptsJ	_	transcriptional regulator PtsJ	GntR-family transcriptional regulator	10	D	0.974862	10.8042	10.7106	10.7646	10.2466	10.2845	10.4528	9.8683	10.0813	10.0595	10.0031	10.119	10.1505	11.8148	12.0675	12.0496	8.7532	8.69646	8.77	9.4673	9.79423	10.332
BP_RS06590	bp1320	_	_	YggS family pyridoxal phosphate-dependent enzyme	Pyridoxal phosphate homeostasis protein (PLP homeostasis protein)	10	D	0.983517	10.7318	10.6173	10.833	10.076	10.2201	10.3847	9.66846	9.90645	9.89599	9.9023	9.98639	9.99556	12.0879	12.1635	12.324	8.84111	8.97117	8.65889	9.8663	10.1837	10.3029
BP_RS06595	bp1321	pdxK	pdxK	pyridoxine/pyridoxal/pyridoxamine kinase	Pyridoxine/pyridoxal/pyridoxamine kinase (PN/PL/PM kinase) (EC 2.7.1.35) (B6-vitamer kinase)	10	D	0.982882	10.6295	10.5974	10.7978	10.1475	10.0829	10.1755	9.83019	9.82975	9.80014	10.1461	10.1365	10.0379	12.0802	12.2712	12.2646	8.73516	8.70316	8.65792	9.85648	10.188	10.4144
BP_RS06600	bp1322	_	_	GAF domain-containing protein	_	10	D	0.979571	10.1659	10.0332	10.1713	9.68635	9.28232	9.39492	9.175	9.3444	9.3376	9.27903	9.44601	9.27458	11.363	11.6388	11.4471	9.59795	9.65006	9.46338	9.97289	10.1011	10.0524
BP_RS06605	bp1323	treY	_	malto-oligosyltrehalose synthase	Probable alpha amylase	_	_	0.0599302	6.32931	6.21534	6.38304	6.08931	6.51089	6.27942	6.18328	6.73953	6.36606	5.97357	6.37473	6.2192	6.48634	6.78418	6.42	6.54734	6.4229	6.58681	6.39278	5.96079	6.11973
BP_RS06610	bp1324	_	_	4-alpha-glucanotransferase	_	_	_	0.147321	3.0108	3.49519	3.65177	3.33039	4.8642	4.63975	3.72236	4.52672	3.34814	3.40003	3.66552	3.91766	3.56212	3.05472	3.95717	4.47616	4.03293	3.72731	4.55271	3.76084	4.82999
BP_RS06615	bp1326	treZ	_	malto-oligosyltrehalose trehalohydrolase	Malto-oligosyltrehalose trehalohydrolase (MTHase) (EC 3.2.1.141) (4-alpha-D-((1->4)-alpha-D-glucano)trehalose trehalohydrolase) (Maltooligosyl trehalose trehalohydrolase)	_	_	0.0442964	5.10274	4.98861	4.89645	4.88869	5.41627	4.98008	5.27264	5.07022	5.12966	4.88187	4.8603	4.52507	4.53757	5.3715	4.69934	5.99209	5.37316	4.94026	5.58866	4.75902	5.50242
BP_RS06620	bp1327	glgX	glgX	glycogen debranching protein GlgX	Probable glycosyl hydrolase	_	_	0.0516828	5.78123	5.69196	5.57336	5.41123	5.71154	5.48692	5.14298	5.35565	5.18241	4.9625	5.4807	5.04387	4.73088	5.49779	5.55309	5.88429	5.40549	5.3099	5.80677	4.99578	5.93004
BP_RS06625	bp1328	glgB	glgB	1%2C4-alpha-glucan branching protein GlgB	1,4-alpha-glucan branching enzyme GlgB (EC 2.4.1.18) (1,4-alpha-D-glucan:1,4-alpha-D-glucan 6-glucosyl-transferase) (Alpha-(1->4)-glucan branching enzyme) (Glycogen branching enzyme) (BE)	_	_	0.0356765	6.57622	6.13206	5.58248	5.20084	5.74387	5.67564	5.58094	5.55514	5.0482	4.95811	5.44673	5.08899	5.39024	5.84917	5.68779	5.79703	5.91708	5.72154	5.45024	5.59472	5.64878
BP_RS06630	bp1329	treS	_	maltose alpha-D-glucosyltransferase	Maltose alpha-D-glucosyltransferase (EC 5.4.99.16)	_	_	0.0680287	7.78396	7.44756	7.07163	6.74131	6.69771	6.79983	6.08947	6.42319	6.6859	6.46969	6.55105	6.31217	5.97715	6.67236	6.37613	6.64069	6.85461	6.71947	5.91803	6.3767	6.46107
BP_RS06635	bp1330	_	_	alpha-1%2C4-glucan--maltose-1-phosphate maltosyltransferase	_	_	_	0.101157	7.37867	7.37221	7.19575	7.012	7.07508	6.95317	6.29956	6.4575	6.49968	6.58648	6.47035	6.3613	6.39577	6.87079	6.46257	6.54734	6.85307	6.87359	6.1636	6.65022	5.89585
BP_RS06640	bp1332	_	_	IS481-like element IS481 family transposase	_	_	_	0.02065	0.503885	0.752809	0.716075	0.749507	1.1392	0.468096	1.1188	0.942552	1.11405	0.525307	0	0	0	0.936332	0	0	0	0	0.925072	1.02927	0
BP_RS06645	bp1333	_	_	hypothetical protein	Uncharacterized protein	_	_	0.00487954	0	1.60876	1.19246	2.1395	0	1.66506	0	2.53445	1.11405	1.83098	1.62234	1.52689	1.89836	2.21867	2.70357	1.48027	2.5493	2.68111	2.72463	1.10856	1.27969
BP_RS06650	bp1334	_	_	alpha/beta fold hydrolase	Peptidase_S9 domain-containing protein	_	_	0.00123619	4.0021	4.85874	4.23975	4.70298	4.26992	3.64449	4.02073	4.11254	4.15977	4.09165	4.68988	4.08695	4.01847	4.31735	4.27653	4.7549	4.52031	4.34581	4.24607	4.30289	3.7919
BP_RS06655	bp1335	_	_	DUF3182 family protein	Uncharacterized protein	_	_	0.127167	5.56087	5.37599	5.47783	5.29088	4.41729	4.97419	5.02833	4.69443	4.69408	4.70404	5.26369	5.08444	5.06327	5.26072	5.04085	4.83332	4.87343	4.88822	4.02496	4.66006	4.32185
BP_RS06665	bp1337	_	_	IS481-like element IS481 family transposase	_	_	_	0.0206337	0.503885	0.752809	0.716075	0.749507	1.1392	0.468096	1.1188	0.942552	1.11405	0.525307	0	0	0	0.936332	0	0	0	0	0.925072	1.02927	0
BP_RS06660	bp1338	_	_	UPF0104 family protein	_	_	_	0.0819557	6.38488	6.21534	6.21468	6.47022	6.22319	6.19546	6.20247	5.79165	6.11636	5.6847	6.2664	6.45483	6.36768	6.61246	6.25218	6.20012	6.49406	6.36576	5.91803	6.2069	5.86084
BP_RS06675	bp1339	clsB	clsB	cardiolipin synthase ClsB	Cardiolipin synthase B (CL synthase) (EC 2.7.8.-)	_	_	0.0116775	1.94175	2.96956	2.27984	2.67061	4.26992	2.77315	3.34331	2.94691	3.07246	2.92734	3.55914	2.25196	2.6906	3.466	3.21275	3.88306	3.45634	2.99942	3.14631	3.35761	3.53044
BP_RS06680	bp1340	_	_	endonuclease/exonuclease/phosphatase family protein	Endo/exonuclease/phosphatase domain-containing protein	_	_	0.0388813	4.10798	3.40138	4.19795	4.48979	4.37963	3.61375	4.30352	3.16819	3.99616	4.04318	3.37216	3.47333	4.56108	4.15399	4.40725	4.65918	4.16671	4.20883	5.07334	3.77814	4.18066
BP_RS06685	bp1341	_	_	hypothetical protein	_	3	B	0.849434	5.00252	4.489	4.90313	5.09154	6.16898	6.73397	6.02337	6.65203	6.2645	5.81792	5.91695	5.94406	7.29067	7.4326	7.1415	7.75952	7.5446	7.33168	7.71134	8.07905	8.55114
BP_RS06690	bp1342	_	_	helix-turn-helix transcriptional regulator	PadR domain-containing protein	8	_	0.554078	7.15433	7.37062	7.39871	8.01779	7.93738	7.96253	7.95547	8.08771	8.09614	8.25827	8.17445	8.14498	8.31032	9.00676	8.47126	8.64124	8.92438	8.19533	8.46791	8.68471	8.49976
BP_RS06695	bp1343	_	_	siderophore-interacting protein	_	8	_	0.405674	6.50989	6.71234	6.84996	7.54732	7.54999	7.66104	7.59778	7.67417	7.67784	7.7127	7.61766	7.72383	7.2773	7.26761	7.41155	7.60892	7.65544	7.49912	7.80912	7.68702	7.59684
BP_RS06700	bp1344	_	_	BP1344/BB2830 family autotransporter	Autotransporter	4	A	0.7906	8.53788	8.84175	8.7286	8.98694	8.75107	8.73112	8.98961	8.98641	9.00172	8.84363	8.95646	8.84587	8.49225	8.37948	8.42177	8.58182	8.53401	8.60925	8.47389	8.40853	8.16277
BP_RS06705	bp1345	_	_	TM0106 family RecB-like putative nuclease	Uncharacterized protein	5	C	0.94276	9.98154	10.0828	10.0591	10.4321	10.28	10.3112	10.3743	10.4774	10.403	10.3181	10.3748	10.3204	9.3957	9.47823	9.40386	10.2985	10.2362	10.396	10.0848	9.98419	10.1787
BP_RS06710	bp1346	_	_	LysR family transcriptional regulator	LysR-family transcriptional regulator	5	C	0.925644	9.50572	9.52211	9.62151	10.0813	10.3823	10.2885	10.4804	10.4774	10.5123	10.6324	10.5556	10.4592	10.0247	9.87829	9.868	10.6771	10.6013	10.6138	10.8161	10.7495	10.8093
BP_RS06715	bp1347	_	_	NAD(P)H-dependent oxidoreductase	Putative reductase	5	C	0.647611	8.44015	8.36785	8.30638	8.65678	8.71227	8.63933	8.60295	8.63455	8.49076	8.19724	8.44202	8.20736	8.03825	8.14867	8.15733	8.89827	8.67414	8.78476	8.50542	8.95265	9.26914
BP_RS06720	bp1348	_	citE	CoA ester lyase	Putative citrate lyase beta chain (EC 4.1.3.6)	_	_	0.235578	7.57126	7.54422	7.65613	7.92192	8.08525	8.10428	7.61418	7.7841	7.80768	7.54091	8.06673	7.82493	7.41815	7.47106	7.40242	7.70435	7.6954	7.61387	7.70266	7.56588	7.81379
BP_RS06725	bp1349	_	_	GntR family transcriptional regulator	Putative GntR-family transcriptional regulator	7	A	0.823823	8.5546	8.58355	8.61857	8.86331	9.369	9.44838	9.18232	9.17767	9.26728	8.90145	8.90108	8.97825	8.68969	8.57741	8.88123	8.67006	8.46828	8.56964	8.14828	8.16433	8.30613
BP_RS06730	bp1350	_	_	acetate--CoA ligase family protein	Putative acetyl-CoA synthetase	5	C	0.722127	5.77863	5.46465	5.1274	5.20084	6.1209	5.54573	6.05773	6.35562	5.86796	6.40443	5.96274	5.61993	4.91851	5.0029	5.12944	5.79689	5.94219	6.04356	6.73532	6.47377	7.03075
BP_RS06735	bp1351	_	_	tripartite tricarboxylate transporter substrate binding protein	_	2	B	0.799438	4.37295	4.75303	4.34207	5.2186	5.16492	5.27792	5.80467	5.61281	5.78885	5.39137	5.57808	6.10306	4.51243	4.42869	4.78133	6.29506	5.8793	5.71703	6.18229	6.92753	7.46457
BP_RS06740	bp1352	_	_	citryl-CoA lyase	Citrate synthase (unknown stereospecificity) (EC 2.3.3.16)	5	C	0.65182	3.33373	3.66063	3.57604	3.80149	4.48133	3.96877	4.72648	4.64213	5.10126	4.24981	4.63839	4.78892	3.19908	3.62784	3.06215	5.01166	4.65921	4.10773	4.63653	4.75621	5.63089
BP_RS06745	bp1353	_	_	CoA transferase	Uncharacterized protein	5	C	0.498892	4.67801	5.3237	5.2898	5.74887	6.01653	5.64774	5.4709	6.37311	6.07509	6.14047	6.13259	6.02184	2.77579	4.62965	5.13721	6.07104	5.66887	5.8972	5.99604	6.01123	6.61611
BP_RS06750	bp1354	_	_	tripartite tricarboxylate transporter substrate binding protein	Putative exported protein	_	_	0.00584356	5.82087	5.52662	6.01409	5.79059	6.2418	5.67346	5.8435	6.05434	5.7923	6.32193	5.91275	5.73796	5.39024	6.21377	5.77752	5.81935	6.08411	6.14164	6.13149	5.4137	6.36437
BP_RS06755	bp1355	_	_	LacI family DNA-binding transcriptional regulator	Probable LacI-family transcriptional regulator	7	A	0.72015	9.71979	9.93487	9.88481	10.2423	10.1833	10.0732	10.2254	10.3474	10.2449	10.0151	10.0486	10.1187	9.87769	9.74304	9.82972	9.86524	9.73807	9.90451	9.75104	9.69305	9.06722
BP_RS06760	bp1356	leuD	leuD1	3-isopropylmalate dehydratase small subunit	3-isopropylmalate dehydratase small subunit 1 (EC 4.2.1.33) (Alpha-IPM isomerase 1) (IPMI 1) (Isopropylmalate isomerase 1)	4	A	0.758122	10.5797	10.4439	10.497	10.4768	10.0307	9.92713	10.212	10.0254	9.95532	10.0328	10.0602	10.0059	9.68934	9.65542	9.58615	9.4918	9.59651	9.66441	9.69917	9.44804	9.06929
BP_RS06765	bp1357	_	_	3-isopropylmalate dehydratase large subunit	_	4	A	0.87578	9.32872	9.32013	9.45043	10.076	10.1485	10.0596	9.478	9.46972	9.42194	9.33746	9.34333	9.31514	9.09914	9.09154	8.9755	8.99761	9.14077	9.05399	8.77118	9.11232	9.13034
BP_RS06770	bp1358	_	_	tripartite tricarboxylate transporter substrate binding protein	Putative exported protein	5	C	0.984229	9.81679	9.94656	10.1342	10.2603	10.5325	10.4353	10.4463	10.5185	10.4175	10.4228	10.413	10.3797	8.17972	8.3439	8.29217	10.0952	10.0089	9.95448	10.9776	11.2836	11.481
BP_RS06775	bp1359	_	_	mandelate racemase/muconate lactonizing enzyme family protein	Putative mandelate racemase	5	C	0.973719	10.6001	10.7116	10.9371	11.2934	11.2217	11.1795	11.1253	11.3257	11.1364	11.1603	11.0251	11.0863	9.31049	9.21516	9.31899	10.4267	10.4111	10.4874	11.0317	11.2353	11.6406
BP_RS06780	bp1360	_	_	2-dehydropantoate 2-reductase	2-dehydropantoate 2-reductase (EC 1.1.1.169) (Ketopantoate reductase)	5	C	0.964707	10.2625	10.3728	10.6105	10.8108	10.9428	10.9697	10.7983	10.9303	10.9376	10.812	10.8877	10.6852	9.32383	9.02497	9.31512	10.012	10.07	9.99366	10.5091	10.7459	11.1739
BP_RS06785	bp1361	_	_	IS481-like element IS481 family transposase	_	_	_	0.0210355	0.503885	0.752809	0.716075	0.749507	1.1392	0.468096	1.1188	0.942552	1.11405	0.525307	0	0	0	0.936332	0	0	0	0	0.925072	1.02927	0
BP_RS06790	bp1362	_	_	amino acid ABC transporter ATP-binding protein	Putative amino-acid ABC transporter, ATP-binding protein	1	B	0.983354	7.02409	7.01941	6.95137	7.3012	7.1558	7.1083	10.036	9.9835	10.1657	9.87071	10.0161	10.0362	11.055	10.8478	11.1769	10.551	10.4042	10.7248	9.73198	9.74454	9.51452
BP_RS06795	bp1363	_	_	amino acid ABC transporter permease	Putative amino-acid ABC transporter, permease protein	2	B	0.9964	6.30372	6.3547	6.48586	6.6789	6.62288	6.64687	10.6669	10.6748	10.6665	10.7939	10.6444	10.6619	11.7713	11.7205	11.8447	11.3744	11.2123	11.437	10.433	10.3628	10.3151
BP_RS06800	bp1364	_	_	amino acid ABC transporter substrate-binding protein	Putative amino-acid ABC transporter, periplasmic amino acid-binding protein	1	B	0.99445	8.76308	8.69977	8.747	8.97848	9.52003	9.5029	12.7776	12.9509	13.0719	13.217	13.0646	12.967	15.0324	14.8523	14.9299	14.1027	13.8672	14.1287	13.503	13.286	13.278
BP_RS06805	bp1365	_	_	IS110-like element IS1663 family transposase	Transposase for IS1663	_	_	0.232022	2.94465	2.19407	2.27984	2.67061	3.63604	3.73548	3.10843	2.27347	2.79374	2.54341	2.55348	3.5045	3.91039	4.48991	3.21275	3.17872	3.80144	3.52296	4.32723	4.0403	4.12022
BP_RS06810	bp1366	flhB	flhB	flagellar type III secretion system protein FlhB	Flagellar biosynthetic protein FlhB	_	_	0.220466	6.85549	6.18028	6.51762	6.07023	5.97888	6.29041	5.92492	6.08554	6.30371	6.09038	6.00902	5.63503	6.12954	6.72496	6.50393	6.07191	6.50446	6.24182	6.3236	5.98733	5.43362
BP_RS06815	bp1367	flhA	_	flagellar biosynthesis protein FlhA	_	_	_	0.0376211	6.53894	6.43686	6.39011	5.8418	6.1929	6.35186	6.12242	6.67049	6.37698	6.34787	5.69847	6.43654	7.01965	6.47104	6.74962	6.36576	6.51726	6.34808	6.41191	5.83335	6.48427
BP_RS06820	bp1368	flhF	_	flagellar biosynthesis protein FlhF	_	_	_	0.145052	5.07657	4.71601	4.40779	4.67009	4.25088	4.7614	4.12128	4.47277	4.24721	4.09669	4.75405	4.4395	5.43571	4.64307	4.84577	5.11938	4.83305	4.67864	4.70763	4.70662	4.29001
BP_RS06825	bp1370	_	_	flagellar protein FlgN	Uncharacterized protein	_	_	0.0207414	7.21271	7.21728	7.29034	7.55716	7.96542	8.25966	8.05367	7.99169	8.20906	7.88583	7.83674	7.7516	8.28531	8.14867	8.07827	8.09348	7.96239	7.94342	8.2169	7.97681	8.02598
BP_RS06830	bp1371	flgM	flgM	flagellar biosynthesis anti-sigma factor FlgM	Anti-sigma-28 factor (Negative regulator of flagellin synthesis)	_	_	0.0177197	6.91405	6.75859	7.01009	7.25916	7.75692	8.03762	7.76136	7.82573	7.86945	7.60836	7.61001	7.88497	7.60497	7.93632	8.23248	7.89071	7.83345	7.54237	7.89771	8.05208	7.83983
BP_RS06835	bp1372	flgA	flgA	flagellar basal body P-ring formation protein FlgA	Flagella basal body P-ring formation protein FlgA	13	_	0.605407	8.52967	8.4862	8.52422	8.34344	8.58893	8.6366	8.73196	8.69849	8.7256	8.21404	8.06031	8.17439	8.73732	8.71551	8.93369	8.42461	8.16749	8.73526	8.22157	8.16627	8.64817
BP_RS06840	bp1373	flgB	flgB	flagellar basal body rod protein FlgB	Flagellar basal body rod protein FlgB	_	_	0.108686	1.43786	4.00644	4.29561	3.33039	3.54452	4.56399	3.34331	3.45766	4.39556	3.0699	4.05185	3.88573	3.19974	4.15399	3.8755	4.26305	4.31869	4.50169	4.89535	4.80958	3.7919
BP_RS06845	bp1374	flgC	flgC	flagellar basal body rod protein FlgC	Flagellar basal-body rod protein FlgC	_	_	0.170605	4.02372	4.00293	3.49612	3.43822	4.62217	4.74244	3.72061	4.21075	4.25246	3.78127	3.87158	4.13241	4.11901	4.29787	3.97309	4.49057	4.83745	4.57972	4.74446	4.20045	5.25265
BP_RS06850	bp1375	flgD	flgD	flagellar basal body rod modification protein FlgD	Basal-body rod modification protein FlgD	3	B	0.316119	5.6437	5.53028	5.50293	6.10814	5.98948	5.63834	5.72372	5.74763	5.85077	6.07718	5.80959	5.61993	6.37294	5.90227	5.92449	6.17537	6.10517	6.388	6.1636	6.15998	7.03075
BP_RS06855	bp1376	_	flgE	flagellar hook-basal body complex protein	Flagellar hook protein FlgE	2	B	0.611423	6.2858	6.47068	6.29815	6.75424	6.73915	6.47955	6.29148	6.74708	6.62908	6.80213	6.76943	6.72266	6.97526	7.04094	7.24269	7.25426	7.40601	6.98803	7.20955	7.45849	8.03508
BP_RS06860	bp1377	_	flgF	flagellar basal body rod protein FlgF	Flagellar basal body protein	_	_	0.0140123	5.16039	4.60243	4.55828	4.95297	5.21248	4.7251	4.92084	4.52169	4.70408	5.15351	4.13419	4.68801	4.46301	5.08286	4.92641	5.11938	4.69717	4.94026	4.96779	5.08058	5.19758
BP_RS06865	bp1378	flgG	flgG	flagellar basal-body rod protein FlgG	Flagellar basal-body rod protein FlgG (Distal rod protein)	2	B	0.287162	5.67187	5.57243	5.50187	5.70297	5.62912	5.79301	5.74751	6.11317	5.8245	6.04202	6.13259	6.12567	6.52727	6.2381	6.3238	5.79689	6.15736	6.43814	6.31359	6.17934	6.87158
BP_RS06870	bp1379	_	flgH	flagellar basal body L-ring protein FlgH	Flagellar L-ring protein (Basal body L-ring protein)	_	_	0.00377588	4.54529	4.88789	4.27917	4.85449	3.83072	4.88716	4.46531	4.32007	4.7434	4.80062	4.8603	4.52673	4.213	4.3992	4.20644	4.79961	5.28209	3.65539	5.22644	4.52167	5.3057
BP_RS06875	bp1380	_	flgI	flagellar basal body P-ring protein FlgI	Flagellar P-ring protein (Basal body P-ring protein)	_	_	0.0268895	4.86899	4.92875	5.23125	5.1289	4.48159	4.50408	4.74289	5.22616	4.69696	4.71948	4.91181	4.96731	4.60846	4.36476	4.14187	4.37086	4.5817	5.26076	5.01861	4.30289	5.43362
BP_RS06880	bp1381	flgJ	flgJ	flagellar assembly peptidoglycan hydrolase FlgJ	Muramidase FlgJ (Peptidoglycan hydrolase FlgJ)	_	_	0.0108848	4.15425	4.12095	4.35392	3.43822	3.95862	3.47826	4.04489	4.39046	4.16413	3.84441	4.13995	3.74292	3.43678	3.87822	4.34337	4.01926	3.71521	4.2755	4.10249	4.1226	4.2293
BP_RS06885	bp1382	flgK	flgK	flagellar hook-associated protein FlgK	Flagellar hook-associated protein 1 (HAP1)	_	_	0.005176	6.04565	6.6351	6.49926	6.12612	6.04308	6.20648	6.08288	6.30185	6.24359	5.96233	6.25758	6.16482	5.71333	6.14994	5.45092	6.28485	6.35135	6.20147	6.34723	6.28601	6.57349
BP_RS06890	bp1383	flgL	flgL	flagellar hook-associated protein FlgL	Flagellar hook-associated protein 3	_	_	0.0761984	7.1726	6.90927	6.73876	7.17729	6.74066	6.98725	7.08471	6.53972	6.68872	6.41793	6.62499	6.60518	6.57156	6.64309	6.23727	6.71177	6.68543	6.49083	6.972	6.7052	6.67347
BP_RS06895	bp1384	_	tsr	Tar ligand binding domain-containing protein	Methyl-accepting chemotaxis protein I	11	_	0.275966	7.687	7.52453	7.55972	7.45472	7.2325	7.07071	6.71805	7.02709	6.97384	7.06711	7.15222	7.16998	6.80818	7.26285	6.95593	7.52932	7.88506	7.4371	7.28386	7.21924	6.5517
BP_RS06900	bp1385	_	tar	Tar ligand binding domain-containing protein	Methyl-accepting chemotaxis protein II	3	B	0.725032	7.41719	7.47553	7.31966	7.68205	7.67055	7.72843	7.6623	7.81823	7.95787	7.59909	7.68619	7.48577	7.73072	7.77762	7.79159	8.19803	8.25339	8.26376	8.15489	8.51603	8.75693
BP_RS06910	bp1386	_	_	HAMP domain-containing protein	_	_	_	0.0954665	6.87204	7.09778	7.18682	6.59561	6.7553	6.89615	6.9424	6.92834	7.0804	6.95335	6.97366	6.94847	6.52958	6.7164	6.13423	6.88564	6.98531	6.77175	6.64764	6.85143	6.1428
BP_RS06920	bp1389	fliR	fliR	flagellar biosynthetic protein FliR	Flagellar biosynthetic protein FliR	_	_	0.124866	4.39315	3.22402	3.88869	3.84974	4.20611	3.17942	4.02073	3.11598	3.6964	3.45577	3.04886	3.21086	4.00031	3.89597	3.95717	4.24032	3.45634	4.67864	4.32723	4.19728	4.59818
BP_RS06925	bp1390	fliQ	fliQ	flagellar biosynthesis protein FliQ	Flagellar biosynthetic protein FliQ	2	B	0.25041	3.33373	3.58028	3.57182	3.43822	3.80289	3.04467	4.97559	2.70743	3.22738	3.11344	2.55348	2.25196	2.30201	3.29823	3.37893	4.32675	4.08426	3.72731	4.06245	3.65112	4.88545
BP_RS06930	bp1391	fliP	fliP	flagellar type III secretion system pore protein FliP	Flagellar biosynthetic protein FliP	1	B	0.34543	6.20083	5.92127	6.06877	6.64063	6.76108	6.5746	6.77531	6.39186	6.5636	6.40248	6.76983	6.43201	7.02874	6.94786	6.72476	7.02104	7.085	6.79203	7.08156	7.18525	6.88369
BP_RS06935	bp1392	fliO	fliO	flagellar biosynthetic protein FliO	Flagellar protein	_	_	0.0171283	4.76097	4.41031	4.55828	4.38746	5.21248	4.38943	5.18751	5.0425	4.84547	4.8854	4.48737	4.0127	4.51243	4.0472	4.78929	4.83332	5.25326	5.22295	3.85437	4.36857	4.32185
BP_RS06940	bp1393	fliN	fliN	flagellar motor switch protein FliN	Flagellar motor switch protein FliN	_	_	0.201038	5.29992	5.32005	5.0791	5.69291	6.18276	5.48628	5.81704	5.12738	5.49943	5.75478	5.88764	5.58067	5.64753	5.85325	5.54834	6.17537	6.38387	6.39515	6.07882	6.32549	6.11973
BP_RS06945	bp1394	fliM	fliM	flagellar motor switch protein FliM	Flagellar motor switch protein FliM	5	C	0.385426	7.78565	7.59177	7.35407	8.23722	8.02208	8.23272	8.31523	8.00549	7.88924	7.79784	7.70649	7.7133	7.40148	7.90669	7.53586	8.43437	8.16653	8.48187	7.89105	8.10352	7.95548
BP_RS06950	bp1395	fliL	fliL	flagellar basal body-associated protein FliL	Flagellar protein FliL	_	_	0.120712	5.00963	5.64954	5.1319	5.72467	5.86201	5.47688	5.76476	5.26265	5.49943	5.01718	5.17263	5.37349	5.53019	4.90863	5.21266	5.9053	5.92739	5.72154	5.40818	5.63124	5.63074
BP_RS06970	bp1399	fliJ	fliJ	flagellar export protein FliJ	Flagellar FliJ protein	_	_	0.0171207	4.95585	4.76678	4.89603	4.38746	3.95862	4.70226	4.72648	4.3477	4.6698	4.52602	4.42597	4.67024	4.73088	4.96803	5.15763	4.10895	5.03716	4.29791	4.06245	4.44715	4.48659
BP_RS06975	bp1400	fliI	fliI	flagellar protein export ATPase FliI	Flagellum-specific ATP synthase FliI (EC 3.6.3.14)	4	A	0.74314	9.21357	9.20664	9.1567	8.83736	8.90579	8.96699	8.85499	8.76292	8.90342	8.53187	8.62921	8.67897	9.03551	9.3129	9.03321	8.69219	9.01341	8.58076	8.30504	8.50487	8.01763
BP_RS06980	bp1401	fliH	fliH	flagellar assembly protein FliH	Flagellar assembly protein FliH	_	_	0.0225975	3.99022	4.06666	4.24761	3.67541	4.52999	4.06548	3.72061	4.03028	3.90177	3.45272	3.2879	3.82492	4.30124	4.12199	2.98894	3.51098	3.45634	4.23168	4.48011	4.0544	3.53044
BP_RS06985	bp1402	fliG	fliG	flagellar motor switch protein FliG	Flagellar motor switch protein FliG	_	_	0.160428	5.32866	5.41681	5.55147	5.47891	5.75259	5.40584	5.3916	5.49992	5.41655	5.05625	5.09845	5.2012	5.49917	5.3646	5.46013	5.65034	5.76523	5.46949	5.32017	4.81073	3.97974
BP_RS06990	bp1403	fliF	fliF	flagellar M-ring protein FliF	Flagellar M-ring protein	_	_	0.00796713	6.52086	6.31801	6.3191	6.21623	6.52978	6.66946	6.5887	6.29355	6.27457	6.42692	6.37473	6.33932	6.39316	6.75899	6.53764	6.67809	6.43958	6.40963	6.18229	6.10031	6.65751
BP_RS06995	bp1404	fliE	fliE	flagellar hook-basal body complex protein FliE	Flagellar hook-basal body complex protein FliE	_	_	0.0130124	2.74021	3.09022	2.75595	2.45219	3.13072	3.76605	2.50757	2.53445	3.88821	2.73584	2.90155	2.225	1.73959	3.29823	3.22137	2.85837	3.2463	2.28297	4.06245	2.95621	3.77251
BP_RS07000	bp1405	_	_	hypothetical protein	Uncharacterized protein	_	_	0.00385451	2.60279	2.1429	3.41151	1.24028	2.47845	1.76121	3.34331	2.32037	1.50298	2.61038	2.90155	1.52689	2.50559	1.92615	3.21275	2.82105	1.58269	2.28297	2.25383	2.15993	1.94701
BP_RS07005	bp1406	_	_	EscU/YscU/HrcU family type III secretion system export apparatus switch protein	Putative flagellar protein	_	_	0.0410708	4.06371	4.28163	4.11576	4.05901	3.95862	3.20134	4.21528	3.90507	3.0895	3.29378	3.21955	2.92329	4.51243	4.26852	3.78893	4.09677	4.23237	4.13893	4.24426	3.51221	3.2581
BP_RS07015	bp1407	_	_	hypothetical protein	_	_	_	0.0963939	4.13675	4.89232	4.65054	5.14663	5.44894	4.89759	4.78561	4.84813	5.12947	5.07544	5.21107	5.2542	3.7307	4.31735	4.69006	4.84467	5.12823	4.77122	4.55271	4.69953	5.72527
BP_RS07020	bp1408	_	fliT	flagellar protein FliT	Flagellar protein FliT	_	_	0.0223365	5.06749	5.24608	5.23398	5.47516	5.30316	5.69352	5.27264	5.08557	5.66887	5.69656	5.45484	5.77303	5.46855	5.39625	5.30739	5.74191	5.36891	5.39596	5.53087	5.81179	5.67173
BP_RS07025	bp1409	fliS	fliS	flagellar export chaperone FliS	Flagellar secretion chaperone FliS	_	_	0.0172237	6.52121	6.57238	6.55813	7.10774	6.94486	6.81867	7.23814	6.58303	6.79178	6.90601	6.83657	7.10091	6.80892	6.96752	6.78966	7.00607	6.94423	7.06627	6.92627	7.12012	7.10419
BP_RS07030	bp1410	fliD	fliD	flagellar filament capping protein FliD	Flagellar hook-associated protein 2 (HAP2) (Flagellar cap protein)	_	_	0.228055	7.46078	7.34215	7.52212	7.8014	8.1458	8.18827	8.15249	8.08281	8.11195	8.12737	8.2536	7.90104	8.37006	8.14223	8.13613	8.21985	8.11712	8.26261	8.30183	8.39293	8.657
BP_RS07035	bp1411	_	flaG	flagellar protein FlaG	Putative flagellar protein	12	_	0.326311	5.50565	5.50508	5.67613	5.47891	5.68459	5.23159	5.7157	5.20755	5.60466	5.42751	5.48653	5.43508	6.20422	6.30873	5.81099	5.79689	5.82821	5.69284	5.91803	5.83828	5.50242
BP_RS07040	bp1412	folC	folC	bifunctional tetrahydrofolate synthase/dihydrofolate synthase	Dihydrofolate synthase/folylpolyglutamate synthase (EC 6.3.2.12) (Folylpoly-gamma-glutamate synthetase-dihydrofolate synthetase) (Folylpolyglutamate synthetase)	7	A	0.885034	12.025	12.0047	12.0076	11.4962	10.974	10.9724	11.1431	11.1811	11.055	11.2194	11.1156	11.1806	11.3075	11.119	11.1816	10.4391	10.4416	10.5021	10.3347	10.0532	9.51584
BP_RS07045	bp1413	_	_	SPOR domain-containing protein	SPOR domain-containing protein	10	D	0.722787	10.3056	10.245	10.2978	10.3223	10.8099	10.917	10.6581	10.6669	10.7262	10.519	10.6123	10.6628	11.0342	11.0235	11.2016	10.5986	10.4374	10.4623	10.541	10.4397	10.0393
BP_RS07050	bp1414	_	cvpA	CvpA family protein	Colicin V production protein	10	D	0.920843	9.98314	9.89567	9.88242	9.73905	9.76805	9.81271	9.5629	9.46972	9.66817	9.27514	9.25222	9.28986	10.3984	10.3667	10.4177	9.42684	9.51622	9.47259	9.23185	9.09402	9.14213
BP_RS07055	bp1415	purF	purF	amidophosphoribosyltransferase	Amidophosphoribosyltransferase (ATase) (EC 2.4.2.14) (Glutamine phosphoribosylpyrophosphate amidotransferase) (GPATase)	10	D	0.950096	12.1237	12.2093	12.1941	12.3985	12.2575	12.251	12.1596	12.2066	12.2042	12.3485	12.2801	12.2518	13.0071	12.834	12.928	12.0805	11.9747	12.0616	12.0509	11.9569	12.1535
BP_RS07060	bp1416	_	dsbB	disulfide bond formation protein B	Disulfide bond formation protein B	4	A	0.847422	9.67208	9.76083	9.72325	9.6635	9.43768	9.50497	9.58212	9.46784	9.56765	9.44364	9.44677	9.55597	9.81744	9.76165	9.80531	9.0276	8.89445	9.02621	9.0498	8.82741	8.65796
BP_RS07065	bp1416A	_	_	NAAT family transporter	_	4	A	0.706013	9.94236	9.58817	9.3826	8.86738	8.76532	8.79548	8.80668	8.7141	8.71456	8.37776	8.61015	8.62646	8.42635	8.73621	8.60298	8.19936	8.06578	8.31078	8.17106	8.02351	7.99526
BP_RS07070	bp1417	_	glnD	[protein-PII] uridylyltransferase	Bifunctional uridylyltransferase/uridylyl-removing enzyme (UTase/UR) (Bifunctional [protein-PII] modification enzyme) (Bifunctional nitrogen sensor protein) [Includes: [Protein-PII] uridylyltransferase (PII uridylyltransferase) (UTase) (EC 2.7.7.59); [Protein-PII]-UMP uridylyl-removing enzyme (UR) (EC 3.1.4.-)]	7	A	0.90627	12.7725	12.8219	12.8052	12.2591	12.1444	12.0777	12.1033	12.1626	12.1064	12.062	12.0218	12.0673	11.6063	11.5358	11.6681	11.5142	11.5306	11.805	11.6025	11.503	11.7084
BP_RS07075	bp1418	map	map	type I methionyl aminopeptidase	Methionine aminopeptidase (MAP) (MetAP) (EC 3.4.11.18) (Peptidase M)	4	A	0.687511	12.788	12.8187	12.816	12.2422	12.1076	11.9886	11.9241	12.0701	12.1008	12.2408	12.1973	12.2711	11.996	11.9291	11.9972	11.7803	11.7003	11.8196	11.881	11.6477	11.2674
BP_RS07080	bp1419	rpsB	rpsB	30S ribosomal protein S2	30S ribosomal protein S2	7	A	0.91406	13.7401	13.9725	14.0831	12.8223	12.8525	12.7821	12.6086	12.8057	12.8357	13.1472	13.0186	12.8505	12.0774	11.8805	11.9874	11.9725	11.8938	11.9199	12.0534	11.6796	11.4664
BP_RS07085	bp1420	_	tsf	elongation factor Ts	Elongation factor Ts (EF-Ts)	4	A	0.917531	13.5409	13.6662	13.7309	12.6917	12.9611	12.9546	12.9629	12.9556	13.0399	13.0913	13.0362	12.9722	12.2591	12.1064	12.2162	12.1398	12.0561	12.1898	12.3269	12.0063	11.874
BP_RS07090	bp1421	_	pyrH, smbA	UMP kinase	Uridylate kinase (UK) (EC 2.7.4.22) (Uridine monophosphate kinase) (UMP kinase) (UMPK)	4	A	0.515432	12.1937	12.39	12.4817	11.5938	11.7947	11.6922	11.4152	11.6637	11.7261	11.8951	11.7602	11.6641	11.6644	11.3943	11.5265	11.3223	11.3484	11.4314	11.673	11.6294	11.8028
BP_RS07095	bp1422	frr	frr	ribosome recycling factor	Ribosome-recycling factor (RRF) (Ribosome-releasing factor)	4	A	0.658062	11.6478	11.8583	11.8289	11.261	11.5205	11.4616	11.4176	11.3661	11.4277	11.4926	11.3662	11.3133	11.3346	10.9499	11.1756	10.879	10.7876	10.8921	11.1193	11.0288	11.4461
BP_RS07100	bp1423	uppS	uppS	di-trans%2Cpoly-cis-decaprenylcistransferase	Isoprenyl transferase (EC 2.5.1.-)	7	A	0.901033	10.4706	10.6031	10.5335	9.83579	9.88972	9.87579	9.80719	9.6675	9.6713	9.60572	9.69689	9.59903	9.46181	9.28567	9.33983	8.7436	8.93721	9.0597	8.72902	8.8684	9.05791
BP_RS07105	bp1424	_	cdsA	phosphatidate cytidylyltransferase	Phosphatidate cytidylyltransferase (EC 2.7.7.41)	7	A	0.715623	10.2912	10.0844	10.1158	9.60665	9.7314	9.7518	9.32619	9.40645	9.13683	9.02313	9.3977	9.33419	8.34433	8.27166	8.59546	8.19363	8.54655	8.44712	8.31693	8.21257	8.57772
BP_RS07110	bp1425	_	dxr	1-deoxy-D-xylulose-5-phosphate reductoisomerase	1-deoxy-D-xylulose 5-phosphate reductoisomerase (DXP reductoisomerase) (EC 1.1.1.267) (1-deoxyxylulose-5-phosphate reductoisomerase) (2-C-methyl-D-erythritol 4-phosphate synthase)	4	A	0.945839	11.0104	11.127	11.0708	10.5638	10.5417	10.4995	10.3916	10.4554	10.4713	10.2881	10.3877	10.3509	9.83928	9.76205	9.81346	9.56696	9.65124	9.78847	9.70617	9.54423	9.47655
BP_RS07115	bp1426	rseP	_	RIP metalloprotease RseP	Zinc metalloprotease (EC 3.4.24.-)	4	A	0.511362	12.9534	12.5024	12.4365	12.3401	11.8244	11.9298	12.3198	12.0883	11.7795	11.5037	11.6926	11.717	11.2915	11.6491	11.5687	11.4547	11.4698	11.6492	11.507	11.405	11.3759
BP_RS07120	bp1427	bamA	bamA	outer membrane protein assembly factor BamA	Outer membrane protein assembly factor BamA	4	A	0.85167	14.8184	14.8631	14.8179	14.3923	14.4069	14.4266	14.4592	14.545	14.4977	14.5637	14.4904	14.5458	14.1089	13.9505	14.0698	14.087	13.9238	14.1717	14.2587	14.0702	14.0413
BP_RS07125	bp1428	_	_	OmpH family outer membrane protein	Putative outer membrane protein	6	_	0.74284	14.1685	14.0355	13.9228	14.102	14.1857	14.169	14.0611	14.1671	14.1454	14.4005	14.3919	14.3743	14.2656	14.2883	14.3226	13.9991	13.8348	13.9887	14.2745	14.0742	14.1665
BP_RS07130	bp1429	lpxD	lpxD	UDP-3-O-(3-hydroxymyristoyl)glucosamine N-acyltransferase	UDP-3-O-acylglucosamine N-acyltransferase (EC 2.3.1.191)	4	A	0.924538	12.626	12.5634	12.5284	12.217	11.9216	11.997	11.7576	11.8412	11.8073	11.8117	11.8791	11.9391	11.2694	11.2698	11.3855	11.0268	11.1664	11.1607	11.0263	10.8738	10.4562
BP_RS07135	bp1430	fabZ	fabZ	3-hydroxyacyl-ACP dehydratase FabZ	3-hydroxyacyl-[acyl-carrier-protein] dehydratase FabZ (EC 4.2.1.59) ((3R)-hydroxymyristoyl-[acyl-carrier-protein] dehydratase) ((3R)-hydroxymyristoyl-ACP dehydrase) (Beta-hydroxyacyl-ACP dehydratase)	7	A	0.804853	11.2262	11.2721	11.2604	11.0794	10.8725	10.9572	10.8687	10.8679	10.9449	11.0951	11.1445	11.1162	10.3958	10.3885	10.5154	10.5343	10.4968	10.5851	10.6836	10.4585	10.0039
BP_RS07140	bp1431	lpxA	lpxA	acyl-ACP--UDP-N-acetylglucosamine O-acyltransferase	Acyl-[acyl-carrier-protein]--UDP-N-acetylglucosamine O-acyltransferase (UDP-N-acetylglucosamine acyltransferase) (EC 2.3.1.129)	4	A	0.903725	12.1226	11.9855	11.9919	11.7898	11.7069	11.6952	11.7118	11.7979	11.7167	11.8347	11.8135	11.7816	11.1004	10.9	10.9863	11.2264	11.1057	11.2878	11.4358	11.2559	10.8893
BP_RS07145	bp1432	lpxB	lpxB, pgsB	lipid-A-disaccharide synthase	Lipid-A-disaccharide synthase (EC 2.4.1.182)	4	A	0.946586	11.5951	11.6087	11.5504	11.0961	10.9454	10.8673	10.7944	10.864	10.8015	10.9107	10.9656	10.9673	9.90872	9.8034	9.84136	10.0753	10.1354	10.3799	10.1893	10.016	9.78463
BP_RS07150	bp1433	rnhB	rnhB	ribonuclease HII	Ribonuclease HII (RNase HII) (EC 3.1.26.4)	4	A	0.855097	10.55	10.3321	10.3248	10.0291	9.70043	9.74631	9.86128	9.81663	9.72866	9.75701	9.74218	9.79931	8.91563	8.88955	8.83485	9.27366	9.26104	9.4324	9.30532	8.99698	8.66209
BP_RS07155	bp1434	_	_	RNA methyltransferase	Putative RNA methyltransferase	4	A	0.877763	10.3212	10.3336	10.3358	9.92497	9.98011	9.99388	9.80947	9.91351	9.88552	9.84172	10.0186	9.99963	9.13336	8.9915	9.11563	9.12909	9.24142	9.27925	9.18675	8.99044	8.98793
BP_RS07160	bp1435	_	_	kinase/pyrophosphorylase	Putative phosphoenolpyruvate synthase regulatory protein (PEP synthase regulatory protein) (PSRP) (EC 2.7.11.33) (EC 2.7.4.28) (Pyruvate, water dikinase regulatory protein)	9	D	0.74747	12.3586	12.4582	12.4768	12.4163	12.6826	12.8019	12.4428	12.6509	12.7103	13.0134	12.9475	12.9747	13.1183	12.9797	13.0021	12.7512	12.6584	12.6833	12.8602	12.8586	13.1262
BP_RS07165	bp1436	ppsA	ppsA	phosphoenolpyruvate synthase	Phosphoenolpyruvate synthase (PEP synthase) (EC 2.7.9.2) (Pyruvate, water dikinase)	10	D	0.962145	14.1431	14.193	14.1792	13.8498	13.9759	13.9184	13.9647	14.0897	14.1075	14.1533	14.0292	14.0602	14.9167	14.6844	14.7732	13.73	13.5718	13.6655	13.878	13.6975	13.8314
BP_RS07170	bp1437	_	_	glutamine amidotransferase	Probable class-I glutamine amidotransferase	4	A	0.834256	9.70095	9.60615	9.57626	8.8901	8.83916	8.78955	8.89336	8.96165	8.87235	8.94919	9.1	9.12892	9.18862	9.15535	9.20315	8.3602	8.53249	8.40166	8.26858	8.17149	7.68486
BP_RS07175	bp1438	_	_	NfeD family protein	Putative membrane protein	4	A	0.524106	9.4632	9.5009	9.51928	9.31293	9.30461	9.2627	9.34188	9.40319	9.3127	9.37163	9.48637	9.42387	9.05043	9.01462	9.09755	9.18836	9.18148	9.06444	9.20603	9.113	9.55502
BP_RS07180	bp1439	_	_	IS481-like element IS481 family transposase	_	12	_	0.332568	7.27202	7.43622	7.52993	7.36784	7.35845	7.21556	7.43722	7.58333	7.60983	7.10768	7.31274	7.18871	7.6334	7.70321	7.66347	7.53961	7.49649	7.33168	7.54659	7.37809	7.71416
BP_RS07185	bp1440	_	_	paraslipin	Putative membrane protein	1	B	0.872596	10.4247	10.7756	10.9993	11.9356	12.1733	12.0183	12.1059	12.1256	12.2957	12.605	12.4764	12.2657	12.9908	12.6629	12.7346	12.784	12.7068	12.7227	12.8302	12.8212	13.0359
BP_RS07190	bp1441	_	_	GGDEF domain-containing protein	Probable membrane protein	6	_	0.566415	8.72048	8.91879	9.01339	9.12943	9.30462	9.39626	9.18602	9.16547	9.24892	9.25406	9.25774	9.3023	8.94657	8.78658	8.89826	9.2389	9.38243	9.34097	8.99225	9.06708	8.77925
BP_RS07195	bp1442	smpB	smpB	SsrA-binding protein SmpB	SsrA-binding protein (Small protein B)	4	A	0.612018	11.8664	11.7881	11.8825	11.844	11.3869	11.3331	11.3952	11.3396	11.3133	11.6879	11.6519	11.7623	10.9892	11.1084	11.2621	11.1218	11.0767	11.0744	11.1832	10.8368	9.68039
BP_RS07200	bp1443	_	_	type II toxin-antitoxin system RatA family toxin	Ribosome association toxin RatA	4	A	0.548112	9.49382	9.64472	9.62967	9.5528	9.82771	9.78662	9.86491	9.74624	9.7184	9.8365	9.67299	9.82482	9.62243	9.67078	9.8265	9.55703	9.48072	9.56516	9.53102	9.43073	9.15303
BP_RS07205	bp1444	_	_	RnfH family protein	UPF0125 protein BP1444	4	A	0.42672	6.78565	6.69363	6.68524	6.58673	7.34116	7.3009	6.65235	7.12194	7.23691	6.48339	7.07766	6.57945	7.08232	6.55755	6.53284	6.50824	6.2675	6.20147	6.34723	5.90621	6.32589
BP_RS07210	bp1445	_	_	acyl-CoA dehydrogenase family protein	Probable acyl-CoA dehydrogenase	5	C	0.953208	8.95207	9.03746	9.03922	9.12825	8.8628	8.93562	8.91803	8.9757	9.02189	9.09926	9.28924	9.02602	8.21967	8.14893	8.21395	10.1255	10.1558	10.0735	10.357	10.6821	11.4233
BP_RS07215	bp1446	_	_	enoyl-CoA hydratase/isomerase family protein	Enoly-CoA hydratase	5	C	0.966836	9.7314	9.81632	9.95207	9.99708	10.0644	10.0311	9.91129	10.0987	10.2015	10.2806	10.1837	10.242	9.29721	9.23621	9.37819	10.8014	10.7817	10.7886	11.218	11.377	11.9035
BP_RS07220	bp1447	mmsB	mmsB	3-hydroxyisobutyrate dehydrogenase	3-hydroxyisobutyrate dehydrogenase (HIBADH) (EC 1.1.1.31)	5	C	0.95908	7.86333	7.84432	8.09994	8.02955	8.42355	8.18515	8.45203	8.42012	8.56764	8.50067	8.486	8.50842	7.40984	7.27992	7.20988	9.31796	9.2907	9.3207	9.7561	9.96418	10.6453
BP_RS07225	bp1448	_	_	PaaI family thioesterase	4HBT domain-containing protein	5	C	0.897526	6.3482	6.44453	6.4868	7.04214	6.91038	6.9583	7.39863	7.27577	7.13922	6.97355	7.16384	7.20051	5.49917	5.70985	5.33349	7.91205	7.77873	7.8934	8.10284	8.28562	8.83668
BP_RS07230	bp1449	_	_	VIT family protein	Putative membrane protein	4	A	0.624953	8.45702	8.54724	8.56635	8.04773	8.01321	8.06036	8.07938	7.8868	8.05127	7.99863	8.21539	8.01349	7.19025	7.30514	7.24526	7.52008	7.88535	7.46593	7.72854	7.65757	7.18205
BP_RS07235	bp1450	_	_	IS481-like element IS481 family transposase	Transposase	_	_	0.00107382	2.40331	1.13223	1.44705	1.60581	0.978079	2.63629	2.50757	1.50785	1.96756	0.503306	2.04198	2.225	1.2412	1.49943	0.940371	1.80768	2.08259	2.28297	1.8861	1.62385	2.3846
BP_RS07240	bp1451	tal	tal	transaldolase	Transaldolase (EC 2.2.1.2)	7	A	0.867201	10.1955	9.9861	10.1606	10.1258	10.169	10.1674	9.98319	9.96383	9.84543	9.74344	9.72807	9.89089	9.62671	9.70863	9.75175	9.61239	9.64715	9.6175	9.51625	9.51071	9.41986
BP_RS07245	bp1452	carA	carA	glutamine-hydrolyzing carbamoyl-phosphate synthase small subunit	Carbamoyl-phosphate synthase small chain (EC 6.3.5.5) (Carbamoyl-phosphate synthetase glutamine chain)	4	A	0.691824	13.6774	13.5344	13.5222	13.1617	12.9211	12.9242	12.9072	12.9678	12.9143	13.2106	13.1851	13.1062	12.7954	12.6583	12.807	12.5409	12.5077	12.6085	12.5409	12.0366	10.8862
BP_RS07250	bp1453	carB	carB	carbamoyl-phosphate synthase large subunit	Carbamoyl-phosphate synthase large chain (EC 6.3.5.5) (Carbamoyl-phosphate synthetase ammonia chain)	4	A	0.8962	14.2172	14.2412	14.1619	13.6286	13.6326	13.5975	13.3803	13.5078	13.5097	13.6515	13.5754	13.5798	13.27	13.0302	13.1801	12.9175	12.877	13.1903	13.0013	12.7435	12.5461
BP_RS07255	bp1454	_	_	SDR family oxidoreductase	_	4	A	0.630937	8.51706	8.3656	8.34176	7.81219	7.60709	7.84264	7.57598	7.33463	7.69942	7.31461	7.53497	7.70682	7.09472	6.92603	7.31353	7.15247	7.23481	7.12232	7.02268	7.24479	6.39776
BP_RS07260	bp1455	_	gpmB	histidine phosphatase family protein	Probable phosphoglycerate mutase 2 (EC 5.4.2.1)	11	_	0.691423	10.1676	10.3016	10.2416	10.5602	10.5901	10.5748	10.2946	10.441	10.5369	10.7511	10.7984	10.7669	10.0479	9.92079	10.127	10.4267	10.4437	10.3772	10.5859	10.31	9.81468
BP_RS07265	bp1456	_	_	LysR family transcriptional regulator	LysR-family transcriptional regulator	7	A	0.405916	7.63595	7.52988	7.50985	7.26297	7.2325	7.10127	7.04686	7.08323	7.22688	7.05251	6.91322	6.9014	6.33292	6.67236	6.46647	7.31665	7.25047	7.13138	6.78548	7.14001	7.40836
BP_RS07270	bp1457	_	_	ABC transporter ATP-binding protein	Probable ATP-binding component of ABC transporter	_	_	0.0162591	6.38765	6.24972	6.0977	5.32023	5.54627	5.16886	5.7157	5.26265	4.98454	5.00586	5.01269	5.02943	5.34943	5.70985	5.13721	5.5157	5.4284	5.48317	4.85111	5.69704	5.56808
BP_RS07275	bp1458	_	_	iron ABC transporter permease	Probable permease component of ABC transporter	_	_	0.0464032	7.18355	7.12173	7.17292	6.72904	6.3314	5.87255	5.77863	6.11317	5.43648	6.07552	5.8935	6.40882	6.10523	6.57147	6.14661	6.23906	6.35565	6.36348	6.13352	6.28601	5.2433
BP_RS07290	bp1460	_	_	EAL domain-containing protein	_	_	_	0.199005	6.54385	6.48911	6.44832	5.81195	5.93571	5.96518	5.68317	5.35565	5.37376	5.03656	5.44673	5.77303	5.89845	6.48582	5.58105	5.7078	6.46537	5.76422	5.48405	6.01123	5.43769
BP_RS07295	bp1462	aroC	aroC	chorismate synthase	Chorismate synthase (CS) (EC 4.2.3.5) (5-enolpyruvylshikimate-3-phosphate phospholyase)	6	_	0.753287	10.8512	10.926	10.9918	11.0463	11.1768	11.1581	10.7452	10.8615	10.8587	10.8608	10.902	10.8516	10.8258	10.7547	10.8988	11.0464	11.023	11.0371	10.9156	10.9133	10.975
BP_RS07300	bp1463	_	_	M48 family metallopeptidase	Putative lipoprotein	7	A	0.629514	9.70662	9.69669	9.75444	10.0278	9.92048	9.89632	9.69259	9.79424	9.7504	9.67962	9.59097	9.60751	9.51352	9.36841	9.41606	9.73981	9.62275	9.57084	9.61084	9.53299	9.89841
BP_RS07305	bp1464	mobB	mobB	molybdopterin-guanine dinucleotide biosynthesis protein B	Molybdopterin-guanine dinucleotide biosynthesis protein B	7	A	0.331249	9.61626	9.57789	9.51315	9.31916	9.26003	9.15033	9.27124	9.14502	9.09896	9.19184	8.96849	9.16742	9.0652	8.93068	8.73356	8.81743	8.9961	9.00271	9.20222	8.878	9.17101
BP_RS07310	bp1465	_	moeA	molybdopterin molybdotransferase MoeA	Molybdopterin molybdenumtransferase (EC 2.10.1.1)	7	A	0.852768	10.9945	10.9683	10.9605	10.7015	10.6399	10.6843	10.5749	10.5824	10.6327	10.519	10.5122	10.4464	10.0572	9.97088	10.1107	10.3489	10.2889	10.4785	10.4377	10.4062	10.6806
BP_RS07315	bp1466	mobA	mobA	molybdenum cofactor guanylyltransferase MobA	Molybdenum cofactor guanylyltransferase (MoCo guanylyltransferase) (EC 2.7.7.77) (GTP:molybdopterin guanylyltransferase) (Mo-MPT guanylyltransferase) (Molybdopterin guanylyltransferase) (Molybdopterin-guanine dinucleotide synthase) (MGD synthase)	11	_	0.610167	12.1	12.0396	12.0011	11.73	11.3204	11.2846	11.4811	11.4425	11.3671	11.4175	11.3138	11.3709	11.0381	11.1144	11.049	11.2915	11.2493	11.3954	11.3859	11.2643	11.3523
BP_RS07320	bp1467	apbC	_	iron-sulfur cluster carrier protein ApbC	Iron-sulfur cluster carrier protein	5	C	0.652228	10.7233	10.6994	10.7813	10.8956	10.999	11.07	10.7821	10.8529	10.8754	10.6947	10.6478	10.6567	10.5456	10.5332	10.5524	10.8188	10.799	10.7893	10.7418	10.8845	11.094
BP_RS07325	bp1468	_	_	DUF3305 domain-containing protein	Uncharacterized protein	7	A	0.574203	9.92264	9.7063	9.92577	9.97998	9.87686	9.85054	9.67326	9.67224	9.5037	9.77118	9.86002	9.75729	9.45461	9.37654	9.51094	9.83165	9.6831	9.69434	9.76507	9.83925	10.1071
BP_RS07330	bp1469	_	_	DUF3306 domain-containing protein	Uncharacterized protein	7	A	0.663323	9.82379	9.69089	9.73086	9.85331	9.38511	9.36857	9.40923	9.39458	9.2999	9.22753	9.25452	9.46291	9.00374	8.85216	8.91733	9.19557	9.2276	9.47829	9.19605	8.92674	9.20046
BP_RS07335	bp1470	_	_	4Fe-4S binding protein	Putative iron-sulfur binding protein	3	B	0.936593	11.3843	11.4074	11.4872	11.459	11.2823	11.2859	11.4065	11.4137	11.4781	11.359	11.4142	11.4243	11.9996	11.9459	12.0041	11.9194	11.8719	12.0134	11.8949	11.7607	11.5991
BP_RS07340	bp1471	_	_	molecular chaperone TorD family protein	Uncharacterized protein	5	C	0.681099	8.77086	8.9909	8.92353	8.99721	9.18051	9.12563	8.97289	8.99998	9.13255	8.97344	9.14042	8.94559	8.67675	8.30185	8.40208	8.93095	8.90949	9.05189	9.05322	9.18068	9.82098
BP_RS07350	bp1472	_	fdhA	formate dehydrogenase subunit alpha	Formate dehydrogenase large subunit (EC 1.2.1.2)	5	C	0.758986	11.5144	11.6112	11.5376	11.964	11.9336	11.987	11.8737	11.9374	12.0148	11.9601	11.8664	11.864	11.5327	11.3726	11.4777	12.0495	11.9656	12.1298	12.1292	12.2322	12.9611
BP_RS07355	bp1473	_	_	4Fe-4S dicluster domain-containing protein	_	5	C	0.865248	9.04738	9.28634	9.32298	10.0486	10.2631	10.193	10.0551	10.2623	10.2991	10.3148	10.1901	10.3362	9.65415	9.46236	9.73422	10.3005	10.3498	10.3342	10.5723	10.7062	11.112
BP_RS07360	bp1474	_	_	lipoprotein	Putative lipoprotein	5	C	0.675707	6.99488	7.12173	7.00288	7.62626	8.12088	7.90312	7.61099	8.00928	7.87704	7.97466	7.92263	7.62667	7.21244	6.88201	6.7154	7.68695	7.79103	7.87356	7.75395	7.77025	8.45707
BP_RS07365	bp1475	_	fdhC	formate dehydrogenase subunit gamma	Formate dehydrogenase subunit C (EC 1.2.1.2)	5	C	0.878649	8.95376	9.10784	9.13027	9.637	9.68154	9.58229	9.66681	9.57287	9.51468	9.55739	9.49286	9.52636	8.60449	8.24951	8.52581	9.19777	9.11615	9.38958	9.24765	9.25355	9.709
BP_RS07370	bp1476	_	_	hypothetical protein	Putative exported protein	4	A	0.499718	6.41898	6.92197	6.36953	6.93532	7.01171	7.25018	6.9663	7.07488	6.98036	6.6021	7.05528	7.07168	6.29912	5.94662	6.26827	6.93414	6.65484	6.74252	6.66765	6.74472	7.13885
BP_RS07375	bp1477	_	_	helix-turn-helix transcriptional regulator	Uncharacterized protein	7	A	0.51177	9.1342	8.96016	8.98053	9.19852	8.95094	9.06153	9.07897	8.92187	8.85447	8.82616	8.81381	8.86638	8.60126	8.54953	8.61656	8.71684	8.73807	9.03741	8.253	8.63296	8.54123
BP_RS07380	bp1478	_	_	ABC transporter permease	_	4	A	0.804205	9.21858	9.2921	9.42907	9.59735	9.28115	9.23488	9.36003	9.41232	9.54487	9.32095	9.60446	9.49143	8.63492	8.29639	8.39271	9.06183	9.00294	8.97193	8.8203	8.66018	7.71059
BP_RS07385	bp1479	_	_	phosphate ABC transporter ATP-binding protein	Probable ATP-binding component of ABC transporter	7	A	0.907215	8.90425	8.90069	8.78923	9.24348	8.96153	9.12393	9.12595	9.22004	9.24278	8.85367	9.08352	9.10937	8.01961	7.78374	7.69357	8.47338	8.48925	8.50863	8.37004	8.39293	7.92919
BP_RS07390	bp1480	_	_	substrate-binding domain-containing protein	Putative exported protein	6	_	0.857344	9.42639	9.58817	9.58651	10.4195	10.5788	10.4797	10.6096	10.9471	10.8574	10.9352	10.8403	10.7762	10.3899	10.0794	10.2707	10.8534	10.704	10.7413	11.1992	11.2409	11.7581
BP_RS07395	bp1481	leuC	leuC	3-isopropylmalate dehydratase large subunit	3-isopropylmalate dehydratase large subunit (EC 4.2.1.33) (Alpha-IPM isomerase) (IPMI) (Isopropylmalate isomerase)	2	B	0.839513	10.9248	10.921	11.0221	12.17	12.2947	12.2157	11.9393	12.0818	12.2206	12.3728	12.2013	12.2135	12.931	12.831	12.798	12.5577	12.4586	12.58	12.7929	12.8249	13.5591
BP_RS07400	bp1482	leuD	leuD2	3-isopropylmalate dehydratase small subunit	3-isopropylmalate dehydratase small subunit 2 (EC 4.2.1.33) (Alpha-IPM isomerase 2) (IPMI 2) (Isopropylmalate isomerase 2)	6	_	0.872056	9.16832	9.33774	9.51622	10.5126	10.4384	10.1734	10.2911	10.2578	10.4489	10.8641	10.7087	10.5947	11.0699	11.0371	11.2167	10.8851	10.7623	10.9008	11.1903	11.247	11.8409
BP_RS07405	bp1483	leuB	leuB	3-isopropylmalate dehydrogenase	3-isopropylmalate dehydrogenase (EC 1.1.1.85) (3-IPM-DH) (Beta-IPM dehydrogenase) (IMDH)	3	B	0.860991	9.13958	9.37312	9.53449	10.1851	10.1668	10.017	10.0797	10.1812	10.3077	10.6339	10.5192	10.4972	10.8407	10.5758	10.6604	10.4884	10.4273	10.4836	10.8848	10.9517	11.2308
BP_RS07410	bp1484	asd	asd	aspartate-semialdehyde dehydrogenase	Aspartate-semialdehyde dehydrogenase (ASA dehydrogenase) (ASADH) (EC 1.2.1.11) (Aspartate-beta-semialdehyde dehydrogenase)	8	_	0.65924	11.3472	11.6188	11.7269	12.2281	12.3783	12.3658	12.0685	12.2787	12.2351	12.5104	12.4079	12.4023	12.2478	12.016	12.2247	12.0239	11.9933	12.045	12.1447	11.9895	11.4772
BP_RS07415	bp1485	fimV	_	FimV N-terminal domain protein	Putative membrane protein	4	A	0.257069	12.1878	12.1306	12.1825	12.2823	12.2446	12.1411	12.1803	12.2156	12.0602	12.2166	12.3219	12.2447	12.0174	11.8549	12.0739	12.1517	12.0203	12.0358	12.3237	12.1427	11.4383
BP_RS07420	bp1486	truA	truA	tRNA pseudouridine(38-40) synthase TruA	tRNA pseudouridine synthase A (EC 5.4.99.12) (tRNA pseudouridine(38-40) synthase) (tRNA pseudouridylate synthase I) (tRNA-uridine isomerase I)	4	A	0.882822	9.50142	9.47455	9.50545	9.40687	9.51402	9.35656	9.2078	9.37388	9.46475	9.15783	9.33871	9.37607	8.91175	8.87457	8.90078	8.63326	8.81359	8.76695	8.52752	8.48914	8.14832
BP_RS07425	bp1487	_	smoM	TRAP transporter substrate-binding protein	Putative periplasmic solute-binding protein	5	C	0.993592	12.3542	12.5355	12.5993	12.6266	12.86	12.8361	13.2467	13.2672	13.2611	13.4363	13.2165	13.2452	11.1341	10.9645	11.0216	13.4224	13.3234	13.387	14.4506	14.3609	14.4327
BP_RS07430	bp1488	_	_	TRAP transporter small permease subunit	Putative membrane protein	5	C	0.942287	11.3961	11.505	11.527	10.8923	10.8962	10.6772	10.9123	10.9024	10.9623	11.1499	10.9602	11.0974	9.84976	9.5181	9.73187	10.6968	10.7664	10.6978	11.5375	11.2989	10.9288
BP_RS07435	bp1489	_	_	TRAP transporter large permease subunit	Putative membrane protein	5	C	0.955634	12.5456	12.6828	12.6958	12.025	12.0986	12.0086	12.2047	12.2622	12.0606	12.3348	12.1004	12.1312	10.7318	10.6919	10.7204	11.9133	11.7241	11.7979	12.6329	12.4082	12.1062
BP_RS07440	bp1490	_	trpF	phosphoribosylanthranilate isomerase	N-(5'-phosphoribosyl)anthranilate isomerase (PRAI) (EC 5.3.1.24)	4	A	0.896301	9.24321	9.43851	9.55999	9.29554	9.60116	9.65802	9.68357	9.54465	9.46998	9.28391	9.3989	9.32124	8.39032	8.06272	8.14947	8.89827	9.06847	9.14154	9.33445	9.31052	9.3974
BP_RS07455	bp1492	_	_	sensor domain-containing diguanylate cyclase	GGDEF domain-containing protein	7	A	0.53789	10.0435	9.98779	9.75085	8.63719	8.27816	8.36936	8.46147	8.21722	8.28869	8.46082	8.44438	8.51214	8.72267	8.66577	8.57544	8.29987	8.27239	8.2708	8.27072	8.26949	7.8421
BP_RS07465	bp1494	_	_	coproporphyrinogen III oxidase	_	6	_	0.280766	7.09004	7.29898	7.3332	7.38177	7.56998	7.8852	7.43657	7.50174	7.63382	7.2991	7.35468	7.25359	7.68254	7.81398	7.69891	7.52253	7.86005	7.59668	7.3495	7.43394	6.93737
BP_RS07470	bp1495	_	_	hypothetical protein	Uncharacterized protein	2	B	0.897233	7.59742	7.7925	7.54157	8.12934	8.01321	8.17281	8.42668	8.13905	8.30337	8.24304	8.17445	8.11009	9.2766	9.16915	9.27278	8.85687	9.07074	8.80236	9.17111	9.26053	9.93426
BP_RS07475	bp1496	_	_	response regulator transcription factor	Probable two-component response regulator	1	B	0.876918	9.13617	9.09178	8.959	9.61413	9.61672	9.79997	9.89894	9.8246	9.85803	9.74212	9.67333	9.83542	10.8346	10.9056	10.905	10.5756	10.3182	10.3786	10.6727	10.7745	11.7454
BP_RS07480	bp1497	thrS	thrS	threonine--tRNA ligase	Threonine--tRNA ligase (EC 6.1.1.3) (Threonyl-tRNA synthetase) (ThrRS)	10	D	0.796938	14.2794	14.2166	14.2661	13.8339	13.6523	13.5883	13.7363	13.5701	13.6092	13.7917	13.761	13.8082	14.0212	13.8741	13.9164	13.5577	13.4231	13.5819	13.6417	13.4821	13.4968
BP_RS07485	bp1498	infC	infC	translation initiation factor IF-3	Translation initiation factor IF-3	4	A	0.807091	12.7255	12.9406	12.9887	12.497	12.3071	12.2025	12.3181	12.0732	12.1629	12.5276	12.502	12.45	12.2636	12.0797	12.1548	11.9328	11.8521	11.97	12.0444	11.861	11.7591
BP_RS07490	bp1499	gshB	gshB, gsh-II	glutathione synthase	Glutathione synthetase (EC 6.3.2.3) (GSH synthetase) (GSH-S) (GSHase) (Glutathione synthase)	4	A	0.728889	12.4472	12.4706	12.4886	11.8584	11.3573	11.3213	11.3414	11.3791	11.3467	11.6622	11.605	11.6033	11.4574	11.3297	11.3681	11.1681	11.1495	11.2082	11.1468	11.0744	10.9554
BP_RS07495	bp1500	_	_	PTS mannose transporter subunit IIA	Putative IIa component of sugar transport PTS system	7	A	0.518531	9.44701	9.42037	9.43909	8.75555	8.41947	8.18118	8.48678	8.34678	8.27564	8.11322	8.1642	8.13149	8.34583	7.93632	8.26623	7.63514	7.76679	8.03082	7.88557	7.78927	8.10611
BP_RS07500	bp1501	_	ptsH	HPr family phosphocarrier protein	Phosphocarrier protein HPr	7	A	0.689052	8.80298	8.67895	8.64135	8.1993	7.90422	8.18211	7.96692	8.1118	7.8765	7.19349	7.54333	7.58747	7.61905	7.71581	7.77401	7.32472	7.49646	7.40112	7.23932	6.98822	7.44378
BP_RS07505	bp1502	ptsP	ptsI	phosphoenolpyruvate--protein phosphotransferase	Phosphoenolpyruvate-protein phosphotransferase (EC 2.7.3.9) (Phosphotransferase system, enzyme I)	4	A	0.839097	10.9003	10.7363	10.7134	10.8062	10.6985	10.6651	10.4331	10.5343	10.446	10.326	10.2579	10.4079	10.177	10.1599	10.252	10.3164	10.2237	10.3808	10.1508	10.1087	10.0031
BP_RS07515	bp1504	_	_	OsmC family protein	_	1	B	0.925093	7.93086	7.72793	7.79436	7.98721	8.38398	8.14258	8.22087	8.3709	8.32156	8.48029	8.20067	8.19386	9.60699	9.52101	9.40972	9.21959	9.33344	9.16505	9.59336	9.78291	10.5322
BP_RS07520	bp1505	_	_	ornithine cyclodeaminase family protein	Putative ornithine cyclodeaminase	12	_	0.43912	9.93954	9.8191	9.75574	9.67196	9.55845	9.41095	9.35909	9.57949	9.44085	9.6237	9.63684	9.65862	9.77468	10.0043	9.67422	9.87492	9.78317	9.66853	10.1604	10.0642	9.97285
BP_RS07525	bp1506	_	_	ABC transporter substrate-binding protein	Putative exported protein	3	B	0.720945	10.4283	10.5197	10.6365	10.7695	11.058	11.0435	10.8514	10.9469	10.9233	11.1135	11.0279	11.0535	11.1612	11.0339	11.0985	11.0738	11.0905	11.1632	11.2647	11.314	11.4524
BP_RS07530	bp1507	ehuB	_	ectoine/hydroxyectoine ABC transporter substrate-binding protein EhuB	Putative extracellular solute-binding protein	2	B	0.520115	5.99288	5.1397	5.38751	4.05901	4.04592	5.13579	4.21528	5.29823	4.98951	5.02902	5.23559	5.19972	5.06327	5.93785	6.06224	6.25134	6.03812	5.519	5.5496	6.10148	5.71159
BP_RS07535	bp1508	ehuC	_	ectoine/hydroxyectoine ABC transporter permease subunit EhuC	Putative inner membrane component of binding-protein-dependent transport system	_	_	0.0249675	5.06613	4.70219	4.29796	4.096	3.95862	3.15512	3.72061	3.94304	4.42929	3.69074	4.19057	3.5864	4.22738	5.02508	4.02375	4.20988	4.40755	3.4833	2.72463	4.27432	3.53044
BP_RS07540	bp1509	ehuD	_	ectoine/hydroxyectoine ABC transporter permease subunit EhuD	Putative inner membrane component of binding-protein-dependent transport system	_	_	0.149718	6.82154	6.19829	5.96759	5.70006	5.57144	5.78725	5.78842	5.26265	5.11435	5.60816	5.5479	5.09068	6.05535	6.05186	6.09868	5.77523	5.94647	5.6006	5.97764	5.45231	5.96344
BP_RS07545	bp1510	_	_	amino acid ABC transporter ATP-binding protein	Putative ATP-binding component of ABC transporter	10	D	0.415265	7.89118	7.64148	7.54602	7.69094	7.35174	7.19469	7.41161	7.13926	7.23372	7.14337	7.2275	7.28758	7.50018	7.58462	7.43534	7.29736	7.37974	7.48901	7.34488	6.96437	6.9212
BP_RS07555	bp1512	_	_	GFA family protein	CENP-V/GFA domain-containing protein	_	_	0.233677	7.94291	7.78348	8.02267	7.70353	8.29864	8.80094	8.6011	8.40269	8.29457	7.83437	7.92229	7.73458	8.33913	8.52112	8.4254	8.24985	8.27992	8.29203	8.12898	8.36871	8.69647
BP_RS07560	bp1513	_	_	NAD-dependent formate dehydrogenase	Formate dehydrogenase (FDH) (EC 1.17.1.9) (NAD-dependent formate dehydrogenase)	_	_	0.113109	6.83161	6.67424	6.82301	6.33289	6.16898	6.65538	6.50729	6.86097	6.75762	6.46454	7.2843	6.64541	6.3722	6.70381	6.69947	6.71177	6.76481	6.78561	6.71821	6.83879	6.88369
BP_RS07565	bp1514	_	_	zinc ribbon domain-containing protein	CxxC_CXXC_SSSS domain-containing protein	1	B	0.27478	1.45096	3.65719	2.68831	3.08634	2.76957	3.49152	2.441	3.5293	3.15301	3.58896	2.04198	3.37965	3.7307	3.78568	3.59845	3.55336	4.10252	3.94735	3.66495	3.89488	4.16091
BP_RS07570	bp1515	_	_	AmiS/UreI family transporter	Putative transporter protein	1	B	0.505964	4.61159	4.32709	4.03782	4.7517	5.12699	4.22947	5.27264	4.97377	4.85202	4.09118	4.49661	4.60884	5.71333	5.45744	4.53763	5.57107	5.85464	5.67437	5.62191	5.75996	6.05923
BP_RS07575	bp1516	_	fmdA	acetamidase/formamidase family protein	Formamidase (EC 3.5.1.49)	3	B	0.637563	7.14111	7.19214	7.20215	7.04824	6.8685	6.79909	7.41692	6.66767	6.98967	7.25073	6.90496	7.12655	7.73072	7.6319	7.38831	7.64162	7.79949	7.41902	7.62814	8.04787	7.90361
BP_RS07580	bp1517	_	_	helix-turn-helix transcriptional regulator	Putative LuxR-family transcriptional regulator	3	B	0.600265	6.06638	5.78085	5.70651	5.86413	5.76424	5.88642	6.18328	5.92882	5.76799	5.63985	6.19147	6.2013	6.52727	6.75352	6.16545	6.54734	6.69951	6.43814	6.68791	6.46667	7.06385
BP_RS07585	bp1518	_	_	molybdenum cofactor biosysynthesis protein	MOSC domain-containing protein	3	B	0.590528	7.96778	7.8529	7.86031	7.80637	7.6488	7.87416	7.78967	7.79895	7.91781	7.40556	7.35468	7.7133	7.6343	8.03031	7.83531	7.96479	8.16653	8.01197	8.03535	8.28539	8.13833
BP_RS07590	bp1519	_	fba	fructose-bisphosphate aldolase class II	Fructose-1,6-bisphosphate aldolase (FBP aldolase) (EC 4.1.2.13)	9	D	0.88927	12.9104	12.957	12.912	13.0605	13.1848	13.209	12.9961	13.1666	13.2628	13.4606	13.3256	13.3551	14.2102	14.069	14.1572	13.2241	13.1015	13.2665	13.4614	13.2582	12.8875
BP_RS07595	bp1520	_	_	GFA family protein	CENP-V/GFA domain-containing protein	_	_	0.0526651	7.06421	7.09778	7.28364	6.85106	7.08418	7.01484	7.11102	7.04245	6.93967	6.94601	6.76983	6.91271	7.23262	7.1791	7.55827	7.19027	6.93914	6.9579	7.10449	7.47547	6.63696
BP_RS07600	bp1521	_	purC	phosphoribosylaminoimidazolesuccinocarboxamide synthase	Phosphoribosylaminoimidazole-succinocarboxamide synthase (EC 6.3.2.6) (SAICAR synthetase)	7	A	0.327962	12.4472	12.3324	12.285	12.1802	12.0408	11.9859	12.2196	12.1779	12.0573	12.2726	12.3098	12.2624	12.1315	12.1826	12.2535	12.144	11.8933	11.9351	12.3077	12.1707	11.7839
BP_RS07605	bp1522	_	_	type II toxin-antitoxin system MqsR family toxin	Uncharacterized protein	_	_	0.00702933	4.90371	4.79274	4.60515	4.37009	4.48159	4.30053	4.97559	3.79773	4.04975	4.10631	4.05229	4.13077	4.67531	4.3992	3.59721	4.60883	4.31869	3.86572	4.10249	4.1226	2.74663
BP_RS07610	bp1523	_	_	type II toxin-antitoxin system MqsA family antitoxin	Putative DNA-binding protein	_	_	0.101193	5.12441	5.10776	4.80703	4.1868	4.15117	3.52251	3.79579	4.11254	4.75848	3.6169	4.62829	4.05477	4.67603	4.90387	4.58978	4.24032	5.21255	4.77052	4.43775	4.53693	4.57567
BP_RS07615	bp1524	_	_	membrane protein	Putative membrane protein	7	A	0.448217	9.37914	8.83395	8.94222	9.23814	8.77328	8.6961	9.40923	9.23406	9.03411	9.3256	9.31772	9.3476	8.66433	8.87457	8.77985	9.20216	9.01062	9.01354	9.24467	8.99698	8.56208
BP_RS07620	bp1525	_	_	disulfide bond formation protein B	Putative membrane protein	7	A	0.713223	7.48955	7.47096	7.34706	7.17122	7.3087	7.4814	7.70121	7.84899	7.94863	7.36416	7.74367	7.59192	7.10219	6.90147	6.97614	7.22112	6.99184	7.22576	6.972	6.87763	6.61611
BP_RS07625	bp1526	purE	purE	5-(carboxyamino)imidazole ribonucleotide mutase	N5-carboxyaminoimidazole ribonucleotide mutase (N5-CAIR mutase) (EC 5.4.99.18) (5-(carboxyamino)imidazole ribonucleotide mutase)	4	A	0.706028	10.2123	10.2693	10.2471	9.90302	9.48006	9.50594	9.42778	9.54821	9.57502	9.85957	10.0286	9.90219	9.75724	9.50813	9.74117	8.98237	8.85957	9.15795	8.93598	8.51722	6.98473
BP_RS07630	bp1527	_	purK	5-(carboxyamino)imidazole ribonucleotide synthase	N5-carboxyaminoimidazole ribonucleotide synthase (N5-CAIR synthase) (EC 6.3.4.18) (5-(carboxyamino)imidazole ribonucleotide synthetase)	7	A	0.797633	11.7334	11.7112	11.7496	11.5644	11.211	11.3688	11.3278	11.3731	11.3295	11.3724	11.4496	11.4223	11.2267	11.1514	11.2317	10.6294	10.5608	10.7668	10.6568	10.2768	9.35842
BP_RS07635	bp1528	_	_	threonylcarbamoyl-AMP synthase	Threonylcarbamoyl-AMP synthase (TC-AMP synthase) (EC 2.7.7.87) (L-threonylcarbamoyladenylate synthase)	4	A	0.903994	9.99839	10.0509	10.0676	9.53162	9.66453	9.58756	9.478	9.54465	9.52473	9.28843	9.6006	9.58099	8.95056	8.89513	8.99525	8.50216	8.52408	8.66461	8.48297	8.34317	7.92337
BP_RS07640	bp1529	_	_	amino acid ABC transporter substrate-binding protein	Putative extracellular solute-binding protein	3	B	0.963564	9.21069	9.24134	9.21947	9.46861	9.77764	9.68228	10.0468	10.0427	10.056	10.243	10.2411	10.13	10.7467	10.4854	10.514	10.8188	10.6402	10.5537	11.5228	11.6782	12.0214
BP_RS07645	bp1530	_	_	IclR family transcriptional regulator	Putative transcriptional regulator	6	_	0.387864	7.7774	7.96417	7.96544	8.09629	7.95147	7.80605	8.02329	7.8868	7.71134	8.14296	8.10326	8.16968	8.05731	7.93997	7.84607	8.25363	7.92735	8.08142	8.27277	8.12758	8.29981
BP_RS07650	bp1531	_	_	arginase family protein	Putative arginase	5	C	0.972152	8.7471	9.15902	9.15755	10.0535	10.3482	10.3719	10.8126	10.8498	10.8616	10.5071	10.5263	10.5175	9.10147	9.14607	9.04916	10.9554	10.9435	10.7587	11.0366	11.4437	11.4045
BP_RS07655	bp1532	_	_	amino acid ABC transporter substrate-binding protein	Putative amino acid-binding periplasmic protein	5	C	0.978883	8.76993	8.99631	9.16726	10.4216	10.6727	10.7182	11.0504	11.1402	11.0613	11.031	10.9291	10.8993	8.60055	8.47471	8.44075	11.201	11.2005	11.0642	11.7486	11.9296	12.6304
BP_RS07660	bp1533	_	_	amino acid ABC transporter permease	Putative inner membrane component of binding-protein-dependent transport system	5	C	0.975979	7.65048	8.2174	8.3525	9.7868	9.53955	9.64045	10.1679	10.0424	9.93583	9.80994	9.76203	9.83327	7.45356	7.2051	7.38831	9.99746	9.83738	9.76345	10.2682	10.3688	10.8515
BP_RS07665	bp1534	_	_	amino acid ABC transporter ATP-binding protein	Putative ATP-binding component of ABC transporter	5	C	0.968333	7.1566	7.22555	7.68667	8.89424	8.65289	8.69471	9.02249	8.91362	8.90878	8.74073	8.78009	8.77718	6.63233	6.39782	6.69622	8.67954	8.80718	8.56872	8.71983	8.76172	9.10707
BP_RS07670	bp1535	_	_	acetolactate synthase large subunit	Putative thiamine-pyrophosphate-requiring enzyme	5	C	0.818315	9.48439	9.64533	9.60537	9.74019	9.72901	9.66807	9.52355	9.63106	9.5641	9.61921	9.63814	9.54692	9.15349	9.24714	9.23757	9.76389	9.78077	9.69299	9.76059	9.7824	9.53108
BP_RS07675	bp1536	_	_	MaoC family dehydratase	MaoC-like domain-containing protein	7	A	0.540272	8.48185	8.60137	8.53355	8.83497	8.79134	8.79185	8.23554	8.41912	8.59959	8.44665	8.4131	8.4056	8.32267	8.04512	8.132	8.498	8.49896	8.39684	8.58113	8.28092	7.67605
BP_RS07680	bp1537	_	gcdH	acyl-CoA dehydrogenase	Glutaryl-CoA dehydrogenase (EC 1.3.99.7)	5	C	0.714364	11.8119	11.9755	12.013	12.3612	12.6063	12.6129	12.492	12.6238	12.6387	12.718	12.5842	12.5417	12.3806	12.3958	12.4119	12.7171	12.6206	12.7609	12.7873	12.8837	13.1785
BP_RS07685	bp1538	_	ilvG	thiamine pyrophosphate-binding protein	Putative acetolactate synthase large subunit (EC 2.2.1.6)	5	C	0.728207	11.4479	11.5507	11.588	11.9165	11.8235	11.8777	11.8439	11.9392	11.939	12.0912	12.0197	12.0505	11.5268	11.6593	11.6224	12.2816	12.1259	12.3632	12.151	12.0487	11.5581
[truncated: 2,164 more rows]

## Sheet: Supplementary Table 2
Supplementary Table 2. Proteomic results throughout B. pertussis culture. Protein amount (normalized Log2(intensity)) per biological replicates per times points. Protein amount covariance with time, calculated using Longitudinal Gaussian Processes (LGPR). Longitudinal clustering results.
[truncated: 1,342 more rows]

[truncated: 11 more sheets: Supplementary Table 3, Supplementary Table 4, Supplementary Table 5, Supplementary Table 6, Supplementary Table 7, Supplementary Table 8, Supplementary Table 9, Supplementary Table 10, Supplementary Table 11, Supplementary Table 12, Legends]
